# Supplementary material for: Identification of Drought-Responsive microRNAs from Roots and Leaves of Alfalfa by High-Throughput Sequencing
Source: Preprints.org preprint supplement (doi:10.20944/preprints201702.0085.v1), 2017-02-23
Supplement: Supplementary file 1 [file supplementary]

## Sheet: DL1
novel-id		chr-location	length	potential_energy	sequence	read-number
xxx-m0001	GCAUGUGGUUGGGGGUGGGGGGUUGGGACGUUGGGUAGCUUAAUUGGUUUGAGUUAAGGGAUAAGGACUUGGAUGUCCUGGGUUCAAACCUGAACGAAUAAG	NC_016407.2:6871167:6871268:+	102(nt)	-27.60(kcal/mol)
xxx-m0002	UCUUGGGAUCAAAGUCUAAAGCCGGUUGACUAUCAACCCGCCGUCUUUUGGGAACGUAUCACCGGUCUUAGGCAAUUUAAUACACG	NC_016407.2:8651254:8651339:+	86(nt)	-22.30(kcal/mol)
xxx-m0003	CAUGGUCAUUGUUGACCGCUCAUACGACCCCUGCAAUUGCAUUGCAGCUUAUGCGGGGGUCGUAUAACGGUCAACAGAGACUCUUGA	NC_016407.2:10223355:10223441:+	87(nt)	-49.10(kcal/mol)
xxx-m0004	CAUGGUCAUUGUUGACCGCUCAUACGACCCCUGCAAUUGCAUUGCAGCUUAUGCGGGAGUCGUAUAAAGGUCAACAGAGACCCUUGA	NC_016407.2:12525093:12525179:+	87(nt)	-42.70(kcal/mol)
xxx-m0011	UCGUUUGGCUAGAGGUGUGCGGUGGUGGCUGAUGAGAGGGUCAGUGGGGUUUAUUGGUUUUCGUGGUGGCUGAUGCUGGUUUUUGGUGAGGAUU	NC_016407.2:8039226:8039319:-	94(nt)	-23.60(kcal/mol)
xxx-m0012	CGGCUGAAAUUUAUCCGCAGGAAUACCUGAGGAUUUUCAUGCGGUUAUCAUUAUACUAUGGUCACUUCCUGCGGGUAACUGUAUCUUCUGCUGA	NC_016407.2:17965011:17965104:-	94(nt)	-28.30(kcal/mol)
xxx-m0013	AUGGUCAUUGUUGACCGCUCAUACGACCCCUGCAAUUGCAUUGCAGCUUAUGCGGGGGUCGUAUAACGGUCAACAGAGACCCU	NC_016407.2:18276787:18276869:-	83(nt)	-50.90(kcal/mol)
xxx-m0014	ACUUCAGCUUCUGGUGGAGAGUGGAUGUCACUGCCCCAAAGUCAUGAAUCCAUGGUCUGCCAAGUAAACAGCUGAAAG	NC_016407.2:22487390:22487467:-	78(nt)	-25.30(kcal/mol)
xxx-m0015	CAGGCAUUUCUCUGAUGGCUCUGACUUUGUCGGGAUCAACUUCAAUACCCUUUUGACUGACGAUAAAGCCUAGGAGUUUACCAGAUCUGA	NC_016407.2:22489162:22489251:-	90(nt)	-20.50(kcal/mol)
xxx-m0016	ACAGUCUCUUUUGUUCUGUCUGUUCAGGUGCUCUGUACCCACCCAAUCGUGCAGUUGCAUGAACAGGGUUUAACAGUAGUGACAAC	NC_016407.2:26890441:26890526:-	86(nt)	-27.50(kcal/mol)
xxx-m0019	AGGGAAUUUCCGGUGGAGCGGUGAAAUGCGUAGAGAUCGGAAGGAACACCAAUGGCGAAAGCGACAUUUUCCAUCGCUCUCGGUUCACCA	NC_016407.2:43192319:43192408:-	90(nt)	-25.70(kcal/mol)
xxx-m0021	GAUUCUUUACCGCUGGCGUUAACCCUUGAUUCUGCCAUAUUGCCAAUUUUUUGACAGUCUAUCUGGGGUGACCUGGCCGAGUAUGAAU	NC_016408.2:43282776:43282863:+	88(nt)	-21.60(kcal/mol)
xxx-m0022	GUGUAAUUAUAAGUGUCGUGUCGGUGUUUGACACGACACGUGUCAGACAUCGAGACACGUCUAAUUUAAG	NC_016408.2:5891733:5891802:-	70(nt)	-29.60(kcal/mol)
xxx-m0023	GAAGAAUCCAUUUGUGUAUGGUGCUCCUGGAAGUAAGAUUAUUGUAACAACAAGAAUUGCUCACGUGGCAUCAAUUAUGCAGACUGUUGAGCCUUA	NC_016408.2:25743894:25743989:-	96(nt)	-21.40(kcal/mol)
xxx-m0024	UAAUCAGUAAAGUAUAUUAUAUAGAUAAUGAAUACUGAUAAUGAGCUAAGUAACACAUUUAACUCCACAAUUAAAGGACUCGUUGUCUGUAUAAGCUGAAAG	NC_016408.2:30603084:30603185:-	102(nt)	-22.80(kcal/mol)
xxx-m0026	ACAACAUUUUGAUAUGAGGGCGUGGGCUUGUGUGUCUGAGGAUUUUGAUAUUUUGAGAGUAACCAAGUCUCUCCUUGAAUCGGUCACUUCC	NC_016409.2:9849774:9849864:+	91(nt)	-21.20(kcal/mol)
xxx-m0027	ACGUGUGUCUUUAGGUGCUCUGAUACGUAACGGGAUGAGAACUUUGUUAUUGCUUUUAUAUUCCUUACGUAUUGUUUUUGAAGAUUUAUGA	NC_016409.2:17349298:17349388:+	91(nt)	-24.30(kcal/mol)
xxx-m0030	UUGAGAACAGCUGUUGGUUAAGCAAGGAGUAUGGUAACACAUUUUGUUGUAUAGUACCCAUUGCUGCCAAUCUCAACUCAG	NC_016409.2:43033313:43033393:-	81(nt)	-21.20(kcal/mol)
xxx-m0032	ACAUGAACAAAGAUUCCAACAAGACUCUCAGAUGGUGCAAAGAUGGAGGGAAGCUCUAAUACAAGUCGCUGAUCUCUCUGGUUGGGAUCUACAUGA	NC_016410.2:31496488:31496583:+	96(nt)	-24.80(kcal/mol)
xxx-m0033	UAGAGAGGGCUCCGUUUCCGGUAGGAGACCUGAAUAGGUCACCUACCGUAGGAGACAUGGCUAUUUUUU	NC_016410.2:56395476:56395544:+	69(nt)	-29.70(kcal/mol)
xxx-m0034	CGGACCAAACCGGUCGUGGCUUCCACACAAAGCCUUUAAACAAAAGGCUUUGUGUGGAAGCCGCGGCUGGUUUGGUCCA	NC_016410.2:4925733:4925811:-	79(nt)	-71.30(kcal/mol)
xxx-m0036	ACUUUGUCCAUAUGUGCUUCACUAGAUCUGCUUGCAAUUCGUGAUGAACAUUUGGAUCACGCAACUCGGAUCUAGCACGCACAUGAUUUGCAAAAGUG	NC_016410.2:16174584:16174681:-	98(nt)	-29.30(kcal/mol)
xxx-m0037	GACCUAAUCAAUGUCGGCCGGGGUGAGAGGCAUGAUCCUUUGAGACCAAAGAGCUUUCUCGGUGUUUGCCUUGGAGAAUACGGAUUUGGGUA	NC_016410.2:17304880:17304971:-	92(nt)	-23.90(kcal/mol)
xxx-m0038	GGAAUGACCACGACCACGACCACGACCAUGACCACGACCGCGACCACGAGCUUCUCCAAAAUGGUUGUGUUGUGAUGCAUUCG	NC_016410.2:42406803:42406885:-	83(nt)	-21.60(kcal/mol)
xxx-m0040	UCAUCGACCGCAUCUGCUGCCACACCAUAUGCUAACAUUCGCAUUGUUGUGGUACAUUUUGCUAACGGUGAU	NC_016410.2:53182832:53182903:-	72(nt)	-23.90(kcal/mol)
xxx-m0042	GUAAGGAGUUUCAGUGCACGAUGUUUGCAGAGAACUUCAUUGUUAGAAACUCUAAAGCAAGUCUAUAAAUAUCGUGCACUGAAUCUCUUUUACA	NC_016411.2:15342296:15342389:+	94(nt)	-38.20(kcal/mol)
xxx-m0043	AUCUUGGCUCAAGCAUCAACCUCAUGCCUUUGUCUGUUGCCAAAAGAGUUGGUGACUUGUGUAUUAAGCGGACUAGGAUGACUUUGCAAUUGGCCGAUAA	NC_016411.2:20171328:20171427:+	100(nt)	-27.10(kcal/mol)
xxx-m0045	AGCGGUAUUGAUAAUGGUGGUGUUGAAGCAUGUGAGAUUGCGUUGAACACCCCACGUCGGUAAUGGUA	NC_016411.2:23103683:23103750:+	68(nt)	-23.40(kcal/mol)
xxx-m0046	CCAUGGCUCCCUUCCUCCUUCUUCCUCGGCUCCUAUCACAGUGGCUACGGCCGGGUGGAUGUUGAAGCUCAGCCUGU	NC_016411.2:28309834:28309910:+	77(nt)	-22.60(kcal/mol)
xxx-m0049	UUGUCAACUGAGUCCAUGAUAUGAUCAUAAUAGUAUAGCGGUUGCGAACCGCUCCGCAAUUCGUGGUAGUGGUGUGGAAUCAGUUAGCGC	NC_016411.2:2327884:2327973:-	90(nt)	-30.30(kcal/mol)
xxx-m0051	UGAGUGGCGGUGAGGUCUUGUUUUAAGGCGAGGUGAGUUGUGGCGAGACGUUGGUUGUCGUGGAGGAGGGUUUGGAUUUCGCGGUGGCGGG	NC_016411.2:30972628:30972718:-	91(nt)	-23.90(kcal/mol)
xxx-m0053	CCUUGAAUUCUCUAAUCUCUGUUCCCAAUUACACUUAAUCCAUGAAAAGAUCAAGUGAGUUUGGGAUCAGAAAUUAGAGAUAUCAAUA	NC_016411.2:42295745:42295832:-	88(nt)	-33.90(kcal/mol)
xxx-m0054	AGGUGAGUAGGGUUGGGAAUAGGCCAGACCGGCCUACAGGGGCCUACGGUCUGGCCUGCUUUGGCCUGGCCUGGCC	NC_016412.2:4173755:4173830:+	76(nt)	-41.10(kcal/mol)
xxx-m0059	AUGGUCAUUGUUGACCGCUCAUACGACCCCUACAAUUGCAUUGCAGCUUAUGCGGGGUUUGUAUAACGGUCAACAGAGACUCU	NC_016412.2:29435962:29436044:-	83(nt)	-34.10(kcal/mol)
xxx-m0060	GACACACACAUUUCUUUUACCAUCAGGCGAGUGUAUGAUAACAUUGUAAGACGUUCAUAUGCUCCUUGGUUUAAAGAUUAACGGUGAACC	NC_016412.2:32633043:32633132:-	90(nt)	-21.60(kcal/mol)
xxx-m0062	UCUGCCAUUAAACGGAGCAGUGUGAGAUUUUCAAUCCGCCAUCAGUAGUUGAUCCACCACGCUCUGCCCUUUUUGGCGGU	NC_016413.2:9256177:9256256:+	80(nt)	-23.50(kcal/mol)
xxx-m0063	CGGCAUAUGAUAGGCCAUAGGCAGGCUCAGGCUUGUGAUUUAUUUCGUAGACCAUACUCAGGCCUAUCAAAGUCUGACCUGACCUGACCUAUUCCCACCC	NC_016413.2:27595658:27595757:+	100(nt)	-30.40(kcal/mol)
xxx-m0065	AGUGGGGGCAACAAUGUGGUGGAACAUGGCUUAGGAUUUGCCAGGUUGGGUUAGUGGCUGCACCAUGCUGGCCUGCCCACUC	NC_016413.2:37147500:37147581:+	82(nt)	-26.30(kcal/mol)
xxx-m0066	UCACGCCGUUGCAUUUGGGUCAAUGGACCUGUGAUCAUAGGUGCAGGUCCAUCUGGUCUUGCAACGGCAGCA	NC_016413.2:39838972:39839043:+	72(nt)	-35.90(kcal/mol)
xxx-m0067	UCAAAGAAUACCACAUGUUAGUGAAAUGUGGGGGUUCUCAGGGAUGAUCGAGAGUAUUGACUGCAUGCACUGGGAGUGGAAAAAUUGUC	NC_016413.2:40301396:40301484:+	89(nt)	-20.90(kcal/mol)
xxx-m0068	CCCCUGUCGGACGGCCUGGCCUGUUCCCACCCCUAACAACACUCAAGGGAAUGGUUACGUCCCUCGGAGAUAGGAG	NC_016413.2:46374616:46374691:+	76(nt)	-24.50(kcal/mol)
xxx-m0069	ACGCCUCCUUUUGAGAUUGCAACUCCUGGUUCAUUCAUUGUAUCAUUGCUUGCAUCUCAAGAGGAGGCUC	NC_016413.2:4285926:4285995:-	70(nt)	-33.30(kcal/mol)
xxx-m0070	AAAAAGCUAGAAUCCGUUAAUCGAUCGAGAGAUUGCAGCUGUUACGCUUGGUUGAUGUCUCUGACCGCAAGCGGAAUAGCCCUAU	NC_016413.2:8107432:8107516:-	85(nt)	-25.60(kcal/mol)
xxx-m0072	GGCAUGGCAAUGGGGCGGGGUGGGGACGGGUUUUACCUUCCCCAUCCCCAUACCCUAUUCUCAUAUA	NC_016413.2:10996248:10996314:-	67(nt)	-34.40(kcal/mol)
xxx-m0074	AACUUUGUCCAUAUGUGCUUCACUAGAUCUGCUUGCAAUUCGUGAUGAACAUUUGGAUCACGCAACUCGGAUCUAGCACGCACAUGAUUUGCAAAAGU	NC_016414.2:15054040:15054137:+	98(nt)	-29.10(kcal/mol)
xxx-m0075	UAGCGCAGCUUGGUAGCGCGUUUGUUUUGGGUACAAAAUGUCACAGGUUCAAAUCCUGUCAUCCCUAUCCCUAACUAGUAGUUAUCGUAUCAGCAG	NC_016414.2:17652459:17652554:+	96(nt)	-20.30(kcal/mol)
xxx-m0076	ACGCAGGGUCCGGGAAAUGGUCACAUCCUUUGGUGUAUUGUACGCAACCUUACCCUGUUUUUACACAAGAGGCUGUUUCCAGGACUUGAACCCGUG	NC_016414.2:18164793:18164888:+	96(nt)	-28.50(kcal/mol)
xxx-m0080	UUCUUUUUUGGAUUCUGGGGUCCUCUUUUACUAUUAUUCUGAUUAUUAGAUUACAUUAGAGAAACCUUAGGAUCCACACAUUCC	NC_016414.2:3639066:3639149:-	84(nt)	-22.30(kcal/mol)
xxx-m0081	AAGAGAAGUUAGAACUAUUGGAAUUUGGGGCAUGGGAGGCAUAGGAAAGACAACCCUUGCUGCUGCCAUAUUUCAGAAGGUAUCUUCCAUG	NC_016414.2:12421715:12421805:-	91(nt)	-22.00(kcal/mol)
xxx-m0082	GGGUCUUCAUCAAGAUCUCCCCCUUCUGUGGCAACUCUUACAGGAGGAGUGGUAAGUGUAAGAUCA	NC_016414.2:12933257:12933322:-	66(nt)	-20.00(kcal/mol)
xxx-m0083	AUGUCAUGGCCCGGUGCUCCUUGAUGGAAGGCAUAGGAGAGGUUAGAUUGAUACCAAGCUGGCAACGUGUUAGGCACCCGAGGAGGCGCUCUGGUCUUGAUA	NC_016414.2:20736634:20736735:-	102(nt)	-33.60(kcal/mol)
xxx-m0084	UUAAAGCGCUCCUGAAGAAAUAGUGCUCCUGAAGUGAUGACGUCAUCAGAAGCAAGUUCAUCAGAAGCAAGUUUAUC	NC_016414.2:22674001:22674077:-	77(nt)	-20.90(kcal/mol)
xxx-m0086	CGGAUAGGUGAUCUGCUCGGCCUCGGACACGAAUUUCCUGACCCGCCCUUCGCGCGCGAUGUUGAGCCCGCCUGCCCCGA	NW_013655792.1:1076:1155:-	80(nt)	-26.10(kcal/mol)
xxx-m0088	GGUCGCGAUGGGCCGCCGUAUGCGCACCGUGAUCGUGAUGCUCAUCGUCGUGAUCAUGGUCGUGGUCGUGGUCGUGCCCAUGAUGAU	NW_013656059.1:1178:1264:-	87(nt)	-41.00(kcal/mol)
xxx-m0089	GAGCCUGAUGAUUUAGAUUGAAUUGCGGAUGUGCCUGUCGUCGAGGAUGACCUUUCACCAUAUUCACUUCCUGGUCUUUCUCUUUUGAAUUGCCGGCGG	NW_013656353.1:2305:2403:-	99(nt)	-21.50(kcal/mol)
xxx-m0091	AUGCUCCUUCACGUUUGUUGCUGACUGCUGUAAAUCUGGAGGCCUACUCGAAGGCGCAAAGGAAAUAGUUGGUCAUAGCAAGAUUGGAUCUA	NW_013657209.1:6734:6825:-	92(nt)	-22.50(kcal/mol)
xxx-m0092	UCGGUAUGACCUUAAUAAUACAGAUGCGCAAGCGCGCGCGAGGAAUUUUGGCCUACGGGACGCCUCCCGACGUGGUUUGGCCUGAGCACGGGUUCCCG	NW_013657397.1:33581:33678:+	98(nt)	-28.60(kcal/mol)
xxx-m0094	GCGCCACUGGCUUUUCAACCAAGCGCGAUGACCAAUUGUGCGAAUCAACGGUUCCUCUCGUACUAGGUUGAAUUACUAUUGCGACA	NW_013657494.1:20963:21048:+	86(nt)	-24.10(kcal/mol)
xxx-m0095	GCGCCACUGGCUUUUCAACCAAGCGCGAUGACCAAUUGUGCGAAUCAACGGUUCCUCUCGUACUAGGUUGAAUUACUAUUGCGACA	NW_013657494.1:24202:24287:+	86(nt)	-24.10(kcal/mol)
xxx-m0098	UUGAUUCGCACAAUUGGUCAUCGCGCUUGGUUGAAAAGCCAGUGGCGCGAAGCUACCGUGCGUUGGAUUAU	NW_013657497.1:12370:12440:-	71(nt)	-26.70(kcal/mol)
xxx-m0100	CACAGGGAUAACUGGCUUGUGGCAUCCAAGCGUUCAUAGCGACGUUGCUUUUUGAUCCUUCGAUGUCGGCUAUUCCUAUC	NW_013657497.1:43796:43875:-	80(nt)	-21.60(kcal/mol)
xxx-m0101	UGCGAGGUGGGUAGUUUAUCUGGGGCGGAUGCCUCCUAAAGAGUAACGGAGGUGUGCGAAGGUAGGCUCAAGCUAAGAU	NW_013657516.1:7984:8062:+	79(nt)	-24.90(kcal/mol)
xxx-m0104	UGGCUGGAAGAGCACCGCACGUCACGUGGAGUCCGGUGCGCCCCUGGCGGCCCUUUAAAAUCCGGAGGACCGAGUGCCUUCCUUGCCC	NW_013657528.1:88844:88931:-	88(nt)	-34.70(kcal/mol)
xxx-m0105	UGGGCCAAAUCACGUCGGGAGCACGUGCUCGGGCCAAACCACGUCGGGGGGCAGAAAUUCCUCGAGCGCGCCUGCGCGCCCGUGUUAUUAAGGUCAU	NW_013657528.1:96002:96098:-	97(nt)	-34.70(kcal/mol)
		25
		102
		27
		22
		21
		14
		223
		13
		74
		14
		136
		13
		24
		14
		38
		23
		12
		68
		328
		10
		15
		15
		11
		14
		10
		49
		11
		31
		61
		15
		35
		504
		10
		18
		31
		15
		72
		42
		234
		16
		12
		10
		16
		13
		10
		14
		10
		10
		38
		10
		10
		21
		25
		151
		18
		62
		14
		14
		82
		582
		35
		118
		29
		22

## Sheet: DL2
novel-id		chr-location	length	potential_energy	sequence	read-number
xxx-m0001	UUUGCAAAUCAUGUGCGUGCUAGAUCCGAGUUGCGUGAUCCAAAUGUUCAUCACGAAUUGCAAGCAGAUCUAGUGAAGCACAUAUGGACAAAG	NC_016407.2:2477897:2477989:+	93(nt)	-25.10(kcal/mol)
xxx-m0002	UCUUGGGAUCAAAGUCUAAAGCCGGUUGACUAUCAACCCGCCGUCUUUUGGGAACGUAUCACCGGUCUUAGGCAAUUUAAUACACG	NC_016407.2:8651254:8651339:+	86(nt)	-22.30(kcal/mol)
xxx-m0005	AACUUAAUGCAUUUGGGUCAUUUAAUCGGUUGGGAAAUCGUCGAUUAAACGAUCCAAUCGACUUUGUGAUUAUAUAAAUGUUUGGGAA	NC_016407.2:36084121:36084208:+	88(nt)	-24.00(kcal/mol)
xxx-m0006	UCCGAAAACUUGUGGCUGCUCAAUGCUGUUUUGCUGCUUCGGUAUGGGACAGUUGUGACCAAGUGGCCAAGAGUUUGUCUAG	NC_016407.2:1892323:1892404:-	82(nt)	-26.20(kcal/mol)
xxx-m0007	AUGCCUCCUUUUGAGAUUGCAACUCCUGGUUCAUUCGUUGUAUCAUUGCUUGCAUCUCAAGAGGCAGCUC	NC_016407.2:22121133:22121202:-	70(nt)	-24.20(kcal/mol)
xxx-m0008	CAGGCAUUUCUCUGAUGGCUCUGACUUUGUCGGGAUCAACUUCAAUACCCUUUUGACUGACGAUAAAGCCUAGGAGUUUACCAGAUCUGA	NC_016407.2:22489162:22489251:-	90(nt)	-20.50(kcal/mol)
xxx-m0009	UUAAUUUAGCAGACAGGCUCGUAGCUUCCAGAGGAUUGGAUUCAUCAUGGAAUGUAUUCAAGGCAUCAGAAGGCAGGUCCUCGUCUGUUUUAUUUC	NC_016407.2:43002009:43002104:-	96(nt)	-23.20(kcal/mol)
xxx-m0010	UGGUACUUCAUUUGGAGGCGCUGCUGGUAUGACUGGGUGGAUCAAUGGUGGAUCUACCGGAAAUGUACUUAUUGGUGCUGCAAGAGUACAA	NC_016408.2:17217095:17217185:+	91(nt)	-29.60(kcal/mol)
xxx-m0011	CAGCAACAAGCAAAGCCUGGAUGGUGGCUGCAAGUGUUGGAGUUGUGGAAGCUUUGAAAGAUCAAGCUGGUAUCUGUAGGUGGAACUAUGCUU	NC_016408.2:38024931:38025023:+	93(nt)	-24.10(kcal/mol)
xxx-m0012	ACGCCUCCUUUUGAGAUUGCAACUCCUGGUUCAUUCGUUGUAUCAUUGCUUGCAUCUCAAGAGGCAGCUC	NC_016408.2:38847457:38847526:+	70(nt)	-24.40(kcal/mol)
xxx-m0013	GUGUAAUUAUAAGUGUCGUGUCGGUGUUUGACACGACACGUGUCAGACAUCGAGACACGUCUAAUUUAAG	NC_016408.2:5891733:5891802:-	70(nt)	-29.60(kcal/mol)
xxx-m0015	GAAGAAUCCAUUUGUGUAUGGUGCUCCUGGAAGUAAGAUUAUUGUAACAACAAGAAUUGCUCACGUGGCAUCAAUUAUGCAGACUGUUGAGCCUUA	NC_016408.2:25743894:25743989:-	96(nt)	-21.40(kcal/mol)
xxx-m0016	UAAUCAGUAAAGUAUAUUAUAUAGAUAAUGAAUACUGAUAAUGAGCUAAGUAACACAUUUAACUCCACAAUUAAAGGACUCGUUGUCUGUAUAAGCUGAAAG	NC_016408.2:30603084:30603185:-	102(nt)	-22.80(kcal/mol)
xxx-m0020	AGGGAAAGUAGGUCUAGCUUGUUGAUGUUGUUGUUGUUGUUGAACCGGCAACUGUUGUUUCAUCUGUUGAGCAAUUGCAUUAACGGGUACUUGAGGUUGACCC	NC_016409.2:15892981:15893083:+	103(nt)	-28.50(kcal/mol)
xxx-m0024	CUUAAUGCUUUUGGGUCAUUUAAUCGGUUGGGAAAUCGUCGAUUAAACGAUCCAAUCGACUUUGUGAUUAUUUAAAUGUUUGAGA	NC_016409.2:49434462:49434546:+	85(nt)	-20.80(kcal/mol)
xxx-m0025	GGCCUAUUUAAAAGCCUGGACUGGCCUGAAAGCCUACUUCACAUUAAGGCCAUCAAAUAGUUCAUUUGGCCUACUAAAUAGGUUA	NC_016409.2:51302483:51302567:+	85(nt)	-26.30(kcal/mol)
xxx-m0028	UUGAUGUAUUCAUCGACCGCAUCUGCUGCCACGCCAUAUGCUAACAUUCGCAUUGCUGUGGUACAUUUUGCUAACGGUGAUAUACCUUCUU	NC_016409.2:6047407:6047497:-	91(nt)	-26.20(kcal/mol)
xxx-m0029	UUGAGAACAGCUGUUGGUUAAGCAAGGAGUAUGGUAACACAUUUUGUUGUAUAGUACCCAUUGCUGCCAAUCUCAACUCAG	NC_016409.2:43033313:43033393:-	81(nt)	-21.20(kcal/mol)
xxx-m0030	UUAAGACUCCAAAUCUAAUGCCAGCUGUCUUUCAGUGCUUAACUGCGAUCGUUCACAGGGCUUUUGAAACAGCUGUGUCAUGGAUGGUAGGUUUUA	NC_016409.2:54369451:54369546:-	96(nt)	-29.60(kcal/mol)
xxx-m0031	CAUGGUUAUUGUUGACCGCUCAUACGACCCCUACAAUUGCGUUGCAGCUUAUGCGGGGGGUCGUAUAAUGGUCAACAGAGACCCUUGA	NC_016410.2:16684431:16684518:+	88(nt)	-41.10(kcal/mol)
xxx-m0032	UAGCGCAGCUUGGUAGCGCGUUUGUUUUGGGUACAAAAUGUCACAGGUUCAAAUCCUGUCAUCCCUAUCCCUAACUAGUAGUUAUCGUAUCAGCAG	NC_016410.2:18053689:18053784:+	96(nt)	-20.30(kcal/mol)
xxx-m0033	ACAUGAACAAAGAUUCCAACAAGACUCUCAGAUGGUGCAAAGAUGGAGGGAAGCUCUAAUACAAGUCGCUGAUCUCUCUGGUUGGGAUCUACAUGA	NC_016410.2:31496488:31496583:+	96(nt)	-24.80(kcal/mol)
xxx-m0034	UUCAUCGACCGCAUCUGCUGCCACACCAUAUGCUAACAUUCGCAUUGAUGUGGUACAUUUUGCUAACGGUGAU	NC_016410.2:33605409:33605481:+	73(nt)	-24.10(kcal/mol)
xxx-m0035	CGGACCAAACCGGUCGUGGCUUCCACACAAAGCCUUUAAACAAAAGGCUUUGUGUGGAAGCCGCGGCUGGUUUGGUCCA	NC_016410.2:4925733:4925811:-	79(nt)	-71.30(kcal/mol)
xxx-m0039	AAGGGGGGCCUUAGGGGGCGGUUUUGUAGUUUUUUUUCUUAGGGGGCCAAAAUCGCAACUUGGGAAAGUUAGGGGGUUAAAACUGCUAUUAAGCCCUUAAU	NC_016410.2:49185565:49185665:-	101(nt)	-33.80(kcal/mol)
xxx-m0041	UGGGAGCUUUUAACUGGAGAGGUGAGCAUUUUUGUCUCAAGCAGCAAGCUUUGCUCUGCUUCAUCUUUUUAUUUGUUUCU	NC_016411.2:9209110:9209189:+	80(nt)	-20.90(kcal/mol)
xxx-m0042	GUAAGGAGUUUCAGUGCACGAUGUUUGCAGAGAACUUCAUUGUUAGAAACUCUAAAGCAAGUCUAUAAAUAUCGUGCACUGAAUCUCUUUUACA	NC_016411.2:15342296:15342389:+	94(nt)	-38.20(kcal/mol)
xxx-m0043	UUUGUCCAUAUGUGUUUCACUAGAUUUGCUUGCAAUUCGUGAUGAACAUCUGGAUCACGCAACUCGGAUCUAGCACACACUUGAUUUGC	NC_016411.2:25032753:25032841:+	89(nt)	-20.70(kcal/mol)
xxx-m0044	CCAUGGCUCCCUUCCUCCUUCUUCCUCGGCUCCUAUCACAGUGGCUACGGCCGGGUGGAUGUUGAAGCUCAGCCUGU	NC_016411.2:28309834:28309910:+	77(nt)	-22.60(kcal/mol)
xxx-m0048	AUGGCUGUGUCUUAACAGGUUGGGCUGUAGGGUACACUAAGCUGGCUUGCCCACUCCAAGUUGAGAGUUGGGCCAUG	NC_016411.2:38807414:38807490:+	77(nt)	-28.60(kcal/mol)
xxx-m0049	GCCAUAUGGGCUGAGAAUACUGCAGCCUGUGAUCCCUCCACUGUCAAGAGAAGGAAGUGUUCACUGCUCUGUGAAACCAGCCUCAUGCGGA	NC_016411.2:39310535:39310625:+	91(nt)	-26.70(kcal/mol)
xxx-m0051	UUGUCAACUGAGUCCAUGAUAUGAUCAUAAUAGUAUAGCGGUUGCGAACCGCUCCGCAAUUCGUGGUAGUGGUGUGGAAUCAGUUAGCGC	NC_016411.2:2327884:2327973:-	90(nt)	-30.30(kcal/mol)
xxx-m0053	CUUGCUUAUUACUCCCUUGCUGGACCAAGAGCAGAUUGUCCUGAUACUGUUAGACCUUUGCAUCCUGCUGCAGCAGCAGAUGGUGUUGACACGUAAGG	NC_016411.2:35093948:35094045:-	98(nt)	-23.60(kcal/mol)
xxx-m0055	UGCCCACUCCAAGUUGAGAGUUGGGCCAUGGGAUUUGGGCGAAGGCUCAGAUCUCCUGGUCACUAGAAUGGAGGGAUC	NC_016411.2:38865878:38865955:-	78(nt)	-33.30(kcal/mol)
xxx-m0056	CCUUGAAUUCUCUAAUCUCUGUUCCCAAUUACACUUAAUCCAUGAAAAGAUCAAGUGAGUUUGGGAUCAGAAAUUAGAGAUAUCAAUA	NC_016411.2:42295745:42295832:-	88(nt)	-33.90(kcal/mol)
xxx-m0058	ACUUUUGCAAAUCAUGUGCGUGCUAGAUCCGAGUUGCGUGAUCCAAAUGUUCAUCACGAAUUGCAAGCAGAUCUAGUGAAGCACAUAUGGACAAAGUU	NC_016412.2:17960829:17960926:+	98(nt)	-25.70(kcal/mol)
xxx-m0059	GUGUUUGGUAUCACGGUGGGUAUGCGAAAAUCACGGUGAUCCAUCGUGAUUCUGACAUAUCCACCGUGAUAUCAAACA	NC_016412.2:34197831:34197908:+	78(nt)	-49.10(kcal/mol)
xxx-m0061	ACAUGUAAACUAGUUAACAUAUUAUCGGAAUAAAGUUGAUGACAAUAUUUUUCGGAUUGGUGAUACGUUGACUAGCAUAGGUGG	NC_016412.2:12427744:12427827:-	84(nt)	-22.70(kcal/mol)
xxx-m0063	ACACACACAUUUCUUUUACCAUCAGGCGAGUGUAUGAUAACAUUGUAAGACGUUCAUAUGCUCCUUGGUUUAAAGAUUAACGGUGAAC	NC_016412.2:32633044:32633131:-	88(nt)	-21.60(kcal/mol)
xxx-m0065	GGGCAGCUUGCUUGACUGCUCGCUUAAGCGACGGAUGCUUCGCUUAAGCGACCAUUCGUCUGGACAGUGCAAAACCU	NC_016412.2:34640393:34640469:-	77(nt)	-28.70(kcal/mol)
xxx-m0066	CGGCAUAUGAUAGGCCAUAGGCAGGCUCAGGCUUGUGAUUUAUUUCGUAGACCAUACUCAGGCCUAUCAAAGUCUGACCUGACCUGACCUAUUCCCACCC	NC_016413.2:27595658:27595757:+	100(nt)	-30.40(kcal/mol)
xxx-m0067	UCACGCCGUUGCAUUUGGGUCAAUGGACCUGUGAUCAUAGGUGCAGGUCCAUCUGGUCUUGCAACGGCAGCA	NC_016413.2:39838972:39839043:+	72(nt)	-35.90(kcal/mol)
xxx-m0068	UACAUUUUUUAUUGAUUUGGAAGGACGUGGUCCUUUACCUACGUAUCCGUGAGGGAUCAAAACCUCGUAGUUCGUGGUAGAAAUUGAC	NC_016413.2:46298942:46299029:+	88(nt)	-23.50(kcal/mol)
xxx-m0069	CUUAAUGCUUUUGGGUCAUUUAAUCGGUUGGGAAAUCGUCGAUUAAACGAUCCAAUCGACUUUGUGAUUGUUUAAAUGUUUGAGA	NC_016413.2:3544591:3544675:-	85(nt)	-20.80(kcal/mol)
xxx-m0072	AUGGUCAUUGUUGACCGCUCAUACGACCCCUGCAAUUGUAUUGCAGUUUAUGCAGGGGUCGUAUAACGGUCAACAGAGACCUU	NC_016413.2:37998534:37998616:-	83(nt)	-51.10(kcal/mol)
xxx-m0074	UGGAAACUUUCAUUUGGAGAGACAUAGACAAAUGAAAUUAAAUGAUAAUUUAUUUCAAUGUCUAUCUCUCUCUAAAUGGAAGUGUCCAU	NC_016413.2:43956458:43956546:-	89(nt)	-42.80(kcal/mol)
xxx-m0076	CAUGGUCAUUGUUGACCGCUCAUACGACCCCUGCAAUUGCAUUGCAGCUUAUACGGGGGGUCGUAUAACGGUCAAUAGAGACCCUU	NC_016414.2:23421136:23421221:+	86(nt)	-41.70(kcal/mol)
xxx-m0078	GCUACUGAUAUCAUCUUAUUUUCUACGUUGCAAAGUGAAGCGUUUCACUUGGAACUGUAAUAUUAUUCACUUUGCAGGUUGAAAAUAAAAUGAUAUAAGUAG	NC_016414.2:34387161:34387262:+	102(nt)	-37.90(kcal/mol)
xxx-m0080	GUGUCUACGUGUGUUUUCGGUUGCGGUCAUCUGAAACGAUUCAACAUCUCUUUUUAUUGUGUCCUACUUUUGGUUCUAUUUGGCUGCUUGUGCGCGAGUGGAUUA	NC_016414.2:39482859:39482963:+	105(nt)	-22.80(kcal/mol)
xxx-m0082	UUCUUUUUUGGAUUCUGGGGUCCUCUUUUACUAUUAUUCUGAUUAUUAGAUUACAUUAGAGAAACCUUAGGAUCCACACAUUCC	NC_016414.2:3639066:3639149:-	84(nt)	-22.30(kcal/mol)
xxx-m0083	AAAAAGCUAGAAUCCGUUAAUCGAUCGAGAGAUUGCAGCUGUUACGCUUGGUUGAUGUCUCUGACCGCAAGCGGAAUAGCCCUAU	NC_016414.2:9067711:9067795:-	85(nt)	-25.60(kcal/mol)
xxx-m0084	UUAAAGCGCUCCUGAAGAAAUAGUGCUCCUGAAGUGAUGACGUCAUCAGAAGCAAGUUCAUCAGAAGCAAGUUUAUC	NC_016414.2:22674001:22674077:-	77(nt)	-20.90(kcal/mol)
xxx-m0087	CGGAUAGGUGAUCUGCUCGGCCUCGGACACGAAUUUCCUGACCCGCCCUUCGCGCGCGAUGUUGAGCCCGCCUGCCCCGA	NW_013655792.1:1076:1155:-	80(nt)	-26.10(kcal/mol)
xxx-m0088	AUCGUCGUGAUCAUGGUCGUGGUCGUGGUCGUGCCCAUGAUGAUGACCGUGCCCAUGACCAUGCCCGUGGUGAUGGCCGC	NW_013656059.1:1142:1221:-	80(nt)	-39.40(kcal/mol)
xxx-m0092	CGUUUAUAUUUAAGUCUCUUCGGCCCAUCGAAUCAAAGAUUUCAUCUUCAAAUCUCUGGACGAAGAAACUUAAAUAGGGGAA	NW_013657306.1:20708:20789:+	82(nt)	-21.00(kcal/mol)
xxx-m0094	AGCGGAGUCGGCGUUGUUGGAUGCUUCCAUAUGGCUGCAUGCCUCGGCAUUGUGGGGUGUGGGAUGUUCCGUGAUGUUGGUUUUUGCA	NW_013657494.1:13712:13799:+	88(nt)	-31.40(kcal/mol)
xxx-m0095	GAUUCGCACAAUUGGUCAUCGCGCUUGGUUGAAAAGCCAGUGGCGCGAAGCUACCGUGCGUUGG	NW_013657494.1:45266:45329:-	64(nt)	-26.10(kcal/mol)
xxx-m0096	GUUGAUUCGCACAAUUGGUCAUCGCGCUUGGUUGAAAAGCCAGUGGCGCGAAGCUACCGUGCGUUGGAUUAUG	NW_013657494.1:57985:58057:-	73(nt)	-26.70(kcal/mol)
xxx-m0099	CGCGACGGGGUAUUGUAAGUGGCAGAGUGGCCUUGCUGCCACGAUCCACUGAGAUUCAGCCCUUGUCGCU	NW_013657497.1:8896:8965:-	70(nt)	-31.90(kcal/mol)
xxx-m0101	UGCGAGGUGGGUAGUUUAUCUGGGGCGGAUGCCUCCUAAAGAGUAACGGAGGUGUGCGAAGGUAGGCUCAAGCUAAGAU	NW_013657516.1:7984:8062:+	79(nt)	-24.90(kcal/mol)
xxx-m0103	UUUUGCAGACGCGAGGGCAUGUGAGUGGUAGCGUGGAUGUUUGUGUUUGCUGGCUCAAUGCUUUGGCUUUGAACGG	NW_013657528.1:47745:47820:-	76(nt)	-23.70(kcal/mol)
		16
		57
		31
		12
		13
		55
		16
		11
		10
		11
		20
		18
		52
		17
		27
		45
		31
		56
		10
		17
		19
		209
		11
		28
		11
		11
		12
		10
		56
		11
		28
		19
		11
		24
		385
		10
		21
		11
		17
		12
		11
		266
		27
		18
		20
		244
		194
		10
		42
		21
		46
		42
		28
		35
		16
		11
		52
		15
		58
		130
		22

## Sheet: DL3
novel-id		chr-location	length	potential_energy	sequence	read-number
xxx-m0001	UCUUGGGAUCAAAGUCUAAAGCCGGUUGACUAUCAACCCGCCGUCUUUUGGGAACGUAUCACCGGUCUUAGGCAAUUUAAUACACG	NC_016407.2:8651254:8651339:+	86(nt)	-22.30(kcal/mol)
xxx-m0003	UUAAUGCAUUUGGGUCAUUUAAUCGGUUGGGAAAUCGUCGAUUAAACGAUCCAAUCGACUUUGUGAUUAUAUAAAUGUUUGGG	NC_016407.2:36084124:36084206:+	83(nt)	-21.60(kcal/mol)
xxx-m0004	UUCGAUGUAUUCAUCGACCGCAUCUGCUGCCACACCAUAUGCUAACAUUCACAUUGUUGUGGUACAUUUUGCUAACGGUGAUAUACCUUCUUU	NC_016407.2:51521457:51521549:+	93(nt)	-22.40(kcal/mol)
xxx-m0005	CAGGCAUUUCUCUGAUGGCUCUGACUUUGUCGGGAUCAACUUCAAUACCCUUUUGACUGACGAUAAAGCCUAGGAGUUUACCAGAUCUGA	NC_016407.2:22489162:22489251:-	90(nt)	-20.50(kcal/mol)
xxx-m0007	UGGUACUUCAUUUGGAGGCGCUGCUGGUAUGACUGGGUGGAUCAAUGGUGGAUCUACCGGAAAUGUACUUAUUGGUGCUGCAAGAGUACAA	NC_016408.2:17217095:17217185:+	91(nt)	-29.60(kcal/mol)
xxx-m0008	GCCUAUUUAAAAGCCUGGACUGGCCUGAAAGCCUACUUACAAGCCUACUUCACAUUAAGGUCAUCAAAUAGUUCAUUUGGCAUACUAAAUAGGUU	NC_016408.2:2994950:2995044:-	95(nt)	-23.20(kcal/mol)
xxx-m0009	GUGUAAUUAUAAGUGUCGUGUCGGUGUUUGACACGACACGUGUCAGACAUCGAGACACGUCUAAUUUAAG	NC_016408.2:5891733:5891802:-	70(nt)	-29.60(kcal/mol)
xxx-m0010	UAAUCAGUAAAGUAUAUUAUAUAGAUAAUGAAUACUGAUAAUGAGCUAAGUAACACAUUUAACUCCACAAUUAAAGGACUCGUUGUCUGUAUAAGCUGAAAG	NC_016408.2:30603084:30603185:-	102(nt)	-22.80(kcal/mol)
xxx-m0012	UGUCUUUGUAAUUGCCCAUCUUUCGGACGUACUUGAUGAUGUGGUUCUGGGGACAAGUUAGCCCGUUGUAUCGGUCGAAAUAUGGGAUUUUGAACUUCUUAGGGACAU	NC_016409.2:14447917:14448024:+	108(nt)	-25.40(kcal/mol)
xxx-m0014	ACUACCGUUGGAAAAACCGCCGGCAGUUAACUGCCGCUAGACCCAGCGGUUGUUAACUACCGCUGAAUUCCUUUCUUCAC	NC_016409.2:44809861:44809940:+	80(nt)	-25.70(kcal/mol)
xxx-m0015	AAUAUUAGCGAAUUCCGGUUUUAGUCCCUGUAAAAAUCUAAAUCUUUUUUUUACAGGGACUAAAACCGAAAUUCGCUAAUAUUA	NC_016409.2:27946134:27946217:-	84(nt)	-49.90(kcal/mol)
xxx-m0016	UUGAGAACAGCUGUUGGUUAAGCAAGGAGUAUGGUAACACAUUUUGUUGUAUAGUACCCAUUGCUGCCAAUCUCAACUCAG	NC_016409.2:43033313:43033393:-	81(nt)	-21.20(kcal/mol)
xxx-m0017	CAUCAUUUGAAAAUGGAGUGUCCAGUAGUUGAAUCAUAUCUAGCACUCGAGAUUCGACUCUAACUGGAUGGUCAGCAAUGAAC	NC_016410.2:4135706:4135788:+	83(nt)	-22.50(kcal/mol)
xxx-m0019	ACAUGAACAAAGAUUCCAACAAGACUCUCAGAUGGUGCAAAGAUGGAGGGAAGCUCUAAUACAAGUCGCUGAUCUCUCUGGUUGGGAUCUACAUGA	NC_016410.2:31496488:31496583:+	96(nt)	-24.80(kcal/mol)
xxx-m0020	UGCAAAGGAUACUACAUGUUAGUGAAAUGCGCGGGUUCCCAUGAAUGAUCGGGAGUAUUGACUGCAUGCACUGGGAGUGGAAAAAUUGU	NC_016410.2:28446050:28446138:-	89(nt)	-20.50(kcal/mol)
xxx-m0022	CCAUGGCUCCCUUCCUCCUUCUUCCUCGGCUCCUAUCACAGUGGCUACGGCCGGGUGGAUGUUGAAGCUCAGCCUGU	NC_016411.2:28309834:28309910:+	77(nt)	-22.60(kcal/mol)
xxx-m0023	AAAAGCUAGAAUCCGUUAAUCGAUCGAGAGAUUGCAGCUGACGCUUGGUUGAUGUCUCUGACCGCAAGCGGAAUAGCCCUA	NC_016411.2:31846487:31846567:+	81(nt)	-26.00(kcal/mol)
xxx-m0026	GCCAUACGGGCUGAGAAUACAGCAGCCUGUGAUCCCUCCACUGUCAAGAGAAGGAAGUGUUCACUGCUCUGUGAAACCAGCCUCAUGCGGA	NC_016411.2:38848803:38848893:+	91(nt)	-27.00(kcal/mol)
xxx-m0028	UUGGUGGUUUAAUUAGAAGAGGUGAUGAAGUUGUGUAAUUUGAUUGCAGCUUUCUAGUUGUUGCCACUA	NC_016411.2:1515213:1515281:-	69(nt)	-23.30(kcal/mol)
xxx-m0029	UUGUCAACUGAGUCCAUGAUAUGAUCAUAAUAGUAUAGCGGUUGCGAACCGCUCCGCAAUUCGUGGUAGUGGUGUGGAAUCAGUUAGCGC	NC_016411.2:2327884:2327973:-	90(nt)	-30.30(kcal/mol)
xxx-m0030	UUAAAGAGAGCGAGCUCUGGGCUUUACCGCAUGAGAAUUCUAUUUUCCCAGCUCUAAGGUUGAGCUACUUUCAUUUAU	NC_016411.2:17983294:17983371:-	78(nt)	-20.90(kcal/mol)
xxx-m0031	ACCGGAGUCUCUGGGGAAGUCGGAAUAGGAGAGCACUCAUCUUGGGGUGGGCUUACUACUUAGAUGCUUUCAGCAGUUAUCCGCU	NC_016411.2:34660322:34660406:-	85(nt)	-23.20(kcal/mol)
xxx-m0033	CCUUGAAUUCUCUAAUCUCUGUUCCCAAUUACACUUAAUCCAUGAAAAGAUCAAGUGAGUUUGGGAUCAGAAAUUAGAGAUAUCAAUA	NC_016411.2:42295745:42295832:-	88(nt)	-33.90(kcal/mol)
xxx-m0034	GGGCAUUAUGGACAUUUCACGCGUGGUCAGUUUCUUUAAGGGCAAAAAUGUCAUUGCAAUUGCCAUCUGCUGACGUGUCCUGACAAAAAGCCA	NC_016412.2:17784225:17784317:+	93(nt)	-24.00(kcal/mol)
xxx-m0036	UCAUCGACUGCAUCUGCUGCCACACCAUAUGCUAACAUUCGCAUUGCUGUGGUACAUUUUGCUAACGGUAA	NC_016412.2:24931986:24932056:-	71(nt)	-20.20(kcal/mol)
xxx-m0037	GACACACACAUUUCUUUUACCAUCAGGCGAGUGUAUGAUAACAUUGUAAGACGUUCAUAUGCUCCUUGGUUUAAAGAUUAACGGUGAACC	NC_016412.2:32633043:32633132:-	90(nt)	-21.60(kcal/mol)
xxx-m0038	UUCUGUCCCCAAAGAGCAAGUUCCAAACGCUCCACCAAGGAGACGUGGACGUGGACGUGGUCGUGGGCGUGGUCGGAG	NC_016412.2:32689696:32689773:-	78(nt)	-24.30(kcal/mol)
xxx-m0040	CGGCAUAUGAUAGGCCAUAGGCAGGCUCAGGCUUGUGAUUUAUUUCGUAGACCAUACUCAGGCCUAUCAAAGUCUGACCUGACCUGACCUAUUCCCACCC	NC_016413.2:27595658:27595757:+	100(nt)	-30.40(kcal/mol)
xxx-m0041	AGUGGGGGCAACAAUGUGGUGGAACAUGGCUUAGGAUUUGCCAGGUUGGGUUAGUGGCUGCACCAUGCUGGCCUGCCCACUC	NC_016413.2:37147500:37147581:+	82(nt)	-26.30(kcal/mol)
xxx-m0042	CAUGGUCAUUGUUGACCGCUCAUACGACCCCUGCAAUUGCAUUGCAGCUUAUGCGAGUGUCGUAUAACGGUCAAUAGAGACCCUUGA	NC_016413.2:38257620:38257706:+	87(nt)	-35.40(kcal/mol)
xxx-m0043	UCACGCCGUUGCAUUUGGGUCAAUGGACCUGUGAUCAUAGGUGCAGGUCCAUCUGGUCUUGCAACGGCAGCA	NC_016413.2:39838972:39839043:+	72(nt)	-35.90(kcal/mol)
xxx-m0044	AAAGAAUACCACAUGUUAGUGAAAUGUGGGGGUUCUCAGGGAUGAUCGAGAGUAUUGACUGCAUGCACUGGGAGUGGAAAAAUUG	NC_016413.2:40301398:40301482:+	85(nt)	-20.90(kcal/mol)
xxx-m0045	GCUCACUCUUUGUCUGGUCUCUCUGAUAGUGACUGUUGGUUGUUGUUCAAACAACAUGCAUUUAGACAUUACAGAGAAGAGCAUACAAAGCUUGUGGAA	NC_016413.2:26707900:26707998:-	99(nt)	-34.20(kcal/mol)
xxx-m0046	UGGAAACUUUCAUUUGGAGAGACAUAGACAAAUGAAAUUAAAUGAUAAUUUAUUUCAAUGUCUAUCUCUCUCUAAAUGGAAGUGUCCAU	NC_016413.2:43956458:43956546:-	89(nt)	-42.80(kcal/mol)
xxx-m0047	GAGAGCUUGUAUUUCCCACAGACGGCGCCACUGAUCGUACCUGACCAGAAGGUGGCUGUCGGCGCUGGGUUAAAUGCAGUGGUUCAC	NC_016414.2:15612680:15612766:+	87(nt)	-30.90(kcal/mol)
xxx-m0048	UAGCGCAGCUUGGUAGCGCGUUUGUUUUGGGUACAAAAUGUCACAGGUUCAAAUCCUGUCAUCCCUAUCCCUAACUAGUAGUUAUCGUAUCAGCAG	NC_016414.2:17652459:17652554:+	96(nt)	-20.30(kcal/mol)
xxx-m0050	GUGUCUACGUGUGUUUUCGGUUGCGGUCAUCUGAAACGAUUCAACAUCUCUUUUUAUUGUGUCCUACUUUUGGUUCUAUUUGGCUGCUUGUGCGCGAGUGGAUUA	NC_016414.2:39482859:39482963:+	105(nt)	-22.80(kcal/mol)
xxx-m0052	CAACGCCUCCUUUUGAGAUUGCAACUCCUGGUUCAUUUGUUGUAUCAUUGCUUGCAUCUCAAGAGGCAGCUCUC	NC_016414.2:18765778:18765851:-	74(nt)	-24.40(kcal/mol)
xxx-m0055	AUGGUCAUUGUUGACCGCUCAUACGACCCCUGCAAUUGCAUUGCAACUUAUGCGGGGGUCGUAUAACGGUCAAUAAAGACUCU	NC_016414.2:42190412:42190494:-	83(nt)	-45.10(kcal/mol)
xxx-m0056	CGGAUAGGUGAUCUGCUCGGCCUCGGACACGAAUUUCCUGACCCGCCCUUCGCGCGCGAUGUUGAGCCCGCCUGCCCCGA	NW_013655792.1:1076:1155:-	80(nt)	-26.10(kcal/mol)
xxx-m0058	GAUUCACAUAAUUGGUCAUCGCGCUUGGUUGAAAAGCCAGUAGCGUGAAAAUACCGUACGUUGGAUUA	NW_013657157.1:13213:13280:+	68(nt)	-20.60(kcal/mol)
xxx-m0059	ACGCUUGUGAUGAGACCUCAGGUCAGGCGGGGCUACCCGCUGAAUUUAAGCAUAUCAAUAAGCGG	NW_013657397.1:26183:26247:+	65(nt)	-25.30(kcal/mol)
xxx-m0060	ACUUCCCUUGCCUACAUUGUUCCAUCGACCAGAGGCUGUUCACCUUGGAGACCUGAUGCGGUUAUGAGUACGACCGGGCAUGGAAGG	NW_013657494.1:47865:47951:+	87(nt)	-25.30(kcal/mol)
xxx-m0061	CGUUGAUUCGCACAAUUGGUCAUCGCGCUUGGUUGAAAAGCCAGUGGCGCGAAGCUACCGUGCGUUGGAUUAUGA	NW_013657494.1:76674:76748:-	75(nt)	-26.70(kcal/mol)
xxx-m0064	GUUGGACAUUGGGUUGGGUCGAUCGGUCCGCCUAUGAGUGUGCACCGGUCGGCUUGUCCCCUUAACCGCAGCA	NW_013657497.1:18522:18594:-	73(nt)	-29.90(kcal/mol)
xxx-m0065	UGAGUGGUAGCGUGGAUGUUUGUGUUUGCUGGCUCAAUGCUUUGGCUUUGAACGGUUUGCAUAUGAUCCUGAUCAUUUU	NW_013657497.1:19579:19657:-	79(nt)	-20.60(kcal/mol)
xxx-m0068	AAUCGAACCGUCUAGUAGCUGGUUCCCUCCGAAUUUUCCCUCAGGAUAGCUGGAGCCCGAGGGCGAGUUUUAUCGGGCAAAGCCAAUGAUUAGAGGCAUCGGGG	NW_013657528.1:41166:41269:-	104(nt)	-32.10(kcal/mol)
xxx-m0069	UCCAGUGGCUGGAAGAGCACCGCACGUCACGUGGAGUCCGGUGCGCCCCUGGCGGCCCUUUAAAAUCCGGAGGACCGAGUGCCUUCCUUGCCCGG	NW_013657528.1:88842:88936:-	95(nt)	-35.40(kcal/mol)
xxx-m0070	UGCCCAGUGCCGGAAGGUUAAGGAAGUUGGUGACCUGAUGACAGGGAAGCCGGCGACCGAAGCCCCGGUGAACGGC	NW_013657547.1:183025:183100:-	76(nt)	-34.30(kcal/mol)
		18
		14
		10
		21
		14
		11
		27
		18
		13
		11
		11
		52
		62
		264
		20
		16
		21
		11
		17
		12
		101
		12
		285
		22
		13
		20
		77
		17
		12
		22
		226
		23
		79
		155
		11
		19
		36
		11
		111
		37
		22
		726
		11
		52
		13
		18
		77
		20
		28

## Sheet: DR1
novel-id		chr-location	length	potential_energy	sequence	read-number
xxx-m0001	CGGGGUUUGAAUUAGGUGCAGCGCAGUGUGACUGCACACUCGUGCAUCUCGAUCGUUUGAUCUUGG	NC_016407.2:7362322:7362387:+	66(nt)	-24.10(kcal/mol)
xxx-m0005	UAGUAUGUUCCAAGGGUUGGGCUGUUCGCCCAUUAAAGCGGUGCGUGAGCUCGGUUCAGAACGUCGUGA	NC_016408.2:424744:424812:-	69(nt)	-20.60(kcal/mol)
xxx-m0006	GAGUAAUCCAGGCUAGAGUUCGGUAGGAAGAUAAGUAAAUUCUGCCCAAAGAUUGUUCCAACCAAGAAUGUUCUGGCCCAGAAUAUUUC	NC_016408.2:2403218:2403306:-	89(nt)	-21.80(kcal/mol)
xxx-m0007	GCAAGAGUGUGGCGUUUCUCUAAUAUCUUCCUCUUUGAUUCAGUUAACGAAGGGGAUGUAGCUGAAUUUCGUCUCACAGACAU	NC_016408.2:4907664:4907746:-	83(nt)	-20.50(kcal/mol)
xxx-m0009	CAACAUUUUGAUAUGAGGGCGUGGGCUUGUGUGUCUGAGGAUUUUGAUAUUUUGAGAGUAACCAAGUCUCUCCUUGAAUCGGUCACUUC	NC_016409.2:9849775:9849863:+	89(nt)	-21.20(kcal/mol)
xxx-m0010	CAUGGUCAUUGUUGACCGCUCAUACGACCCCUGCAAUUGCAUUGCAGCUUAUGCGGGGGUCGUAUAACGGUCAACAGAGACCCUU	NC_016409.2:21980086:21980170:+	85(nt)	-50.90(kcal/mol)
xxx-m0014	CAUCAUUUGAAAAUGGAGUGUCCAGUAGUUGAAUCAUAUCUAGCACUCGAGAUUCGACUCUAACUGGAUGGUCAGCAAUGAAC	NC_016410.2:4135706:4135788:+	83(nt)	-22.50(kcal/mol)
xxx-m0015	CUCUUGGGUUCAAUGGAGAAAGUACAAUACCUAAAUUAUUAAGUCUUGUGACAUGGUCGGUAUCACUGGUGUCAAUGAUCCAAGGA	NC_016410.2:23429019:23429104:+	86(nt)	-20.70(kcal/mol)
xxx-m0016	UUUGGAUUUCUUCCGUCAUCAAAUGAACCUUGGAGGUCAAGGAGUCUCAACUAUUGUGGAGCUGUUCUCUAAGGUUCGUUGGAUGGCGGAAGAAUUCCAA	NC_016410.2:29723694:29723793:+	100(nt)	-54.40(kcal/mol)
xxx-m0019	AAGGCUUCCGGUGGUGAUGGAGAUGAGGAGGAUGAAGAUUAAAUAAUUAACUUACAAAUUCUCUUGAUUUUGGUCAUCCUGGUCGCGUG	NC_016410.2:44927035:44927123:-	89(nt)	-31.90(kcal/mol)
xxx-m0021	GUGUGGGCCUUCCGUGGGCUAUAAUCCAGAAGCCAUGGGCUCGAGAGAUGCUGUGCUUGGCGGGCUUGUGGGCUUAGGUGGGCCUUUUA	NC_016411.2:33327746:33327834:+	89(nt)	-33.40(kcal/mol)
xxx-m0022	CAAAUAUUUACCAUGGCUGUAACACUGAAACACUGACCAAUUUUGGAUUUGUGGACAGUGUAUGGUGGGGUGAGGGCAAU	NC_016411.2:36814533:36814612:+	80(nt)	-23.20(kcal/mol)
xxx-m0025	UGGCUGGUUUGCUUAGCGGGUUGGGCUGUAGGGUACACUAUGCUGGCCUGCCCACUCCAAGUUGAGAGUUGGGCCAU	NC_016411.2:38865927:38866003:-	77(nt)	-28.40(kcal/mol)
xxx-m0026	CCUUGAAUUCUCUAAUCUCUGUUCCCAAUUACACUUAAUCCAUGAAAAGAUCAAGUGAGUUUGGGAUCAGAAAUUAGAGAUAUCAAUA	NC_016411.2:42295745:42295832:-	88(nt)	-33.90(kcal/mol)
xxx-m0027	UGUCUUUGUAAUUGCCCAUCUUUCGGACGUACUUGAUGAUGUGGUUCUGGGGACAAGUCAGCCCGUUGUAUCGGUCGAAAUCUGGGAUUUUGAACUUCUUAGGGACAU	NC_016412.2:15425219:15425326:+	108(nt)	-24.40(kcal/mol)
xxx-m0028	CCAGCAAGCAUCUGACGAGGUUGAGGACCAUCGGGAUGACCCUUCUGCAUCACCAUCUUAGUAUUCACCACCUUAACAGUUAGAGUGUGGGCAUU	NC_016412.2:20603621:20603715:+	95(nt)	-22.30(kcal/mol)
xxx-m0029	UCAAAAUUCAUACGAGUCUCACCAAAUCAUGUGGGGCCAUAUAAAUUUGGUGGGAUCAAUGUGAAUUUUAA	NC_016412.2:479837:479907:-	71(nt)	-26.30(kcal/mol)
xxx-m0033	ACGCCGUUGCAUUUGGGUCAAUGGACCUGUGAUCAUAGGUGCAGGUCCAUCUGGUCUUGCAACGGCAG	NC_016413.2:39838974:39839041:+	68(nt)	-35.90(kcal/mol)
xxx-m0036	CACUCCGUUGCAUUUAGUUCAGUGGACGUGUGAUCAUAUGUGCAAGUCCAUCUGACCUAGCGACGACAAC	NC_016413.2:31290770:31290839:-	70(nt)	-23.60(kcal/mol)
xxx-m0037	UGGAAACUUUCAUUUGGAGAGACAUAGACAAAUGAAAUUAAAUGAUAAUUUAUUUCAAUGUCUAUCUCUCUCUAAAUGGAAGUGUCCAU	NC_016413.2:43956458:43956546:-	89(nt)	-42.80(kcal/mol)
xxx-m0039	AGGACCUUAGACUUCUGAAACUUGAUCGUGUUGACCUCACUGGAGAUUAUGGUUACCUUUCUAAAGAACUGAGGUGGGUCCA	NC_016414.2:13786891:13786972:+	82(nt)	-22.00(kcal/mol)
xxx-m0047	GCCUGAACUGUUGCUGUUGACCGUCGACGUCGCGCUCGCCGCGCCGAGCGUCACAUCGCCCUUGGCGGCGAUCGUCCCGCCCUGGCC	NW_013656574.1:2256:2342:+	87(nt)	-29.80(kcal/mol)
xxx-m0048	UAGCUGUUAGUCAUUGUUGCUGCUGCAGUAGGUGUGUGUAUUGCUGCUUGCAUUUUUAGCUGCAGUGUUGCGUGGAAGAAGUCU	NW_013656775.1:4538:4621:+	84(nt)	-22.20(kcal/mol)
xxx-m0051	UGUUGAGCCGUGCCAUGGAAUCGAGAGCUCCAAGUGGGCCAUUUUUGGAAAGCAGAAUUGGCGAUGCGGGAUGAACCGAAAGCUGGGUUACGGUGCCCAACU	NW_013657494.1:30323:30424:-	102(nt)	-32.00(kcal/mol)
xxx-m0052	GGUGGCCGAAGCCUGGGUUGUUGAAAUGCUCGCGGAGAUGUCAUCAUCACGAUUGUGGUGUCGGCCUGU	NW_013657494.1:30849:30917:-	69(nt)	-22.60(kcal/mol)
xxx-m0053	UGCAUGGCCGUUCUUAGUUGGUGGAGCGAUUUGUCUGGUUAAUUCCGUUAACGAACGAGACCUCAGCCUGCUAAAUAGCUAUGU	NW_013657494.1:69298:69381:-	84(nt)	-25.50(kcal/mol)
xxx-m0054	GUUGAUUCGCACAAUUGGUCAUCGCGCUUGGUUGAAAAGCCAGUGGCGCGAAGCUACCGUGCGUUGGAUUAUG	NW_013657497.1:39574:39646:+	73(nt)	-26.70(kcal/mol)
xxx-m0057	GUUCCGGGGGGAGUAUGGUCGCAAGGCUGAAACUUAAAGGAAUUGACGGAAGGGCACCACCAGGAGUGGAGCCUGCGGCUUAAUUUGACUCAACAC	NW_013657497.1:25526:25621:-	96(nt)	-25.90(kcal/mol)
xxx-m0059	GCAUGGCCGUUCUUAGUUGGUGGAGCGAUUUGUCUGGUUAAUUCCGUUAACGAACGAGACCUCAGCCUGCUAAAUAGCUAUG	NW_013657497.1:47751:47832:-	82(nt)	-23.50(kcal/mol)
xxx-m0060	CCGGGGGGAGUAUGGUCGCAAGGCUGAAACUUAAAGGAAUUGACGGAAGGGCACCACCAGGAGUGGAGCCUGCGGCUUAAUUUGACUCAA	NW_013657497.1:47911:48000:-	90(nt)	-25.90(kcal/mol)
xxx-m0063	UGCGAGGUGGGUAGUUUAUCUGGGGCGGAUGCCUCCUAAAGAGUAACGGAGGUGUGCGAAGGUAGGCUCAAGCUAAGAU	NW_013657516.1:7984:8062:+	79(nt)	-24.90(kcal/mol)
		20
		40
		11
		126
		13
		59
		15
		41
		10
		31
		38
		26
		24
		29
		11
		61
		10
		38
		285
		87
		12
		11
		10
		19
		11
		17
		194
		13
		27
		13
		1418

## Sheet: DR2
novel-id		chr-location	length	potential_energy	sequence	read-number
xxx-m0004	AAGUUGUGGUUUGCAAUGAACGGCUAGGAUGCAAAGGAGUUAUCAGAUUUUACGCAUAUGGAUCGAUUCAUUGUUUUAAUGAUACGAUUC	NC_016407.2:22849330:22849419:+	90(nt)	-20.00(kcal/mol)
xxx-m0005	ACUUAAUGCAUUUGGGUCAUUUAAUCGGUUGGGAAAUCGUCGAUUAAACGAUCCAAUCGACUUUGUGAUUAUAUAAAUGUUUGGGA	NC_016407.2:36084122:36084207:+	86(nt)	-24.00(kcal/mol)
xxx-m0008	GGGUGUAGGAAGGUGGUUUGAUGAUAAAUGUAGGUCAGAGGUGAGAGCCGGUGUUUCAACCUUAUUUUGGUGGGAUCAGUUGCUACACAA	NC_016408.2:15522315:15522404:+	90(nt)	-24.80(kcal/mol)
xxx-m0009	CUAGGAACCACAUUAUUUUCCGGAAUGAGGUGAAAUACGUUGACGAAUUAUUACCGGAAAUAAAUGUGAUGUCGUGGC	NC_016408.2:18233372:18233449:+	78(nt)	-21.60(kcal/mol)
xxx-m0010	UGGCCGCUUUCCACUUCUGACACACGCCGACGCGGCCUGGUGCGGUGGUAUUGAUUUUUCCGCUCCGCUCUGGUGUAGCGGCCGGCGCGGCC	NC_016408.2:29395641:29395732:+	92(nt)	-35.30(kcal/mol)
xxx-m0011	GUAGUAUGUUCCAAGGGUUGGGCUGUUCGCCCAUUAAAGCGGUGCGUGAGCUCGGUUCAGAACGUCGUGA	NC_016408.2:424744:424813:-	70(nt)	-20.60(kcal/mol)
xxx-m0012	GCAAGAGUGUGGCGUUUCUCUAAUAUCUUCCUCUUUGAUUCAGUUAACGAAGGGGAUGUAGCUGAAUUUCGUCUCACAGACAU	NC_016408.2:4907664:4907746:-	83(nt)	-20.50(kcal/mol)
xxx-m0015	CAACAUUUUGAUAUGAGGGCGUGGGCUUGUGUGUCUGAGGAUUUUGAUAUUUUGAGAGUAACCAAGUCUCUCCUUGAAUCGGUCACUUC	NC_016409.2:9838897:9838985:+	89(nt)	-21.20(kcal/mol)
xxx-m0016	UAUUUGGGUUGGCCUGGUGGUAUUGACGUAGAAUCCUCGAGGUCUCAGGUUCAAUUUUCUCUACUGUCAAUUUAGGUGGGCUAAUUUAGCUU	NC_016409.2:13448343:13448434:+	92(nt)	-26.10(kcal/mol)
xxx-m0017	UGAUGCAGCAUGUGGAUCACUCGGCCGGGGAUCUUCUUGAUCUCUUGCAGGGUCUACUUCGGUUUGAUCCCAUGAGCAGGA	NC_016409.2:39211693:39211773:+	81(nt)	-28.10(kcal/mol)
xxx-m0019	CAUGGUCAUUGUUGACCGCUCAUACGACCCCUGCAAUUGCAUUGCAGCUUAUGCGGGGGUCGUAUAACGGUCAACAGAGACCCUUGA	NC_016409.2:49327501:49327587:+	87(nt)	-51.10(kcal/mol)
xxx-m0020	AGACCUUGUGUGUGCUCCAGCCAGACUUUGAGCCUCAUCCCAAAGCUGUUUGGAGGUCUCACAAUGCAG	NC_016409.2:490045:490113:-	69(nt)	-21.70(kcal/mol)
xxx-m0021	GUCAUGUUGACUUUAGAGUGGGUCGCUUGGAAGCCAAUUUUGCAAGUGAGUUUGGAAACAGAGCGGCGAGAUUUAGAGGCAGUGGAUGAUG	NC_016409.2:1026419:1026509:-	91(nt)	-25.60(kcal/mol)
xxx-m0022	UUGAGAACAGCUGUUGGUUAAGCAAGGAGUAUGGUAACACAUUUUGUUGUAUAGUACCCAUUGCUGCCAAUCUCAACUCAG	NC_016409.2:43033313:43033393:-	81(nt)	-21.20(kcal/mol)
xxx-m0024	AGCGGAAUUGUCUCGUGGUUGGUUGACUGAGGGGUUCUGCUCAUAAUCCUCCUCUUGUUCGGCUGGCAUUGGGUGUUCCUGUUA	NC_016410.2:2488733:2488816:+	84(nt)	-24.90(kcal/mol)
xxx-m0025	UUUGGAUUUCUUCCGUCAUCAAAUGAACCUUGGAGGUCAAGGAGUCUCAACUAUUGUGGAGCUGUUCUCUAAGGUUCGUUGGAUGGCGGAAGAAUUCCAA	NC_016410.2:29723694:29723793:+	100(nt)	-54.40(kcal/mol)
xxx-m0027	ACCAGGCCCGGGCGACUGUUUAUCAAAAACACAGGUCUUCGCAAAGUCGUAAGACCAUGUAUGGGGGCUGACGUCUGUCCAGUGCCGGA	NC_016410.2:50525874:50525962:+	89(nt)	-26.60(kcal/mol)
xxx-m0028	AAAGUAAUGUCCGGCCUGGUCACUGUGAGGUAAUUAAGUUUUCCAACUAGACGUCGAUAUUGACCAGGGUCGUUCAAAGGCUCC	NC_016410.2:34611167:34611250:-	84(nt)	-23.30(kcal/mol)
xxx-m0029	AAGGCUUCCGGUGGUGAUGGAGAUGAGGAGGAUGAAGAUUAAAUAAUUAACUUACAAAUUCUCUUGAUUUUGGUCAUCCUGGUCGCGUG	NC_016410.2:44927035:44927123:-	89(nt)	-31.90(kcal/mol)
xxx-m0031	AGCGAGCAAGGCUUCGGAGGCGUGUGUGCGAUCAGACUGUGAAAGUGUGAAGAAAAUAUGAUGGUUGUGAAGUGUUUAUGCAUGGUG	NC_016411.2:16552584:16552670:+	87(nt)	-22.10(kcal/mol)
xxx-m0032	AGUGUGGGCCUUCCGUGGGCUAUAAUCCAGAAGCCAUGGGCUCGAGAGAUGCUGUGCUUGGCGGGCUUGUGGGCUUAGGUGGGCCUUUUAG	NC_016411.2:33327745:33327835:+	91(nt)	-33.40(kcal/mol)
xxx-m0033	CGAUGCAAGGGUGGAGUGGCGUAUCUUGCAGAAACUGGACACUUUGGUGGCAAUAAUUCUCAAAGCAAGAUACUUUCUUCACACAUAUUUUUUCUUGAAGCU	NC_016411.2:34228820:34228921:+	102(nt)	-23.20(kcal/mol)
xxx-m0035	AUACUAAAGUAUAGGAUUGAGAUCUGGGGAGUGUGCUUCUUCUGAAGGUCUCAGAUUCGAUUCUCUCUGGUGUC	NC_016411.2:5156114:5156187:-	74(nt)	-20.90(kcal/mol)
xxx-m0036	UUGGUCGCGGCAUCCGAAGCUGCAGCUGCAUUGGUAGUGGCAUCCGUAGUAGCAGAAGGUGCAGCUGCAUUGGUCGCGGCAUCCGAA	NC_016411.2:32014758:32014844:-	87(nt)	-37.60(kcal/mol)
xxx-m0037	CCUUGAAUUCUCUAAUCUCUGUUCCCAAUUACACUUAAUCCAUGAAAAGAUCAAGUGAGUUUGGGAUCAGAAAUUAGAGAUAUCAAUA	NC_016411.2:42295745:42295832:-	88(nt)	-33.90(kcal/mol)
xxx-m0038	UGGGCCUAAUGGGAAGUGCAUAUGGCACAAGACUUGGAGGUGCUGCUGUUGAUUAUGUGCCCGUGCCUGCUUGCUAUUGGCAAU	NC_016412.2:9722572:9722655:+	84(nt)	-28.30(kcal/mol)
xxx-m0039	CCAGCAAGCAUCUGACGAGGUUGAGGACCAUCGGGAUGACCCUUCUGCAUCACCAUCUUAGUAUUCACCACCUUAACAGUUAGAGUGUGGGCAUU	NC_016412.2:20603621:20603715:+	95(nt)	-22.30(kcal/mol)
xxx-m0041	UUCUGAAUUUGAUUCAGCUUCUGGACUCUCUUCAAUGUUGAGUGUUAGAUCAGAUUCUGAUGCAUCUUCAGAAU	NC_016412.2:14063827:14063900:-	74(nt)	-23.90(kcal/mol)
xxx-m0043	GCUUGCCUCUGAAUAGGAAGUGUGGUUCUGAAGUCUGUUCAGAAGCUAUGGUCCAUCAGAAGCUCUU	NC_016412.2:22380613:22380679:-	67(nt)	-21.30(kcal/mol)
xxx-m0045	UCACGCCGUUGCAUUUGGGUCAAUGGACCUGUGAUCAUAGGUGCAGGUCCAUCUGGUCUUGCAACGGCAGCA	NC_016413.2:39838972:39839043:+	72(nt)	-35.90(kcal/mol)
xxx-m0048	AAAUUAGGCAUACUGGUAGUUUGUAAUUCAGUUCAUGGUAGUGAAAUCUACCCUAUUAAUUAAAGAUUGCUAGCCUUACCGGUGUAAAUGUUAG	NC_016413.2:43832860:43832953:-	94(nt)	-20.80(kcal/mol)
xxx-m0049	UGGAAACUUUCAUUUGGAGAGACAUAGACAAAUGAAAUUAAAUGAUAAUUUAUUUCAAUGUCUAUCUCUCUCUAAAUGGAAGUGUCCAU	NC_016413.2:43956458:43956546:-	89(nt)	-42.80(kcal/mol)
xxx-m0051	ACAUUACGUGAGUUAACUCACGCAACCAGCCAAAGGUGGGUGACUUAACUUACGCCACCGUCCAAAGGCGCUUGAGUUAACUCACGUUGCAUGC	NC_016414.2:5459991:5460084:+	94(nt)	-39.10(kcal/mol)
xxx-m0053	GGUCGCGAUGGGCCGCCGUAUGCGCACCGUGAUCGUGAUGCUCAUCGUCGUGAUCAUGGUCGUGGUCGUGGUCGUGCCCAUGAUGAU	NW_013656059.1:1178:1264:-	87(nt)	-41.00(kcal/mol)
xxx-m0054	CGAUGAUCGGAAAGUGGGUGCGCUGGAUGGCCUCCGGAUCACCAUCGGGCCACGUGUUCACUGCAUGCUCGUACGC	NW_013656681.1:2594:2669:+	76(nt)	-23.30(kcal/mol)
xxx-m0055	CCGGCAUCGCGGUCGCAGCGAUGCUCGCGCUGAGCGUCGGACGACUCGCGCGCCGGC	NW_013656704.1:1:57:+	57(nt)	-34.60(kcal/mol)
xxx-m0056	UAGCUGUUAGUCAUUGUUGCUGCUGCAGUAGGUGUGUGUAUUGCUGCUUGCAUUUUUAGCUGCAGUGUUGCGUGGAAGAAGUCU	NW_013656775.1:4538:4621:+	84(nt)	-22.20(kcal/mol)
xxx-m0058	AGAUCAAUAUUGUUCUCGGAUGGAUUUUAGUGUUGUUGUUUAAAAACAACAAGCACUUUGUCAUUUCAGCUAGAGCAUGUAAUUUUAUAGUUUGGUUUA	NW_013657219.1:19708:19806:+	99(nt)	-20.80(kcal/mol)
xxx-m0059	ACGCUUGUGAUGAGACCUCAGGUCAGGCGGGGCUACCCGCUGAAUUUAAGCGUAUCAAUAAGCGG	NW_013657243.1:8572:8636:+	65(nt)	-26.40(kcal/mol)
xxx-m0060	UCGGGGGAGCAACGCCCUCGACCUAUUCUCAAACUUUAAAUAGGUAGGAUGGUGUGGCUGCUCUGU	NW_013657494.1:27183:27248:+	66(nt)	-26.70(kcal/mol)
xxx-m0061	CCCUUGUAACGCUGCGGGGCGACUAGCAUUUGCUUACGCAGUGCAGGUCAAUAAACAUAGCCGUGUUGGUCCCUCCUCGGAAAAAAUUGUG	NW_013657494.1:52923:53013:-	91(nt)	-21.90(kcal/mol)
xxx-m0062	UGCAUGGCCGUUCUUAGUUGGUGGAGCGAUUUGUCUGGUUAAUUCCGUUAACGAACGAGACCUCAGCCUGCUAAAUAGCUAUGU	NW_013657494.1:66466:66549:-	84(nt)	-25.50(kcal/mol)
xxx-m0063	GCAUCGGGGGCGCAACACCCUCGACCUAUUCUCAAAUUUUAAAUAGGUAGGACGGUGUGGCUGAUCUGUUGA	NW_013657497.1:65575:65646:+	72(nt)	-21.70(kcal/mol)
xxx-m0064	UGAGUGGUAGCGUGGAUGUUUGUGUUUGCUGGCUCAAUGCUUUGGCUUUGAACGGUUUGCAUAUGAUCCUGAUCAUUUU	NW_013657497.1:19579:19657:-	79(nt)	-20.60(kcal/mol)
xxx-m0065	UGCAUGGCCGUUCUUAGUUGGUGGAGCGAUUUGUCUGGUUAAUUCCGUUAACGAACGAGACCUCAGCCUGCUAAAUAGCUAUGU	NW_013657497.1:47750:47833:-	84(nt)	-25.50(kcal/mol)
xxx-m0067	UGCGAGGUGGGUAGUUUAUCUGGGGCGGAUGCCUCCUAAAGAGUAACGGAGGUGUGCGAAGGUAGGCUCAAGCUAAGAU	NW_013657516.1:7984:8062:+	79(nt)	-24.90(kcal/mol)
xxx-m0069	UCCAGUGGCUGGAAGAGCACCGCACGUCACGUGGAGUCCGGUGCGCCCCUGGCGGCCCUUUAAAAUCCGGAGGACCGAGUGCCUUCCUUGCCCGGU	NW_013657528.1:88841:88936:-	96(nt)	-36.00(kcal/mol)
		11
		18
		15
		11
		14
		25
		46
		15
		11
		12
		23
		16
		38
		11
		11
		13
		58
		35
		19
		195
		10
		24
		15
		25
		20
		32
		78
		294
		12
		213
		57
		52
		10
		14
		52
		22
		16
		21
		808
		195
		11
		17
		384
		23
		15
		1040
		10

## Sheet: DR3
novel-id		chr-location	length	potential_energy	sequence	read-number
xxx-m0005	GCAAGAGUGUGGCGUUUCUCUAAUAUCUUCCUCUUUGAUUCAGUUAACGAAGGGGAUGUAGCUGAAUUUCGUCUCACAGACAU	NC_016408.2:4907664:4907746:-	83(nt)	-20.50(kcal/mol)
xxx-m0006	UGUUUCGGUUUUUGACGUUGCGAACCUCUGGACCUAGGCCGUGCUCCACCGCUCCGUUCUGUCCACAGCCGCAUUGUCUUCAAGCGCCGUCGCAU	NC_016408.2:18030665:18030759:-	95(nt)	-27.70(kcal/mol)
xxx-m0007	GACCGUUCGUCCAUUAAAGUGGUACGUGAGCUGGAUUCAGAACGUCGUGAGGCAGUUCGGUCCAUAUCCGCUGUGGGCGUGUAAGUUA	NC_016409.2:39891363:39891450:+	88(nt)	-25.50(kcal/mol)
xxx-m0008	GCCGCUUCUAGUUGGCUCGUCCUGCUUGACUGUUGAAAAAGUAGGGCGGGGCAAGGAUGGGACGGG	NC_016409.2:4512940:4513005:-	66(nt)	-29.80(kcal/mol)
xxx-m0010	UUGAGAACAGCUGUUGGUUAAGCAAGGAGUAUGGUAACACAUUUUGUUGUAUAGUACCCAUUGCUGCCAAUCUCAACUCAG	NC_016409.2:43033313:43033393:-	81(nt)	-21.20(kcal/mol)
xxx-m0012	ACCAGGCCCGGGCGACUGUUUAUCAAAAACACAGGUCUUCGCAAAGUCGUAAGACCAUGUAUGGGGGCUGACGUCUGUCCAGUGCCGGA	NC_016410.2:50525874:50525962:+	89(nt)	-26.60(kcal/mol)
xxx-m0013	AAGGCUUCCGGUGGUGAUGGAGAUGAGGAGGAUGAAGAUUAAAUAAUUAACUUACAAAUUCUCUUGAUUUUGGUCAUCCUGGUCGCGUG	NC_016410.2:44927035:44927123:-	89(nt)	-31.90(kcal/mol)
xxx-m0014	AUAGAUGCUGGGUUCGGUCGGAUUUGGGCUUCGAUGGGCCUGAAAAUUCAAUCCGAGCCCGCCCAUCUAA	NC_016410.2:50038902:50038971:-	70(nt)	-30.90(kcal/mol)
xxx-m0015	GUGUGGGCCUUCCGUGGGCUAUAAUCCAGAAGCCAUGGGCUCGAGAGAUGCUGUGCUUGGCGGGCUUGUGGGCUUAGGUGGGCCUUUUA	NC_016411.2:33327746:33327834:+	89(nt)	-33.40(kcal/mol)
xxx-m0018	CCUUGAAUUCUCUAAUCUCUGUUCCCAAUUACACUUAAUCCAUGAAAAGAUCAAGUGAGUUUGGGAUCAGAAAUUAGAGAUAUCAAUA	NC_016411.2:42295745:42295832:-	88(nt)	-33.90(kcal/mol)
xxx-m0019	CCAGCAAGCAUCUGACGAGGUUGAGGACCAUCGGGAUGACCCUUCUGCAUCACCAUCUUAGUAUUCACCACCUUAACAGUUAGAGUGUGGGCAUU	NC_016412.2:20603621:20603715:+	95(nt)	-22.30(kcal/mol)
xxx-m0023	UCACGCCGUUGCAUUUGGGUCAAUGGACCUGUGAUCAUAGGUGCAGGUCCAUCUGGUCUUGCAACGGCAGCA	NC_016413.2:39838972:39839043:+	72(nt)	-35.90(kcal/mol)
xxx-m0024	CAUGGUCAUUGUUGACCGCUCAUACGACCCCUGCAAUUGCAUUGCAGCUUAUGUGGGGGUUGUAUAACGGUCAACAAAGAUCCUUGA	NC_016413.2:43749379:43749465:+	87(nt)	-43.70(kcal/mol)
xxx-m0025	CUUAAUGCUUUUGGGUCAUUUAAUCGGUUGGGAAAUCGUCGAUUAAACGAUCCAAUCGACUUUGUGAUUGUUUAAAUGUUUGAGA	NC_016413.2:3544591:3544675:-	85(nt)	-20.80(kcal/mol)
xxx-m0027	AAAAUUAGGCAUACUGGUAGUUUGUAAUUCAGUUCAUGGUAGUGAAAUCUACCCUAUUAAUUAAAGAUUGCUAGCCUUACCGGUGUAAAUGUUAGU	NC_016413.2:43832859:43832954:-	96(nt)	-20.80(kcal/mol)
xxx-m0031	CGAAGUCGGUAACUGAAAUCAGAAGCUUCUUGGGUUUGGCUGGUUAUUACCGCAGGUUUAUUGAGGGGUUUUCGAAGUUAGCACUUCC	NW_013657482.1:66013:66100:+	88(nt)	-24.40(kcal/mol)
xxx-m0036	UGCAUGGCCGUUCUUAGUUGGUGGAGCGAUUUGUCUGGUUAAUUCCGUUAACGAACGAGACCUCAGCCUGCUAAAUAGCUAUGU	NW_013657494.1:41595:41678:-	84(nt)	-25.50(kcal/mol)
xxx-m0037	UGAGACCUUGGUAGGGUGUGCCAUGAUAGAUGGUGGAUGUGCGACCCACGAGACCAAAUCAUGUGCAGCUCUAUUGAAUGUGGACUC	NW_013657494.1:65432:65518:-	87(nt)	-27.20(kcal/mol)
xxx-m0038	UGAUUCGCACAAUUGGUCAUCGCGCUUGGUUGAAAAGCCAGUGGCGCGAAGCUACCGUGCGUUGGAUUAU	NW_013657497.1:21183:21252:-	70(nt)	-26.50(kcal/mol)
xxx-m0039	UCCGGUGAAGUGUUCGGAUUGCGGCGACGUGGGCGGUCCGCUGCCCGCGACGUUGUGAGAAGUCCACUGAACCUUA	NW_013657497.1:26843:26918:-	76(nt)	-36.50(kcal/mol)
xxx-m0041	GCAUGGCCGUUCUUAGUUGGUGGAGCGAUUUGUCUGGUUAAUUCCGUUAACGAACGAGACCUCAGCCUGCUAAAUAGCUAUG	NW_013657528.1:46013:46094:-	82(nt)	-23.50(kcal/mol)
		114
		10
		58
		28
		10
		10
		12
		11
		13
		17
		31
		190
		18
		13
		12
		11
		17
		10
		24
		1146
		12

## Sheet: Sheet1
novel-id	sequence	novel-id	sequence	chr-location	length	potential_energy	sequence
xxx-m0002-5p	GUUGACCGCUCAUACGACCCCUG	xxx-m0002	CAUGGUCAUUGUUGACCGCUCAUACGACCCCUGCAAUUGCAUUGCAGCUUAUGCGGGGGUCGUAUAAUGGUCAACAGAGACCCUUGA	NC_016407.2:22335089:22335175:+	87(nt)	-49.40(kcal/mol)
xxx-m0004-5p	UUAUCCGCAGGAAUACCUGAGGA	xxx-m0004	CGGCUGAAAUUUAUCCGCAGGAAUACCUGAGGAUUUUCAUGCGGUUAUCAUUAUACUAUGGUCACUUCCUGCGGGUAACUGUAUCUUCUGCUGA	NC_016407.2:17965011:17965104:-	94(nt)	-28.30(kcal/mol)
xxx-m0005-5p	GCUUUCGGUUGCUGUCCGUCC	xxx-m0005	CAACAACGGAGCUUUCGGUUGCUGUCCGUCCUCUGUCCUCGCAGCUCAACGUCAAUGGCAGCUCAAAUCCCUCCGUCAACC	NC_016407.2:37807782:37807862:-	81(nt)	-22.80(kcal/mol)
xxx-m0006-5p	UGCUACUGCAGUUUUCUUGAUCU	xxx-m0006	CUGUUGCAGCUGCUACUGCAGUUUUCUUGAUCUACCCAAUUGGUCAAGGAAGCUUUUCAGAUGGUAUGCCUCUAGG	NC_016407.2:38650894:38650969:-	76(nt)	-24.40(kcal/mol)
xxx-m0008-5p	CGGUGGAGCGGUGAAAUGCGUAGA	xxx-m0008	AGGGAAUUUCCGGUGGAGCGGUGAAAUGCGUAGAGAUCGGAAGGAACACCAAUGGCGAAAGCGACAUUUUCCAUCGCUCUCGGUUCACCA	NC_016407.2:43192319:43192408:-	90(nt)	-25.70(kcal/mol)
xxx-m0009-5p	UGUGCGUGCUAGAUCCGAGUUGC	xxx-m0009	UUGCAAAUCAUGUGCGUGCUAGAUCCGAGUUGCGUGAUCCAAAUGUUCAUCACGAAUUGCAAGCAGAUCUAGUGAAGCACAUAUGGACAAAGUUUGGAAU	NC_016407.2:45239539:45239638:-	100(nt)	-24.80(kcal/mol)
xxx-m0010-3p	AGAUUGGUGGGGUCCACUUUC	xxx-m0010	AUUAUCUCCGAGACGUGAAAACCGGAUUUCAUUUACUGAACCGGGUUUCCGGCUGAGAUUGGUGGGGUCCACUUUCCGGAGAUGGA	NC_016408.2:2972877:2972962:+	86(nt)	-28.80(kcal/mol)
xxx-m0011-3p	CAAGCUGGUAUCUGUAGGUGG	xxx-m0011	CAGCAACAAGCAAAGCCUGGAUGGUGGCUGCAAGUGUUGGAGUUGUGGAAGCUUUGAAAGAUCAAGCUGGUAUCUGUAGGUGGAACUAUGCUU	NC_016408.2:38024931:38025023:+	93(nt)	-24.10(kcal/mol)
xxx-m0012-5p	AAGUGUCGUGUCGGUGUUUGACAC	xxx-m0012	GUGUAAUUAUAAGUGUCGUGUCGGUGUUUGACACGACACGUGUCAGACAUCGAGACACGUCUAAUUUAAG	NC_016408.2:5891733:5891802:-	70(nt)	-29.60(kcal/mol)
xxx-m0013-5p	UUUGUGUAUGGUGCUCCUGGAA	xxx-m0013	GAAGAAUCCAUUUGUGUAUGGUGCUCCUGGAAGUAAGAUUAUUGUAACAACAAGAAUUGCUCACGUGGCAUCAAUUAUGCAGACUGUUGAGCCUUA	NC_016408.2:25743894:25743989:-	96(nt)	-21.40(kcal/mol)
xxx-m0014-3p	UUAAAGGACUCGUUGUCUGUAU	xxx-m0014	UAAUCAGUAAAGUAUAUUAUAUAGAUAAUGAAUACUGAUAAUGAGCUAAGUAACACAUUUAACUCCACAAUUAAAGGACUCGUUGUCUGUAUAAGCUGAAAG	NC_016408.2:30603084:30603185:-	102(nt)	-22.80(kcal/mol)
xxx-m0017-5p	UAAGUCUCUUCGGCCCAUCGAAUC	xxx-m0017	CUUUUGUAUUUAAGUCUCUUCGGCCCAUCGAAUCAAAGAUUUCAUCUCAAAAAUCUCUGGACGAAGAAACUUAAAUAGGGGCA	NC_016409.2:15923234:15923316:+	83(nt)	-20.80(kcal/mol)
xxx-m0018-5p	GUUGACCGCUCAUACGACCCCUG	xxx-m0018	CAUGGUCAUUGUUGACCGCUCAUACGACCCCUGCAAUUGCAUUGCAGCUUAUGCGGGGGUCGUAUAACGGUCAACAGAGACCCUU	NC_016409.2:22002517:22002601:+	85(nt)	-50.90(kcal/mol)
xxx-m0019-5p	GUUAUGACUAUUGACGCGUUUG	xxx-m0019	UGACUUAUGAGUUAUGACUAUUGACGCGUUUGGGAGAGUUAUAACCUUUUUAUAGUUUAUUUCCAUAAGCUCUUUAGGGUAGCUUAUAAAACA	NC_016409.2:33433712:33433804:+	93(nt)	-23.10(kcal/mol)
xxx-m0022-3p	CGGAUCUAGCACGCACAUGAUUU	xxx-m0022	UCCAAACUUUGUCCAUAUGUGCUUCACUAGAUCUGCUUGCAAUUCGUGAUGAACAUUUGGAUCACGCAACUCGGAUCUAGCACGCACAUGAUUUGCAAAAGUGG	NC_016409.2:6048259:6048362:-	104(nt)	-30.10(kcal/mol)
xxx-m0023-5p	CAAGAUUUUAUGGGACAAGCUUA	xxx-m0023	AUACCAAGCUCAAGAUUUUAUGGGACAAGCUUAUUGUUAAUUGGCCUUAUUAACAGUAAAUUAUGUGGGCAUAUAUCAUCAUGAGUUGAGGCAA	NC_016409.2:26518269:26518362:-	94(nt)	-20.90(kcal/mol)
xxx-m0024-3p	UUAUUGUGACCCAAAAACCUA	xxx-m0024	AGCCCAGGUUUAACGAUGGAAUAUGAGGUAGUUGGGGAGGAUAGAUAAGACUGCUAGUUGCUCGAUCAGGACCCUAGAUUUAUUGUGACCCAAAAACCUAUUCCAGGGGC	NC_016409.2:50568170:50568279:-	110(nt)	-26.80(kcal/mol)
xxx-m0025-3p	ACGAUAAUUCCGGCAUUUUGAA	xxx-m0025	GACAAACCUCUUGGAACGGAAUGAUCGUCUUUGAAGACGAUAAUUCCGGCAUUUUGAAGAGAAGAAGU	NC_016410.2:4129686:4129753:+	68(nt)	-23.20(kcal/mol)
xxx-m0027-3p	GUCGCUGAUCUCUCUGGUUGGG	xxx-m0027	ACAUGAACAAAGAUUCCAACAAGACUCUCAGAUGGUGCAAAGAUGGAGGGAAGCUCUAAUACAAGUCGCUGAUCUCUCUGGUUGGGAUCUACAUGA	NC_016410.2:31496488:31496583:+	96(nt)	-24.80(kcal/mol)
xxx-m0028-5p	UCCCUUGUUGUCCUCUCAUCAU	xxx-m0028	AGCAAGGUUAUCCCUUGUUGUCCUCUCAUCAUUCACCAACUGGUCGGAGGAAUUAAGGGAGUAUGUGAAGCC	NC_016410.2:4917568:4917639:-	72(nt)	-21.40(kcal/mol)
xxx-m0029-5p	UUGCACUGAUUUUGUUUUGGACGG	xxx-m0029	UAUUUUUUUUUUGCACUGAUUUUGUUUUGGACGGGGAAACACUUGUAUGUUGUUUUCUUGUUGAAGAUUCAGUGCUUACAGAAAAAGC	NC_016410.2:17856539:17856626:-	88(nt)	-29.10(kcal/mol)
xxx-m0030-3p	GAAUAAACAGACUGUUAAAUCUU	xxx-m0030	UGUUAAGUGGCAUAGAUUUUUUGCAGCCGUGUUGAGUCACUUCACCUUCGUUUUUCCACAGGUGCAGUGAAUAAACAGACUGUUAAAUCUUUCAAUUCCCA	NC_016410.2:50482539:50482639:-	101(nt)	-22.90(kcal/mol)
xxx-m0032-3p	AAGGGCAGAGGCCUUUGGUGU	xxx-m0032	CAACAUGAAAAAACCAAAACCUCUGUCCCCCAUCCCUUGAAUAGCUAGGAAGGGCAGAGGCCUUUGGUGUCCUCUCCAGU	NC_016411.2:2234623:2234702:+	80(nt)	-22.50(kcal/mol)
xxx-m0033-5p	UCAGUGCACGAUGUUUGCAGAG	xxx-m0033	GUAAGGAGUUUCAGUGCACGAUGUUUGCAGAGAACUUCAUUGUUAGAAACUCUAAAGCAAGUCUAUAAAUAUCGUGCACUGAAUCUCUUUUACA	NC_016411.2:15342296:15342389:+	94(nt)	-38.20(kcal/mol)
xxx-m0034-5p	AUAAUGGUGGUGUUGAAGCAUG	xxx-m0034	AGCGGUAUUGAUAAUGGUGGUGUUGAAGCAUGUGAGAUUGCGUUGAACACCCCACGUCGGUAAUGGUA	NC_016411.2:23103683:23103750:+	68(nt)	-23.40(kcal/mol)
xxx-m0035-3p	CUACGGCCGGGUGGAUGUUGAAG	xxx-m0035	CCAUGGCUCCCUUCCUCCUUCUUCCUCGGCUCCUAUCACAGUGGCUACGGCCGGGUGGAUGUUGAAGCUCAGCCUGU	NC_016411.2:28309834:28309910:+	77(nt)	-22.60(kcal/mol)
xxx-m0039-3p	GCCAGGGUCAGAUCUUACAAAG	xxx-m0039	CCAUAUCAGGCUUUCACAAGGUCAGGCUUAGGCCUUCUAAAAAAUUGGCAGGCCAGGGUCAGAUCUUACAAAGCCUAACUCGG	NC_016411.2:41387084:41387166:+	83(nt)	-30.40(kcal/mol)
xxx-m0040-3p	UUUGAUUGCAGCUUUCUAGUU	xxx-m0040	UUGGUGGUUUAAUUAGAAGAGGUGAUGAAGUUGUGUAAUUUGAUUGCAGCUUUCUAGUUGUUGCCACUA	NC_016411.2:1515213:1515281:-	69(nt)	-23.30(kcal/mol)
xxx-m0041-5p	CGAGCUCUGGGCUUUACCGCAU	xxx-m0041	UUAAAGAGAGCGAGCUCUGGGCUUUACCGCAUGAGAAUUCUAUUUUCCCAGCUCUAAGGUUGAGCUACUUUCAUUUAU	NC_016411.2:17983294:17983371:-	78(nt)	-20.90(kcal/mol)
xxx-m0042-5p	AGUGAACAAAUGCGAGAAGUA	xxx-m0042	UUGGGAGCUUAGUGAACAAAUGCGAGAAGUAGUAUCGCGCAAUUACUUGAAGUUCUUCUUCUUUUCGACAAACUGUGCCAUUUGAGUUUUCAAG	NC_016411.2:20861193:20861286:-	94(nt)	-21.20(kcal/mol)
xxx-m0044-5p	UCUAAUCUCUGUUCCCAAUUAC	xxx-m0044	CCUUGAAUUCUCUAAUCUCUGUUCCCAAUUACACUUAAUCCAUGAAAAGAUCAAGUGAGUUUGGGAUCAGAAAUUAGAGAUAUCAAUA	NC_016411.2:42295745:42295832:-	88(nt)	-33.90(kcal/mol)
xxx-m0047-3p	UUUCUCCUGUUUUCUCCUGUGA	xxx-m0047	GUUGAUUGAAAGCAAAAGAAAGGGGAAUGGAUUGUCUCCAGUCCAAUUUUCUCCUGUUUUCUCCUGUGAAGCAAUCUGA	NC_016412.2:35241117:35241195:-	79(nt)	-25.10(kcal/mol)
xxx-m0048-3p	ACGAGUGGCUGAGAUCUCACUG	xxx-m0048	UGGACCGAGAGCAGUGAAAAUCUCACCAUCCAAUUGUUCUAACAUGUUCGAUAGGGUCAAACGAGUGGCUGAGAUCUCACUGAACUCACCCG	NC_016413.2:23874135:23874226:+	92(nt)	-27.50(kcal/mol)
xxx-m0049-5p	ACAAUGUGGUGGAACAUGGCUU	xxx-m0049	AGUGGGGGCAACAAUGUGGUGGAACAUGGCUUAGGAUUUGCCAGGUUGGGUUAGUGGCUGCACCAUGCUGGCCUGCCCACUC	NC_016413.2:37147500:37147581:+	82(nt)	-26.30(kcal/mol)
xxx-m0050-5p	GCAUUUGGGUCAAUGGACCUGU	xxx-m0050	UCACGCCGUUGCAUUUGGGUCAAUGGACCUGUGAUCAUAGGUGCAGGUCCAUCUGGUCUUGCAACGGCAGCA	NC_016413.2:39838972:39839043:+	72(nt)	-35.90(kcal/mol)
xxx-m0052-5p	UUGUCUGGUCUCUCUGAUAGUGA	xxx-m0052	AGCUCACUCUUUGUCUGGUCUCUCUGAUAGUGACUGUUGGUUGUUGUUCAAACAACAUGCAUUUAGACAUUACAGAGAAGAGCAUACAAAGCUUGUGGAAA	NC_016413.2:26707899:26707999:-	101(nt)	-34.20(kcal/mol)
xxx-m0053-5p	CGACCGCAUCUGCUGCCACACCA	xxx-m0053	AUGUAUUCAUCGACCGCAUCUGCUGCCACACCAUAUGCUAACAUUCGCAUUGCUGUGGUACAUUUUGCUAACGGUGAUAUACCU	NC_016413.2:32128962:32129045:-	84(nt)	-26.30(kcal/mol)
xxx-m0055-5p	CUAGCAGUGCAGCAGCCUGUUA	xxx-m0055	GCUUUGUGGGCUAGCAGUGCAGCAGCCUGUUAUCCCUCCACUGUCAAGAGGCGGCAGUACUCGCUGCUCUGUGAAGCC	NC_016413.2:37147662:37147739:-	78(nt)	-29.50(kcal/mol)
xxx-m0057-3p	AUCCCUAACUAGUAGUUAUC	xxx-m0057	UAGCGCAGCUUGGUAGCGCGUUUGUUUUGGGUACAAAAUGUCACAGGUUCAAAUCCUGUCAUCCCUAUCCCUAACUAGUAGUUAUCGUAUCAGCAG	NC_016414.2:17652459:17652554:+	96(nt)	-20.30(kcal/mol)
xxx-m0059-5p	AUUGCCCAUCUUUCGGACGUACU	xxx-m0059	UGUCUUUGUAAUUGCCCAUCUUUCGGACGUACUUGAUGAUGUGGUUCUGGGGACAAGUCAGCCCGUUGUAUCGGUCGAAAUCUGGGAUUUUGAACUUUUUAGGGACAU	NC_016414.2:27609823:27609930:+	108(nt)	-24.40(kcal/mol)
xxx-m0060-3p	UCGGAUCUAGCACGCACAUGAUU	xxx-m0060	AACUUUGUCCAUAUGUGCUUCACUAGAUCUGCUUGCAAUUCGUGAUGAACAUUUGGAUCACGCAACUCGGAUCUAGCACGCACAUGAUUUGCAAAAGUG	NC_016414.2:1634387:1634485:-	99(nt)	-29.70(kcal/mol)
xxx-m0064-5p	ACAUGAGAUGGGUUAGACCC	xxx-m0064	GAACAAGUGGACAUGAGAUGGGUUAGACCCAAACCCGAUCCUAACUUAGACCAAAUCAAUUAUGGGUCAUGAUAACUUGUGUUAUAAAAACACAUGUUA	NC_016414.2:14441574:14441672:-	99(nt)	-20.70(kcal/mol)
xxx-m0065-5p	CCUGAAGAAAUAGUGCUCCUGA	xxx-m0065	UUAAAGCGCUCCUGAAGAAAUAGUGCUCCUGAAGUGAUGACGUCAUCAGAAGCAAGUUCAUCAGAAGCAAGUUUAUC	NC_016414.2:22674001:22674077:-	77(nt)	-20.90(kcal/mol)
xxx-m0069-3p	AUCAUGGUCGUGGUCGUGGUCG	xxx-m0069	GCGAUGGGCCGCCGUAUGCGCACCGUGAUCGUGAUGCUCAUCGUCGUGAUCAUGGUCGUGGUCGUGGUCGUGCCCAUGAU	NW_013656059.1:1181:1260:-	80(nt)	-38.10(kcal/mol)
xxx-m0071-5p	ACGUUUGUUGCUGACUGCUGUA	xxx-m0071	AUGCUCCUUCACGUUUGUUGCUGACUGCUGUAAAUCUGGAGGCCUACUCGAAGGCGCAAAGGAAAUAGUUGGUCAUAGCAAGAUUGGAUCUA	NW_013657209.1:6734:6825:-	92(nt)	-22.50(kcal/mol)
xxx-m0072-3p	AAACAACGUGGUCGGGAAAA	xxx-m0072	UUCCAGACGCACGGUUUCCGGCACGUCGUAUCCCUCUAAAGGAAAAACAACGUGGUCGGGAAAAAUGUAGGGAU	NW_013657294.1:6583:6656:-	74(nt)	-21.90(kcal/mol)
xxx-m0073-5p	UGAGACCUCAGGUCAGGCGGG	xxx-m0073	ACGCUUGUGAUGAGACCUCAGGUCAGGCGGGGCUACCCGCUGAAUUUAAGCAUAUCAAUAAGCGG	NW_013657397.1:34959:35023:+	65(nt)	-25.30(kcal/mol)
xxx-m0075-5p	CGGCGGUCGCUGCAAAACCCGG	xxx-m0075	UAGGAGGGCGCGGCGGUCGCUGCAAAACCCGGGGCGUGAGCCUGGGCGGAGCGGUCGUCGGUGCAGAUCUUGG	NW_013657494.1:16012:16084:+	73(nt)	-33.90(kcal/mol)
xxx-m0076-5p	CUUUUCAACCAAGCGCGAUGAC	xxx-m0076	GCGCCACUGGCUUUUCAACCAAGCGCGAUGACCAAUUGUGCGAAUCAACGGUUCCUCUCGUACUAGGUUGAAUUACUAUUGCGACA	NW_013657494.1:45284:45369:+	86(nt)	-24.10(kcal/mol)
xxx-m0077-3p	UUUUGAUCCUUCGAUGUCGG	xxx-m0077	ACAGGGAUAACUGGCUUGUGGCAUCCAAGCGUUCAUAGCGACGUUGCUUUUUGAUCCUUCGAUGUCGGCUAUUCCUAU	NW_013657494.1:76894:76971:-	78(nt)	-21.60(kcal/mol)
xxx-m0080-5p	ACAAUUGGUCAUCGCGCUUGGUU	xxx-m0080	GUUGAUUCGCACAAUUGGUCAUCGCGCUUGGUUGAAAAGCCAGUGGCGCGAAGCUACCGUGCGUUGGAUUAUG	NW_013657497.1:39574:39646:+	73(nt)	-26.70(kcal/mol)
xxx-m0081-3p	UUCGGAUAUGAAGUCUCAUUC	xxx-m0081	AUCAAGUUUUGAAUGACUUUCUAGUCAGAUCGUUCCUGCGUUUCGGAUAUGAAGUCUCAUUCGAAGCUUUAG	NW_013657516.1:37212:37283:-	72(nt)	-21.20(kcal/mol)
xxx-m0082-5p	UAGUAGCUGGUUCCCUCCGAAU	xxx-m0082	UCGAACCGUCUAGUAGCUGGUUCCCUCCGAAUUUUCCCUCAGGAUAGCUGGAGCCCGAGGGCGAGUUUUAUCGGGCAAAGCCAAUGAUUAGAGGCAUCGGG	NW_013657528.1:41167:41267:-	101(nt)	-32.30(kcal/mol)
xxx-m0083-5p	AUCACGUCGGGAGCACGUGCUCGG	xxx-m0083	GGUGGGCCAAAUCACGUCGGGAGCACGUGCUCGGGCCAAACCACGUCGGGGGGCAGAAAUUCCUCGAGCGCGCCUGCGCGCCCGUGUUAUUAAGGUCAUACCG	NW_013657528.1:95998:96100:-	103(nt)	-39.80(kcal/mol)
xxx-m0003-3p	UUUGCUUGGAUCAAAUAGAAAG	xxx-m0003	AGUGUACCAAUAUUCUUUUGGUUCGAGUUCAAGUGGUUAGUCUCGUAACGACUAUGAAUGAACUAGCUUUGCUUGGAUCAAAUAGAAAGUAAAAAGGAA	NC_016407.2:18126650:18126748:+	99(nt)	-22.30(kcal/mol)
xxx-m0005-5p	UUAUCCGCAGGAAUACCUGAGGA	xxx-m0005	CGGCUGAAAUUUAUCCGCAGGAAUACCUGAGGAUUUUCAUGCGGUUAUCAUUAUACUAUGGUCACUUCCUGCGGGUAACUGUAUCUUCUGCUGA	NC_016407.2:17965011:17965104:-	94(nt)	-28.30(kcal/mol)
xxx-m0006-5p	GCUUUCGGUUGCUGUCCGUCC	xxx-m0006	CAACAACGGAGCUUUCGGUUGCUGUCCGUCCUCUGUCCUCGCAGCUCAACGUCAAUGGCAGCUCAAAUCCCUCCGUCAACC	NC_016407.2:37807782:37807862:-	81(nt)	-22.80(kcal/mol)
xxx-m0007-5p	GCUACUGCAGUUUUCUUGAUCU	xxx-m0007	UGUUGCAGCUGCUACUGCAGUUUUCUUGAUCUACCCAAUUGGUCAAGGAAGCUUUUCAGAUGGUAUGCCUCUAGG	NC_016407.2:38650894:38650968:-	75(nt)	-23.90(kcal/mol)
xxx-m0008-5p	CGGUGGAGCGGUGAAAUGCGUAGA	xxx-m0008	AGGGAAUUUCCGGUGGAGCGGUGAAAUGCGUAGAGAUCGGAAGGAACACCAAUGGCGAAAGCGACAUUUUCCAUCGCUCUCGGUUCACCA	NC_016407.2:43192319:43192408:-	90(nt)	-25.70(kcal/mol)
xxx-m0009-3p	UUCGAAUCCCCUGCCGAUGUGAGG	xxx-m0009	CAACGUCGGUUGUCUAGUUGGUAAGGAUUCAACUCAGCUCCCACAAGGACCUGAGUUCGAAUCCCCUGCCGAUGUGAGGACCAAAUACC	NC_016407.2:43369744:43369832:-	89(nt)	-39.40(kcal/mol)
xxx-m0010-3p	UUGAGUCUCCUUGGUCCUAGAC	xxx-m0010	CUGCCCACUCCAAGUUGAGAGUUGGCCAAUGUGACCUAGGCGAAGGCUUGAGUCUCCUUGGUCCUAGACUGGAGGGCAC	NC_016407.2:46621488:46621566:-	79(nt)	-31.70(kcal/mol)
xxx-m0012-3p	UUAAAGGACUCGUUGUCUGUAU	xxx-m0012	UAAUCAGUAAAGUAUAUUAUAUAGAUAAUGAAUACUGAUAAUGAGCUAAGUAACACAUUUAACUCCACAAUUAAAGGACUCGUUGUCUGUAUAAGCUGAAAG	NC_016408.2:30603084:30603185:-	102(nt)	-22.80(kcal/mol)
xxx-m0013-5p	UUUGGGUCAUUUAAUCGGUUGGG	xxx-m0013	ACUUAAUGCUUUUGGGUCAUUUAAUCGGUUGGGAAAUCGUCGAUUAAACGAUCCAAUCGACUUUGUGAUUAUUUAAAUGUUUGAGA	NC_016409.2:49434461:49434546:+	86(nt)	-20.80(kcal/mol)
xxx-m0014-3p	UAUAGUACCCAUUGCUGCCAAU	xxx-m0014	UUGAGAACAGCUGUUGGUUAAGCAAGGAGUAUGGUAACACAUUUUGUUGUAUAGUACCCAUUGCUGCCAAUCUCAACUCAG	NC_016409.2:43033313:43033393:-	81(nt)	-21.20(kcal/mol)
xxx-m0015-3p	UUUAUUGUGACCCAAAAACCUA	xxx-m0015	AGCCCAGGUUUAACGAUGGAAUAUGAGGUAGUUGGGGAGGAUAGAUAAGACUGCUAGUUGCUCGAUCAGGACCCUAGAUUUAUUGUGACCCAAAAACCUAUUCCAGGGGC	NC_016409.2:50568170:50568279:-	110(nt)	-26.80(kcal/mol)
xxx-m0016-3p	AUCCCUAACUAGUAGUUAUC	xxx-m0016	UAGCGCAGCUUGGUAGCGCGUUUGUUUUGGGUACAAAAUGUCACAGGUUCAAAUCCUGUCAUCCCUAUCCCUAACUAGUAGUUAUCGUAUCAGCAG	NC_016410.2:18053689:18053784:+	96(nt)	-20.30(kcal/mol)
xxx-m0017-3p	UCGCUGAUCUCUCUGGUUGGGA	xxx-m0017	AACAUGAACAAAGAUUCCAACAAGACUCUCAGAUGGUGCAAAGAUGGAGGGAAGCUCUAAUACAAGUCGCUGAUCUCUCUGGUUGGGAUCUACAUGAU	NC_016410.2:31496487:31496584:+	98(nt)	-24.80(kcal/mol)
xxx-m0018-3p	GAAUAAACAGACUGUUAAAUCUU	xxx-m0018	UGUUAAGUGGCAUAGAUUUUUUGCAGCCGUGUUGAGUCACUUCACCUUCGUUUUUCCACAGGUGCAGUGAAUAAACAGACUGUUAAAUCUUUCAAUUCCCA	NC_016410.2:50482539:50482639:-	101(nt)	-22.90(kcal/mol)
xxx-m0019-5p	UUGACCGCUCAUACGACCCCUGC	xxx-m0019	AUGGUCAUUGUUGACCGCUCAUACGACCCCUGCUUAUGCGGAAGUCAUAUAACGGUCAAUAGAGACCAUU	NC_016410.2:53269265:53269334:-	70(nt)	-31.20(kcal/mol)
xxx-m0021-3p	AAGGGCAGAGGCCUUUGGUGU	xxx-m0021	CAACAUGAAAAAACCAAAACCUCUGUCCCCCAUCCCUUGAAUAGCUAGGAAGGGCAGAGGCCUUUGGUGUCCUCUCCAGU	NC_016411.2:2234623:2234702:+	80(nt)	-22.50(kcal/mol)
xxx-m0022-3p	UUCACUGCUCUGUGAAACCAGC	xxx-m0022	GCCAUAUGGGCUGAGAAUACUGCAGCCUGUGAUCCCUCCACUGUCAAGAGAAGGAAGUGUUCACUGCUCUGUGAAACCAGCCUCAUGCGGA	NC_016411.2:39310535:39310625:+	91(nt)	-26.70(kcal/mol)
xxx-m0025-5p	CGAGCUCUGGGCUUUACCGCAU	xxx-m0025	UUAAAGAGAGCGAGCUCUGGGCUUUACCGCAUGAGAAUUCUAUUUUCCCAGCUCUAAGGUUGAGCUACUUUCAUUUAU	NC_016411.2:17983294:17983371:-	78(nt)	-20.90(kcal/mol)
xxx-m0026-5p	AGUGAACAAAUGCGAGAAGUA	xxx-m0026	UUGGGAGCUUAGUGAACAAAUGCGAGAAGUAGUAUCGCGCAAUUACUUGAAGUUCUUCUUCUUUUCGACAAACUGUGCCAUUUGAGUUUUCAAG	NC_016411.2:20861193:20861286:-	94(nt)	-21.20(kcal/mol)
xxx-m0028-5p	UCUAAUCUCUGUUCCCAAUUAC	xxx-m0028	CCUUGAAUUCUCUAAUCUCUGUUCCCAAUUACACUUAAUCCAUGAAAAGAUCAAGUGAGUUUGGGAUCAGAAAUUAGAGAUAUCAAUA	NC_016411.2:42295745:42295832:-	88(nt)	-33.90(kcal/mol)
xxx-m0030-5p	ACAAUGUGGUGGAACAUGGCUU	xxx-m0030	AGUGGGGGCAACAAUGUGGUGGAACAUGGCUUAGGAUUUGCCAGGUUGGGUUAGUGGCUGCACCAUGCUGGCCUGCCCACUC	NC_016413.2:37147500:37147581:+	82(nt)	-26.30(kcal/mol)
xxx-m0031-5p	GCAUUUGGGUCAAUGGACCUGU	xxx-m0031	UCACGCCGUUGCAUUUGGGUCAAUGGACCUGUGAUCAUAGGUGCAGGUCCAUCUGGUCUUGCAACGGCAGCA	NC_016413.2:39838972:39839043:+	72(nt)	-35.90(kcal/mol)
xxx-m0033-5p	UACUGCAGUUUUCUUGAUCU	xxx-m0033	UUGCAGCUGCUACUGCAGUUUUCUUGAUCUACCCAAUUGGUCAAGGAAGCUUUUCAGAUGGUAUGCCUCUA	NC_016413.2:6942405:6942475:-	71(nt)	-23.90(kcal/mol)
xxx-m0034-3p	AUCUCAAUUGAUGAGUCUGC	xxx-m0034	AGGAGGUUGCGUACAUGGCUCCUCAUUAGUUGUUUUGCAACACAUACAUUUGGGAUCUCAAUUGAUGAGUCUGCAGUAAUCUCC	NC_016413.2:41070722:41070805:-	84(nt)	-24.20(kcal/mol)
xxx-m0036-5p	ACAUGAGAUGGGUUAGACCC	xxx-m0036	GAACAAGUGGACAUGAGAUGGGUUAGACCCAAACCCGAUCCUAACUUAGACCAAAUCAAUUAUGGGUCAUGAUAACUUGUGUUAUAAAAACACAUGUUA	NC_016414.2:14441574:14441672:-	99(nt)	-20.70(kcal/mol)
xxx-m0038-5p	ACGUUUGUUGCUGACUGCUGUA	xxx-m0038	AUGCUCCUUCACGUUUGUUGCUGACUGCUGUAAAUCUGGAGGCCUACUCGAAGGCGCAAAGGAAAUAGUUGGUCAUAGCAAGAUUGGAUCUA	NW_013657209.1:6734:6825:-	92(nt)	-22.50(kcal/mol)
xxx-m0039-5p	GCAACGCCCUCGACCUAUUCUC	xxx-m0039	CAUCGGGGGAGCAACGCCCUCGACCUAUUCUCAAACUUUAAAUAGGUAGGAUGGUGUGGCUGCUCUGUUGA	NW_013657494.1:27181:27251:+	71(nt)	-28.40(kcal/mol)
xxx-m0040-5p	CUUUUCAACCAAGCGCGAUGAC	xxx-m0040	GCGCCACUGGCUUUUCAACCAAGCGCGAUGACCAAUUGUGCGAAUCAACGGUUCCUCUCGUACUAGGUUGAAUUACUAUUGCGACA	NW_013657494.1:76699:76784:+	86(nt)	-24.10(kcal/mol)
xxx-m0044-3p	AAUAGGUAGGACGGUGUGGCUG	xxx-m0044	GGCAUCGGGGGCGCAACACCCUCGACCUAUUCUCAAAUUUUAAAUAGGUAGGACGGUGUGGCUGAUCUGUUGAG	NW_013657497.1:65574:65647:+	74(nt)	-21.70(kcal/mol)
xxx-m0048-3p	UUCGGAUAUGAAGUCUCAUUC	xxx-m0048	AUCAAGUUUUGAAUGACUUUCUAGUCAGAUCGUUCCUGCGUUUCGGAUAUGAAGUCUCAUUCGAAGCUUUAG	NW_013657516.1:37212:37283:-	72(nt)	-21.20(kcal/mol)
xxx-m0049-3p	AAAAUCCGGAGGACCGAGUGCC	xxx-m0049	UGGCUGGAAGAGCACCGCACGUCACGUGGAGUCCGGUGCGCCCCUGGCGGCCCUUUAAAAUCCGGAGGACCGAGUGCCUUCCUUGCCC	NW_013657528.1:88844:88931:-	88(nt)	-34.70(kcal/mol)
xxx-m0002-5p	GCUUUCGGUUGCUGUCCGUCC	xxx-m0002	CAACAACGGAGCUUUCGGUUGCUGUCCGUCCUCUGUCCUCGCAGCUCAACGUCAAUGGCAGCUCAAAUCCCUCCGUCAACC	NC_016407.2:37807782:37807862:-	81(nt)	-22.80(kcal/mol)
xxx-m0003-5p	GCUACUGCAGUUUUCUUGAUCU	xxx-m0003	UGUUGCAGCUGCUACUGCAGUUUUCUUGAUCUACCCAAUUGGUCAAGGAAGCUUUUCAGAUGGUAUGCCUCUAGG	NC_016407.2:38650894:38650968:-	75(nt)	-23.90(kcal/mol)
xxx-m0004-5p	CGGUGGAGCGGUGAAAUGCGUAGA	xxx-m0004	AGGGAAUUUCCGGUGGAGCGGUGAAAUGCGUAGAGAUCGGAAGGAACACCAAUGGCGAAAGCGACAUUUUCCAUCGCUCUCGGUUCACCA	NC_016407.2:43192319:43192408:-	90(nt)	-25.70(kcal/mol)
xxx-m0005-3p	UUCGAAUCCCCUGCCGAUGUGAGG	xxx-m0005	CAACGUCGGUUGUCUAGUUGGUAAGGAUUCAACUCAGCUCCCACAAGGACCUGAGUUCGAAUCCCCUGCCGAUGUGAGGACCAAAUACC	NC_016407.2:43369744:43369832:-	89(nt)	-39.40(kcal/mol)
xxx-m0006-5p	GUUGACCGCUCAUACGACCCCUG	xxx-m0006	CAUGGUCAUUGUUGACCGCUCAUACGACCCCUGCAAUUGCAUUGCAGCUUAUGCAAGGGUCGUAUAACGGUCAACAGAAACCCUUGA	NC_016408.2:5939265:5939351:+	87(nt)	-40.40(kcal/mol)
xxx-m0007-3p	UGGGAAGCUGCAUCCGUUGAUG	xxx-m0007	UGGUGCCAUUAUUCCUACUUCUGCGGCUAUCGGUUUGCACUUUUACCCAAUAUGGGAAGCUGCAUCCGUUGAUGAAUGGUUAUA	NC_016408.2:37873475:37873558:-	84(nt)	-20.10(kcal/mol)
xxx-m0009-3p	UUUAUUGUGACCCAAAAACCUA	xxx-m0009	AGCCCAGGUUUAACGAUGGAAUAUGAGGUAGUUGGGGAGGAUAGAUAAGACUGCUAGUUGCUCGAUCAGGACCCUAGAUUUAUUGUGACCCAAAAACCUAUUCCAGGGGC	NC_016409.2:50568170:50568279:-	110(nt)	-26.80(kcal/mol)
xxx-m0010-5p	GACCAAACCAGCCGCGGCUUCC	xxx-m0010	CUACUACCUGGACCAAACCAGCCGCGGCUUCCACACAAAGCCUUUUGUUUAAAGGCUUUGUGUGGAAGCCACGACCGGUUUGGUCCGGGUAGUAGA	NC_016410.2:4925725:4925820:+	96(nt)	-77.30(kcal/mol)
xxx-m0011-3p	AUCCCUAACUAGUAGUUAUC	xxx-m0011	UAGCGCAGCUUGGUAGCGCGUUUGUUUUGGGUACAAAAUGUCACAGGUUCAAAUCCUGUCAUCCCUAUCCCUAACUAGUAGUUAUCGUAUCAGCAG	NC_016410.2:18053689:18053784:+	96(nt)	-20.30(kcal/mol)
xxx-m0012-3p	AGGGCAGAGGCCUUUGGUGU	xxx-m0012	CAACAUGAAAAAACCAAAACCUCUGUCCCCCAUCCCUUGAAUAGCUAGGAAGGGCAGAGGCCUUUGGUGUCCUCUCCAGU	NC_016410.2:18193311:18193390:+	80(nt)	-22.50(kcal/mol)
xxx-m0013-3p	GUCGCUGAUCUCUCUGGUUGGG	xxx-m0013	ACAUGAACAAAGAUUCCAACAAGACUCUCAGAUGGUGCAAAGAUGGAGGGAAGCUCUAAUACAAGUCGCUGAUCUCUCUGGUUGGGAUCUACAUGA	NC_016410.2:31496488:31496583:+	96(nt)	-24.80(kcal/mol)
xxx-m0014-3p	UGGACGGCCAUGAGACACACAUUU	xxx-m0014	UCUCUCCUCCGUUGGUGCUUGUCUCAUAUUCCAUCUCCUUGUAGAGCUGCGUUGCUGCCUUUACUUCUUUGGACGGCCAUGAGACACACAUUUUUUCCCAUAU	NC_016410.2:55540015:55540117:+	103(nt)	-21.00(kcal/mol)
xxx-m0015-5p	AUUGAUGGUAUUCGUGAGCC	xxx-m0015	UCCAGUAGUUAUUGAUGGUAUUCGUGAGCCUGUUUCUGGAUCUCAACUUUACGGAAAUAAUAUUAUUUAUGGUGCCAUUGUUCCUACUUCU	NC_016410.2:525604:525694:-	91(nt)	-20.50(kcal/mol)
xxx-m0017-3p	AAGGGCAGAGGCCUUUGGUGUC	xxx-m0017	UGACAACAUGAAAAAACCAAAACCUCUGUCCCCCAUCCCUUGAAUAGCUAGGAAGGGCAGAGGCCUUUGGUGUCCUCUCCAGUC	NC_016411.2:2234620:2234703:+	84(nt)	-23.50(kcal/mol)
xxx-m0020-5p	UCUAAUCUCUGUUCCCAAUUAC	xxx-m0020	CCUUGAAUUCUCUAAUCUCUGUUCCCAAUUACACUUAAUCCAUGAAAAGAUCAAGUGAGUUUGGGAUCAGAAAUUAGAGAUAUCAAUA	NC_016411.2:42295745:42295832:-	88(nt)	-33.90(kcal/mol)
xxx-m0022-5p	CAUUUAGUUCAGUGGACGUGUG	xxx-m0022	CACUCCGUUGCAUUUAGUUCAGUGGACGUGUGAUCAUAUGUGCAAGUCCAUCUGACCUAGCGACGACAAC	NC_016413.2:31290770:31290839:-	70(nt)	-23.60(kcal/mol)
xxx-m0025-5p	ACAUGAGAUGGGUUAGACCC	xxx-m0025	GAACAAGUGGACAUGAGAUGGGUUAGACCCAAACCCGAUCCUAACUUAGACCAAAUCAAUUAUGGGUCAUGAUAACUUGUGUUAUAAAAACACAUGUUA	NC_016414.2:14441574:14441672:-	99(nt)	-20.70(kcal/mol)
xxx-m0026-5p	UUCGGAUUGCGGCGACGUGGGC	xxx-m0026	CGGUGAAGUGUUCGGAUUGCGGCGACGUGGGCGGUCCGCUGCCUGCGACGUUGUGAGAAGUCCACUGAACCU	NW_013657243.1:7868:7939:+	72(nt)	-33.60(kcal/mol)
xxx-m0027-3p	UGUGAGAAGUCCACUGAACCUUA	xxx-m0027	GAUUGAAUGGUCCGGUGAAGUGUUCGGAUUGCGGCGACGUGGGCGGUCCGCUGCCUGCGACGUUGUGAGAAGUCCACUGAACCUUAUCAUUUAGAG	NW_013657397.1:25467:25562:+	96(nt)	-40.20(kcal/mol)
xxx-m0029-5p	CAAUUGGUCAUCGCGCUUGGU	xxx-m0029	UUGAUUCGCACAAUUGGUCAUCGCGCUUGGUUGAAAAGCCAGUGGCGCGAAGCUACCGUGCGUUGGAUUAU	NW_013657494.1:37412:37482:-	71(nt)	-26.70(kcal/mol)
xxx-m0033-3p	UUCGGAUAUGAAGUCUCAUUC	xxx-m0033	AUCAAGUUUUGAAUGACUUUCUAGUCAGAUCGUUCCUGCGUUUCGGAUAUGAAGUCUCAUUCGAAGCUUUAG	NW_013657516.1:37212:37283:-	72(nt)	-21.20(kcal/mol)
xxx-m0034-3p	AAAAUCCGGAGGACCGAGUGCCUU	xxx-m0034	UCCAGUGGCUGGAAGAGCACCGCACGUCACGUGGAGUCCGGUGCGCCCCUGGCGGCCCUUUAAAAUCCGGAGGACCGAGUGCCUUCCUUGCCCGG	NW_013657528.1:88842:88936:-	95(nt)	-35.40(kcal/mol)
xxx-m0001-3p	GGAUGUCCUGGGUUCAAACCUG	xxx-m0001	GCAUGUGGUUGGGGGUGGGGGGUUGGGACGUUGGGUAGCUUAAUUGGUUUGAGUUAAGGGAUAAGGACUUGGAUGUCCUGGGUUCAAACCUGAACGAAUAAG	NC_016407.2:6871167:6871268:+	102(nt)	-27.60(kcal/mol)
xxx-m0002-3p	ACGUAUCACCGGUCUUAGGCAAU	xxx-m0002	UCUUGGGAUCAAAGUCUAAAGCCGGUUGACUAUCAACCCGCCGUCUUUUGGGAACGUAUCACCGGUCUUAGGCAAUUUAAUACACG	NC_016407.2:8651254:8651339:+	86(nt)	-22.30(kcal/mol)
xxx-m0003-5p	GUUGACCGCUCAUACGACCCCUG	xxx-m0003	CAUGGUCAUUGUUGACCGCUCAUACGACCCCUGCAAUUGCAUUGCAGCUUAUGCGGGGGUCGUAUAACGGUCAACAGAGACUCUUGA	NC_016407.2:10223355:10223441:+	87(nt)	-49.10(kcal/mol)
xxx-m0004-5p	GUUGACCGCUCAUACGACCCCUG	xxx-m0004	CAUGGUCAUUGUUGACCGCUCAUACGACCCCUGCAAUUGCAUUGCAGCUUAUGCGGGAGUCGUAUAAAGGUCAACAGAGACCCUUGA	NC_016407.2:12525093:12525179:+	87(nt)	-42.70(kcal/mol)
xxx-m0011-3p	CGUGGUGGCUGAUGCUGGUUUUU	xxx-m0011	UCGUUUGGCUAGAGGUGUGCGGUGGUGGCUGAUGAGAGGGUCAGUGGGGUUUAUUGGUUUUCGUGGUGGCUGAUGCUGGUUUUUGGUGAGGAUU	NC_016407.2:8039226:8039319:-	94(nt)	-23.60(kcal/mol)
xxx-m0012-5p	UUAUCCGCAGGAAUACCUGAGGA	xxx-m0012	CGGCUGAAAUUUAUCCGCAGGAAUACCUGAGGAUUUUCAUGCGGUUAUCAUUAUACUAUGGUCACUUCCUGCGGGUAACUGUAUCUUCUGCUGA	NC_016407.2:17965011:17965104:-	94(nt)	-28.30(kcal/mol)
xxx-m0013-5p	UUGACCGCUCAUACGACCCCUGC	xxx-m0013	AUGGUCAUUGUUGACCGCUCAUACGACCCCUGCAAUUGCAUUGCAGCUUAUGCGGGGGUCGUAUAACGGUCAACAGAGACCCU	NC_016407.2:18276787:18276869:-	83(nt)	-50.90(kcal/mol)
xxx-m0014-5p	CUGGUGGAGAGUGGAUGUCACUG	xxx-m0014	ACUUCAGCUUCUGGUGGAGAGUGGAUGUCACUGCCCCAAAGUCAUGAAUCCAUGGUCUGCCAAGUAAACAGCUGAAAG	NC_016407.2:22487390:22487467:-	78(nt)	-25.30(kcal/mol)
xxx-m0015-5p	UCUGAUGGCUCUGACUUUGUCGG	xxx-m0015	CAGGCAUUUCUCUGAUGGCUCUGACUUUGUCGGGAUCAACUUCAAUACCCUUUUGACUGACGAUAAAGCCUAGGAGUUUACCAGAUCUGA	NC_016407.2:22489162:22489251:-	90(nt)	-20.50(kcal/mol)
xxx-m0016-5p	UUGUUCUGUCUGUUCAGGUGCU	xxx-m0016	ACAGUCUCUUUUGUUCUGUCUGUUCAGGUGCUCUGUACCCACCCAAUCGUGCAGUUGCAUGAACAGGGUUUAACAGUAGUGACAAC	NC_016407.2:26890441:26890526:-	86(nt)	-27.50(kcal/mol)
xxx-m0019-5p	CGGUGGAGCGGUGAAAUGCGUAGA	xxx-m0019	AGGGAAUUUCCGGUGGAGCGGUGAAAUGCGUAGAGAUCGGAAGGAACACCAAUGGCGAAAGCGACAUUUUCCAUCGCUCUCGGUUCACCA	NC_016407.2:43192319:43192408:-	90(nt)	-25.70(kcal/mol)
xxx-m0021-3p	CAGUCUAUCUGGGGUGACCUGGCC	xxx-m0021	GAUUCUUUACCGCUGGCGUUAACCCUUGAUUCUGCCAUAUUGCCAAUUUUUUGACAGUCUAUCUGGGGUGACCUGGCCGAGUAUGAAU	NC_016408.2:43282776:43282863:+	88(nt)	-21.60(kcal/mol)
xxx-m0022-5p	AAGUGUCGUGUCGGUGUUUGACAC	xxx-m0022	GUGUAAUUAUAAGUGUCGUGUCGGUGUUUGACACGACACGUGUCAGACAUCGAGACACGUCUAAUUUAAG	NC_016408.2:5891733:5891802:-	70(nt)	-29.60(kcal/mol)
xxx-m0023-5p	UUUGUGUAUGGUGCUCCUGGAA	xxx-m0023	GAAGAAUCCAUUUGUGUAUGGUGCUCCUGGAAGUAAGAUUAUUGUAACAACAAGAAUUGCUCACGUGGCAUCAAUUAUGCAGACUGUUGAGCCUUA	NC_016408.2:25743894:25743989:-	96(nt)	-21.40(kcal/mol)
xxx-m0024-3p	UUAAAGGACUCGUUGUCUGUAU	xxx-m0024	UAAUCAGUAAAGUAUAUUAUAUAGAUAAUGAAUACUGAUAAUGAGCUAAGUAACACAUUUAACUCCACAAUUAAAGGACUCGUUGUCUGUAUAAGCUGAAAG	NC_016408.2:30603084:30603185:-	102(nt)	-22.80(kcal/mol)
xxx-m0026-5p	GAUAUGAGGGCGUGGGCUUGUG	xxx-m0026	ACAACAUUUUGAUAUGAGGGCGUGGGCUUGUGUGUCUGAGGAUUUUGAUAUUUUGAGAGUAACCAAGUCUCUCCUUGAAUCGGUCACUUCC	NC_016409.2:9849774:9849864:+	91(nt)	-21.20(kcal/mol)
xxx-m0027-5p	UUAGGUGCUCUGAUACGUAACGGG	xxx-m0027	ACGUGUGUCUUUAGGUGCUCUGAUACGUAACGGGAUGAGAACUUUGUUAUUGCUUUUAUAUUCCUUACGUAUUGUUUUUGAAGAUUUAUGA	NC_016409.2:17349298:17349388:+	91(nt)	-24.30(kcal/mol)
xxx-m0030-3p	UAUAGUACCCAUUGCUGCCAAU	xxx-m0030	UUGAGAACAGCUGUUGGUUAAGCAAGGAGUAUGGUAACACAUUUUGUUGUAUAGUACCCAUUGCUGCCAAUCUCAACUCAG	NC_016409.2:43033313:43033393:-	81(nt)	-21.20(kcal/mol)
xxx-m0032-3p	GUCGCUGAUCUCUCUGGUUGGG	xxx-m0032	ACAUGAACAAAGAUUCCAACAAGACUCUCAGAUGGUGCAAAGAUGGAGGGAAGCUCUAAUACAAGUCGCUGAUCUCUCUGGUUGGGAUCUACAUGA	NC_016410.2:31496488:31496583:+	96(nt)	-24.80(kcal/mol)
xxx-m0033-3p	GUCACCUACCGUAGGAGACAUG	xxx-m0033	UAGAGAGGGCUCCGUUUCCGGUAGGAGACCUGAAUAGGUCACCUACCGUAGGAGACAUGGCUAUUUUUU	NC_016410.2:56395476:56395544:+	69(nt)	-29.70(kcal/mol)
xxx-m0034-3p	CUUUGUGUGGAAGCCGCGGCUG	xxx-m0034	CGGACCAAACCGGUCGUGGCUUCCACACAAAGCCUUUAAACAAAAGGCUUUGUGUGGAAGCCGCGGCUGGUUUGGUCCA	NC_016410.2:4925733:4925811:-	79(nt)	-71.30(kcal/mol)
xxx-m0036-5p	UAUGUGCUUCACUAGAUCUGCUU	xxx-m0036	ACUUUGUCCAUAUGUGCUUCACUAGAUCUGCUUGCAAUUCGUGAUGAACAUUUGGAUCACGCAACUCGGAUCUAGCACGCACAUGAUUUGCAAAAGUG	NC_016410.2:16174584:16174681:-	98(nt)	-29.30(kcal/mol)
xxx-m0037-5p	AUGUCGGCCGGGGUGAGAGGCAU	xxx-m0037	GACCUAAUCAAUGUCGGCCGGGGUGAGAGGCAUGAUCCUUUGAGACCAAAGAGCUUUCUCGGUGUUUGCCUUGGAGAAUACGGAUUUGGGUA	NC_016410.2:17304880:17304971:-	92(nt)	-23.90(kcal/mol)
xxx-m0038-5p	CGACCACGACCACGACCAUGACC	xxx-m0038	GGAAUGACCACGACCACGACCACGACCAUGACCACGACCGCGACCACGAGCUUCUCCAAAAUGGUUGUGUUGUGAUGCAUUCG	NC_016410.2:42406803:42406885:-	83(nt)	-21.60(kcal/mol)
xxx-m0040-5p	CAUCUGCUGCCACACCAUAUGCU	xxx-m0040	UCAUCGACCGCAUCUGCUGCCACACCAUAUGCUAACAUUCGCAUUGUUGUGGUACAUUUUGCUAACGGUGAU	NC_016410.2:53182832:53182903:-	72(nt)	-23.90(kcal/mol)
xxx-m0042-5p	UCAGUGCACGAUGUUUGCAG	xxx-m0042	GUAAGGAGUUUCAGUGCACGAUGUUUGCAGAGAACUUCAUUGUUAGAAACUCUAAAGCAAGUCUAUAAAUAUCGUGCACUGAAUCUCUUUUACA	NC_016411.2:15342296:15342389:+	94(nt)	-38.20(kcal/mol)
xxx-m0043-3p	GCGGACUAGGAUGACUUUGCAAU	xxx-m0043	AUCUUGGCUCAAGCAUCAACCUCAUGCCUUUGUCUGUUGCCAAAAGAGUUGGUGACUUGUGUAUUAAGCGGACUAGGAUGACUUUGCAAUUGGCCGAUAA	NC_016411.2:20171328:20171427:+	100(nt)	-27.10(kcal/mol)
xxx-m0045-5p	AUAAUGGUGGUGUUGAAGCAUG	xxx-m0045	AGCGGUAUUGAUAAUGGUGGUGUUGAAGCAUGUGAGAUUGCGUUGAACACCCCACGUCGGUAAUGGUA	NC_016411.2:23103683:23103750:+	68(nt)	-23.40(kcal/mol)
xxx-m0046-3p	CUACGGCCGGGUGGAUGUUGAAG	xxx-m0046	CCAUGGCUCCCUUCCUCCUUCUUCCUCGGCUCCUAUCACAGUGGCUACGGCCGGGUGGAUGUUGAAGCUCAGCCUGU	NC_016411.2:28309834:28309910:+	77(nt)	-22.60(kcal/mol)
xxx-m0049-3p	UUCGUGGUAGUGGUGUGGAAU	xxx-m0049	UUGUCAACUGAGUCCAUGAUAUGAUCAUAAUAGUAUAGCGGUUGCGAACCGCUCCGCAAUUCGUGGUAGUGGUGUGGAAUCAGUUAGCGC	NC_016411.2:2327884:2327973:-	90(nt)	-30.30(kcal/mol)
xxx-m0051-5p	UGAGGUCUUGUUUUAAGGCGA	xxx-m0051	UGAGUGGCGGUGAGGUCUUGUUUUAAGGCGAGGUGAGUUGUGGCGAGACGUUGGUUGUCGUGGAGGAGGGUUUGGAUUUCGCGGUGGCGGG	NC_016411.2:30972628:30972718:-	91(nt)	-23.90(kcal/mol)
xxx-m0053-5p	UCUAAUCUCUGUUCCCAAUUAC	xxx-m0053	CCUUGAAUUCUCUAAUCUCUGUUCCCAAUUACACUUAAUCCAUGAAAAGAUCAAGUGAGUUUGGGAUCAGAAAUUAGAGAUAUCAAUA	NC_016411.2:42295745:42295832:-	88(nt)	-33.90(kcal/mol)
xxx-m0054-3p	CUACGGUCUGGCCUGCUUUGGCC	xxx-m0054	AGGUGAGUAGGGUUGGGAAUAGGCCAGACCGGCCUACAGGGGCCUACGGUCUGGCCUGCUUUGGCCUGGCCUGGCC	NC_016412.2:4173755:4173830:+	76(nt)	-41.10(kcal/mol)
xxx-m0059-5p	UUGACCGCUCAUACGACCCCUAC	xxx-m0059	AUGGUCAUUGUUGACCGCUCAUACGACCCCUACAAUUGCAUUGCAGCUUAUGCGGGGUUUGUAUAACGGUCAACAGAGACUCU	NC_016412.2:29435962:29436044:-	83(nt)	-34.10(kcal/mol)
xxx-m0060-3p	UAUGCUCCUUGGUUUAAAGAUUA	xxx-m0060	GACACACACAUUUCUUUUACCAUCAGGCGAGUGUAUGAUAACAUUGUAAGACGUUCAUAUGCUCCUUGGUUUAAAGAUUAACGGUGAACC	NC_016412.2:32633043:32633132:-	90(nt)	-21.60(kcal/mol)
xxx-m0062-5p	AACGGAGCAGUGUGAGAUUU	xxx-m0062	UCUGCCAUUAAACGGAGCAGUGUGAGAUUUUCAAUCCGCCAUCAGUAGUUGAUCCACCACGCUCUGCCCUUUUUGGCGGU	NC_016413.2:9256177:9256256:+	80(nt)	-23.50(kcal/mol)
xxx-m0063-3p	CAAAGUCUGACCUGACCUGACCU	xxx-m0063	CGGCAUAUGAUAGGCCAUAGGCAGGCUCAGGCUUGUGAUUUAUUUCGUAGACCAUACUCAGGCCUAUCAAAGUCUGACCUGACCUGACCUAUUCCCACCC	NC_016413.2:27595658:27595757:+	100(nt)	-30.40(kcal/mol)
xxx-m0065-5p	ACAAUGUGGUGGAACAUGGCUU	xxx-m0065	AGUGGGGGCAACAAUGUGGUGGAACAUGGCUUAGGAUUUGCCAGGUUGGGUUAGUGGCUGCACCAUGCUGGCCUGCCCACUC	NC_016413.2:37147500:37147581:+	82(nt)	-26.30(kcal/mol)
xxx-m0066-5p	GCAUUUGGGUCAAUGGACCUGU	xxx-m0066	UCACGCCGUUGCAUUUGGGUCAAUGGACCUGUGAUCAUAGGUGCAGGUCCAUCUGGUCUUGCAACGGCAGCA	NC_016413.2:39838972:39839043:+	72(nt)	-35.90(kcal/mol)
xxx-m0067-3p	UUGACUGCAUGCACUGGGAGUGG	xxx-m0067	UCAAAGAAUACCACAUGUUAGUGAAAUGUGGGGGUUCUCAGGGAUGAUCGAGAGUAUUGACUGCAUGCACUGGGAGUGGAAAAAUUGUC	NC_016413.2:40301396:40301484:+	89(nt)	-20.90(kcal/mol)
xxx-m0068-5p	ACGGCCUGGCCUGUUCCCACCC	xxx-m0068	CCCCUGUCGGACGGCCUGGCCUGUUCCCACCCCUAACAACACUCAAGGGAAUGGUUACGUCCCUCGGAGAUAGGAG	NC_016413.2:46374616:46374691:+	76(nt)	-24.50(kcal/mol)
xxx-m0069-5p	UUGAGAUUGCAACUCCUGGUUC	xxx-m0069	ACGCCUCCUUUUGAGAUUGCAACUCCUGGUUCAUUCAUUGUAUCAUUGCUUGCAUCUCAAGAGGAGGCUC	NC_016413.2:4285926:4285995:-	70(nt)	-33.30(kcal/mol)
xxx-m0070-3p	UGAUGUCUCUGACCGCAAGCGGA	xxx-m0070	AAAAAGCUAGAAUCCGUUAAUCGAUCGAGAGAUUGCAGCUGUUACGCUUGGUUGAUGUCUCUGACCGCAAGCGGAAUAGCCCUAU	NC_016413.2:8107432:8107516:-	85(nt)	-25.60(kcal/mol)
xxx-m0072-5p	UGGGGCGGGGUGGGGACGGG	xxx-m0072	GGCAUGGCAAUGGGGCGGGGUGGGGACGGGUUUUACCUUCCCCAUCCCCAUACCCUAUUCUCAUAUA	NC_016413.2:10996248:10996314:-	67(nt)	-34.40(kcal/mol)
xxx-m0074-3p	CUCGGAUCUAGCACGCACAUGAU	xxx-m0074	AACUUUGUCCAUAUGUGCUUCACUAGAUCUGCUUGCAAUUCGUGAUGAACAUUUGGAUCACGCAACUCGGAUCUAGCACGCACAUGAUUUGCAAAAGU	NC_016414.2:15054040:15054137:+	98(nt)	-29.10(kcal/mol)
xxx-m0075-3p	AUCCCUAACUAGUAGUUAUC	xxx-m0075	UAGCGCAGCUUGGUAGCGCGUUUGUUUUGGGUACAAAAUGUCACAGGUUCAAAUCCUGUCAUCCCUAUCCCUAACUAGUAGUUAUCGUAUCAGCAG	NC_016414.2:17652459:17652554:+	96(nt)	-20.30(kcal/mol)
xxx-m0076-3p	ACAAGAGGCUGUUUCCAGGACU	xxx-m0076	ACGCAGGGUCCGGGAAAUGGUCACAUCCUUUGGUGUAUUGUACGCAACCUUACCCUGUUUUUACACAAGAGGCUGUUUCCAGGACUUGAACCCGUG	NC_016414.2:18164793:18164888:+	96(nt)	-28.50(kcal/mol)
xxx-m0080-5p	GAUUCUGGGGUCCUCUUUUA	xxx-m0080	UUCUUUUUUGGAUUCUGGGGUCCUCUUUUACUAUUAUUCUGAUUAUUAGAUUACAUUAGAGAAACCUUAGGAUCCACACAUUCC	NC_016414.2:3639066:3639149:-	84(nt)	-22.30(kcal/mol)
xxx-m0081-3p	CUGCUGCCAUAUUUCAGAAGGU	xxx-m0081	AAGAGAAGUUAGAACUAUUGGAAUUUGGGGCAUGGGAGGCAUAGGAAAGACAACCCUUGCUGCUGCCAUAUUUCAGAAGGUAUCUUCCAUG	NC_016414.2:12421715:12421805:-	91(nt)	-22.00(kcal/mol)
xxx-m0082-5p	CAAGAUCUCCCCCUUCUGUGGC	xxx-m0082	GGGUCUUCAUCAAGAUCUCCCCCUUCUGUGGCAACUCUUACAGGAGGAGUGGUAAGUGUAAGAUCA	NC_016414.2:12933257:12933322:-	66(nt)	-20.00(kcal/mol)
xxx-m0083-3p	UAGGCACCCGAGGAGGCGCUCU	xxx-m0083	AUGUCAUGGCCCGGUGCUCCUUGAUGGAAGGCAUAGGAGAGGUUAGAUUGAUACCAAGCUGGCAACGUGUUAGGCACCCGAGGAGGCGCUCUGGUCUUGAUA	NC_016414.2:20736634:20736735:-	102(nt)	-33.60(kcal/mol)
xxx-m0084-5p	CCUGAAGAAAUAGUGCUCCUGA	xxx-m0084	UUAAAGCGCUCCUGAAGAAAUAGUGCUCCUGAAGUGAUGACGUCAUCAGAAGCAAGUUCAUCAGAAGCAAGUUUAUC	NC_016414.2:22674001:22674077:-	77(nt)	-20.90(kcal/mol)
xxx-m0086-5p	AUCUGCUCGGCCUCGGACACGA	xxx-m0086	CGGAUAGGUGAUCUGCUCGGCCUCGGACACGAAUUUCCUGACCCGCCCUUCGCGCGCGAUGUUGAGCCCGCCUGCCCCGA	NW_013655792.1:1076:1155:-	80(nt)	-26.10(kcal/mol)
xxx-m0088-3p	CAUGGUCGUGGUCGUGGUCGUGC	xxx-m0088	GGUCGCGAUGGGCCGCCGUAUGCGCACCGUGAUCGUGAUGCUCAUCGUCGUGAUCAUGGUCGUGGUCGUGGUCGUGCCCAUGAUGAU	NW_013656059.1:1178:1264:-	87(nt)	-41.00(kcal/mol)
xxx-m0089-3p	UUCCUGGUCUUUCUCUUUUGAA	xxx-m0089	GAGCCUGAUGAUUUAGAUUGAAUUGCGGAUGUGCCUGUCGUCGAGGAUGACCUUUCACCAUAUUCACUUCCUGGUCUUUCUCUUUUGAAUUGCCGGCGG	NW_013656353.1:2305:2403:-	99(nt)	-21.50(kcal/mol)
xxx-m0091-5p	ACGUUUGUUGCUGACUGCUGUA	xxx-m0091	AUGCUCCUUCACGUUUGUUGCUGACUGCUGUAAAUCUGGAGGCCUACUCGAAGGCGCAAAGGAAAUAGUUGGUCAUAGCAAGAUUGGAUCUA	NW_013657209.1:6734:6825:-	92(nt)	-22.50(kcal/mol)
xxx-m0092-3p	CCGACGUGGUUUGGCCUGAGCA	xxx-m0092	UCGGUAUGACCUUAAUAAUACAGAUGCGCAAGCGCGCGCGAGGAAUUUUGGCCUACGGGACGCCUCCCGACGUGGUUUGGCCUGAGCACGGGUUCCCG	NW_013657397.1:33581:33678:+	98(nt)	-28.60(kcal/mol)
xxx-m0094-5p	CUUUUCAACCAAGCGCGAUGAC	xxx-m0094	GCGCCACUGGCUUUUCAACCAAGCGCGAUGACCAAUUGUGCGAAUCAACGGUUCCUCUCGUACUAGGUUGAAUUACUAUUGCGACA	NW_013657494.1:20963:21048:+	86(nt)	-24.10(kcal/mol)
xxx-m0095-5p	CUUUUCAACCAAGCGCGAUGAC	xxx-m0095	GCGCCACUGGCUUUUCAACCAAGCGCGAUGACCAAUUGUGCGAAUCAACGGUUCCUCUCGUACUAGGUUGAAUUACUAUUGCGACA	NW_013657494.1:24202:24287:+	86(nt)	-24.10(kcal/mol)
xxx-m0098-5p	CAAUUGGUCAUCGCGCUUGGUU	xxx-m0098	UUGAUUCGCACAAUUGGUCAUCGCGCUUGGUUGAAAAGCCAGUGGCGCGAAGCUACCGUGCGUUGGAUUAU	NW_013657497.1:12370:12440:-	71(nt)	-26.70(kcal/mol)
xxx-m0100-3p	UUUGAUCCUUCGAUGUCGGC	xxx-m0100	CACAGGGAUAACUGGCUUGUGGCAUCCAAGCGUUCAUAGCGACGUUGCUUUUUGAUCCUUCGAUGUCGGCUAUUCCUAUC	NW_013657497.1:43796:43875:-	80(nt)	-21.60(kcal/mol)
xxx-m0101-3p	ACGGAGGUGUGCGAAGGUAGGCUC	xxx-m0101	UGCGAGGUGGGUAGUUUAUCUGGGGCGGAUGCCUCCUAAAGAGUAACGGAGGUGUGCGAAGGUAGGCUCAAGCUAAGAU	NW_013657516.1:7984:8062:+	79(nt)	-24.90(kcal/mol)
xxx-m0104-3p	AAAAUCCGGAGGACCGAGUGCC	xxx-m0104	UGGCUGGAAGAGCACCGCACGUCACGUGGAGUCCGGUGCGCCCCUGGCGGCCCUUUAAAAUCCGGAGGACCGAGUGCCUUCCUUGCCC	NW_013657528.1:88844:88931:-	88(nt)	-34.70(kcal/mol)
xxx-m0105-5p	CACGUCGGGAGCACGUGCUCGG	xxx-m0105	UGGGCCAAAUCACGUCGGGAGCACGUGCUCGGGCCAAACCACGUCGGGGGGCAGAAAUUCCUCGAGCGCGCCUGCGCGCCCGUGUUAUUAAGGUCAU	NW_013657528.1:96002:96098:-	97(nt)	-34.70(kcal/mol)
xxx-m0001-5p	AUGUGCGUGCUAGAUCCGAGUUG	xxx-m0001	UUUGCAAAUCAUGUGCGUGCUAGAUCCGAGUUGCGUGAUCCAAAUGUUCAUCACGAAUUGCAAGCAGAUCUAGUGAAGCACAUAUGGACAAAG	NC_016407.2:2477897:2477989:+	93(nt)	-25.10(kcal/mol)
xxx-m0002-3p	ACGUAUCACCGGUCUUAGGCAAU	xxx-m0002	UCUUGGGAUCAAAGUCUAAAGCCGGUUGACUAUCAACCCGCCGUCUUUUGGGAACGUAUCACCGGUCUUAGGCAAUUUAAUACACG	NC_016407.2:8651254:8651339:+	86(nt)	-22.30(kcal/mol)
xxx-m0005-5p	AUUUGGGUCAUUUAAUCGGUUG	xxx-m0005	AACUUAAUGCAUUUGGGUCAUUUAAUCGGUUGGGAAAUCGUCGAUUAAACGAUCCAAUCGACUUUGUGAUUAUAUAAAUGUUUGGGAA	NC_016407.2:36084121:36084208:+	88(nt)	-24.00(kcal/mol)
xxx-m0006-5p	UGUGGCUGCUCAAUGCUGUU	xxx-m0006	UCCGAAAACUUGUGGCUGCUCAAUGCUGUUUUGCUGCUUCGGUAUGGGACAGUUGUGACCAAGUGGCCAAGAGUUUGUCUAG	NC_016407.2:1892323:1892404:-	82(nt)	-26.20(kcal/mol)
xxx-m0007-5p	UUGAGAUUGCAACUCCUGGUUC	xxx-m0007	AUGCCUCCUUUUGAGAUUGCAACUCCUGGUUCAUUCGUUGUAUCAUUGCUUGCAUCUCAAGAGGCAGCUC	NC_016407.2:22121133:22121202:-	70(nt)	-24.20(kcal/mol)
xxx-m0008-5p	UCUGAUGGCUCUGACUUUGUCGG	xxx-m0008	CAGGCAUUUCUCUGAUGGCUCUGACUUUGUCGGGAUCAACUUCAAUACCCUUUUGACUGACGAUAAAGCCUAGGAGUUUACCAGAUCUGA	NC_016407.2:22489162:22489251:-	90(nt)	-20.50(kcal/mol)
xxx-m0009-3p	UCAGAAGGCAGGUCCUCGUCU	xxx-m0009	UUAAUUUAGCAGACAGGCUCGUAGCUUCCAGAGGAUUGGAUUCAUCAUGGAAUGUAUUCAAGGCAUCAGAAGGCAGGUCCUCGUCUGUUUUAUUUC	NC_016407.2:43002009:43002104:-	96(nt)	-23.20(kcal/mol)
xxx-m0010-5p	UUUGGAGGCGCUGCUGGUAUGA	xxx-m0010	UGGUACUUCAUUUGGAGGCGCUGCUGGUAUGACUGGGUGGAUCAAUGGUGGAUCUACCGGAAAUGUACUUAUUGGUGCUGCAAGAGUACAA	NC_016408.2:17217095:17217185:+	91(nt)	-29.60(kcal/mol)
xxx-m0011-3p	CAAGCUGGUAUCUGUAGGUGG	xxx-m0011	CAGCAACAAGCAAAGCCUGGAUGGUGGCUGCAAGUGUUGGAGUUGUGGAAGCUUUGAAAGAUCAAGCUGGUAUCUGUAGGUGGAACUAUGCUU	NC_016408.2:38024931:38025023:+	93(nt)	-24.10(kcal/mol)
xxx-m0012-5p	UUGAGAUUGCAACUCCUGGUUC	xxx-m0012	ACGCCUCCUUUUGAGAUUGCAACUCCUGGUUCAUUCGUUGUAUCAUUGCUUGCAUCUCAAGAGGCAGCUC	NC_016408.2:38847457:38847526:+	70(nt)	-24.40(kcal/mol)
xxx-m0013-5p	AAGUGUCGUGUCGGUGUUUGACAC	xxx-m0013	GUGUAAUUAUAAGUGUCGUGUCGGUGUUUGACACGACACGUGUCAGACAUCGAGACACGUCUAAUUUAAG	NC_016408.2:5891733:5891802:-	70(nt)	-29.60(kcal/mol)
xxx-m0015-5p	UUUGUGUAUGGUGCUCCUGGAA	xxx-m0015	GAAGAAUCCAUUUGUGUAUGGUGCUCCUGGAAGUAAGAUUAUUGUAACAACAAGAAUUGCUCACGUGGCAUCAAUUAUGCAGACUGUUGAGCCUUA	NC_016408.2:25743894:25743989:-	96(nt)	-21.40(kcal/mol)
xxx-m0016-3p	UUAAAGGACUCGUUGUCUGUAU	xxx-m0016	UAAUCAGUAAAGUAUAUUAUAUAGAUAAUGAAUACUGAUAAUGAGCUAAGUAACACAUUUAACUCCACAAUUAAAGGACUCGUUGUCUGUAUAAGCUGAAAG	NC_016408.2:30603084:30603185:-	102(nt)	-22.80(kcal/mol)
xxx-m0020-3p	GCAAUUGCAUUAACGGGUACUUG	xxx-m0020	AGGGAAAGUAGGUCUAGCUUGUUGAUGUUGUUGUUGUUGUUGAACCGGCAACUGUUGUUUCAUCUGUUGAGCAAUUGCAUUAACGGGUACUUGAGGUUGACCC	NC_016409.2:15892981:15893083:+	103(nt)	-28.50(kcal/mol)
xxx-m0024-5p	UUGGGUCAUUUAAUCGGUUGGG	xxx-m0024	CUUAAUGCUUUUGGGUCAUUUAAUCGGUUGGGAAAUCGUCGAUUAAACGAUCCAAUCGACUUUGUGAUUAUUUAAAUGUUUGAGA	NC_016409.2:49434462:49434546:+	85(nt)	-20.80(kcal/mol)
xxx-m0025-5p	AAAGCCUGGACUGGCCUGAAAGCC	xxx-m0025	GGCCUAUUUAAAAGCCUGGACUGGCCUGAAAGCCUACUUCACAUUAAGGCCAUCAAAUAGUUCAUUUGGCCUACUAAAUAGGUUA	NC_016409.2:51302483:51302567:+	85(nt)	-26.30(kcal/mol)
xxx-m0028-5p	CAUCGACCGCAUCUGCUGCCACG	xxx-m0028	UUGAUGUAUUCAUCGACCGCAUCUGCUGCCACGCCAUAUGCUAACAUUCGCAUUGCUGUGGUACAUUUUGCUAACGGUGAUAUACCUUCUU	NC_016409.2:6047407:6047497:-	91(nt)	-26.20(kcal/mol)
xxx-m0029-3p	UAUAGUACCCAUUGCUGCCAAU	xxx-m0029	UUGAGAACAGCUGUUGGUUAAGCAAGGAGUAUGGUAACACAUUUUGUUGUAUAGUACCCAUUGCUGCCAAUCUCAACUCAG	NC_016409.2:43033313:43033393:-	81(nt)	-21.20(kcal/mol)
xxx-m0030-3p	UGAAACAGCUGUGUCAUGGAUG	xxx-m0030	UUAAGACUCCAAAUCUAAUGCCAGCUGUCUUUCAGUGCUUAACUGCGAUCGUUCACAGGGCUUUUGAAACAGCUGUGUCAUGGAUGGUAGGUUUUA	NC_016409.2:54369451:54369546:-	96(nt)	-29.60(kcal/mol)
xxx-m0031-5p	GUUGACCGCUCAUACGACCCCUA	xxx-m0031	CAUGGUUAUUGUUGACCGCUCAUACGACCCCUACAAUUGCGUUGCAGCUUAUGCGGGGGGUCGUAUAAUGGUCAACAGAGACCCUUGA	NC_016410.2:16684431:16684518:+	88(nt)	-41.10(kcal/mol)
xxx-m0032-3p	AUCCCUAACUAGUAGUUAUC	xxx-m0032	UAGCGCAGCUUGGUAGCGCGUUUGUUUUGGGUACAAAAUGUCACAGGUUCAAAUCCUGUCAUCCCUAUCCCUAACUAGUAGUUAUCGUAUCAGCAG	NC_016410.2:18053689:18053784:+	96(nt)	-20.30(kcal/mol)
xxx-m0033-3p	GUCGCUGAUCUCUCUGGUUGGG	xxx-m0033	ACAUGAACAAAGAUUCCAACAAGACUCUCAGAUGGUGCAAAGAUGGAGGGAAGCUCUAAUACAAGUCGCUGAUCUCUCUGGUUGGGAUCUACAUGA	NC_016410.2:31496488:31496583:+	96(nt)	-24.80(kcal/mol)
xxx-m0034-5p	GCAUCUGCUGCCACACCAUAUGC	xxx-m0034	UUCAUCGACCGCAUCUGCUGCCACACCAUAUGCUAACAUUCGCAUUGAUGUGGUACAUUUUGCUAACGGUGAU	NC_016410.2:33605409:33605481:+	73(nt)	-24.10(kcal/mol)
xxx-m0035-3p	CUUUGUGUGGAAGCCGCGGCUG	xxx-m0035	CGGACCAAACCGGUCGUGGCUUCCACACAAAGCCUUUAAACAAAAGGCUUUGUGUGGAAGCCGCGGCUGGUUUGGUCCA	NC_016410.2:4925733:4925811:-	79(nt)	-71.30(kcal/mol)
xxx-m0039-5p	UUAGGGGGCGGUUUUGUAGUUUUU	xxx-m0039	AAGGGGGGCCUUAGGGGGCGGUUUUGUAGUUUUUUUUCUUAGGGGGCCAAAAUCGCAACUUGGGAAAGUUAGGGGGUUAAAACUGCUAUUAAGCCCUUAAU	NC_016410.2:49185565:49185665:-	101(nt)	-33.80(kcal/mol)
xxx-m0041-3p	CUUUGCUCUGCUUCAUCUUUUU	xxx-m0041	UGGGAGCUUUUAACUGGAGAGGUGAGCAUUUUUGUCUCAAGCAGCAAGCUUUGCUCUGCUUCAUCUUUUUAUUUGUUUCU	NC_016411.2:9209110:9209189:+	80(nt)	-20.90(kcal/mol)
xxx-m0042-5p	UCAGUGCACGAUGUUUGCAG	xxx-m0042	GUAAGGAGUUUCAGUGCACGAUGUUUGCAGAGAACUUCAUUGUUAGAAACUCUAAAGCAAGUCUAUAAAUAUCGUGCACUGAAUCUCUUUUACA	NC_016411.2:15342296:15342389:+	94(nt)	-38.20(kcal/mol)
xxx-m0043-3p	ACGCAACUCGGAUCUAGCACACA	xxx-m0043	UUUGUCCAUAUGUGUUUCACUAGAUUUGCUUGCAAUUCGUGAUGAACAUCUGGAUCACGCAACUCGGAUCUAGCACACACUUGAUUUGC	NC_016411.2:25032753:25032841:+	89(nt)	-20.70(kcal/mol)
xxx-m0044-3p	CUACGGCCGGGUGGAUGUUGAAG	xxx-m0044	CCAUGGCUCCCUUCCUCCUUCUUCCUCGGCUCCUAUCACAGUGGCUACGGCCGGGUGGAUGUUGAAGCUCAGCCUGU	NC_016411.2:28309834:28309910:+	77(nt)	-22.60(kcal/mol)
xxx-m0048-5p	CUUAACAGGUUGGGCUGUAGGGU	xxx-m0048	AUGGCUGUGUCUUAACAGGUUGGGCUGUAGGGUACACUAAGCUGGCUUGCCCACUCCAAGUUGAGAGUUGGGCCAUG	NC_016411.2:38807414:38807490:+	77(nt)	-28.60(kcal/mol)
xxx-m0049-3p	UUCACUGCUCUGUGAAACCAGC	xxx-m0049	GCCAUAUGGGCUGAGAAUACUGCAGCCUGUGAUCCCUCCACUGUCAAGAGAAGGAAGUGUUCACUGCUCUGUGAAACCAGCCUCAUGCGGA	NC_016411.2:39310535:39310625:+	91(nt)	-26.70(kcal/mol)
xxx-m0051-3p	UUCGUGGUAGUGGUGUGGAAU	xxx-m0051	UUGUCAACUGAGUCCAUGAUAUGAUCAUAAUAGUAUAGCGGUUGCGAACCGCUCCGCAAUUCGUGGUAGUGGUGUGGAAUCAGUUAGCGC	NC_016411.2:2327884:2327973:-	90(nt)	-30.30(kcal/mol)
xxx-m0053-5p	ACUCCCUUGCUGGACCAAGAGCA	xxx-m0053	CUUGCUUAUUACUCCCUUGCUGGACCAAGAGCAGAUUGUCCUGAUACUGUUAGACCUUUGCAUCCUGCUGCAGCAGCAGAUGGUGUUGACACGUAAGG	NC_016411.2:35093948:35094045:-	98(nt)	-23.60(kcal/mol)
xxx-m0055-3p	UCAGAUCUCCUGGUCACUAGAA	xxx-m0055	UGCCCACUCCAAGUUGAGAGUUGGGCCAUGGGAUUUGGGCGAAGGCUCAGAUCUCCUGGUCACUAGAAUGGAGGGAUC	NC_016411.2:38865878:38865955:-	78(nt)	-33.30(kcal/mol)
xxx-m0056-5p	UCUAAUCUCUGUUCCCAAUUAC	xxx-m0056	CCUUGAAUUCUCUAAUCUCUGUUCCCAAUUACACUUAAUCCAUGAAAAGAUCAAGUGAGUUUGGGAUCAGAAAUUAGAGAUAUCAAUA	NC_016411.2:42295745:42295832:-	88(nt)	-33.90(kcal/mol)
xxx-m0058-5p	AUCAUGUGCGUGCUAGAUCCGAG	xxx-m0058	ACUUUUGCAAAUCAUGUGCGUGCUAGAUCCGAGUUGCGUGAUCCAAAUGUUCAUCACGAAUUGCAAGCAGAUCUAGUGAAGCACAUAUGGACAAAGUU	NC_016412.2:17960829:17960926:+	98(nt)	-25.70(kcal/mol)
xxx-m0059-3p	GUGAUUCUGACAUAUCCACCGUG	xxx-m0059	GUGUUUGGUAUCACGGUGGGUAUGCGAAAAUCACGGUGAUCCAUCGUGAUUCUGACAUAUCCACCGUGAUAUCAAACA	NC_016412.2:34197831:34197908:+	78(nt)	-49.10(kcal/mol)
xxx-m0061-3p	CGGAUUGGUGAUACGUUGACUA	xxx-m0061	ACAUGUAAACUAGUUAACAUAUUAUCGGAAUAAAGUUGAUGACAAUAUUUUUCGGAUUGGUGAUACGUUGACUAGCAUAGGUGG	NC_016412.2:12427744:12427827:-	84(nt)	-22.70(kcal/mol)
xxx-m0063-3p	AUAUGCUCCUUGGUUUAAAGAUU	xxx-m0063	ACACACACAUUUCUUUUACCAUCAGGCGAGUGUAUGAUAACAUUGUAAGACGUUCAUAUGCUCCUUGGUUUAAAGAUUAACGGUGAAC	NC_016412.2:32633044:32633131:-	88(nt)	-21.60(kcal/mol)
xxx-m0065-5p	CUUGACUGCUCGCUUAAGCGACG	xxx-m0065	GGGCAGCUUGCUUGACUGCUCGCUUAAGCGACGGAUGCUUCGCUUAAGCGACCAUUCGUCUGGACAGUGCAAAACCU	NC_016412.2:34640393:34640469:-	77(nt)	-28.70(kcal/mol)
xxx-m0066-3p	CAAAGUCUGACCUGACCUGACCU	xxx-m0066	CGGCAUAUGAUAGGCCAUAGGCAGGCUCAGGCUUGUGAUUUAUUUCGUAGACCAUACUCAGGCCUAUCAAAGUCUGACCUGACCUGACCUAUUCCCACCC	NC_016413.2:27595658:27595757:+	100(nt)	-30.40(kcal/mol)
xxx-m0067-5p	GCAUUUGGGUCAAUGGACCUGU	xxx-m0067	UCACGCCGUUGCAUUUGGGUCAAUGGACCUGUGAUCAUAGGUGCAGGUCCAUCUGGUCUUGCAACGGCAGCA	NC_016413.2:39838972:39839043:+	72(nt)	-35.90(kcal/mol)
xxx-m0068-5p	AUUGAUUUGGAAGGACGUGGUCC	xxx-m0068	UACAUUUUUUAUUGAUUUGGAAGGACGUGGUCCUUUACCUACGUAUCCGUGAGGGAUCAAAACCUCGUAGUUCGUGGUAGAAAUUGAC	NC_016413.2:46298942:46299029:+	88(nt)	-23.50(kcal/mol)
xxx-m0069-5p	UUGGGUCAUUUAAUCGGUUGGGA	xxx-m0069	CUUAAUGCUUUUGGGUCAUUUAAUCGGUUGGGAAAUCGUCGAUUAAACGAUCCAAUCGACUUUGUGAUUGUUUAAAUGUUUGAGA	NC_016413.2:3544591:3544675:-	85(nt)	-20.80(kcal/mol)
xxx-m0072-5p	UUGACCGCUCAUACGACCCCUGC	xxx-m0072	AUGGUCAUUGUUGACCGCUCAUACGACCCCUGCAAUUGUAUUGCAGUUUAUGCAGGGGUCGUAUAACGGUCAACAGAGACCUU	NC_016413.2:37998534:37998616:-	83(nt)	-51.10(kcal/mol)
xxx-m0074-5p	CAUUUGGAGAGACAUAGACAAA	xxx-m0074	UGGAAACUUUCAUUUGGAGAGACAUAGACAAAUGAAAUUAAAUGAUAAUUUAUUUCAAUGUCUAUCUCUCUCUAAAUGGAAGUGUCCAU	NC_016413.2:43956458:43956546:-	89(nt)	-42.80(kcal/mol)
xxx-m0076-5p	GUUGACCGCUCAUACGACCCCUG	xxx-m0076	CAUGGUCAUUGUUGACCGCUCAUACGACCCCUGCAAUUGCAUUGCAGCUUAUACGGGGGGUCGUAUAACGGUCAAUAGAGACCCUU	NC_016414.2:23421136:23421221:+	86(nt)	-41.70(kcal/mol)
xxx-m0078-3p	UUUGCAGGUUGAAAAUAAAAUG	xxx-m0078	GCUACUGAUAUCAUCUUAUUUUCUACGUUGCAAAGUGAAGCGUUUCACUUGGAACUGUAAUAUUAUUCACUUUGCAGGUUGAAAAUAAAAUGAUAUAAGUAG	NC_016414.2:34387161:34387262:+	102(nt)	-37.90(kcal/mol)
xxx-m0080-3p	GUUCUAUUUGGCUGCUUGUGCGC	xxx-m0080	GUGUCUACGUGUGUUUUCGGUUGCGGUCAUCUGAAACGAUUCAACAUCUCUUUUUAUUGUGUCCUACUUUUGGUUCUAUUUGGCUGCUUGUGCGCGAGUGGAUUA	NC_016414.2:39482859:39482963:+	105(nt)	-22.80(kcal/mol)
xxx-m0082-5p	GAUUCUGGGGUCCUCUUUUA	xxx-m0082	UUCUUUUUUGGAUUCUGGGGUCCUCUUUUACUAUUAUUCUGAUUAUUAGAUUACAUUAGAGAAACCUUAGGAUCCACACAUUCC	NC_016414.2:3639066:3639149:-	84(nt)	-22.30(kcal/mol)
xxx-m0083-3p	UGAUGUCUCUGACCGCAAGCGGA	xxx-m0083	AAAAAGCUAGAAUCCGUUAAUCGAUCGAGAGAUUGCAGCUGUUACGCUUGGUUGAUGUCUCUGACCGCAAGCGGAAUAGCCCUAU	NC_016414.2:9067711:9067795:-	85(nt)	-25.60(kcal/mol)
xxx-m0084-5p	CCUGAAGAAAUAGUGCUCCUGA	xxx-m0084	UUAAAGCGCUCCUGAAGAAAUAGUGCUCCUGAAGUGAUGACGUCAUCAGAAGCAAGUUCAUCAGAAGCAAGUUUAUC	NC_016414.2:22674001:22674077:-	77(nt)	-20.90(kcal/mol)
xxx-m0087-5p	AUCUGCUCGGCCUCGGACACGA	xxx-m0087	CGGAUAGGUGAUCUGCUCGGCCUCGGACACGAAUUUCCUGACCCGCCCUUCGCGCGCGAUGUUGAGCCCGCCUGCCCCGA	NW_013655792.1:1076:1155:-	80(nt)	-26.10(kcal/mol)
xxx-m0088-5p	UCAUGGUCGUGGUCGUGGUCGUG	xxx-m0088	AUCGUCGUGAUCAUGGUCGUGGUCGUGGUCGUGCCCAUGAUGAUGACCGUGCCCAUGACCAUGCCCGUGGUGAUGGCCGC	NW_013656059.1:1142:1221:-	80(nt)	-39.40(kcal/mol)
xxx-m0092-5p	UAAGUCUCUUCGGCCCAUCGAAUC	xxx-m0092	CGUUUAUAUUUAAGUCUCUUCGGCCCAUCGAAUCAAAGAUUUCAUCUUCAAAUCUCUGGACGAAGAAACUUAAAUAGGGGAA	NW_013657306.1:20708:20789:+	82(nt)	-21.00(kcal/mol)
xxx-m0094-3p	GUGUGGGAUGUUCCGUGAUGUU	xxx-m0094	AGCGGAGUCGGCGUUGUUGGAUGCUUCCAUAUGGCUGCAUGCCUCGGCAUUGUGGGGUGUGGGAUGUUCCGUGAUGUUGGUUUUUGCA	NW_013657494.1:13712:13799:+	88(nt)	-31.40(kcal/mol)
xxx-m0095-5p	AUUGGUCAUCGCGCUUGGUU	xxx-m0095	GAUUCGCACAAUUGGUCAUCGCGCUUGGUUGAAAAGCCAGUGGCGCGAAGCUACCGUGCGUUGG	NW_013657494.1:45266:45329:-	64(nt)	-26.10(kcal/mol)
xxx-m0096-5p	ACAAUUGGUCAUCGCGCUUG	xxx-m0096	GUUGAUUCGCACAAUUGGUCAUCGCGCUUGGUUGAAAAGCCAGUGGCGCGAAGCUACCGUGCGUUGGAUUAUG	NW_013657494.1:57985:58057:-	73(nt)	-26.70(kcal/mol)
xxx-m0099-5p	UAUUGUAAGUGGCAGAGUGGCC	xxx-m0099	CGCGACGGGGUAUUGUAAGUGGCAGAGUGGCCUUGCUGCCACGAUCCACUGAGAUUCAGCCCUUGUCGCU	NW_013657497.1:8896:8965:-	70(nt)	-31.90(kcal/mol)
xxx-m0101-3p	ACGGAGGUGUGCGAAGGUAGGCUC	xxx-m0101	UGCGAGGUGGGUAGUUUAUCUGGGGCGGAUGCCUCCUAAAGAGUAACGGAGGUGUGCGAAGGUAGGCUCAAGCUAAGAU	NW_013657516.1:7984:8062:+	79(nt)	-24.90(kcal/mol)
xxx-m0103-3p	GUUUGCUGGCUCAAUGCUUUGG	xxx-m0103	UUUUGCAGACGCGAGGGCAUGUGAGUGGUAGCGUGGAUGUUUGUGUUUGCUGGCUCAAUGCUUUGGCUUUGAACGG	NW_013657528.1:47745:47820:-	76(nt)	-23.70(kcal/mol)
xxx-m0001-3p	ACGUAUCACCGGUCUUAGGCAAU	xxx-m0001	UCUUGGGAUCAAAGUCUAAAGCCGGUUGACUAUCAACCCGCCGUCUUUUGGGAACGUAUCACCGGUCUUAGGCAAUUUAAUACACG	NC_016407.2:8651254:8651339:+	86(nt)	-22.30(kcal/mol)
xxx-m0003-5p	UGGGUCAUUUAAUCGGUUGGGA	xxx-m0003	UUAAUGCAUUUGGGUCAUUUAAUCGGUUGGGAAAUCGUCGAUUAAACGAUCCAAUCGACUUUGUGAUUAUAUAAAUGUUUGGG	NC_016407.2:36084124:36084206:+	83(nt)	-21.60(kcal/mol)
xxx-m0004-5p	UCAUCGACCGCAUCUGCUGCCAC	xxx-m0004	UUCGAUGUAUUCAUCGACCGCAUCUGCUGCCACACCAUAUGCUAACAUUCACAUUGUUGUGGUACAUUUUGCUAACGGUGAUAUACCUUCUUU	NC_016407.2:51521457:51521549:+	93(nt)	-22.40(kcal/mol)
xxx-m0005-5p	UCUGAUGGCUCUGACUUUGUCGG	xxx-m0005	CAGGCAUUUCUCUGAUGGCUCUGACUUUGUCGGGAUCAACUUCAAUACCCUUUUGACUGACGAUAAAGCCUAGGAGUUUACCAGAUCUGA	NC_016407.2:22489162:22489251:-	90(nt)	-20.50(kcal/mol)
xxx-m0007-5p	UUUGGAGGCGCUGCUGGUAUGA	xxx-m0007	UGGUACUUCAUUUGGAGGCGCUGCUGGUAUGACUGGGUGGAUCAAUGGUGGAUCUACCGGAAAUGUACUUAUUGGUGCUGCAAGAGUACAA	NC_016408.2:17217095:17217185:+	91(nt)	-29.60(kcal/mol)
xxx-m0008-5p	AAGCCUGGACUGGCCUGAAAGCCU	xxx-m0008	GCCUAUUUAAAAGCCUGGACUGGCCUGAAAGCCUACUUACAAGCCUACUUCACAUUAAGGUCAUCAAAUAGUUCAUUUGGCAUACUAAAUAGGUU	NC_016408.2:2994950:2995044:-	95(nt)	-23.20(kcal/mol)
xxx-m0009-5p	AAGUGUCGUGUCGGUGUUUGACAC	xxx-m0009	GUGUAAUUAUAAGUGUCGUGUCGGUGUUUGACACGACACGUGUCAGACAUCGAGACACGUCUAAUUUAAG	NC_016408.2:5891733:5891802:-	70(nt)	-29.60(kcal/mol)
xxx-m0010-3p	UUAAAGGACUCGUUGUCUGUAU	xxx-m0010	UAAUCAGUAAAGUAUAUUAUAUAGAUAAUGAAUACUGAUAAUGAGCUAAGUAACACAUUUAACUCCACAAUUAAAGGACUCGUUGUCUGUAUAAGCUGAAAG	NC_016408.2:30603084:30603185:-	102(nt)	-22.80(kcal/mol)
xxx-m0012-5p	AUUGCCCAUCUUUCGGACGUACU	xxx-m0012	UGUCUUUGUAAUUGCCCAUCUUUCGGACGUACUUGAUGAUGUGGUUCUGGGGACAAGUUAGCCCGUUGUAUCGGUCGAAAUAUGGGAUUUUGAACUUCUUAGGGACAU	NC_016409.2:14447917:14448024:+	108(nt)	-25.40(kcal/mol)
xxx-m0014-5p	GAAAAACCGCCGGCAGUUAACUGC	xxx-m0014	ACUACCGUUGGAAAAACCGCCGGCAGUUAACUGCCGCUAGACCCAGCGGUUGUUAACUACCGCUGAAUUCCUUUCUUCAC	NC_016409.2:44809861:44809940:+	80(nt)	-25.70(kcal/mol)
xxx-m0015-5p	AAUUCCGGUUUUAGUCCCUGUAA	xxx-m0015	AAUAUUAGCGAAUUCCGGUUUUAGUCCCUGUAAAAAUCUAAAUCUUUUUUUUACAGGGACUAAAACCGAAAUUCGCUAAUAUUA	NC_016409.2:27946134:27946217:-	84(nt)	-49.90(kcal/mol)
xxx-m0016-3p	UAUAGUACCCAUUGCUGCCAAU	xxx-m0016	UUGAGAACAGCUGUUGGUUAAGCAAGGAGUAUGGUAACACAUUUUGUUGUAUAGUACCCAUUGCUGCCAAUCUCAACUCAG	NC_016409.2:43033313:43033393:-	81(nt)	-21.20(kcal/mol)
xxx-m0017-3p	AUUCGACUCUAACUGGAUGGUC	xxx-m0017	CAUCAUUUGAAAAUGGAGUGUCCAGUAGUUGAAUCAUAUCUAGCACUCGAGAUUCGACUCUAACUGGAUGGUCAGCAAUGAAC	NC_016410.2:4135706:4135788:+	83(nt)	-22.50(kcal/mol)
xxx-m0019-3p	GUCGCUGAUCUCUCUGGUUGGG	xxx-m0019	ACAUGAACAAAGAUUCCAACAAGACUCUCAGAUGGUGCAAAGAUGGAGGGAAGCUCUAAUACAAGUCGCUGAUCUCUCUGGUUGGGAUCUACAUGA	NC_016410.2:31496488:31496583:+	96(nt)	-24.80(kcal/mol)
xxx-m0020-3p	UUGACUGCAUGCACUGGGAGUG	xxx-m0020	UGCAAAGGAUACUACAUGUUAGUGAAAUGCGCGGGUUCCCAUGAAUGAUCGGGAGUAUUGACUGCAUGCACUGGGAGUGGAAAAAUUGU	NC_016410.2:28446050:28446138:-	89(nt)	-20.50(kcal/mol)
xxx-m0022-3p	CUACGGCCGGGUGGAUGUUGAAG	xxx-m0022	CCAUGGCUCCCUUCCUCCUUCUUCCUCGGCUCCUAUCACAGUGGCUACGGCCGGGUGGAUGUUGAAGCUCAGCCUGU	NC_016411.2:28309834:28309910:+	77(nt)	-22.60(kcal/mol)
xxx-m0023-3p	UUGAUGUCUCUGACCGCAAGCGG	xxx-m0023	AAAAGCUAGAAUCCGUUAAUCGAUCGAGAGAUUGCAGCUGACGCUUGGUUGAUGUCUCUGACCGCAAGCGGAAUAGCCCUA	NC_016411.2:31846487:31846567:+	81(nt)	-26.00(kcal/mol)
xxx-m0026-3p	UUCACUGCUCUGUGAAACCAGC	xxx-m0026	GCCAUACGGGCUGAGAAUACAGCAGCCUGUGAUCCCUCCACUGUCAAGAGAAGGAAGUGUUCACUGCUCUGUGAAACCAGCCUCAUGCGGA	NC_016411.2:38848803:38848893:+	91(nt)	-27.00(kcal/mol)
xxx-m0028-3p	UUUGAUUGCAGCUUUCUAGUU	xxx-m0028	UUGGUGGUUUAAUUAGAAGAGGUGAUGAAGUUGUGUAAUUUGAUUGCAGCUUUCUAGUUGUUGCCACUA	NC_016411.2:1515213:1515281:-	69(nt)	-23.30(kcal/mol)
xxx-m0029-3p	UUCGUGGUAGUGGUGUGGAAU	xxx-m0029	UUGUCAACUGAGUCCAUGAUAUGAUCAUAAUAGUAUAGCGGUUGCGAACCGCUCCGCAAUUCGUGGUAGUGGUGUGGAAUCAGUUAGCGC	NC_016411.2:2327884:2327973:-	90(nt)	-30.30(kcal/mol)
xxx-m0030-5p	CGAGCUCUGGGCUUUACCGCAU	xxx-m0030	UUAAAGAGAGCGAGCUCUGGGCUUUACCGCAUGAGAAUUCUAUUUUCCCAGCUCUAAGGUUGAGCUACUUUCAUUUAU	NC_016411.2:17983294:17983371:-	78(nt)	-20.90(kcal/mol)
xxx-m0031-3p	UUACUACUUAGAUGCUUUCAGCA	xxx-m0031	ACCGGAGUCUCUGGGGAAGUCGGAAUAGGAGAGCACUCAUCUUGGGGUGGGCUUACUACUUAGAUGCUUUCAGCAGUUAUCCGCU	NC_016411.2:34660322:34660406:-	85(nt)	-23.20(kcal/mol)
xxx-m0033-5p	UCUAAUCUCUGUUCCCAAUUAC	xxx-m0033	CCUUGAAUUCUCUAAUCUCUGUUCCCAAUUACACUUAAUCCAUGAAAAGAUCAAGUGAGUUUGGGAUCAGAAAUUAGAGAUAUCAAUA	NC_016411.2:42295745:42295832:-	88(nt)	-33.90(kcal/mol)
xxx-m0034-3p	GCCAUCUGCUGACGUGUCCUGA	xxx-m0034	GGGCAUUAUGGACAUUUCACGCGUGGUCAGUUUCUUUAAGGGCAAAAAUGUCAUUGCAAUUGCCAUCUGCUGACGUGUCCUGACAAAAAGCCA	NC_016412.2:17784225:17784317:+	93(nt)	-24.00(kcal/mol)
xxx-m0036-5p	CAUCUGCUGCCACACCAUAUGCU	xxx-m0036	UCAUCGACUGCAUCUGCUGCCACACCAUAUGCUAACAUUCGCAUUGCUGUGGUACAUUUUGCUAACGGUAA	NC_016412.2:24931986:24932056:-	71(nt)	-20.20(kcal/mol)
xxx-m0037-3p	UAUGCUCCUUGGUUUAAAGAUUA	xxx-m0037	GACACACACAUUUCUUUUACCAUCAGGCGAGUGUAUGAUAACAUUGUAAGACGUUCAUAUGCUCCUUGGUUUAAAGAUUAACGGUGAACC	NC_016412.2:32633043:32633132:-	90(nt)	-21.60(kcal/mol)
xxx-m0038-3p	UGGACGUGGACGUGGUCGUGGGC	xxx-m0038	UUCUGUCCCCAAAGAGCAAGUUCCAAACGCUCCACCAAGGAGACGUGGACGUGGACGUGGUCGUGGGCGUGGUCGGAG	NC_016412.2:32689696:32689773:-	78(nt)	-24.30(kcal/mol)
xxx-m0040-3p	CAAAGUCUGACCUGACCUGACCU	xxx-m0040	CGGCAUAUGAUAGGCCAUAGGCAGGCUCAGGCUUGUGAUUUAUUUCGUAGACCAUACUCAGGCCUAUCAAAGUCUGACCUGACCUGACCUAUUCCCACCC	NC_016413.2:27595658:27595757:+	100(nt)	-30.40(kcal/mol)
xxx-m0041-5p	ACAAUGUGGUGGAACAUGGCUU	xxx-m0041	AGUGGGGGCAACAAUGUGGUGGAACAUGGCUUAGGAUUUGCCAGGUUGGGUUAGUGGCUGCACCAUGCUGGCCUGCCCACUC	NC_016413.2:37147500:37147581:+	82(nt)	-26.30(kcal/mol)
xxx-m0042-5p	GUUGACCGCUCAUACGACCCCUG	xxx-m0042	CAUGGUCAUUGUUGACCGCUCAUACGACCCCUGCAAUUGCAUUGCAGCUUAUGCGAGUGUCGUAUAACGGUCAAUAGAGACCCUUGA	NC_016413.2:38257620:38257706:+	87(nt)	-35.40(kcal/mol)
xxx-m0043-5p	GCAUUUGGGUCAAUGGACCUGU	xxx-m0043	UCACGCCGUUGCAUUUGGGUCAAUGGACCUGUGAUCAUAGGUGCAGGUCCAUCUGGUCUUGCAACGGCAGCA	NC_016413.2:39838972:39839043:+	72(nt)	-35.90(kcal/mol)
xxx-m0044-3p	UAUUGACUGCAUGCACUGGGAGU	xxx-m0044	AAAGAAUACCACAUGUUAGUGAAAUGUGGGGGUUCUCAGGGAUGAUCGAGAGUAUUGACUGCAUGCACUGGGAGUGGAAAAAUUG	NC_016413.2:40301398:40301482:+	85(nt)	-20.90(kcal/mol)
xxx-m0045-5p	UGUCUGGUCUCUCUGAUAGUGA	xxx-m0045	GCUCACUCUUUGUCUGGUCUCUCUGAUAGUGACUGUUGGUUGUUGUUCAAACAACAUGCAUUUAGACAUUACAGAGAAGAGCAUACAAAGCUUGUGGAA	NC_016413.2:26707900:26707998:-	99(nt)	-34.20(kcal/mol)
xxx-m0046-5p	CAUUUGGAGAGACAUAGACAAA	xxx-m0046	UGGAAACUUUCAUUUGGAGAGACAUAGACAAAUGAAAUUAAAUGAUAAUUUAUUUCAAUGUCUAUCUCUCUCUAAAUGGAAGUGUCCAU	NC_016413.2:43956458:43956546:-	89(nt)	-42.80(kcal/mol)
xxx-m0047-5p	AUUUCCCACAGACGGCGCCA	xxx-m0047	GAGAGCUUGUAUUUCCCACAGACGGCGCCACUGAUCGUACCUGACCAGAAGGUGGCUGUCGGCGCUGGGUUAAAUGCAGUGGUUCAC	NC_016414.2:15612680:15612766:+	87(nt)	-30.90(kcal/mol)
xxx-m0048-3p	AUCCCUAACUAGUAGUUAUC	xxx-m0048	UAGCGCAGCUUGGUAGCGCGUUUGUUUUGGGUACAAAAUGUCACAGGUUCAAAUCCUGUCAUCCCUAUCCCUAACUAGUAGUUAUCGUAUCAGCAG	NC_016414.2:17652459:17652554:+	96(nt)	-20.30(kcal/mol)
xxx-m0050-3p	GUUCUAUUUGGCUGCUUGUGCGC	xxx-m0050	GUGUCUACGUGUGUUUUCGGUUGCGGUCAUCUGAAACGAUUCAACAUCUCUUUUUAUUGUGUCCUACUUUUGGUUCUAUUUGGCUGCUUGUGCGCGAGUGGAUUA	NC_016414.2:39482859:39482963:+	105(nt)	-22.80(kcal/mol)
xxx-m0052-5p	UUUUGAGAUUGCAACUCCUGGUU	xxx-m0052	CAACGCCUCCUUUUGAGAUUGCAACUCCUGGUUCAUUUGUUGUAUCAUUGCUUGCAUCUCAAGAGGCAGCUCUC	NC_016414.2:18765778:18765851:-	74(nt)	-24.40(kcal/mol)
xxx-m0055-5p	UUGACCGCUCAUACGACCCCUGC	xxx-m0055	AUGGUCAUUGUUGACCGCUCAUACGACCCCUGCAAUUGCAUUGCAACUUAUGCGGGGGUCGUAUAACGGUCAAUAAAGACUCU	NC_016414.2:42190412:42190494:-	83(nt)	-45.10(kcal/mol)
xxx-m0056-5p	AUCUGCUCGGCCUCGGACACGA	xxx-m0056	CGGAUAGGUGAUCUGCUCGGCCUCGGACACGAAUUUCCUGACCCGCCCUUCGCGCGCGAUGUUGAGCCCGCCUGCCCCGA	NW_013655792.1:1076:1155:-	80(nt)	-26.10(kcal/mol)
xxx-m0058-5p	AUUGGUCAUCGCGCUUGGUU	xxx-m0058	GAUUCACAUAAUUGGUCAUCGCGCUUGGUUGAAAAGCCAGUAGCGUGAAAAUACCGUACGUUGGAUUA	NW_013657157.1:13213:13280:+	68(nt)	-20.60(kcal/mol)
xxx-m0059-5p	UGAGACCUCAGGUCAGGCGGG	xxx-m0059	ACGCUUGUGAUGAGACCUCAGGUCAGGCGGGGCUACCCGCUGAAUUUAAGCAUAUCAAUAAGCGG	NW_013657397.1:26183:26247:+	65(nt)	-25.30(kcal/mol)
xxx-m0060-5p	CCUACAUUGUUCCAUCGACCAG	xxx-m0060	ACUUCCCUUGCCUACAUUGUUCCAUCGACCAGAGGCUGUUCACCUUGGAGACCUGAUGCGGUUAUGAGUACGACCGGGCAUGGAAGG	NW_013657494.1:47865:47951:+	87(nt)	-25.30(kcal/mol)
xxx-m0061-5p	CACAAUUGGUCAUCGCGCUUGGU	xxx-m0061	CGUUGAUUCGCACAAUUGGUCAUCGCGCUUGGUUGAAAAGCCAGUGGCGCGAAGCUACCGUGCGUUGGAUUAUGA	NW_013657494.1:76674:76748:-	75(nt)	-26.70(kcal/mol)
xxx-m0064-5p	GGGUUGGGUCGAUCGGUCCG	xxx-m0064	GUUGGACAUUGGGUUGGGUCGAUCGGUCCGCCUAUGAGUGUGCACCGGUCGGCUUGUCCCCUUAACCGCAGCA	NW_013657497.1:18522:18594:-	73(nt)	-29.90(kcal/mol)
xxx-m0065-3p	UUGAACGGUUUGCAUAUGAUCC	xxx-m0065	UGAGUGGUAGCGUGGAUGUUUGUGUUUGCUGGCUCAAUGCUUUGGCUUUGAACGGUUUGCAUAUGAUCCUGAUCAUUUU	NW_013657497.1:19579:19657:-	79(nt)	-20.60(kcal/mol)
xxx-m0068-5p	UCUAGUAGCUGGUUCCCUCCGAAU	xxx-m0068	AAUCGAACCGUCUAGUAGCUGGUUCCCUCCGAAUUUUCCCUCAGGAUAGCUGGAGCCCGAGGGCGAGUUUUAUCGGGCAAAGCCAAUGAUUAGAGGCAUCGGGG	NW_013657528.1:41166:41269:-	104(nt)	-32.10(kcal/mol)
xxx-m0069-3p	AAAUCCGGAGGACCGAGUGCCUU	xxx-m0069	UCCAGUGGCUGGAAGAGCACCGCACGUCACGUGGAGUCCGGUGCGCCCCUGGCGGCCCUUUAAAAUCCGGAGGACCGAGUGCCUUCCUUGCCCGG	NW_013657528.1:88842:88936:-	95(nt)	-35.40(kcal/mol)
xxx-m0070-3p	GGAAGCCGGCGACCGAAGCCCC	xxx-m0070	UGCCCAGUGCCGGAAGGUUAAGGAAGUUGGUGACCUGAUGACAGGGAAGCCGGCGACCGAAGCCCCGGUGAACGGC	NW_013657547.1:183025:183100:-	76(nt)	-34.30(kcal/mol)
xxx-m0070-5p	AAGGUUAAGGAAGUUGGUGACCU	xxx-m0070	UGCCCAGUGCCGGAAGGUUAAGGAAGUUGGUGACCUGAUGACAGGGAAGCCGGCGACCGAAGCCCCGGUGAACGGC	NW_013657547.1:183025:183100:-	76(nt)	-34.30(kcal/mol)
xxx-m0004-3p	GCGGCACGCCUAGUUCUAGA	xxx-m0004	CUUUGACACGCCUAGCUCUAGAGGUGUCAUAGAAGUGUCGGACAUCAACGCAUGUCGGACACGGCGGCACGCCUAGUUCUAGAGGUGUACGUA	NC_016407.2:22562343:22562435:+	93(nt)	-37.20(kcal/mol)
xxx-m0006-5p	GGGGUAGGGUAGGGUAGGGUAC	xxx-m0006	GUCCUCGUGUGGGGUAGGGUAGGGUAGGGUACUUCCAGAUACCCGUCGUACCAAGAACCAAAGAGCACA	NC_016407.2:26992234:26992302:-	69(nt)	-22.20(kcal/mol)
xxx-m0010-5p	GCUUUCGGUUGCUGUCCGUCC	xxx-m0010	CAACAACGGAGCUUUCGGUUGCUGUCCGUCCUCUGUCCUCGCAGCUCAACGUCAAUGGCAGCUCAAAUCCCUCCGUCAACC	NC_016407.2:37807782:37807862:-	81(nt)	-22.80(kcal/mol)
xxx-m0011-3p	UUCGAAUCCCCUGCCGAUGUGAGG	xxx-m0011	CAACGUCGGUUGUCUAGUUGGUAAGGAUUCAACUCAGCUCCCACAAGGACCUGAGUUCGAAUCCCCUGCCGAUGUGAGGACCAAAUACC	NC_016407.2:43369744:43369832:-	89(nt)	-39.40(kcal/mol)
xxx-m0012-3p	CUCUAUUUUGAGCGUCAGGU	xxx-m0012	GGGUGCCGCUCAGUUUAUGCUUUGGAGGAUUAUUGUUGUGUUCCUCUAUUUUGAGCGUCAGGUAUGUCUCGCC	NC_016408.2:6822178:6822250:+	73(nt)	-20.80(kcal/mol)
xxx-m0014-3p	GGGGAUGUAGCUGAAUUUCGUC	xxx-m0014	GCAAGAGUGUGGCGUUUCUCUAAUAUCUUCCUCUUUGAUUCAGUUAACGAAGGGGAUGUAGCUGAAUUUCGUCUCACAGACAU	NC_016408.2:4907664:4907746:-	83(nt)	-20.50(kcal/mol)
xxx-m0018-5p	AAGGACCUUGCGCUAUUUGA	xxx-m0018	UGACAGUUUCAAGGACCUUGCGCUAUUUGAUAGUGUGAUAGUUUCAAGAGCCAAGGUCCUAAUGGAGUCAA	NC_016409.2:7907616:7907686:+	71(nt)	-25.70(kcal/mol)
xxx-m0019-5p	GGCCUGGUGGUAUUGACGUA	xxx-m0019	UAUUUGGGUUGGCCUGGUGGUAUUGACGUAGAAUCCUCGAGGUCUCAGGUUCAAUUUUCUCUACUGUCAAUUUAGGUGGGCUAAUUUAGCUU	NC_016409.2:13448343:13448434:+	92(nt)	-26.10(kcal/mol)
xxx-m0020-5p	CCAUUAAAGUGGUACGUGAGCUG	xxx-m0020	GACCGUUCGUCCAUUAAAGUGGUACGUGAGCUGGAUUCAGAACGUCGUGAGGCAGUUCGGUCCAUAUCCGCUGUGGGCGUGUAAGUUA	NC_016409.2:39891363:39891450:+	88(nt)	-25.50(kcal/mol)
xxx-m0021-5p	UUUGGGUCAUUUAAUCGGUUGG	xxx-m0021	ACUUAAUGCUUUUGGGUCAUUUAAUCGGUUGGGAAAUCGUCGAUUAAACGAUCCAAUCGACUUUGUGAUUAUUUAAAUGUUUGAGA	NC_016409.2:49434461:49434546:+	86(nt)	-20.80(kcal/mol)
xxx-m0023-3p	AAAAGUAGGGCGGGGCAAGG	xxx-m0023	GCCGCUUCUAGUUGGCUCGUCCUGCUUGACUGUUGAAAAAGUAGGGCGGGGCAAGGAUGGGACGGG	NC_016409.2:4512940:4513005:-	66(nt)	-29.80(kcal/mol)
xxx-m0025-3p	AGAUUUGUGAUAGCCUGCUCU	xxx-m0025	GGCCUCAAUGAAGUGAGAAGGCUGCGCAGAUCCUCUCCCCUGUUCUCUUGCCUGAGAAGGUCAGUAAGAUUUGUGAUAGCCUGCUCUUUCAUACGCA	NC_016409.2:50538978:50539074:-	97(nt)	-34.70(kcal/mol)
xxx-m0026-3p	UUAUUGUGACCCAAAAACCUA	xxx-m0026	AGCCCAGGUUUAACGAUGGAAUAUGAGGUAGUUGGGGAGGAUAGAUAAGACUGCUAGUUGCUCGAUCAGGACCCUAGAUUUAUUGUGACCCAAAAACCUAUUCCAGGGGC	NC_016409.2:50568170:50568279:-	110(nt)	-26.80(kcal/mol)
xxx-m0029-5p	GUGAAAGAUGUACGUGUAUCU	xxx-m0029	AGGCUGUGAAGUGAAAGAUGUACGUGUAUCUUCGCCUCUGAAACUUAAGAAUACGUCGUGUUUGAUUCCACUGUCUG	NC_016410.2:4137434:4137510:+	77(nt)	-20.40(kcal/mol)
xxx-m0032-3p	UAAUAUGUGUGACUGAGGUGC	xxx-m0032	CAUGUCACAGUGUCUCUCAGUCACACAUACUAAUUACAGCGCAAGAAUCUCAAUUGUAACUAAUAUGUGUGACUGAGGUGCAUUGAGACAU	NC_016410.2:46465160:46465250:+	91(nt)	-39.20(kcal/mol)
xxx-m0033-3p	CAUGGCUAGGAAGAAGGUGA	xxx-m0033	AAAAGUCGAUUCCUCGUCUUUUUCCUUGCGAUUACAUUGCAAAGCCAUGGCUAGGAAGAAGGUGAAACUCGCUUU	NC_016410.2:9598831:9598905:-	75(nt)	-20.40(kcal/mol)
xxx-m0037-5p	GUGGUGAUGGAGAUGAGGAG	xxx-m0037	AAGGCUUCCGGUGGUGAUGGAGAUGAGGAGGAUGAAGAUUAAAUAAUUAACUUACAAAUUCUCUUGAUUUUGGUCAUCCUGGUCGCGUG	NC_016410.2:44927035:44927123:-	89(nt)	-31.90(kcal/mol)
xxx-m0038-5p	GUUGACCGCUCAUACGACCCCUG	xxx-m0038	CAUGGUCAUUGUUGACCGCUCAUACGACCCCUGCAAUUGCAUUGCAGCUUUUGCGGGGGUCGUAUAACGGUCAACAGAGACCCUUGA	NC_016411.2:1711404:1711490:+	87(nt)	-54.00(kcal/mol)
xxx-m0039-3p	UAUGGACGUCGGGGAACAAAAUUU	xxx-m0039	AUGAAGCCUAUAAUUGUGUUCCCCUCGCUAUCCACUACUGCAAAUCUAAUGCUGUAUAUGGACGUCGGGGAACAAAAUUUCAAUUUUUUU	NC_016411.2:30307514:30307603:+	90(nt)	-22.50(kcal/mol)
xxx-m0042-3p	UUGUGGACAGUGUAUGGUGGGG	xxx-m0042	CAAAUAUUUACCAUGGCUGUAACACUGAAACACUGACCAAUUUUGGAUUUGUGGACAGUGUAUGGUGGGGUGAGGGCAAU	NC_016411.2:36814533:36814612:+	80(nt)	-23.20(kcal/mol)
xxx-m0044-5p	CAUCCGAAGCUGCAGCUGCAUU	xxx-m0044	UUGGUCGCGGCAUCCGAAGCUGCAGCUGCAUUGGUAGUGGCAUCCGUAGUAGCAGAAGGUGCAGCUGCAUUGGUCGCGGCAUCCGAA	NC_016411.2:32014758:32014844:-	87(nt)	-37.60(kcal/mol)
xxx-m0046-3p	UCACUGCUCUGUGAAACCAGCC	xxx-m0046	GGCCUAUGGGCUGAGAAUACAGCAGCCUGUAAUCCCUCCACUGUCAAGAGAAGGAAGUGAUCACUGCUCUGUGAAACCAGCCUCAUGCGGAU	NC_016411.2:38750208:38750299:-	92(nt)	-28.00(kcal/mol)
xxx-m0047-5p	UGCUUAGCGGGUUGGGCUGU	xxx-m0047	AUGGCUGGUUUGCUUAGCGGGUUGGGCUGUAGGGUACACUAUGCUGGCCUGCCCACUCCAAGUUGAGAGUUGGGCCAUG	NC_016411.2:38865926:38866004:-	79(nt)	-29.60(kcal/mol)
xxx-m0048-5p	UCUAAUCUCUGUUCCCAAUUAC	xxx-m0048	CCUUGAAUUCUCUAAUCUCUGUUCCCAAUUACACUUAAUCCAUGAAAAGAUCAAGUGAGUUUGGGAUCAGAAAUUAGAGAUAUCAAUA	NC_016411.2:42295745:42295832:-	88(nt)	-33.90(kcal/mol)
xxx-m0050-5p	UCUGACGAGGUUGAGGACCA	xxx-m0050	CCAGCAAGCAUCUGACGAGGUUGAGGACCAUCGGGAUGACCCUUCUGCAUCACCAUCUUAGUAUUCACCACCUUAACAGUUAGAGUGUGGGCAUU	NC_016412.2:20603621:20603715:+	95(nt)	-22.30(kcal/mol)
xxx-m0053-5p	AACGGAGCAGUGUGAGAUUU	xxx-m0053	UCUGCCAUUAAACGGAGCAGUGUGAGAUUUUCAAUCCGCCAUCAGUAGUUGAUCCACCACGCUCUGCCCUUUUUGGCGGU	NC_016413.2:9256177:9256256:+	80(nt)	-23.50(kcal/mol)
xxx-m0055-5p	GCAUUUGGGUCAAUGGACCUGU	xxx-m0055	UCACGCCGUUGCAUUUGGGUCAAUGGACCUGUGAUCAUAGGUGCAGGUCCAUCUGGUCUUGCAACGGCAGCA	NC_016413.2:39838972:39839043:+	72(nt)	-35.90(kcal/mol)
xxx-m0061-5p	UGGCUGCUGACUGGUCGUCUUCA	xxx-m0061	GCUGGUGAUGUGGCUGCUGACUGGUCGUCUUCAACCUCUAGACUUCCGGCGGUGGUUAGUGGCGGCGGGUGGUGGUCCGGCG	NC_016414.2:86795:86876:-	82(nt)	-29.20(kcal/mol)
xxx-m0062-5p	ACAUGAGAUGGGUUAGACCC	xxx-m0062	GAACAAGUGGACAUGAGAUGGGUUAGACCCAAACCCGAUCCUAACUUAGACCAAAUCAAUUAUGGGUCAUGAUAACUUGUGUUAUAAAAACACAUGUUA	NC_016414.2:14441574:14441672:-	99(nt)	-20.70(kcal/mol)
xxx-m0064-3p	AGAAAGGCAUCAGCGGGCAC	xxx-m0064	AACGAAGCAUGUGCAUGGGUGAAUCUGGAUUUUGCACCGAUGCAGAAAGGCAUCAGCGGGCACAUUCUUUGUG	NC_016414.2:45388708:45388780:-	73(nt)	-25.20(kcal/mol)
xxx-m0067-3p	GAUAUGGGGACGGAGAAGGU	xxx-m0067	GAAUGAGAUUCAAUUUCUCAUCUCCGUUGAAUAUGGGUAGCGUAACGGGUAAAUAAAUAAGUGUAGGAUAUGGGGACGGAGAAGGUGAAACUCGUU	NW_013656228.1:696:791:-	96(nt)	-23.70(kcal/mol)
xxx-m0068-3p	UUUUAGCUGCAGUGUUGCGUG	xxx-m0068	UAGCUGUUAGUCAUUGUUGCUGCUGCAGUAGGUGUGUGUAUUGCUGCUUGCAUUUUUAGCUGCAGUGUUGCGUGGAAGAAGUCU	NW_013656775.1:4538:4621:+	84(nt)	-22.20(kcal/mol)
xxx-m0070-3p	GCCUGACGAGCCAUAUCGACA	xxx-m0070	GAGCCUGCGCAUGAGCGAUCUCGGCUAUCAGAGCAACGCGCAGGCCGGCAUUGCGUCCUGCUACAACAGCCUGACGAGCCAUAUCGACAGCCUGCGGCU	NW_013657062.1:9446:9544:-	99(nt)	-33.50(kcal/mol)
xxx-m0071-5p	UGUGGACUUCCGAAUUAUAG	xxx-m0071	UAGGGAUAGAUGUGGACUUCCGAAUUAUAGAUGCUCUUGAUUUGUUUUUGGAGGUCUAUUGUUUCUGU	NW_013657186.1:5475:5542:-	68(nt)	-23.70(kcal/mol)
xxx-m0072-3p	UAUUGAGGGGUUUUCGAAGU	xxx-m0072	CGAAGUCGGUGACUGAAAUCAGAAGCUUCUUGGGUUUGGCUGGUUACUACCGCAGGUUUAUUGAGGGGUUUUCGAAGUUGGCACUUCC	NW_013657201.1:10300:10387:+	88(nt)	-23.20(kcal/mol)
xxx-m0073-5p	ACGUUUGUUGCUGACUGCUGUA	xxx-m0073	AUGCUCCUUCACGUUUGUUGCUGACUGCUGUAAAUCUGGAGGCCUACUCGAAGGCGCAAAGGAAAUAGUUGGUCAUAGCAAGAUUGGAUCUA	NW_013657209.1:6734:6825:-	92(nt)	-22.50(kcal/mol)
xxx-m0074-3p	UGAUGUCUCUGACCGCAAGCGGA	xxx-m0074	AAAAAGCUAGAAUCCGUUAAUCGAUCGAGAGAUUGCAGCUGUUACGCUUGGUUGAUGUCUCUGACCGCAAGCGGAAUAGCCCUAU	NW_013657251.1:15518:15602:-	85(nt)	-25.60(kcal/mol)
xxx-m0075-3p	UUUCUGGUCUGCUUCAGGAU	xxx-m0075	ACUCAGACAUCGUUGGAGGAGUUGGAGAUACCCACGGUCGAUGAUGUUUCUGGUCUGCUUCAGGAUGAUGUGGAGC	NW_013657311.1:594:669:-	76(nt)	-22.20(kcal/mol)
xxx-m0076-3p	GUGUGGGCUUAUGUGUGUUU	xxx-m0076	AUUUGACAUUUGUAUGCAUGUUUACUCAGGUUUCUGUGUGGGCUUAUGUGUGUUUGAUGUCAAAC	NW_013657444.1:34294:34358:+	65(nt)	-20.80(kcal/mol)
xxx-m0079-3p	UCCACGGCCAGCUUCUUAGAGG	xxx-m0079	GACCUCAGCCUGCUAAAUAGCUAUGUGGAGGUAACCCUCCACGGCCAGCUUCUUAGAGGGACUAUGGCC	NW_013657494.1:71765:71833:+	69(nt)	-27.90(kcal/mol)
xxx-m0081-3p	AGGAGUGGAGCCUGCGGCUU	xxx-m0081	CGGGGGGAGUAUGGUCGCAAGGCUGAAACUUAAAGGAAUUGACGGAAAGGCACCACCAGGAGUGGAGCCUGCGGCUUAAUUUGACUC	NW_013657494.1:32444:32530:-	87(nt)	-24.70(kcal/mol)
xxx-m0082-3p	AGGAGUGGAGCCUGCGGCUU	xxx-m0082	CGGGGGGAGUAUGGUCGCAAGGCUGAAACUUAAAGGAAUUGACGGAAGGGCACCACCAGGAGUGGAGCCUGCGGCUUAAUUUGACUC	NW_013657494.1:51006:51092:-	87(nt)	-24.70(kcal/mol)
xxx-m0083-3p	GAGUGGAGCCUGCGGCUUAA	xxx-m0083	CCGGGGGGAGUAUGGUCGCAAGGCUGAAACUUAAAGGAAUUGACGGAAGGGCACCACCAGGAGUGGAGCCUGCGGCUUAAUUUGACUCAA	NW_013657494.1:66627:66716:-	90(nt)	-25.90(kcal/mol)
xxx-m0084-3p	AAAUCAUGUGCAGCUCUAUUGA	xxx-m0084	UGAGACCUUGGUAGGGUGUGCCAUGAUAGAUGGUGGAUGUGCGACCCACGAGACCAAAUCAUGUGCAGCUCUAUUGAAUGUGGACUC	NW_013657494.1:78810:78896:-	87(nt)	-27.20(kcal/mol)
xxx-m0086-3p	ACACUGAUGUAUUCAACGAGUC	xxx-m0086	UGAGGCAAUAACAGGUCUGUGAUGCCCUUAGAUGUUCUGGGCCGCACGCGCGCUACACUGAUGUAUUCAACGAGUCUAUAGCCUUG	NW_013657497.1:6051:6136:-	86(nt)	-20.50(kcal/mol)
xxx-m0088-3p	UUGAACGGUUUGCAUAUGAUCC	xxx-m0088	UGAGUGGUAGCGUGGAUGUUUGUGUUUGCUGGCUCAAUGCUUUGGCUUUGAACGGUUUGCAUAUGAUCCUGAUCAUUUU	NW_013657497.1:70643:70721:-	79(nt)	-20.60(kcal/mol)
xxx-m0090-3p	AGGAGUGGAGCCUGCGGCUU	xxx-m0090	CGGGGGGAGUAUGGUCGCAAGGCUGAAACUUAAAGGAAUUGACGGAAGGGCACCACCAGGAGUGGAGCCUGCGGCUUAAUUUGACUC	NW_013657528.1:46175:46261:-	87(nt)	-24.70(kcal/mol)
xxx-m0001-5p	AUUAGGUGCAGCGCAGUGUG	xxx-m0001	CGGGGUUUGAAUUAGGUGCAGCGCAGUGUGACUGCACACUCGUGCAUCUCGAUCGUUUGAUCUUGG	NC_016407.2:7362322:7362387:+	66(nt)	-24.10(kcal/mol)
xxx-m0002-5p	UUUCACAGUUGGUAAGUUCUG	xxx-m0002	UUGCACUAACUUUCACAGUUGGUAAGUUCUGAGACAAAUCUAGUUCUUCCAAUUUGGAGAGGUUAGUGAAA	NC_016407.2:11544173:11544243:+	71(nt)	-23.30(kcal/mol)
xxx-m0001-5p	AUUAGGUGCAGCGCAGUGUG	xxx-m0001	CGGGGUUUGAAUUAGGUGCAGCGCAGUGUGACUGCACACUCGUGCAUCUCGAUCGUUUGAUCUUGG	NC_016407.2:7362322:7362387:+	66(nt)	-24.10(kcal/mol)
xxx-m0004-5p	UUUGGGUCAUUUAAUCGGUUGG	xxx-m0004	ACUUAAUGCAUUUGGGUCAUUUAAUCGGUUGGGAAAUCGUCGAUUAAACGAUCCAAUCGACUUUGUGAUUAUAUAAAUGUUUGGGA	NC_016407.2:36084122:36084207:+	86(nt)	-24.00(kcal/mol)
xxx-m0009-5p	GCUUUCGGUUGCUGUCCGUCC	xxx-m0009	CAACAACGGAGCUUUCGGUUGCUGUCCGUCCUCUGUCCUCGCAGCUCAACGUCAAUGGCAGCUCAAAUCCCUCCGUCAACC	NC_016407.2:37807782:37807862:-	81(nt)	-22.80(kcal/mol)
xxx-m0010-5p	AACUUUUACCCAUGGAUCUCAU	xxx-m0010	AUGUUAGUGUAACUUUUACCCAUGGAUCUCAUCAAAUCUCUCACCGUAUCUGAUUGAGUUUAUGUGUAAAAAUGUUACACAGUCAA	NC_016407.2:41546497:41546582:-	86(nt)	-21.00(kcal/mol)
xxx-m0011-5p	GUAAUUUUGGUGAAAUCACC	xxx-m0011	GCGGUUCACCGUAAUUUUGGUGAAAUCACCUUGGUACCAAACAUACACUCUAAAAUGUAGCUUUUAUCAAAAUUAUGGUGACUCACU	NC_016408.2:6773750:6773836:+	87(nt)	-24.10(kcal/mol)
xxx-m0012-3p	GGGGAUGUAGCUGAAUUUCGUC	xxx-m0012	GCAAGAGUGUGGCGUUUCUCUAAUAUCUUCCUCUUUGAUUCAGUUAACGAAGGGGAUGUAGCUGAAUUUCGUCUCACAGACAU	NC_016408.2:4907664:4907746:-	83(nt)	-20.50(kcal/mol)
xxx-m0014-3p	UUAAAGGACUCGUUGUCUGUAU	xxx-m0014	UAAUCAGUAAAGUAUAUUAUAUAGAUAAUGAAUACUGAUAAUGAGCUAAGUAACACAUUUAACUCCACAAUUAAAGGACUCGUUGUCUGUAUAAGCUGAAAG	NC_016408.2:30603084:30603185:-	102(nt)	-22.80(kcal/mol)
xxx-m0017-5p	UAAUACUAGGUGCGUAGAUU	xxx-m0017	UUAAGAUUUUUAAUACUAGGUGCGUAGAUUAAUCAAACCUGUGUAUUUCACAGGUGCAAUGUACCUGACCUAUAUGAAGAGUGAAU	NC_016409.2:33804180:33804265:+	86(nt)	-20.60(kcal/mol)
xxx-m0018-5p	CCAUUAAAGUGGUACGUGAGCUG	xxx-m0018	GACCGUUCGUCCAUUAAAGUGGUACGUGAGCUGGAUUCAGAACGUCGUGAGGCAGUUCGGUCCAUAUCCGCUGUGGGCGUGUAAGUUA	NC_016409.2:39891363:39891450:+	88(nt)	-25.50(kcal/mol)
xxx-m0021-5p	UGCCUGUACCGAGCGUGAUUU	xxx-m0021	AGUUAACUGCUGCCUGUACCGAGCGUGAUUUAACUGCCGUUGGGGUUUAGCGCAAGUUAACUCACACUGGGUACCAAGCGGUAGUUAACUU	NC_016409.2:30539934:30540024:-	91(nt)	-44.10(kcal/mol)
xxx-m0022-3p	UUAUUGUGACCCAAAAACCUA	xxx-m0022	AGCCCAGGUUUAACGAUGGAAUAUGAGGUAGUUGGGGAGGAUAGAUAAGACUGCUAGUUGCUCGAUCAGGACCCUAGAUUUAUUGUGACCCAAAAACCUAUUCCAGGGGC	NC_016409.2:50568170:50568279:-	110(nt)	-26.80(kcal/mol)
xxx-m0024-5p	GUGGAAUGUGGAGCGUAGUCUU	xxx-m0024	UUAAAAUAGAGUGGAAUGUGGAGCGUAGUCUUUGAUUAGAUGAAUGAUUAACAAGGAUUGCAUCUACCUGACUCUUUCUGAC	NC_016410.2:1142333:1142414:+	82(nt)	-21.40(kcal/mol)
xxx-m0026-3p	GUCGGUAUCACUGGUGUCAAU	xxx-m0026	CUCUUGGGUUCAAUGGAGAAAGUACAAUACCUAAAUUAUUAAGUCUUGUGACAUGGUCGGUAUCACUGGUGUCAAUGAUCCAAGGA	NC_016410.2:23429019:23429104:+	86(nt)	-20.70(kcal/mol)
xxx-m0028-3p	UAAUAUGUGUGACUGAGGUGC	xxx-m0028	CAUGUCACAGUGUCUCUCAGUCACACAUACUAAUUACAGCGCAAGAAUCUCAAUUGUAACUAAUAUGUGUGACUGAGGUGCAUUGAGACAU	NC_016410.2:46465160:46465250:+	91(nt)	-39.20(kcal/mol)
xxx-m0029-5p	CGUGCGUGCGCGUGUGUGUGUG	xxx-m0029	UGCGUGCGUGCGUGCGUGCGCGUGUGUGUGUGUGUAUAUAUAUAUAUACACACACACACGGGCGCGGGCGGGGGUGGGUG	NC_016410.2:716272:716351:-	80(nt)	-54.10(kcal/mol)
xxx-m0031-5p	UUGCCCAUCUUUCGGACGUACUU	xxx-m0031	GUCUUUGUAAUUGCCCAUCUUUCGGACGUACUUGAUGAUGUGGUUCUGGGGACAAGUCAGCCCGUUGUAUCGGUCGAAAUCUGGGAUUUUGAACUUCUUAGGGACA	NC_016410.2:14664224:14664329:-	106(nt)	-23.90(kcal/mol)
xxx-m0033-5p	GUGGUGAUGGAGAUGAGGAG	xxx-m0033	AAGGCUUCCGGUGGUGAUGGAGAUGAGGAGGAUGAAGAUUAAAUAAUUAACUUACAAAUUCUCUUGAUUUUGGUCAUCCUGGUCGCGUG	NC_016410.2:44927035:44927123:-	89(nt)	-31.90(kcal/mol)
xxx-m0035-5p	GUAGGUAGCUGCCACGUCAC	xxx-m0035	AUUUUCCGUCGUAGGUAGCUGCCACGUCACACGGUGGGACUGACAUGGCAGAAGCUCGCGUCAACUCAUGGAACCG	NC_016410.2:56042000:56042075:-	76(nt)	-25.00(kcal/mol)
xxx-m0040-5p	GUUGACCGCUCAUACGACCCCUG	xxx-m0040	CAUGGUCAUUGUUGACCGCUCAUACGACCCCUGCAAUUGCAUUGCAGCUUAUGCGGGGGUCGUAUAACGGUCAACAAAGACCCUUGA	NC_016411.2:24856100:24856186:+	87(nt)	-50.80(kcal/mol)
xxx-m0041-3p	GGCGGGCUUGUGGGCUUAGGUG	xxx-m0041	AGUGUGGGCCUUCCGUGGGCUAUAAUCCAGAAGCCAUGGGCUCGAGAGAUGCUGUGCUUGGCGGGCUUGUGGGCUUAGGUGGGCCUUUUAG	NC_016411.2:33327745:33327835:+	91(nt)	-33.40(kcal/mol)
xxx-m0042-3p	UGAUGUCUCUGACCGCAAGCGGA	xxx-m0042	UAAAAGCUAGAAUCCGUUAAUCGAUCGAGAGAUUGCAGCUGUUACGCUUGGUUGAUGUCUCUGACCGCAAGCGGAAUAGCCCUAU	NC_016411.2:16904153:16904237:-	85(nt)	-25.60(kcal/mol)
xxx-m0044-3p	AAGGGCAAGAGGAAGAGAGGG	xxx-m0044	AACCACUUUCCUUUUUCUUUUUUUUCCCUCUCUCUCCCAACAGAAGAAGAAGAAACUCAUAAGAGAGAAGGGCAAGAGGAAGAGAGGGAAAACCGGCC	NC_016411.2:30858742:30858839:-	98(nt)	-29.70(kcal/mol)
xxx-m0045-5p	CAUCCGAAGCUGCAGCUGCAUU	xxx-m0045	UUGGUCGCGGCAUCCGAAGCUGCAGCUGCAUUGGUAGUGGCAUCCGUAGUAGCAGAAGGUGCAGCUGCAUUGGUCGCGGCAUCCGAA	NC_016411.2:32014758:32014844:-	87(nt)	-37.60(kcal/mol)
xxx-m0046-5p	UCUAAUCUCUGUUCCCAAUUAC	xxx-m0046	CCUUGAAUUCUCUAAUCUCUGUUCCCAAUUACACUUAAUCCAUGAAAAGAUCAAGUGAGUUUGGGAUCAGAAAUUAGAGAUAUCAAUA	NC_016411.2:42295745:42295832:-	88(nt)	-33.90(kcal/mol)
xxx-m0047-5p	UCUGACGAGGUUGAGGACCA	xxx-m0047	CCAGCAAGCAUCUGACGAGGUUGAGGACCAUCGGGAUGACCCUUCUGCAUCACCAUCUUAGUAUUCACCACCUUAACAGUUAGAGUGUGGGCAUU	NC_016412.2:20603621:20603715:+	95(nt)	-22.30(kcal/mol)
xxx-m0053-5p	CUUUGGAGGACUGAAAUGGCA	xxx-m0053	AAUAACUUGUCUUUGGAGGACUGAAAUGGCACCGACGCAACCAUAAACUGGAUCUUUUAUCCUUGCCUCAGCUUCAUAAGCAAGAGAGU	NC_016413.2:12360631:12360719:+	89(nt)	-20.10(kcal/mol)
xxx-m0054-5p	GUUGACCGCUCAUACGACCCCUG	xxx-m0054	CAUGGUCAUUGUUGACCGCUCAUACGACCCCUGCAAUUGCAUUGCAGCUUAUGCGAGUGUCGUAUAACGGUCAAUAGAGACCCUUGA	NC_016413.2:38257620:38257706:+	87(nt)	-35.40(kcal/mol)
xxx-m0060-3p	AGAUUGCUAGCCUUACCGGUGU	xxx-m0060	AAAAUUAGGCAUACUGGUAGUUUGUAAUUCAGUUCAUGGUAGUGAAAUCUACCCUAUUAAUUAAAGAUUGCUAGCCUUACCGGUGUAAAUGUUAGU	NC_016413.2:43832859:43832954:-	96(nt)	-20.80(kcal/mol)
xxx-m0061-5p	ACUUCUGAAACUUGAUCGUGUUG	xxx-m0061	AGGACCUUAGACUUCUGAAACUUGAUCGUGUUGACCUCACUGGAGAUUAUGGUUACCUUUCUAAAGAACUGAGGUGGGUCCA	NC_016414.2:13786891:13786972:+	82(nt)	-22.00(kcal/mol)
xxx-m0064-3p	AUUACCGAAGAUGGGGAUUUG	xxx-m0064	ACUGUUACAGGGAAUACGUAUCAAAAUGGUGGCUGCUGGUGCUGAACACAGUGUAGCAAUUACCGAAGAUGGGGAUUUGUAUGGAUGGG	NC_016414.2:39412419:39412507:+	89(nt)	-23.20(kcal/mol)
xxx-m0067-5p	ACAUGAGAUGGGUUAGACCC	xxx-m0067	GAACAAGUGGACAUGAGAUGGGUUAGACCCAAACCCGAUCCUAACUUAGACCAAAUCAAUUAUGGGUCAUGAUAACUUGUGUUAUAAAAACACAUGUUA	NC_016414.2:14441574:14441672:-	99(nt)	-20.70(kcal/mol)
xxx-m0069-3p	CUGGUAAUUGGGACUGAGGU	xxx-m0069	AUUGCUCACUGCCUUGCAUUGCAUGGCCAUGUUGUAAUACAUUUGAUGUGGUACUAACUGGUAAUUGGGACUGAGGUAAAGAGUUUU	NC_016414.2:36456884:36456970:-	87(nt)	-22.70(kcal/mol)
xxx-m0070-3p	AGAAAGGCAUCAGCGGGCAC	xxx-m0070	AACGAAGCAUGUGCAUGGGUGAAUCUGGAUUUUGCACCGAUGCAGAAAGGCAUCAGCGGGCACAUUCUUUGUG	NC_016414.2:45388708:45388780:-	73(nt)	-25.20(kcal/mol)
xxx-m0072-5p	UCCGGCGGCGGCCGGACUGUCG	xxx-m0072	ACGAAUCGGAUCCGGCGGCGGCCGGACUGUCGUCAAGAUAGAUGCCAAGGCUGGGCGUGUUCGUCGACACGUCGCCGCAAUGCCUGAUCUUCAUCGUA	NW_013656657.1:3961:4058:-	98(nt)	-41.30(kcal/mol)
xxx-m0074-3p	GCCUGACGAGCCAUAUCGACA	xxx-m0074	GAGCCUGCGCAUGAGCGAUCUCGGCUAUCAGAGCAACGCGCAGGCCGGCAUUGCGUCCUGCUACAACAGCCUGACGAGCCAUAUCGACAGCCUGCGGCU	NW_013657062.1:9446:9544:-	99(nt)	-33.50(kcal/mol)
xxx-m0075-5p	GUGUGGGCAACUUGCGGCGA	xxx-m0075	GCAGUUCAUUGUGUGGGCAACUUGCGGCGAGGGUCGCCAUGGUCGUCUGGUUCGCGGUGAUCGCCGGGGGCGGCACAGGGUGCGUCGCG	NW_013657205.1:7584:7672:+	89(nt)	-33.50(kcal/mol)
xxx-m0076-5p	ACGUUUGUUGCUGACUGCUGUA	xxx-m0076	AUGCUCCUUCACGUUUGUUGCUGACUGCUGUAAAUCUGGAGGCCUACUCGAAGGCGCAAAGGAAAUAGUUGGUCAUAGCAAGAUUGGAUCUA	NW_013657209.1:6734:6825:-	92(nt)	-22.50(kcal/mol)
xxx-m0077-5p	UUUGGUCAUUUAAUCGGUUGGGA	xxx-m0077	CUUAAUGCUUUUUGGUCAUUUAAUCGGUUGGGAAAUCGUCGAUUAAACGAUCCGAUCGACUUUGUGAUUAUUUAAUAGUUUGGGA	NW_013657389.1:35036:35120:-	85(nt)	-20.60(kcal/mol)
xxx-m0078-3p	GAAAUUGGCAAGGGGAUUCGAUA	xxx-m0078	CGGGAGGCCAACAUAUUCAUCCUGCAGGCAAUAUCUAUUCAAUAGGAAAUUGGCAAGGGGAUUCGAUAUGUGACACCC	NW_013657397.1:34783:34860:-	78(nt)	-20.70(kcal/mol)
xxx-m0084-3p	AACGAGACCUCAGCCUGCUA	xxx-m0084	GCAUGGCCGUUCUUAGUUGGUGGAGCGAUUUGUCUGGUUAAUUCCGUUAACGAACGAGACCUCAGCCUGCUAAAUAGCUAUG	NW_013657497.1:47751:47832:-	82(nt)	-23.50(kcal/mol)
xxx-m0084-5p	GUUGGUGGAGCGAUUUGUCUGG	xxx-m0084	GCAUGGCCGUUCUUAGUUGGUGGAGCGAUUUGUCUGGUUAAUUCCGUUAACGAACGAGACCUCAGCCUGCUAAAUAGCUAUG	NW_013657497.1:47751:47832:-	82(nt)	-23.50(kcal/mol)
xxx-m0085-3p	CCCCGGUAAACGGCGGCAGU	xxx-m0085	UGUAUAGAGUCUGACACCUGCCCGGUGCUGGAAGGUCGGAAGGAGAAGUGUUAUAAGCUUUGAAUGGAAGCCCCGGUAAACGGCGGCAGUAACUCUAACU	NW_013657516.1:7587:7686:+	100(nt)	-27.90(kcal/mol)
xxx-m0086-5p	CUUAGGGGGCGGUUUUGUAGUU	xxx-m0086	AUGUGCAAAACUUAGGGGGCGGUUUUGUAGUUUUUUUUGGCUAAACUCUACUUUUCGCCUCCUAAGUUUCAAAAUGUUGCGAUU	NW_013657524.1:19247:19330:+	84(nt)	-28.60(kcal/mol)
xxx-m0087-5p	GUAGCUGGUUCCCUCCGAAU	xxx-m0087	GAACCGUCUAGUAGCUGGUUCCCUCCGAAUUUUCCCUCAGGAUAGCUGGAGCCCGAGGGCGAGUUUUAUCGGGCAAAGCCAAUGAUUAGAGGCAUCG	NW_013657528.1:41169:41265:-	97(nt)	-29.80(kcal/mol)
xxx-m0088-3p	GAGUGGAGCCUGCGGCUUAA	xxx-m0088	CCGGGGGGAGUAUGGUCGCAAGGCUGAAACUUAAAGGAAUUGACGGAAGGGCACCACCAGGAGUGGAGCCUGCGGCUUAAUUUGACUCAA	NW_013657528.1:46173:46262:-	90(nt)	-25.90(kcal/mol)
xxx-m0001-5p	AUUAGGUGCAGCGCAGUGUG	xxx-m0001	CGGGGUUUGAAUUAGGUGCAGCGCAGUGUGACUGCACACUCGUGCAUCUCGAUCGUUUGAUCUUGG	NC_016407.2:7362322:7362387:+	66(nt)	-24.10(kcal/mol)
xxx-m0005-5p	CAAGGGUUGGGCUGUUCGCCC	xxx-m0005	UAGUAUGUUCCAAGGGUUGGGCUGUUCGCCCAUUAAAGCGGUGCGUGAGCUCGGUUCAGAACGUCGUGA	NC_016408.2:424744:424812:-	69(nt)	-20.60(kcal/mol)
xxx-m0006-5p	GGCUAGAGUUCGGUAGGAAGA	xxx-m0006	GAGUAAUCCAGGCUAGAGUUCGGUAGGAAGAUAAGUAAAUUCUGCCCAAAGAUUGUUCCAACCAAGAAUGUUCUGGCCCAGAAUAUUUC	NC_016408.2:2403218:2403306:-	89(nt)	-21.80(kcal/mol)
xxx-m0007-3p	GGGGAUGUAGCUGAAUUUCGUC	xxx-m0007	GCAAGAGUGUGGCGUUUCUCUAAUAUCUUCCUCUUUGAUUCAGUUAACGAAGGGGAUGUAGCUGAAUUUCGUCUCACAGACAU	NC_016408.2:4907664:4907746:-	83(nt)	-20.50(kcal/mol)
xxx-m0009-5p	AUAUGAGGGCGUGGGCUUGUG	xxx-m0009	CAACAUUUUGAUAUGAGGGCGUGGGCUUGUGUGUCUGAGGAUUUUGAUAUUUUGAGAGUAACCAAGUCUCUCCUUGAAUCGGUCACUUC	NC_016409.2:9849775:9849863:+	89(nt)	-21.20(kcal/mol)
xxx-m0010-5p	GUUGACCGCUCAUACGACCCCUG	xxx-m0010	CAUGGUCAUUGUUGACCGCUCAUACGACCCCUGCAAUUGCAUUGCAGCUUAUGCGGGGGUCGUAUAACGGUCAACAGAGACCCUU	NC_016409.2:21980086:21980170:+	85(nt)	-50.90(kcal/mol)
xxx-m0014-3p	AUUCGACUCUAACUGGAUGGUC	xxx-m0014	CAUCAUUUGAAAAUGGAGUGUCCAGUAGUUGAAUCAUAUCUAGCACUCGAGAUUCGACUCUAACUGGAUGGUCAGCAAUGAAC	NC_016410.2:4135706:4135788:+	83(nt)	-22.50(kcal/mol)
xxx-m0015-3p	GUCGGUAUCACUGGUGUCAAU	xxx-m0015	CUCUUGGGUUCAAUGGAGAAAGUACAAUACCUAAAUUAUUAAGUCUUGUGACAUGGUCGGUAUCACUGGUGUCAAUGAUCCAAGGA	NC_016410.2:23429019:23429104:+	86(nt)	-20.70(kcal/mol)
xxx-m0016-3p	UAAGGUUCGUUGGAUGGCGGA	xxx-m0016	UUUGGAUUUCUUCCGUCAUCAAAUGAACCUUGGAGGUCAAGGAGUCUCAACUAUUGUGGAGCUGUUCUCUAAGGUUCGUUGGAUGGCGGAAGAAUUCCAA	NC_016410.2:29723694:29723793:+	100(nt)	-54.40(kcal/mol)
xxx-m0019-5p	GUGGUGAUGGAGAUGAGGAG	xxx-m0019	AAGGCUUCCGGUGGUGAUGGAGAUGAGGAGGAUGAAGAUUAAAUAAUUAACUUACAAAUUCUCUUGAUUUUGGUCAUCCUGGUCGCGUG	NC_016410.2:44927035:44927123:-	89(nt)	-31.90(kcal/mol)
xxx-m0021-3p	GGCGGGCUUGUGGGCUUAGGU	xxx-m0021	GUGUGGGCCUUCCGUGGGCUAUAAUCCAGAAGCCAUGGGCUCGAGAGAUGCUGUGCUUGGCGGGCUUGUGGGCUUAGGUGGGCCUUUUA	NC_016411.2:33327746:33327834:+	89(nt)	-33.40(kcal/mol)
xxx-m0022-3p	UUUGUGGACAGUGUAUGGUGGGG	xxx-m0022	CAAAUAUUUACCAUGGCUGUAACACUGAAACACUGACCAAUUUUGGAUUUGUGGACAGUGUAUGGUGGGGUGAGGGCAAU	NC_016411.2:36814533:36814612:+	80(nt)	-23.20(kcal/mol)
xxx-m0025-5p	GCUUAGCGGGUUGGGCUGUAG	xxx-m0025	UGGCUGGUUUGCUUAGCGGGUUGGGCUGUAGGGUACACUAUGCUGGCCUGCCCACUCCAAGUUGAGAGUUGGGCCAU	NC_016411.2:38865927:38866003:-	77(nt)	-28.40(kcal/mol)
xxx-m0026-5p	UCUAAUCUCUGUUCCCAAUUAC	xxx-m0026	CCUUGAAUUCUCUAAUCUCUGUUCCCAAUUACACUUAAUCCAUGAAAAGAUCAAGUGAGUUUGGGAUCAGAAAUUAGAGAUAUCAAUA	NC_016411.2:42295745:42295832:-	88(nt)	-33.90(kcal/mol)
xxx-m0027-5p	AUUGCCCAUCUUUCGGACGUACU	xxx-m0027	UGUCUUUGUAAUUGCCCAUCUUUCGGACGUACUUGAUGAUGUGGUUCUGGGGACAAGUCAGCCCGUUGUAUCGGUCGAAAUCUGGGAUUUUGAACUUCUUAGGGACAU	NC_016412.2:15425219:15425326:+	108(nt)	-24.40(kcal/mol)
xxx-m0028-5p	UCUGACGAGGUUGAGGACCA	xxx-m0028	CCAGCAAGCAUCUGACGAGGUUGAGGACCAUCGGGAUGACCCUUCUGCAUCACCAUCUUAGUAUUCACCACCUUAACAGUUAGAGUGUGGGCAUU	NC_016412.2:20603621:20603715:+	95(nt)	-22.30(kcal/mol)
xxx-m0029-3p	UAAAUUUGGUGGGAUCAAUG	xxx-m0029	UCAAAAUUCAUACGAGUCUCACCAAAUCAUGUGGGGCCAUAUAAAUUUGGUGGGAUCAAUGUGAAUUUUAA	NC_016412.2:479837:479907:-	71(nt)	-26.30(kcal/mol)
xxx-m0033-5p	AUUUGGGUCAAUGGACCUGUGAU	xxx-m0033	ACGCCGUUGCAUUUGGGUCAAUGGACCUGUGAUCAUAGGUGCAGGUCCAUCUGGUCUUGCAACGGCAG	NC_016413.2:39838974:39839041:+	68(nt)	-35.90(kcal/mol)
xxx-m0036-5p	CAUUUAGUUCAGUGGACGUGUG	xxx-m0036	CACUCCGUUGCAUUUAGUUCAGUGGACGUGUGAUCAUAUGUGCAAGUCCAUCUGACCUAGCGACGACAAC	NC_016413.2:31290770:31290839:-	70(nt)	-23.60(kcal/mol)
xxx-m0037-5p	CAUUUGGAGAGACAUAGACAAA	xxx-m0037	UGGAAACUUUCAUUUGGAGAGACAUAGACAAAUGAAAUUAAAUGAUAAUUUAUUUCAAUGUCUAUCUCUCUCUAAAUGGAAGUGUCCAU	NC_016413.2:43956458:43956546:-	89(nt)	-42.80(kcal/mol)
xxx-m0039-5p	ACUUCUGAAACUUGAUCGUGUUG	xxx-m0039	AGGACCUUAGACUUCUGAAACUUGAUCGUGUUGACCUCACUGGAGAUUAUGGUUACCUUUCUAAAGAACUGAGGUGGGUCCA	NC_016414.2:13786891:13786972:+	82(nt)	-22.00(kcal/mol)
xxx-m0047-5p	UUGCUGUUGACCGUCGACGU	xxx-m0047	GCCUGAACUGUUGCUGUUGACCGUCGACGUCGCGCUCGCCGCGCCGAGCGUCACAUCGCCCUUGGCGGCGAUCGUCCCGCCCUGGCC	NW_013656574.1:2256:2342:+	87(nt)	-29.80(kcal/mol)
xxx-m0048-3p	UUUUAGCUGCAGUGUUGCGUG	xxx-m0048	UAGCUGUUAGUCAUUGUUGCUGCUGCAGUAGGUGUGUGUAUUGCUGCUUGCAUUUUUAGCUGCAGUGUUGCGUGGAAGAAGUCU	NW_013656775.1:4538:4621:+	84(nt)	-22.20(kcal/mol)
xxx-m0051-5p	UGCCAUGGAAUCGAGAGCUCCAAG	xxx-m0051	UGUUGAGCCGUGCCAUGGAAUCGAGAGCUCCAAGUGGGCCAUUUUUGGAAAGCAGAAUUGGCGAUGCGGGAUGAACCGAAAGCUGGGUUACGGUGCCCAACU	NW_013657494.1:30323:30424:-	102(nt)	-32.00(kcal/mol)
xxx-m0052-5p	GCCUGGGUUGUUGAAAUGCU	xxx-m0052	GGUGGCCGAAGCCUGGGUUGUUGAAAUGCUCGCGGAGAUGUCAUCAUCACGAUUGUGGUGUCGGCCUGU	NW_013657494.1:30849:30917:-	69(nt)	-22.60(kcal/mol)
xxx-m0053-3p	AACGAGACCUCAGCCUGCUAA	xxx-m0053	UGCAUGGCCGUUCUUAGUUGGUGGAGCGAUUUGUCUGGUUAAUUCCGUUAACGAACGAGACCUCAGCCUGCUAAAUAGCUAUGU	NW_013657494.1:69298:69381:-	84(nt)	-25.50(kcal/mol)
xxx-m0054-5p	ACAAUUGGUCAUCGCGCUUGGU	xxx-m0054	GUUGAUUCGCACAAUUGGUCAUCGCGCUUGGUUGAAAAGCCAGUGGCGCGAAGCUACCGUGCGUUGGAUUAUG	NW_013657497.1:39574:39646:+	73(nt)	-26.70(kcal/mol)
xxx-m0057-3p	GAGUGGAGCCUGCGGCUUAAUUU	xxx-m0057	GUUCCGGGGGGAGUAUGGUCGCAAGGCUGAAACUUAAAGGAAUUGACGGAAGGGCACCACCAGGAGUGGAGCCUGCGGCUUAAUUUGACUCAACAC	NW_013657497.1:25526:25621:-	96(nt)	-25.90(kcal/mol)
xxx-m0059-3p	AACGAGACCUCAGCCUGCUA	xxx-m0059	GCAUGGCCGUUCUUAGUUGGUGGAGCGAUUUGUCUGGUUAAUUCCGUUAACGAACGAGACCUCAGCCUGCUAAAUAGCUAUG	NW_013657497.1:47751:47832:-	82(nt)	-23.50(kcal/mol)
xxx-m0060-3p	GAGUGGAGCCUGCGGCUUAA	xxx-m0060	CCGGGGGGAGUAUGGUCGCAAGGCUGAAACUUAAAGGAAUUGACGGAAGGGCACCACCAGGAGUGGAGCCUGCGGCUUAAUUUGACUCAA	NW_013657497.1:47911:48000:-	90(nt)	-25.90(kcal/mol)
xxx-m0063-3p	ACGGAGGUGUGCGAAGGUAGGCUC	xxx-m0063	UGCGAGGUGGGUAGUUUAUCUGGGGCGGAUGCCUCCUAAAGAGUAACGGAGGUGUGCGAAGGUAGGCUCAAGCUAAGAU	NW_013657516.1:7984:8062:+	79(nt)	-24.90(kcal/mol)
xxx-m0004-5p	UUGCAAUGAACGGCUAGGAUG	xxx-m0004	AAGUUGUGGUUUGCAAUGAACGGCUAGGAUGCAAAGGAGUUAUCAGAUUUUACGCAUAUGGAUCGAUUCAUUGUUUUAAUGAUACGAUUC	NC_016407.2:22849330:22849419:+	90(nt)	-20.00(kcal/mol)
xxx-m0005-5p	UUUGGGUCAUUUAAUCGGUUGGG	xxx-m0005	ACUUAAUGCAUUUGGGUCAUUUAAUCGGUUGGGAAAUCGUCGAUUAAACGAUCCAAUCGACUUUGUGAUUAUAUAAAUGUUUGGGA	NC_016407.2:36084122:36084207:+	86(nt)	-24.00(kcal/mol)
xxx-m0008-3p	CUUAUUUUGGUGGGAUCAGU	xxx-m0008	GGGUGUAGGAAGGUGGUUUGAUGAUAAAUGUAGGUCAGAGGUGAGAGCCGGUGUUUCAACCUUAUUUUGGUGGGAUCAGUUGCUACACAA	NC_016408.2:15522315:15522404:+	90(nt)	-24.80(kcal/mol)
xxx-m0009-5p	CAUUAUUUUCCGGAAUGAGG	xxx-m0009	CUAGGAACCACAUUAUUUUCCGGAAUGAGGUGAAAUACGUUGACGAAUUAUUACCGGAAAUAAAUGUGAUGUCGUGGC	NC_016408.2:18233372:18233449:+	78(nt)	-21.60(kcal/mol)
xxx-m0010-3p	CUCCGCUCUGGUGUAGCGGC	xxx-m0010	UGGCCGCUUUCCACUUCUGACACACGCCGACGCGGCCUGGUGCGGUGGUAUUGAUUUUUCCGCUCCGCUCUGGUGUAGCGGCCGGCGCGGCC	NC_016408.2:29395641:29395732:+	92(nt)	-35.30(kcal/mol)
xxx-m0011-5p	CCAAGGGUUGGGCUGUUCGCCC	xxx-m0011	GUAGUAUGUUCCAAGGGUUGGGCUGUUCGCCCAUUAAAGCGGUGCGUGAGCUCGGUUCAGAACGUCGUGA	NC_016408.2:424744:424813:-	70(nt)	-20.60(kcal/mol)
xxx-m0012-3p	GGGGAUGUAGCUGAAUUUCGUC	xxx-m0012	GCAAGAGUGUGGCGUUUCUCUAAUAUCUUCCUCUUUGAUUCAGUUAACGAAGGGGAUGUAGCUGAAUUUCGUCUCACAGACAU	NC_016408.2:4907664:4907746:-	83(nt)	-20.50(kcal/mol)
xxx-m0015-5p	AUAUGAGGGCGUGGGCUUGUG	xxx-m0015	CAACAUUUUGAUAUGAGGGCGUGGGCUUGUGUGUCUGAGGAUUUUGAUAUUUUGAGAGUAACCAAGUCUCUCCUUGAAUCGGUCACUUC	NC_016409.2:9838897:9838985:+	89(nt)	-21.20(kcal/mol)
xxx-m0016-5p	GGCCUGGUGGUAUUGACGUA	xxx-m0016	UAUUUGGGUUGGCCUGGUGGUAUUGACGUAGAAUCCUCGAGGUCUCAGGUUCAAUUUUCUCUACUGUCAAUUUAGGUGGGCUAAUUUAGCUU	NC_016409.2:13448343:13448434:+	92(nt)	-26.10(kcal/mol)
xxx-m0017-5p	UGUGGAUCACUCGGCCGGGGAUC	xxx-m0017	UGAUGCAGCAUGUGGAUCACUCGGCCGGGGAUCUUCUUGAUCUCUUGCAGGGUCUACUUCGGUUUGAUCCCAUGAGCAGGA	NC_016409.2:39211693:39211773:+	81(nt)	-28.10(kcal/mol)
xxx-m0019-5p	GUUGACCGCUCAUACGACCCCUG	xxx-m0019	CAUGGUCAUUGUUGACCGCUCAUACGACCCCUGCAAUUGCAUUGCAGCUUAUGCGGGGGUCGUAUAACGGUCAACAGAGACCCUUGA	NC_016409.2:49327501:49327587:+	87(nt)	-51.10(kcal/mol)
xxx-m0020-5p	UGUGCUCCAGCCAGACUUUGAG	xxx-m0020	AGACCUUGUGUGUGCUCCAGCCAGACUUUGAGCCUCAUCCCAAAGCUGUUUGGAGGUCUCACAAUGCAG	NC_016409.2:490045:490113:-	69(nt)	-21.70(kcal/mol)
xxx-m0021-5p	CUUUAGAGUGGGUCGCUUGG	xxx-m0021	GUCAUGUUGACUUUAGAGUGGGUCGCUUGGAAGCCAAUUUUGCAAGUGAGUUUGGAAACAGAGCGGCGAGAUUUAGAGGCAGUGGAUGAUG	NC_016409.2:1026419:1026509:-	91(nt)	-25.60(kcal/mol)
xxx-m0022-3p	UAUAGUACCCAUUGCUGCCAAU	xxx-m0022	UUGAGAACAGCUGUUGGUUAAGCAAGGAGUAUGGUAACACAUUUUGUUGUAUAGUACCCAUUGCUGCCAAUCUCAACUCAG	NC_016409.2:43033313:43033393:-	81(nt)	-21.20(kcal/mol)
xxx-m0024-5p	UCUCGUGGUUGGUUGACUGA	xxx-m0024	AGCGGAAUUGUCUCGUGGUUGGUUGACUGAGGGGUUCUGCUCAUAAUCCUCCUCUUGUUCGGCUGGCAUUGGGUGUUCCUGUUA	NC_016410.2:2488733:2488816:+	84(nt)	-24.90(kcal/mol)
xxx-m0025-3p	UAAGGUUCGUUGGAUGGCGGA	xxx-m0025	UUUGGAUUUCUUCCGUCAUCAAAUGAACCUUGGAGGUCAAGGAGUCUCAACUAUUGUGGAGCUGUUCUCUAAGGUUCGUUGGAUGGCGGAAGAAUUCCAA	NC_016410.2:29723694:29723793:+	100(nt)	-54.40(kcal/mol)
xxx-m0027-5p	GGCGACUGUUUAUCAAAAACA	xxx-m0027	ACCAGGCCCGGGCGACUGUUUAUCAAAAACACAGGUCUUCGCAAAGUCGUAAGACCAUGUAUGGGGGCUGACGUCUGUCCAGUGCCGGA	NC_016410.2:50525874:50525962:+	89(nt)	-26.60(kcal/mol)
xxx-m0028-5p	CCGGCCUGGUCACUGUGAGGU	xxx-m0028	AAAGUAAUGUCCGGCCUGGUCACUGUGAGGUAAUUAAGUUUUCCAACUAGACGUCGAUAUUGACCAGGGUCGUUCAAAGGCUCC	NC_016410.2:34611167:34611250:-	84(nt)	-23.30(kcal/mol)
xxx-m0029-5p	GUGGUGAUGGAGAUGAGGAG	xxx-m0029	AAGGCUUCCGGUGGUGAUGGAGAUGAGGAGGAUGAAGAUUAAAUAAUUAACUUACAAAUUCUCUUGAUUUUGGUCAUCCUGGUCGCGUG	NC_016410.2:44927035:44927123:-	89(nt)	-31.90(kcal/mol)
xxx-m0031-5p	GCUUCGGAGGCGUGUGUGCG	xxx-m0031	AGCGAGCAAGGCUUCGGAGGCGUGUGUGCGAUCAGACUGUGAAAGUGUGAAGAAAAUAUGAUGGUUGUGAAGUGUUUAUGCAUGGUG	NC_016411.2:16552584:16552670:+	87(nt)	-22.10(kcal/mol)
xxx-m0032-3p	GGCGGGCUUGUGGGCUUAGGUG	xxx-m0032	AGUGUGGGCCUUCCGUGGGCUAUAAUCCAGAAGCCAUGGGCUCGAGAGAUGCUGUGCUUGGCGGGCUUGUGGGCUUAGGUGGGCCUUUUAG	NC_016411.2:33327745:33327835:+	91(nt)	-33.40(kcal/mol)
xxx-m0033-5p	GUGGAGUGGCGUAUCUUGCA	xxx-m0033	CGAUGCAAGGGUGGAGUGGCGUAUCUUGCAGAAACUGGACACUUUGGUGGCAAUAAUUCUCAAAGCAAGAUACUUUCUUCACACAUAUUUUUUCUUGAAGCU	NC_016411.2:34228820:34228921:+	102(nt)	-23.20(kcal/mol)
xxx-m0035-5p	AUAGGAUUGAGAUCUGGGGAG	xxx-m0035	AUACUAAAGUAUAGGAUUGAGAUCUGGGGAGUGUGCUUCUUCUGAAGGUCUCAGAUUCGAUUCUCUCUGGUGUC	NC_016411.2:5156114:5156187:-	74(nt)	-20.90(kcal/mol)
xxx-m0036-5p	CAUCCGAAGCUGCAGCUGCAUU	xxx-m0036	UUGGUCGCGGCAUCCGAAGCUGCAGCUGCAUUGGUAGUGGCAUCCGUAGUAGCAGAAGGUGCAGCUGCAUUGGUCGCGGCAUCCGAA	NC_016411.2:32014758:32014844:-	87(nt)	-37.60(kcal/mol)
xxx-m0037-5p	UCUAAUCUCUGUUCCCAAUUAC	xxx-m0037	CCUUGAAUUCUCUAAUCUCUGUUCCCAAUUACACUUAAUCCAUGAAAAGAUCAAGUGAGUUUGGGAUCAGAAAUUAGAGAUAUCAAUA	NC_016411.2:42295745:42295832:-	88(nt)	-33.90(kcal/mol)
xxx-m0038-3p	AUGUGCCCGUGCCUGCUUGC	xxx-m0038	UGGGCCUAAUGGGAAGUGCAUAUGGCACAAGACUUGGAGGUGCUGCUGUUGAUUAUGUGCCCGUGCCUGCUUGCUAUUGGCAAU	NC_016412.2:9722572:9722655:+	84(nt)	-28.30(kcal/mol)
xxx-m0039-5p	UCUGACGAGGUUGAGGACCA	xxx-m0039	CCAGCAAGCAUCUGACGAGGUUGAGGACCAUCGGGAUGACCCUUCUGCAUCACCAUCUUAGUAUUCACCACCUUAACAGUUAGAGUGUGGGCAUU	NC_016412.2:20603621:20603715:+	95(nt)	-22.30(kcal/mol)
xxx-m0041-5p	GAUUCAGCUUCUGGACUCUCUU	xxx-m0041	UUCUGAAUUUGAUUCAGCUUCUGGACUCUCUUCAAUGUUGAGUGUUAGAUCAGAUUCUGAUGCAUCUUCAGAAU	NC_016412.2:14063827:14063900:-	74(nt)	-23.90(kcal/mol)
xxx-m0043-5p	GAAUAGGAAGUGUGGUUCUG	xxx-m0043	GCUUGCCUCUGAAUAGGAAGUGUGGUUCUGAAGUCUGUUCAGAAGCUAUGGUCCAUCAGAAGCUCUU	NC_016412.2:22380613:22380679:-	67(nt)	-21.30(kcal/mol)
xxx-m0045-5p	GCAUUUGGGUCAAUGGACCUGU	xxx-m0045	UCACGCCGUUGCAUUUGGGUCAAUGGACCUGUGAUCAUAGGUGCAGGUCCAUCUGGUCUUGCAACGGCAGCA	NC_016413.2:39838972:39839043:+	72(nt)	-35.90(kcal/mol)
xxx-m0048-3p	AGAUUGCUAGCCUUACCGGUG	xxx-m0048	AAAUUAGGCAUACUGGUAGUUUGUAAUUCAGUUCAUGGUAGUGAAAUCUACCCUAUUAAUUAAAGAUUGCUAGCCUUACCGGUGUAAAUGUUAG	NC_016413.2:43832860:43832953:-	94(nt)	-20.80(kcal/mol)
xxx-m0049-5p	CAUUUGGAGAGACAUAGACAAA	xxx-m0049	UGGAAACUUUCAUUUGGAGAGACAUAGACAAAUGAAAUUAAAUGAUAAUUUAUUUCAAUGUCUAUCUCUCUCUAAAUGGAAGUGUCCAU	NC_016413.2:43956458:43956546:-	89(nt)	-42.80(kcal/mol)
xxx-m0051-3p	AAGGCGCUUGAGUUAACUCA	xxx-m0051	ACAUUACGUGAGUUAACUCACGCAACCAGCCAAAGGUGGGUGACUUAACUUACGCCACCGUCCAAAGGCGCUUGAGUUAACUCACGUUGCAUGC	NC_016414.2:5459991:5460084:+	94(nt)	-39.10(kcal/mol)
xxx-m0053-3p	CAUGGUCGUGGUCGUGGUCGUGC	xxx-m0053	GGUCGCGAUGGGCCGCCGUAUGCGCACCGUGAUCGUGAUGCUCAUCGUCGUGAUCAUGGUCGUGGUCGUGGUCGUGCCCAUGAUGAU	NW_013656059.1:1178:1264:-	87(nt)	-41.00(kcal/mol)
xxx-m0054-5p	AAAGUGGGUGCGCUGGAUGGC	xxx-m0054	CGAUGAUCGGAAAGUGGGUGCGCUGGAUGGCCUCCGGAUCACCAUCGGGCCACGUGUUCACUGCAUGCUCGUACGC	NW_013656681.1:2594:2669:+	76(nt)	-23.30(kcal/mol)
xxx-m0055-5p	CCGGCAUCGCGGUCGCAGCG	xxx-m0055	CCGGCAUCGCGGUCGCAGCGAUGCUCGCGCUGAGCGUCGGACGACUCGCGCGCCGGC	NW_013656704.1:1:57:+	57(nt)	-34.60(kcal/mol)
xxx-m0056-3p	UUUUAGCUGCAGUGUUGCGUG	xxx-m0056	UAGCUGUUAGUCAUUGUUGCUGCUGCAGUAGGUGUGUGUAUUGCUGCUUGCAUUUUUAGCUGCAGUGUUGCGUGGAAGAAGUCU	NW_013656775.1:4538:4621:+	84(nt)	-22.20(kcal/mol)
xxx-m0058-5p	UGUUCUCGGAUGGAUUUUAGUG	xxx-m0058	AGAUCAAUAUUGUUCUCGGAUGGAUUUUAGUGUUGUUGUUUAAAAACAACAAGCACUUUGUCAUUUCAGCUAGAGCAUGUAAUUUUAUAGUUUGGUUUA	NW_013657219.1:19708:19806:+	99(nt)	-20.80(kcal/mol)
xxx-m0059-5p	UGAGACCUCAGGUCAGGCGG	xxx-m0059	ACGCUUGUGAUGAGACCUCAGGUCAGGCGGGGCUACCCGCUGAAUUUAAGCGUAUCAAUAAGCGG	NW_013657243.1:8572:8636:+	65(nt)	-26.40(kcal/mol)
xxx-m0060-5p	AACGCCCUCGACCUAUUCUCA	xxx-m0060	UCGGGGGAGCAACGCCCUCGACCUAUUCUCAAACUUUAAAUAGGUAGGAUGGUGUGGCUGCUCUGU	NW_013657494.1:27183:27248:+	66(nt)	-26.70(kcal/mol)
xxx-m0061-3p	UAGCCGUGUUGGUCCCUCCUCGGA	xxx-m0061	CCCUUGUAACGCUGCGGGGCGACUAGCAUUUGCUUACGCAGUGCAGGUCAAUAAACAUAGCCGUGUUGGUCCCUCCUCGGAAAAAAUUGUG	NW_013657494.1:52923:53013:-	91(nt)	-21.90(kcal/mol)
xxx-m0062-3p	ACGAGACCUCAGCCUGCUAA	xxx-m0062	UGCAUGGCCGUUCUUAGUUGGUGGAGCGAUUUGUCUGGUUAAUUCCGUUAACGAACGAGACCUCAGCCUGCUAAAUAGCUAUGU	NW_013657494.1:66466:66549:-	84(nt)	-25.50(kcal/mol)
xxx-m0063-3p	UAAAUAGGUAGGACGGUGUGGCU	xxx-m0063	GCAUCGGGGGCGCAACACCCUCGACCUAUUCUCAAAUUUUAAAUAGGUAGGACGGUGUGGCUGAUCUGUUGA	NW_013657497.1:65575:65646:+	72(nt)	-21.70(kcal/mol)
xxx-m0064-3p	UUGAACGGUUUGCAUAUGAUCC	xxx-m0064	UGAGUGGUAGCGUGGAUGUUUGUGUUUGCUGGCUCAAUGCUUUGGCUUUGAACGGUUUGCAUAUGAUCCUGAUCAUUUU	NW_013657497.1:19579:19657:-	79(nt)	-20.60(kcal/mol)
xxx-m0065-3p	AACGAGACCUCAGCCUGCUAA	xxx-m0065	UGCAUGGCCGUUCUUAGUUGGUGGAGCGAUUUGUCUGGUUAAUUCCGUUAACGAACGAGACCUCAGCCUGCUAAAUAGCUAUGU	NW_013657497.1:47750:47833:-	84(nt)	-25.50(kcal/mol)
xxx-m0067-3p	ACGGAGGUGUGCGAAGGUAGGCUC	xxx-m0067	UGCGAGGUGGGUAGUUUAUCUGGGGCGGAUGCCUCCUAAAGAGUAACGGAGGUGUGCGAAGGUAGGCUCAAGCUAAGAU	NW_013657516.1:7984:8062:+	79(nt)	-24.90(kcal/mol)
xxx-m0069-3p	AAUCCGGAGGACCGAGUGCCUUC	xxx-m0069	UCCAGUGGCUGGAAGAGCACCGCACGUCACGUGGAGUCCGGUGCGCCCCUGGCGGCCCUUUAAAAUCCGGAGGACCGAGUGCCUUCCUUGCCCGGU	NW_013657528.1:88841:88936:-	96(nt)	-36.00(kcal/mol)
xxx-m0005-3p	GGGGAUGUAGCUGAAUUUCGUC	xxx-m0005	GCAAGAGUGUGGCGUUUCUCUAAUAUCUUCCUCUUUGAUUCAGUUAACGAAGGGGAUGUAGCUGAAUUUCGUCUCACAGACAU	NC_016408.2:4907664:4907746:-	83(nt)	-20.50(kcal/mol)
xxx-m0006-5p	UUUGACGUUGCGAACCUCUG	xxx-m0006	UGUUUCGGUUUUUGACGUUGCGAACCUCUGGACCUAGGCCGUGCUCCACCGCUCCGUUCUGUCCACAGCCGCAUUGUCUUCAAGCGCCGUCGCAU	NC_016408.2:18030665:18030759:-	95(nt)	-27.70(kcal/mol)
xxx-m0007-5p	CCAUUAAAGUGGUACGUGAGCUGG	xxx-m0007	GACCGUUCGUCCAUUAAAGUGGUACGUGAGCUGGAUUCAGAACGUCGUGAGGCAGUUCGGUCCAUAUCCGCUGUGGGCGUGUAAGUUA	NC_016409.2:39891363:39891450:+	88(nt)	-25.50(kcal/mol)
xxx-m0008-3p	AAAAGUAGGGCGGGGCAAGG	xxx-m0008	GCCGCUUCUAGUUGGCUCGUCCUGCUUGACUGUUGAAAAAGUAGGGCGGGGCAAGGAUGGGACGGG	NC_016409.2:4512940:4513005:-	66(nt)	-29.80(kcal/mol)
xxx-m0010-3p	UAUAGUACCCAUUGCUGCCAAU	xxx-m0010	UUGAGAACAGCUGUUGGUUAAGCAAGGAGUAUGGUAACACAUUUUGUUGUAUAGUACCCAUUGCUGCCAAUCUCAACUCAG	NC_016409.2:43033313:43033393:-	81(nt)	-21.20(kcal/mol)
xxx-m0012-5p	GGCGACUGUUUAUCAAAAACACA	xxx-m0012	ACCAGGCCCGGGCGACUGUUUAUCAAAAACACAGGUCUUCGCAAAGUCGUAAGACCAUGUAUGGGGGCUGACGUCUGUCCAGUGCCGGA	NC_016410.2:50525874:50525962:+	89(nt)	-26.60(kcal/mol)
xxx-m0013-5p	GUGGUGAUGGAGAUGAGGAG	xxx-m0013	AAGGCUUCCGGUGGUGAUGGAGAUGAGGAGGAUGAAGAUUAAAUAAUUAACUUACAAAUUCUCUUGAUUUUGGUCAUCCUGGUCGCGUG	NC_016410.2:44927035:44927123:-	89(nt)	-31.90(kcal/mol)
xxx-m0014-5p	GGUUCGGUCGGAUUUGGGCUU	xxx-m0014	AUAGAUGCUGGGUUCGGUCGGAUUUGGGCUUCGAUGGGCCUGAAAAUUCAAUCCGAGCCCGCCCAUCUAA	NC_016410.2:50038902:50038971:-	70(nt)	-30.90(kcal/mol)
xxx-m0015-3p	GGCGGGCUUGUGGGCUUAGGU	xxx-m0015	GUGUGGGCCUUCCGUGGGCUAUAAUCCAGAAGCCAUGGGCUCGAGAGAUGCUGUGCUUGGCGGGCUUGUGGGCUUAGGUGGGCCUUUUA	NC_016411.2:33327746:33327834:+	89(nt)	-33.40(kcal/mol)
xxx-m0018-5p	UCUAAUCUCUGUUCCCAAUUAC	xxx-m0018	CCUUGAAUUCUCUAAUCUCUGUUCCCAAUUACACUUAAUCCAUGAAAAGAUCAAGUGAGUUUGGGAUCAGAAAUUAGAGAUAUCAAUA	NC_016411.2:42295745:42295832:-	88(nt)	-33.90(kcal/mol)
xxx-m0019-5p	UCUGACGAGGUUGAGGACCA	xxx-m0019	CCAGCAAGCAUCUGACGAGGUUGAGGACCAUCGGGAUGACCCUUCUGCAUCACCAUCUUAGUAUUCACCACCUUAACAGUUAGAGUGUGGGCAUU	NC_016412.2:20603621:20603715:+	95(nt)	-22.30(kcal/mol)
xxx-m0023-5p	GCAUUUGGGUCAAUGGACCUGU	xxx-m0023	UCACGCCGUUGCAUUUGGGUCAAUGGACCUGUGAUCAUAGGUGCAGGUCCAUCUGGUCUUGCAACGGCAGCA	NC_016413.2:39838972:39839043:+	72(nt)	-35.90(kcal/mol)
xxx-m0024-5p	GUUGACCGCUCAUACGACCCCUG	xxx-m0024	CAUGGUCAUUGUUGACCGCUCAUACGACCCCUGCAAUUGCAUUGCAGCUUAUGUGGGGGUUGUAUAACGGUCAACAAAGAUCCUUGA	NC_016413.2:43749379:43749465:+	87(nt)	-43.70(kcal/mol)
xxx-m0025-5p	UUGGGUCAUUUAAUCGGUUGGG	xxx-m0025	CUUAAUGCUUUUGGGUCAUUUAAUCGGUUGGGAAAUCGUCGAUUAAACGAUCCAAUCGACUUUGUGAUUGUUUAAAUGUUUGAGA	NC_016413.2:3544591:3544675:-	85(nt)	-20.80(kcal/mol)
xxx-m0027-3p	AGAUUGCUAGCCUUACCGGUGU	xxx-m0027	AAAAUUAGGCAUACUGGUAGUUUGUAAUUCAGUUCAUGGUAGUGAAAUCUACCCUAUUAAUUAAAGAUUGCUAGCCUUACCGGUGUAAAUGUUAGU	NC_016413.2:43832859:43832954:-	96(nt)	-20.80(kcal/mol)
xxx-m0031-3p	UAUUGAGGGGUUUUCGAAGU	xxx-m0031	CGAAGUCGGUAACUGAAAUCAGAAGCUUCUUGGGUUUGGCUGGUUAUUACCGCAGGUUUAUUGAGGGGUUUUCGAAGUUAGCACUUCC	NW_013657482.1:66013:66100:+	88(nt)	-24.40(kcal/mol)
xxx-m0036-3p	ACGAGACCUCAGCCUGCUAA	xxx-m0036	UGCAUGGCCGUUCUUAGUUGGUGGAGCGAUUUGUCUGGUUAAUUCCGUUAACGAACGAGACCUCAGCCUGCUAAAUAGCUAUGU	NW_013657494.1:41595:41678:-	84(nt)	-25.50(kcal/mol)
xxx-m0037-3p	AUCAUGUGCAGCUCUAUUGA	xxx-m0037	UGAGACCUUGGUAGGGUGUGCCAUGAUAGAUGGUGGAUGUGCGACCCACGAGACCAAAUCAUGUGCAGCUCUAUUGAAUGUGGACUC	NW_013657494.1:65432:65518:-	87(nt)	-27.20(kcal/mol)
xxx-m0038-5p	AAUUGGUCAUCGCGCUUGGUU	xxx-m0038	UGAUUCGCACAAUUGGUCAUCGCGCUUGGUUGAAAAGCCAGUGGCGCGAAGCUACCGUGCGUUGGAUUAU	NW_013657497.1:21183:21252:-	70(nt)	-26.50(kcal/mol)
xxx-m0039-3p	GCCCGCGACGUUGUGAGAAGUCCA	xxx-m0039	UCCGGUGAAGUGUUCGGAUUGCGGCGACGUGGGCGGUCCGCUGCCCGCGACGUUGUGAGAAGUCCACUGAACCUUA	NW_013657497.1:26843:26918:-	76(nt)	-36.50(kcal/mol)
xxx-m0039-5p	UUCGGAUUGCGGCGACGUGGGCGG	xxx-m0039	UCCGGUGAAGUGUUCGGAUUGCGGCGACGUGGGCGGUCCGCUGCCCGCGACGUUGUGAGAAGUCCACUGAACCUUA	NW_013657497.1:26843:26918:-	76(nt)	-36.50(kcal/mol)
xxx-m0041-3p	AACGAGACCUCAGCCUGCUA	xxx-m0041	GCAUGGCCGUUCUUAGUUGGUGGAGCGAUUUGUCUGGUUAAUUCCGUUAACGAACGAGACCUCAGCCUGCUAAAUAGCUAUG	NW_013657528.1:46013:46094:-	82(nt)	-23.50(kcal/mol)

## Sheet: WL1
novel-id		chr-location	length	potential_energy	sequence	read-number
xxx-m0002	CAUGGUCAUUGUUGACCGCUCAUACGACCCCUGCAAUUGCAUUGCAGCUUAUGCGGGGGUCGUAUAAUGGUCAACAGAGACCCUUGA	NC_016407.2:22335089:22335175:+	87(nt)	-49.40(kcal/mol)
xxx-m0004	CGGCUGAAAUUUAUCCGCAGGAAUACCUGAGGAUUUUCAUGCGGUUAUCAUUAUACUAUGGUCACUUCCUGCGGGUAACUGUAUCUUCUGCUGA	NC_016407.2:17965011:17965104:-	94(nt)	-28.30(kcal/mol)
xxx-m0005	CAACAACGGAGCUUUCGGUUGCUGUCCGUCCUCUGUCCUCGCAGCUCAACGUCAAUGGCAGCUCAAAUCCCUCCGUCAACC	NC_016407.2:37807782:37807862:-	81(nt)	-22.80(kcal/mol)
xxx-m0006	CUGUUGCAGCUGCUACUGCAGUUUUCUUGAUCUACCCAAUUGGUCAAGGAAGCUUUUCAGAUGGUAUGCCUCUAGG	NC_016407.2:38650894:38650969:-	76(nt)	-24.40(kcal/mol)
xxx-m0008	AGGGAAUUUCCGGUGGAGCGGUGAAAUGCGUAGAGAUCGGAAGGAACACCAAUGGCGAAAGCGACAUUUUCCAUCGCUCUCGGUUCACCA	NC_016407.2:43192319:43192408:-	90(nt)	-25.70(kcal/mol)
xxx-m0009	UUGCAAAUCAUGUGCGUGCUAGAUCCGAGUUGCGUGAUCCAAAUGUUCAUCACGAAUUGCAAGCAGAUCUAGUGAAGCACAUAUGGACAAAGUUUGGAAU	NC_016407.2:45239539:45239638:-	100(nt)	-24.80(kcal/mol)
xxx-m0010	AUUAUCUCCGAGACGUGAAAACCGGAUUUCAUUUACUGAACCGGGUUUCCGGCUGAGAUUGGUGGGGUCCACUUUCCGGAGAUGGA	NC_016408.2:2972877:2972962:+	86(nt)	-28.80(kcal/mol)
xxx-m0011	CAGCAACAAGCAAAGCCUGGAUGGUGGCUGCAAGUGUUGGAGUUGUGGAAGCUUUGAAAGAUCAAGCUGGUAUCUGUAGGUGGAACUAUGCUU	NC_016408.2:38024931:38025023:+	93(nt)	-24.10(kcal/mol)
xxx-m0012	GUGUAAUUAUAAGUGUCGUGUCGGUGUUUGACACGACACGUGUCAGACAUCGAGACACGUCUAAUUUAAG	NC_016408.2:5891733:5891802:-	70(nt)	-29.60(kcal/mol)
xxx-m0013	GAAGAAUCCAUUUGUGUAUGGUGCUCCUGGAAGUAAGAUUAUUGUAACAACAAGAAUUGCUCACGUGGCAUCAAUUAUGCAGACUGUUGAGCCUUA	NC_016408.2:25743894:25743989:-	96(nt)	-21.40(kcal/mol)
xxx-m0014	UAAUCAGUAAAGUAUAUUAUAUAGAUAAUGAAUACUGAUAAUGAGCUAAGUAACACAUUUAACUCCACAAUUAAAGGACUCGUUGUCUGUAUAAGCUGAAAG	NC_016408.2:30603084:30603185:-	102(nt)	-22.80(kcal/mol)
xxx-m0017	CUUUUGUAUUUAAGUCUCUUCGGCCCAUCGAAUCAAAGAUUUCAUCUCAAAAAUCUCUGGACGAAGAAACUUAAAUAGGGGCA	NC_016409.2:15923234:15923316:+	83(nt)	-20.80(kcal/mol)
xxx-m0018	CAUGGUCAUUGUUGACCGCUCAUACGACCCCUGCAAUUGCAUUGCAGCUUAUGCGGGGGUCGUAUAACGGUCAACAGAGACCCUU	NC_016409.2:22002517:22002601:+	85(nt)	-50.90(kcal/mol)
xxx-m0019	UGACUUAUGAGUUAUGACUAUUGACGCGUUUGGGAGAGUUAUAACCUUUUUAUAGUUUAUUUCCAUAAGCUCUUUAGGGUAGCUUAUAAAACA	NC_016409.2:33433712:33433804:+	93(nt)	-23.10(kcal/mol)
xxx-m0022	UCCAAACUUUGUCCAUAUGUGCUUCACUAGAUCUGCUUGCAAUUCGUGAUGAACAUUUGGAUCACGCAACUCGGAUCUAGCACGCACAUGAUUUGCAAAAGUGG	NC_016409.2:6048259:6048362:-	104(nt)	-30.10(kcal/mol)
xxx-m0023	AUACCAAGCUCAAGAUUUUAUGGGACAAGCUUAUUGUUAAUUGGCCUUAUUAACAGUAAAUUAUGUGGGCAUAUAUCAUCAUGAGUUGAGGCAA	NC_016409.2:26518269:26518362:-	94(nt)	-20.90(kcal/mol)
xxx-m0024	AGCCCAGGUUUAACGAUGGAAUAUGAGGUAGUUGGGGAGGAUAGAUAAGACUGCUAGUUGCUCGAUCAGGACCCUAGAUUUAUUGUGACCCAAAAACCUAUUCCAGGGGC	NC_016409.2:50568170:50568279:-	110(nt)	-26.80(kcal/mol)
xxx-m0025	GACAAACCUCUUGGAACGGAAUGAUCGUCUUUGAAGACGAUAAUUCCGGCAUUUUGAAGAGAAGAAGU	NC_016410.2:4129686:4129753:+	68(nt)	-23.20(kcal/mol)
xxx-m0027	ACAUGAACAAAGAUUCCAACAAGACUCUCAGAUGGUGCAAAGAUGGAGGGAAGCUCUAAUACAAGUCGCUGAUCUCUCUGGUUGGGAUCUACAUGA	NC_016410.2:31496488:31496583:+	96(nt)	-24.80(kcal/mol)
xxx-m0028	AGCAAGGUUAUCCCUUGUUGUCCUCUCAUCAUUCACCAACUGGUCGGAGGAAUUAAGGGAGUAUGUGAAGCC	NC_016410.2:4917568:4917639:-	72(nt)	-21.40(kcal/mol)
xxx-m0029	UAUUUUUUUUUUGCACUGAUUUUGUUUUGGACGGGGAAACACUUGUAUGUUGUUUUCUUGUUGAAGAUUCAGUGCUUACAGAAAAAGC	NC_016410.2:17856539:17856626:-	88(nt)	-29.10(kcal/mol)
xxx-m0030	UGUUAAGUGGCAUAGAUUUUUUGCAGCCGUGUUGAGUCACUUCACCUUCGUUUUUCCACAGGUGCAGUGAAUAAACAGACUGUUAAAUCUUUCAAUUCCCA	NC_016410.2:50482539:50482639:-	101(nt)	-22.90(kcal/mol)
xxx-m0032	CAACAUGAAAAAACCAAAACCUCUGUCCCCCAUCCCUUGAAUAGCUAGGAAGGGCAGAGGCCUUUGGUGUCCUCUCCAGU	NC_016411.2:2234623:2234702:+	80(nt)	-22.50(kcal/mol)
xxx-m0033	GUAAGGAGUUUCAGUGCACGAUGUUUGCAGAGAACUUCAUUGUUAGAAACUCUAAAGCAAGUCUAUAAAUAUCGUGCACUGAAUCUCUUUUACA	NC_016411.2:15342296:15342389:+	94(nt)	-38.20(kcal/mol)
xxx-m0034	AGCGGUAUUGAUAAUGGUGGUGUUGAAGCAUGUGAGAUUGCGUUGAACACCCCACGUCGGUAAUGGUA	NC_016411.2:23103683:23103750:+	68(nt)	-23.40(kcal/mol)
xxx-m0035	CCAUGGCUCCCUUCCUCCUUCUUCCUCGGCUCCUAUCACAGUGGCUACGGCCGGGUGGAUGUUGAAGCUCAGCCUGU	NC_016411.2:28309834:28309910:+	77(nt)	-22.60(kcal/mol)
xxx-m0039	CCAUAUCAGGCUUUCACAAGGUCAGGCUUAGGCCUUCUAAAAAAUUGGCAGGCCAGGGUCAGAUCUUACAAAGCCUAACUCGG	NC_016411.2:41387084:41387166:+	83(nt)	-30.40(kcal/mol)
xxx-m0040	UUGGUGGUUUAAUUAGAAGAGGUGAUGAAGUUGUGUAAUUUGAUUGCAGCUUUCUAGUUGUUGCCACUA	NC_016411.2:1515213:1515281:-	69(nt)	-23.30(kcal/mol)
xxx-m0041	UUAAAGAGAGCGAGCUCUGGGCUUUACCGCAUGAGAAUUCUAUUUUCCCAGCUCUAAGGUUGAGCUACUUUCAUUUAU	NC_016411.2:17983294:17983371:-	78(nt)	-20.90(kcal/mol)
xxx-m0042	UUGGGAGCUUAGUGAACAAAUGCGAGAAGUAGUAUCGCGCAAUUACUUGAAGUUCUUCUUCUUUUCGACAAACUGUGCCAUUUGAGUUUUCAAG	NC_016411.2:20861193:20861286:-	94(nt)	-21.20(kcal/mol)
xxx-m0044	CCUUGAAUUCUCUAAUCUCUGUUCCCAAUUACACUUAAUCCAUGAAAAGAUCAAGUGAGUUUGGGAUCAGAAAUUAGAGAUAUCAAUA	NC_016411.2:42295745:42295832:-	88(nt)	-33.90(kcal/mol)
xxx-m0047	GUUGAUUGAAAGCAAAAGAAAGGGGAAUGGAUUGUCUCCAGUCCAAUUUUCUCCUGUUUUCUCCUGUGAAGCAAUCUGA	NC_016412.2:35241117:35241195:-	79(nt)	-25.10(kcal/mol)
xxx-m0048	UGGACCGAGAGCAGUGAAAAUCUCACCAUCCAAUUGUUCUAACAUGUUCGAUAGGGUCAAACGAGUGGCUGAGAUCUCACUGAACUCACCCG	NC_016413.2:23874135:23874226:+	92(nt)	-27.50(kcal/mol)
xxx-m0049	AGUGGGGGCAACAAUGUGGUGGAACAUGGCUUAGGAUUUGCCAGGUUGGGUUAGUGGCUGCACCAUGCUGGCCUGCCCACUC	NC_016413.2:37147500:37147581:+	82(nt)	-26.30(kcal/mol)
xxx-m0050	UCACGCCGUUGCAUUUGGGUCAAUGGACCUGUGAUCAUAGGUGCAGGUCCAUCUGGUCUUGCAACGGCAGCA	NC_016413.2:39838972:39839043:+	72(nt)	-35.90(kcal/mol)
xxx-m0052	AGCUCACUCUUUGUCUGGUCUCUCUGAUAGUGACUGUUGGUUGUUGUUCAAACAACAUGCAUUUAGACAUUACAGAGAAGAGCAUACAAAGCUUGUGGAAA	NC_016413.2:26707899:26707999:-	101(nt)	-34.20(kcal/mol)
xxx-m0053	AUGUAUUCAUCGACCGCAUCUGCUGCCACACCAUAUGCUAACAUUCGCAUUGCUGUGGUACAUUUUGCUAACGGUGAUAUACCU	NC_016413.2:32128962:32129045:-	84(nt)	-26.30(kcal/mol)
xxx-m0055	GCUUUGUGGGCUAGCAGUGCAGCAGCCUGUUAUCCCUCCACUGUCAAGAGGCGGCAGUACUCGCUGCUCUGUGAAGCC	NC_016413.2:37147662:37147739:-	78(nt)	-29.50(kcal/mol)
xxx-m0057	UAGCGCAGCUUGGUAGCGCGUUUGUUUUGGGUACAAAAUGUCACAGGUUCAAAUCCUGUCAUCCCUAUCCCUAACUAGUAGUUAUCGUAUCAGCAG	NC_016414.2:17652459:17652554:+	96(nt)	-20.30(kcal/mol)
xxx-m0059	UGUCUUUGUAAUUGCCCAUCUUUCGGACGUACUUGAUGAUGUGGUUCUGGGGACAAGUCAGCCCGUUGUAUCGGUCGAAAUCUGGGAUUUUGAACUUUUUAGGGACAU	NC_016414.2:27609823:27609930:+	108(nt)	-24.40(kcal/mol)
xxx-m0060	AACUUUGUCCAUAUGUGCUUCACUAGAUCUGCUUGCAAUUCGUGAUGAACAUUUGGAUCACGCAACUCGGAUCUAGCACGCACAUGAUUUGCAAAAGUG	NC_016414.2:1634387:1634485:-	99(nt)	-29.70(kcal/mol)
xxx-m0064	GAACAAGUGGACAUGAGAUGGGUUAGACCCAAACCCGAUCCUAACUUAGACCAAAUCAAUUAUGGGUCAUGAUAACUUGUGUUAUAAAAACACAUGUUA	NC_016414.2:14441574:14441672:-	99(nt)	-20.70(kcal/mol)
xxx-m0065	UUAAAGCGCUCCUGAAGAAAUAGUGCUCCUGAAGUGAUGACGUCAUCAGAAGCAAGUUCAUCAGAAGCAAGUUUAUC	NC_016414.2:22674001:22674077:-	77(nt)	-20.90(kcal/mol)
xxx-m0069	GCGAUGGGCCGCCGUAUGCGCACCGUGAUCGUGAUGCUCAUCGUCGUGAUCAUGGUCGUGGUCGUGGUCGUGCCCAUGAU	NW_013656059.1:1181:1260:-	80(nt)	-38.10(kcal/mol)
xxx-m0071	AUGCUCCUUCACGUUUGUUGCUGACUGCUGUAAAUCUGGAGGCCUACUCGAAGGCGCAAAGGAAAUAGUUGGUCAUAGCAAGAUUGGAUCUA	NW_013657209.1:6734:6825:-	92(nt)	-22.50(kcal/mol)
xxx-m0072	UUCCAGACGCACGGUUUCCGGCACGUCGUAUCCCUCUAAAGGAAAAACAACGUGGUCGGGAAAAAUGUAGGGAU	NW_013657294.1:6583:6656:-	74(nt)	-21.90(kcal/mol)
xxx-m0073	ACGCUUGUGAUGAGACCUCAGGUCAGGCGGGGCUACCCGCUGAAUUUAAGCAUAUCAAUAAGCGG	NW_013657397.1:34959:35023:+	65(nt)	-25.30(kcal/mol)
xxx-m0075	UAGGAGGGCGCGGCGGUCGCUGCAAAACCCGGGGCGUGAGCCUGGGCGGAGCGGUCGUCGGUGCAGAUCUUGG	NW_013657494.1:16012:16084:+	73(nt)	-33.90(kcal/mol)
xxx-m0076	GCGCCACUGGCUUUUCAACCAAGCGCGAUGACCAAUUGUGCGAAUCAACGGUUCCUCUCGUACUAGGUUGAAUUACUAUUGCGACA	NW_013657494.1:45284:45369:+	86(nt)	-24.10(kcal/mol)
xxx-m0077	ACAGGGAUAACUGGCUUGUGGCAUCCAAGCGUUCAUAGCGACGUUGCUUUUUGAUCCUUCGAUGUCGGCUAUUCCUAU	NW_013657494.1:76894:76971:-	78(nt)	-21.60(kcal/mol)
xxx-m0080	GUUGAUUCGCACAAUUGGUCAUCGCGCUUGGUUGAAAAGCCAGUGGCGCGAAGCUACCGUGCGUUGGAUUAUG	NW_013657497.1:39574:39646:+	73(nt)	-26.70(kcal/mol)
xxx-m0081	AUCAAGUUUUGAAUGACUUUCUAGUCAGAUCGUUCCUGCGUUUCGGAUAUGAAGUCUCAUUCGAAGCUUUAG	NW_013657516.1:37212:37283:-	72(nt)	-21.20(kcal/mol)
xxx-m0082	UCGAACCGUCUAGUAGCUGGUUCCCUCCGAAUUUUCCCUCAGGAUAGCUGGAGCCCGAGGGCGAGUUUUAUCGGGCAAAGCCAAUGAUUAGAGGCAUCGGG	NW_013657528.1:41167:41267:-	101(nt)	-32.30(kcal/mol)
xxx-m0083	GGUGGGCCAAAUCACGUCGGGAGCACGUGCUCGGGCCAAACCACGUCGGGGGGCAGAAAUUCCUCGAGCGCGCCUGCGCGCCCGUGUUAUUAAGGUCAUACCG	NW_013657528.1:95998:96100:-	103(nt)	-39.80(kcal/mol)
		18
		11
		269
		19
		10
		19
		12
		30
		17
		10
		46
		10
		67
		36
		11
		11
		10
		10
		60
		19
		10
		11
		22
		36
		22
		45
		11
		18
		18
		30
		145
		10
		27
		64
		35
		10
		10
		11
		43
		32
		10
		17
		33
		18
		186
		12
		30
		12
		79
		13
		225
		14
		231
		11

## Sheet: WL2
novel-id		chr-location	length	potential_energy	sequence	read-number
xxx-m0003	AGUGUACCAAUAUUCUUUUGGUUCGAGUUCAAGUGGUUAGUCUCGUAACGACUAUGAAUGAACUAGCUUUGCUUGGAUCAAAUAGAAAGUAAAAAGGAA	NC_016407.2:18126650:18126748:+	99(nt)	-22.30(kcal/mol)
xxx-m0005	CGGCUGAAAUUUAUCCGCAGGAAUACCUGAGGAUUUUCAUGCGGUUAUCAUUAUACUAUGGUCACUUCCUGCGGGUAACUGUAUCUUCUGCUGA	NC_016407.2:17965011:17965104:-	94(nt)	-28.30(kcal/mol)
xxx-m0006	CAACAACGGAGCUUUCGGUUGCUGUCCGUCCUCUGUCCUCGCAGCUCAACGUCAAUGGCAGCUCAAAUCCCUCCGUCAACC	NC_016407.2:37807782:37807862:-	81(nt)	-22.80(kcal/mol)
xxx-m0007	UGUUGCAGCUGCUACUGCAGUUUUCUUGAUCUACCCAAUUGGUCAAGGAAGCUUUUCAGAUGGUAUGCCUCUAGG	NC_016407.2:38650894:38650968:-	75(nt)	-23.90(kcal/mol)
xxx-m0008	AGGGAAUUUCCGGUGGAGCGGUGAAAUGCGUAGAGAUCGGAAGGAACACCAAUGGCGAAAGCGACAUUUUCCAUCGCUCUCGGUUCACCA	NC_016407.2:43192319:43192408:-	90(nt)	-25.70(kcal/mol)
xxx-m0009	CAACGUCGGUUGUCUAGUUGGUAAGGAUUCAACUCAGCUCCCACAAGGACCUGAGUUCGAAUCCCCUGCCGAUGUGAGGACCAAAUACC	NC_016407.2:43369744:43369832:-	89(nt)	-39.40(kcal/mol)
xxx-m0010	CUGCCCACUCCAAGUUGAGAGUUGGCCAAUGUGACCUAGGCGAAGGCUUGAGUCUCCUUGGUCCUAGACUGGAGGGCAC	NC_016407.2:46621488:46621566:-	79(nt)	-31.70(kcal/mol)
xxx-m0012	UAAUCAGUAAAGUAUAUUAUAUAGAUAAUGAAUACUGAUAAUGAGCUAAGUAACACAUUUAACUCCACAAUUAAAGGACUCGUUGUCUGUAUAAGCUGAAAG	NC_016408.2:30603084:30603185:-	102(nt)	-22.80(kcal/mol)
xxx-m0013	ACUUAAUGCUUUUGGGUCAUUUAAUCGGUUGGGAAAUCGUCGAUUAAACGAUCCAAUCGACUUUGUGAUUAUUUAAAUGUUUGAGA	NC_016409.2:49434461:49434546:+	86(nt)	-20.80(kcal/mol)
xxx-m0014	UUGAGAACAGCUGUUGGUUAAGCAAGGAGUAUGGUAACACAUUUUGUUGUAUAGUACCCAUUGCUGCCAAUCUCAACUCAG	NC_016409.2:43033313:43033393:-	81(nt)	-21.20(kcal/mol)
xxx-m0015	AGCCCAGGUUUAACGAUGGAAUAUGAGGUAGUUGGGGAGGAUAGAUAAGACUGCUAGUUGCUCGAUCAGGACCCUAGAUUUAUUGUGACCCAAAAACCUAUUCCAGGGGC	NC_016409.2:50568170:50568279:-	110(nt)	-26.80(kcal/mol)
xxx-m0016	UAGCGCAGCUUGGUAGCGCGUUUGUUUUGGGUACAAAAUGUCACAGGUUCAAAUCCUGUCAUCCCUAUCCCUAACUAGUAGUUAUCGUAUCAGCAG	NC_016410.2:18053689:18053784:+	96(nt)	-20.30(kcal/mol)
xxx-m0017	AACAUGAACAAAGAUUCCAACAAGACUCUCAGAUGGUGCAAAGAUGGAGGGAAGCUCUAAUACAAGUCGCUGAUCUCUCUGGUUGGGAUCUACAUGAU	NC_016410.2:31496487:31496584:+	98(nt)	-24.80(kcal/mol)
xxx-m0018	UGUUAAGUGGCAUAGAUUUUUUGCAGCCGUGUUGAGUCACUUCACCUUCGUUUUUCCACAGGUGCAGUGAAUAAACAGACUGUUAAAUCUUUCAAUUCCCA	NC_016410.2:50482539:50482639:-	101(nt)	-22.90(kcal/mol)
xxx-m0019	AUGGUCAUUGUUGACCGCUCAUACGACCCCUGCUUAUGCGGAAGUCAUAUAACGGUCAAUAGAGACCAUU	NC_016410.2:53269265:53269334:-	70(nt)	-31.20(kcal/mol)
xxx-m0021	CAACAUGAAAAAACCAAAACCUCUGUCCCCCAUCCCUUGAAUAGCUAGGAAGGGCAGAGGCCUUUGGUGUCCUCUCCAGU	NC_016411.2:2234623:2234702:+	80(nt)	-22.50(kcal/mol)
xxx-m0022	GCCAUAUGGGCUGAGAAUACUGCAGCCUGUGAUCCCUCCACUGUCAAGAGAAGGAAGUGUUCACUGCUCUGUGAAACCAGCCUCAUGCGGA	NC_016411.2:39310535:39310625:+	91(nt)	-26.70(kcal/mol)
xxx-m0025	UUAAAGAGAGCGAGCUCUGGGCUUUACCGCAUGAGAAUUCUAUUUUCCCAGCUCUAAGGUUGAGCUACUUUCAUUUAU	NC_016411.2:17983294:17983371:-	78(nt)	-20.90(kcal/mol)
xxx-m0026	UUGGGAGCUUAGUGAACAAAUGCGAGAAGUAGUAUCGCGCAAUUACUUGAAGUUCUUCUUCUUUUCGACAAACUGUGCCAUUUGAGUUUUCAAG	NC_016411.2:20861193:20861286:-	94(nt)	-21.20(kcal/mol)
xxx-m0028	CCUUGAAUUCUCUAAUCUCUGUUCCCAAUUACACUUAAUCCAUGAAAAGAUCAAGUGAGUUUGGGAUCAGAAAUUAGAGAUAUCAAUA	NC_016411.2:42295745:42295832:-	88(nt)	-33.90(kcal/mol)
xxx-m0030	AGUGGGGGCAACAAUGUGGUGGAACAUGGCUUAGGAUUUGCCAGGUUGGGUUAGUGGCUGCACCAUGCUGGCCUGCCCACUC	NC_016413.2:37147500:37147581:+	82(nt)	-26.30(kcal/mol)
xxx-m0031	UCACGCCGUUGCAUUUGGGUCAAUGGACCUGUGAUCAUAGGUGCAGGUCCAUCUGGUCUUGCAACGGCAGCA	NC_016413.2:39838972:39839043:+	72(nt)	-35.90(kcal/mol)
xxx-m0033	UUGCAGCUGCUACUGCAGUUUUCUUGAUCUACCCAAUUGGUCAAGGAAGCUUUUCAGAUGGUAUGCCUCUA	NC_016413.2:6942405:6942475:-	71(nt)	-23.90(kcal/mol)
xxx-m0034	AGGAGGUUGCGUACAUGGCUCCUCAUUAGUUGUUUUGCAACACAUACAUUUGGGAUCUCAAUUGAUGAGUCUGCAGUAAUCUCC	NC_016413.2:41070722:41070805:-	84(nt)	-24.20(kcal/mol)
xxx-m0036	GAACAAGUGGACAUGAGAUGGGUUAGACCCAAACCCGAUCCUAACUUAGACCAAAUCAAUUAUGGGUCAUGAUAACUUGUGUUAUAAAAACACAUGUUA	NC_016414.2:14441574:14441672:-	99(nt)	-20.70(kcal/mol)
xxx-m0038	AUGCUCCUUCACGUUUGUUGCUGACUGCUGUAAAUCUGGAGGCCUACUCGAAGGCGCAAAGGAAAUAGUUGGUCAUAGCAAGAUUGGAUCUA	NW_013657209.1:6734:6825:-	92(nt)	-22.50(kcal/mol)
xxx-m0039	CAUCGGGGGAGCAACGCCCUCGACCUAUUCUCAAACUUUAAAUAGGUAGGAUGGUGUGGCUGCUCUGUUGA	NW_013657494.1:27181:27251:+	71(nt)	-28.40(kcal/mol)
xxx-m0040	GCGCCACUGGCUUUUCAACCAAGCGCGAUGACCAAUUGUGCGAAUCAACGGUUCCUCUCGUACUAGGUUGAAUUACUAUUGCGACA	NW_013657494.1:76699:76784:+	86(nt)	-24.10(kcal/mol)
xxx-m0044	GGCAUCGGGGGCGCAACACCCUCGACCUAUUCUCAAAUUUUAAAUAGGUAGGACGGUGUGGCUGAUCUGUUGAG	NW_013657497.1:65574:65647:+	74(nt)	-21.70(kcal/mol)
xxx-m0048	AUCAAGUUUUGAAUGACUUUCUAGUCAGAUCGUUCCUGCGUUUCGGAUAUGAAGUCUCAUUCGAAGCUUUAG	NW_013657516.1:37212:37283:-	72(nt)	-21.20(kcal/mol)
xxx-m0049	UGGCUGGAAGAGCACCGCACGUCACGUGGAGUCCGGUGCGCCCCUGGCGGCCCUUUAAAAUCCGGAGGACCGAGUGCCUUCCUUGCCC	NW_013657528.1:88844:88931:-	88(nt)	-34.70(kcal/mol)
		11
		10
		99
		50
		35
		37
		10
		18
		21
		17
		13
		57
		41
		11
		42
		16
		36
		10
		13
		83
		10
		20
		26
		15
		13
		10
		10
		27
		37
		11
		18

## Sheet: WL3
novel-id		chr-location	length	potential_energy	sequence	read-number
xxx-m0002	CAACAACGGAGCUUUCGGUUGCUGUCCGUCCUCUGUCCUCGCAGCUCAACGUCAAUGGCAGCUCAAAUCCCUCCGUCAACC	NC_016407.2:37807782:37807862:-	81(nt)	-22.80(kcal/mol)
xxx-m0003	UGUUGCAGCUGCUACUGCAGUUUUCUUGAUCUACCCAAUUGGUCAAGGAAGCUUUUCAGAUGGUAUGCCUCUAGG	NC_016407.2:38650894:38650968:-	75(nt)	-23.90(kcal/mol)
xxx-m0004	AGGGAAUUUCCGGUGGAGCGGUGAAAUGCGUAGAGAUCGGAAGGAACACCAAUGGCGAAAGCGACAUUUUCCAUCGCUCUCGGUUCACCA	NC_016407.2:43192319:43192408:-	90(nt)	-25.70(kcal/mol)
xxx-m0005	CAACGUCGGUUGUCUAGUUGGUAAGGAUUCAACUCAGCUCCCACAAGGACCUGAGUUCGAAUCCCCUGCCGAUGUGAGGACCAAAUACC	NC_016407.2:43369744:43369832:-	89(nt)	-39.40(kcal/mol)
xxx-m0006	CAUGGUCAUUGUUGACCGCUCAUACGACCCCUGCAAUUGCAUUGCAGCUUAUGCAAGGGUCGUAUAACGGUCAACAGAAACCCUUGA	NC_016408.2:5939265:5939351:+	87(nt)	-40.40(kcal/mol)
xxx-m0007	UGGUGCCAUUAUUCCUACUUCUGCGGCUAUCGGUUUGCACUUUUACCCAAUAUGGGAAGCUGCAUCCGUUGAUGAAUGGUUAUA	NC_016408.2:37873475:37873558:-	84(nt)	-20.10(kcal/mol)
xxx-m0009	AGCCCAGGUUUAACGAUGGAAUAUGAGGUAGUUGGGGAGGAUAGAUAAGACUGCUAGUUGCUCGAUCAGGACCCUAGAUUUAUUGUGACCCAAAAACCUAUUCCAGGGGC	NC_016409.2:50568170:50568279:-	110(nt)	-26.80(kcal/mol)
xxx-m0010	CUACUACCUGGACCAAACCAGCCGCGGCUUCCACACAAAGCCUUUUGUUUAAAGGCUUUGUGUGGAAGCCACGACCGGUUUGGUCCGGGUAGUAGA	NC_016410.2:4925725:4925820:+	96(nt)	-77.30(kcal/mol)
xxx-m0011	UAGCGCAGCUUGGUAGCGCGUUUGUUUUGGGUACAAAAUGUCACAGGUUCAAAUCCUGUCAUCCCUAUCCCUAACUAGUAGUUAUCGUAUCAGCAG	NC_016410.2:18053689:18053784:+	96(nt)	-20.30(kcal/mol)
xxx-m0012	CAACAUGAAAAAACCAAAACCUCUGUCCCCCAUCCCUUGAAUAGCUAGGAAGGGCAGAGGCCUUUGGUGUCCUCUCCAGU	NC_016410.2:18193311:18193390:+	80(nt)	-22.50(kcal/mol)
xxx-m0013	ACAUGAACAAAGAUUCCAACAAGACUCUCAGAUGGUGCAAAGAUGGAGGGAAGCUCUAAUACAAGUCGCUGAUCUCUCUGGUUGGGAUCUACAUGA	NC_016410.2:31496488:31496583:+	96(nt)	-24.80(kcal/mol)
xxx-m0014	UCUCUCCUCCGUUGGUGCUUGUCUCAUAUUCCAUCUCCUUGUAGAGCUGCGUUGCUGCCUUUACUUCUUUGGACGGCCAUGAGACACACAUUUUUUCCCAUAU	NC_016410.2:55540015:55540117:+	103(nt)	-21.00(kcal/mol)
xxx-m0015	UCCAGUAGUUAUUGAUGGUAUUCGUGAGCCUGUUUCUGGAUCUCAACUUUACGGAAAUAAUAUUAUUUAUGGUGCCAUUGUUCCUACUUCU	NC_016410.2:525604:525694:-	91(nt)	-20.50(kcal/mol)
xxx-m0017	UGACAACAUGAAAAAACCAAAACCUCUGUCCCCCAUCCCUUGAAUAGCUAGGAAGGGCAGAGGCCUUUGGUGUCCUCUCCAGUC	NC_016411.2:2234620:2234703:+	84(nt)	-23.50(kcal/mol)
xxx-m0020	CCUUGAAUUCUCUAAUCUCUGUUCCCAAUUACACUUAAUCCAUGAAAAGAUCAAGUGAGUUUGGGAUCAGAAAUUAGAGAUAUCAAUA	NC_016411.2:42295745:42295832:-	88(nt)	-33.90(kcal/mol)
xxx-m0022	CACUCCGUUGCAUUUAGUUCAGUGGACGUGUGAUCAUAUGUGCAAGUCCAUCUGACCUAGCGACGACAAC	NC_016413.2:31290770:31290839:-	70(nt)	-23.60(kcal/mol)
xxx-m0025	GAACAAGUGGACAUGAGAUGGGUUAGACCCAAACCCGAUCCUAACUUAGACCAAAUCAAUUAUGGGUCAUGAUAACUUGUGUUAUAAAAACACAUGUUA	NC_016414.2:14441574:14441672:-	99(nt)	-20.70(kcal/mol)
xxx-m0026	CGGUGAAGUGUUCGGAUUGCGGCGACGUGGGCGGUCCGCUGCCUGCGACGUUGUGAGAAGUCCACUGAACCU	NW_013657243.1:7868:7939:+	72(nt)	-33.60(kcal/mol)
xxx-m0027	GAUUGAAUGGUCCGGUGAAGUGUUCGGAUUGCGGCGACGUGGGCGGUCCGCUGCCUGCGACGUUGUGAGAAGUCCACUGAACCUUAUCAUUUAGAG	NW_013657397.1:25467:25562:+	96(nt)	-40.20(kcal/mol)
xxx-m0029	UUGAUUCGCACAAUUGGUCAUCGCGCUUGGUUGAAAAGCCAGUGGCGCGAAGCUACCGUGCGUUGGAUUAU	NW_013657494.1:37412:37482:-	71(nt)	-26.70(kcal/mol)
xxx-m0033	AUCAAGUUUUGAAUGACUUUCUAGUCAGAUCGUUCCUGCGUUUCGGAUAUGAAGUCUCAUUCGAAGCUUUAG	NW_013657516.1:37212:37283:-	72(nt)	-21.20(kcal/mol)
xxx-m0034	UCCAGUGGCUGGAAGAGCACCGCACGUCACGUGGAGUCCGGUGCGCCCCUGGCGGCCCUUUAAAAUCCGGAGGACCGAGUGCCUUCCUUGCCCGG	NW_013657528.1:88842:88936:-	95(nt)	-35.40(kcal/mol)
		49
		16
		23
		35
		26
		13
		12
		11
		11
		10
		35
		11
		17
		11
		56
		10
		16
		29
		21
		14
		10
		43

[truncated: 20 more sheets: WR1, WR2, WR3, Sheet2, 3p&5p, 去重复前体, Sheet3, 编号, 去重复miRNA, Sheet8, Sheet11, Sheet4, Sheet5, Sheet6, Sheet7, GC CON, GC SCREEN, Sheet9, gc screen2, 重新编号]
