# Supplementary material for: Identification of Drought-Responsive microRNAs from Roots and Leaves of Alfalfa by High-Throughput Sequencing
Source: Preprints.org preprint supplement (doi:10.20944/preprints201702.0085.v1), 2017-02-23
Supplement: Supplementary file 2 [file Table S1: Members and expression abundance of known miRNAs from leaves of alfalfa treated with drought and irrigation.xls]

miRNA_ID	WL-1	WL-2	WL-3	DL-1	DL-2	DL-3	WL-1,WL-2,WL-3	DL-1,DL-2,DL-3	up/down	|log2(foldchange)|	P-value	Significance-Lable
mtr-miR156g-3p	2.3780	0.7445	0.0000	20.0024	11.3907	21.2767	1.04083333333333	17.5566	up	4.07620250429356	0.00127582076161424	**
aly-miR157a-3p	13.1129	4.9633	3.3069	93.7661	59.2965	113.7178	7.1277	88.9268	up	3.64110975049613	0.000234387171584312	**
ahy-miR3512	9.0363	7.6931	5.5532	1.6603	1.2118	0.0000	7.42753333333333	0.957366666666667	down	2.95573969393205	4.47185119026426e-07	**
gma-miR319d	230.7320	54.4100	24.0221	787.7620	537.3035	490.8965	103.0547	605.320666666667	up	2.55428930477606	7.7989274874508e-06	**
mtr-miR5213-5p	2491.4435	557.6246	372.1868	6620.4735	7215.8306	6897.7762	1140.4183	6911.3601	up	2.59940655418511	1.21681981412564e-05	**
mtr-miR5294a	11.1425	4.7772	3.2445	52.0220	47.0979	61.9766	6.38806666666667	53.6988333333333	up	3.07143947031539	0.00247432994747028	**
gma-miR5368	28.8755	35.4254	25.8940	12.4916	8.0785	9.1071	30.0649666666667	9.8924	down	1.60369087749281	4.20207759110579e-06	**
hbr-miR6173	5.9789	5.7698	4.0557	2.6090	1.9388	1.1283	5.26813333333333	1.89203333333333	down	1.4773543538996	0.000284210813453901	**
hbr-miR6483	6.9301	6.0800	5.0540	0.0000	0.0000	0.0000	6.02136666666667	0	down	15.8778033514928	1.05378241462277e-05	**
han-miR3630-3p	25.2745	15.9445	7.9866	8.4595	5.0895	4.1103	16.4018666666667	5.88643333333333	down	1.47839435852627	1.08748317287727e-08	**
atr-miR319a	37.4362	5.7078	2.2462	91.8687	90.4796	40.9416	15.1300666666667	74.4299666666667	up	2.29846524541753	0.00761367967373731	**
gma-miR396a-3p	6.3866	0.8686	0.0000	21.5045	19.9540	8.1400	2.4184	16.5328333333333	up	2.77320920015001	0.0152862564124871	*
mtr-miR2643a	128.2750	21.7764	7.8618	249.3578	363.9381	133.9468	52.6377333333333	249.0809	up	2.24244512648259	0.0133135590172176	*
aly-miR159b-3p	46.9481	8.2515	1.7471	88.3109	99.6084	46.7444	18.9822333333333	78.2212333333333	up	2.0429105425671	0.0401717754097275	*
aly-miR165a-5p	23.2363	8.0653	4.4924	92.1849	76.2614	24.6617	11.9313333333333	64.3693333333333	up	2.43161825303935	0.0387655817627648	*
aly-miR166a-5p	96.5460	37.9691	21.2767	314.1877	300.6832	112.1865	51.9306	242.352466666667	up	2.22244996698636	0.0249553783757009	*
aly-miR167a-5p	51.6361	8.0653	2.1838	90.2875	103.8900	53.0307	20.6284	82.4027333333333	up	1.99806026715411	0.0419519805233942	*
aly-miR168a-3p	37.9118	15.2000	9.2345	98.5888	85.6325	138.7824	20.7821	107.6679	up	2.37317484144299	0.0492187170698896	*
osa-miR5083	3.6689	1.2408	0.6240	0.0000	0.0000	0.0000	1.84456666666667	0	down	14.1709943116732	0.0197916021982185	*
mtr-miR5232	40.2218	13.6490	7.3626	92.2640	77.8771	121.2936	20.4111333333333	97.1449	up	2.25078196730062	0.0441130137093658	*
hbr-miR166a	111.6292	44.4834	19.5921	303.7516	217.8782	145.1493	58.5682333333333	222.2597	up	1.92405610104225	0.030093642618425	*
cme-miR319c	9.5119	0.6204	0.0000	24.5879	23.7509	9.8324	3.37743333333333	19.3904	up	2.52134336697178	0.0249972017408346	*
cme-miR166g	1426.9918	473.6211	184.8143	2834.9627	2417.5024	2703.1139	695.1424	2651.85966666667	up	1.93162398225761	0.0242891758006524	*
atr-miR167	736.2226	136.4902	72.6279	1404.9107	1439.1915	718.9767	315.113566666667	1187.69296666667	up	1.91421815627957	0.0175591824396085	*
gma-miR319q	7.6775	2.3576	1.8719	46.8831	23.0238	20.9544	3.969	30.2871	up	2.93185597876105	0.0109656245117828	*
osa-miR166c-5p	0.0000	0.0000	0.0000	1.2650	0.0000	0.9671	0	0.744033333333333	up	12.8611515414221	1
osa-miR396a-3p	1.0191	0.0000	0.0000	1.1859	1.8581	0.0000	0.3397	1.01466666666667	up	1.57867273479056	1
osa-miR166i-3p	1.0871	0.0000	0.0000	2.0556	0.0000	0.9671	0.362366666666667	1.00756666666667	up	1.47535314311236	0.999999999999998
zma-miR171b-3p	2.4459	0.7445	0.0000	4.0321	5.8165	1.4507	1.06346666666667	3.76643333333333	up	1.82442417942159	0.769454048456202
mtr-miR399b	4.3483	1.3649	0.0000	2.1346	8.5632	2.0954	1.9044	4.2644	up	1.16300623498856	1
mtr-miR399d	0.0000	0.0000	0.0000	0.0000	1.0502	0.0000	0	0.350066666666667	up	11.7734139796071	1
gma-miR396b-3p	1.4947	1.6131	0.7487	3.0834	4.6048	1.7731	1.2855	3.15376666666667	up	1.29474631524049	0.789787210561978
zma-miR399e-5p	0.8832	0.9927	0.0000	1.8184	3.4738	1.7731	0.6253	2.3551	up	1.91316789711167	1
ptc-miR166p	0.6794	0.6204	0.0000	0.0000	0.0000	0.0000	0.433266666666667	0	down	12.0810395319237	0.509033636149523
ptc-miR167h-5p	0.9512	0.0000	0.0000	1.3440	1.1310	0.8865	0.317066666666667	1.1205	up	1.82128452937325	1
ptc-miR396e-3p	0.0000	0.7445	0.0000	3.3996	3.7161	2.3372	0.248166666666667	3.15096666666667	up	3.66641323930669	0.474983762993676
ppt-miR319a	0.6794	0.0000	0.0000	2.9253	2.5043	0.0000	0.226466666666667	1.80986666666667	up	2.99851279490751	0.637797984982591
mtr-miR166b	0.0000	0.0000	0.0000	1.0278	2.0196	1.6925	0	1.57996666666667	up	13.9476065010265	0.262535117880079
mtr-miR166d	4.4842	2.2335	1.3727	6.4039	3.3930	9.0265	2.6968	6.27446666666667	up	1.21824430191861	0.867296092202595
mtr-miR156c-3p	1.9703	1.1167	0.0000	4.9018	6.2205	6.5281	1.029	5.88346666666667	up	2.51542349069862	0.220735252659339
mtr-miR166e-5p	28.9434	11.9119	4.9292	62.8533	50.1677	27.9660	15.2615	46.9956666666667	up	1.62263096957935	0.647234018486172
ghr-miR156c	10.9387	1.2408	0.0000	9.2501	17.2073	11.0413	4.05983333333333	12.4995666666667	up	1.62238567321926	0.322879529789056
pta-miR319	3.9407	0.0000	0.0000	8.2223	6.3013	2.4178	1.31356666666667	5.64713333333333	up	2.10402927233301	0.314504417955555
ppt-miR166j	0.7474	0.0000	0.0000	0.0000	0.0000	0.0000	0.249133333333333	0	down	11.2827023476596	1
ppt-miR1026a	2.3780	0.0000	0.0000	4.2693	5.3318	2.0148	0.792666666666667	3.87196666666667	up	2.28828031830131	0.31550955446364
smo-miR171a	0.9512	0.0000	0.0000	1.1859	1.2926	0.0000	0.317066666666667	0.826166666666667	up	1.38164663861203	1
vvi-miR396b	218.2306	23.6376	7.4250	250.2275	333.4012	130.1589	83.0977333333333	237.9292	up	1.51765130813758	0.310327480919549
pta-miR482c	0.0000	0.0000	0.0000	0.0000	1.0502	0.0000	0	0.350066666666667	up	11.7734139796071	1
gma-miR162a	15.7626	2.1094	0.0000	25.3785	31.1832	14.2651	5.95733333333333	23.6089333333333	up	1.98659427094413	0.104727263082314
gma-miR1511	562.6980	111.3636	106.6332	910.0690	801.7949	184.8014	260.2316	632.221766666667	up	1.28063454684703	0.739841440411015
gma-miR1514a-3p	0.8832	0.0000	0.0000	0.0000	0.0000	0.0000	0.2944	0	down	11.523561956057	1
gma-miR1527	3.6009	0.9927	0.0000	4.5065	5.9781	2.0148	1.5312	4.16646666666667	up	1.44416170309299	1
vvi-miR845a	0.7474	0.0000	0.0000	0.0000	0.0000	0.0000	0.249133333333333	0	down	11.2827023476596	0.999999999999999
vvi-miR845c	0.7474	0.0000	0.0000	1.7393	1.3734	0.0000	0.249133333333333	1.03756666666667	up	2.05821406866694	1
mtr-miR1510b-3p	12.4334	4.1567	3.0574	41.9022	32.5565	19.4231	6.54916666666667	31.2939333333333	up	2.25649975116421	0.101420821462408
mtr-miR1510a-5p	505.5585	208.4578	160.3554	1271.3770	1057.8845	954.9552	291.457233333333	1094.7389	up	1.90923071004875	0.27613517611361
mtr-miR1510a-3p	2.9895	0.0000	0.0000	3.6368	4.1201	2.0954	0.9965	3.2841	up	1.72055634730037	0.741496943084952
mtr-miR2087-5p	0.7474	0.0000	0.0000	1.4231	2.2620	1.2089	0.249133333333333	1.63133333333333	up	2.71106163258601	0.636331749964005
gma-miR1507b	3.8727	0.6825	0.0000	3.9530	4.5240	1.8537	1.5184	3.44356666666667	up	1.18135171007596	1
gma-miR1510b-3p	18.4124	0.9306	0.0000	18.8165	30.3753	8.6235	6.44766666666667	19.2717666666667	up	1.57963976529168	0.382957122666991
mtr-miR2119	0.0000	0.0000	0.0000	0.0000	0.8079	0.8059	0	0.537933333333333	up	12.393211673747	1
mtr-miR2199	1.3588	0.0000	0.0000	1.5022	1.8581	1.3701	0.452933333333333	1.5768	up	1.79962905888544	0.636296105055798
osa-miR2118e	0.8832	0.0000	0.0000	1.5022	1.7773	1.5313	0.2944	1.6036	up	2.44546474609376	0.636316766772304
bdi-miR1127	0.0000	0.0000	0.6240	1.1069	1.0502	0.9671	0.208	1.0414	up	2.3238688783618	1
mtr-miR2586a	9.9196	2.9159	1.6847	12.5707	14.0567	10.5578	4.84006666666667	12.3950666666667	up	1.35666720664941	1
mtr-miR2587a	4.2124	1.0547	0.0000	4.9808	7.7554	3.8685	1.7557	5.5349	up	1.65651090209943	0.637436133913621
mtr-miR2588a	1.3588	0.0000	0.0000	1.9765	1.2926	0.0000	0.452933333333333	1.0897	up	1.26656038571104	0.999999999999999
mtr-miR2591	1.2909	0.0000	0.0000	3.2415	2.6659	2.6596	0.4303	2.85566666666667	up	2.73041284236704	0.23818415616875
mtr-miR2598	0.6794	0.0000	0.0000	0.0000	0.0000	0.0000	0.226466666666667	0	down	11.145083002158	0.999999999999998
mtr-miR2603	35.6697	15.4482	9.5465	52.4173	59.2157	29.0137	20.2214666666667	46.8822333333333	up	1.21315365722535	0.384737947242848
mtr-miR2604	0.0000	0.0000	0.0000	0.9487	0.0000	0.8059	0	0.584866666666667	up	12.5138920524976	1
mtr-miR2610a	0.7474	0.0000	0.0000	0.0000	0.0000	0.0000	0.249133333333333	0	down	11.2827023476596	0.999999999999998
mtr-miR2614	9.1722	3.4743	1.6223	17.7096	15.7531	8.1400	4.75626666666667	13.8675666666667	up	1.54381315190771	1
mtr-miR2616	0.6794	0.0000	0.0000	1.3440	0.9694	0.0000	0.226466666666667	0.771133333333333	up	1.76768161437952	1
mtr-miR2619a	1.5627	0.0000	0.0000	2.3718	2.8275	1.7731	0.5209	2.32413333333333	up	2.15761449496672	0.700417865151969
mtr-miR2629a	1.8344	0.0000	0.0000	1.9765	2.1004	0.8059	0.611466666666667	1.6276	up	1.41240042621407	1
mtr-miR2630a	0.0000	0.0000	0.0000	0.0000	1.3734	0.0000	0	0.4578	up	12.1605017475557	0.999999999999998
mtr-miR2632a	0.9512	0.0000	0.0000	1.1069	2.1004	0.0000	0.317066666666667	1.0691	up	1.75353868471211	0.999999999999999
mtr-miR2647a	0.8153	0.0000	0.0000	1.5812	1.9388	0.8059	0.271766666666667	1.44196666666667	up	2.40759739538478	0.999999999999999
mtr-miR2651	2.1062	0.0000	0.0000	2.2137	2.7467	1.2089	0.702066666666667	2.05643333333333	up	1.55046436524573	1
mtr-miR2652a	1.8344	0.0000	0.0000	2.1346	5.3318	1.7731	0.611466666666667	3.07983333333333	up	2.33250652158422	0.478880616193782
mtr-miR2655a	1.9703	0.9927	0.0000	2.7671	2.7467	1.6925	0.987666666666667	2.4021	up	1.28220008645679	1
mtr-miR2655b	1.4947	0.0000	0.0000	2.1346	1.8581	0.8865	0.498233333333333	1.6264	up	1.70678866966576	1
mtr-miR2661	29.0793	19.3568	1.8095	22.5323	83.9360	9.2683	16.7485333333333	38.5788666666667	up	1.20377599738026	0.771095239132236
mtr-miR2666	0.0000	0.0000	0.0000	0.0000	0.8886	0.0000	0	0.2962	up	11.5323559252888	1
mtr-miR2669a	0.0000	0.0000	0.0000	0.9487	0.8079	0.0000	0	0.585533333333333	up	12.5155355876957	1
mtr-miR2670a	3.0574	0.0000	0.0000	8.4595	8.8864	2.5790	1.01913333333333	6.64163333333333	up	2.70419526592334	0.0835129228287937
mtr-miR2671a	0.0000	0.0000	0.0000	0.0000	0.9694	0.0000	0	0.323133333333333	up	11.6579138664452	1
mtr-miR2678	0.0000	0.0000	0.0000	0.0000	0.8079	0.0000	0	0.2693	up	11.3949985145017	1
aqc-miR159	11.8220	2.6057	1.5599	15.0216	17.6112	8.7847	5.3292	13.8058333333333	up	1.37328709075836	1
aqc-miR166c	378.2347	160.4380	63.8926	737.4002	648.9489	364.5255	200.8551	583.624866666667	up	1.53888625992191	0.59204447381334
aqc-miR167	1.8344	0.0000	0.0000	0.0000	0.0000	0.0000	0.611466666666667	0	down	12.5780581388596	0.509747406488668
aqc-miR398b	28.1281	141.0813	6.7387	141.0445	313.5280	107.2703	58.6493666666667	187.280933333333	up	1.67501659508833	0.846360721376919
zma-miR399j-5p	0.0000	0.0000	0.0000	1.1859	3.7161	0.0000	0	1.634	up	13.996120363033	0.267447070212987
crt-miR166b	1.9024	0.0000	0.0000	3.4787	3.5546	3.0626	0.634133333333333	3.3653	up	2.40787700028486	0.315117001704097
gra-miR482	2.1742	0.6825	0.0000	4.1902	3.8777	4.6744	0.952233333333333	4.24743333333333	up	2.15720426635635	0.576672784160621
aly-miR156a-5p	59.4495	9.3062	2.8078	65.2252	108.6563	77.6118	23.8545	83.8311	up	1.81322411289408	0.106215210131669
aly-miR156a-3p	0.0000	0.0000	0.0000	1.1069	0.0000	0.8059	0	0.6376	up	12.6384359139905	0.999999999999999
aly-miR156e-3p	2.7856	0.0000	0.0000	4.9808	7.8362	7.7370	0.928533333333333	6.85133333333333	up	2.88335916991911	0.0616318271566431
aly-miR159c-3p	13.3846	3.1641	0.8735	13.9147	21.0850	6.2863	5.8074	13.762	up	1.24472583684514	1
aly-miR319c-3p	4.7560	1.1167	0.6240	9.0920	8.3209	5.5610	2.16556666666667	7.65796666666667	up	1.82221679423451	0.558773935661308
aly-miR160a-5p	0.0000	0.0000	0.0000	0.9487	0.0000	0.0000	0	0.316233333333333	up	11.6267737311063	1
aly-miR164a-5p	96.6819	36.2319	28.5146	145.3928	122.0667	69.7136	53.8094666666667	112.391033333333	up	1.06259502784453	0.0957262768532954
aly-miR165a-3p	947.5910	386.0812	170.3386	2170.7728	1156.8466	3188.5300	501.336933333333	2172.0498	up	2.11520475509461	0.139328152936082
aly-miR165b-5p	0.0000	0.0000	0.0000	0.9487	0.0000	0.0000	0	0.316233333333333	up	11.6267737311063	1
aly-miR165b-3p	4.3483	1.4890	0.8111	7.5108	6.6244	9.1071	2.21613333333333	7.74743333333333	up	1.80567375194203	0.712773503238944
aly-miR166a-3p	5435.9941	2672.3544	1270.8634	11734.7595	9847.8989	12162.8039	3126.40396666667	11248.4874333333	up	1.84715490954755	0.248853167797255
aly-miR166f-5p	2.7856	0.6825	0.0000	4.4274	3.9585	1.2089	1.15603333333333	3.19826666666667	up	1.46810723613515	1
aly-miR166g-5p	1.9024	0.0000	0.0000	3.6368	2.3428	1.3701	0.634133333333333	2.4499	up	1.94986474303915	0.700837441654075
aly-miR167c-5p	2.4459	0.0000	0.0000	0.0000	1.0502	0.0000	0.8153	0.350066666666667	down	1.21970132007209	0.510051702305316
aly-miR167d-3p	0.0000	0.0000	0.0000	1.5022	1.6157	0.0000	0	1.0393	up	13.3433245362361	0.509061991231375
aly-miR168a-5p	132.0798	68.3692	48.4810	341.7008	282.2641	238.7992	82.9766666666667	287.588033333333	up	1.79322603820678	0.660805944921411
aly-miR170-5p	1.2909	0.0000	0.0000	1.4231	2.5851	0.0000	0.4303	1.33606666666667	up	1.63457725138749	1
aly-miR171c-5p	0.8153	0.0000	0.0000	2.3718	1.9388	2.0148	0.271766666666667	2.10846666666667	up	2.9557537944234	0.393140081510861
aly-miR390a-5p	51.0247	19.4188	7.3626	118.7493	71.8990	57.4633	25.9353666666667	82.7038666666667	up	1.6730340152695	0.354629877495327
aly-miR390a-3p	0.8832	0.0000	0.0000	1.3440	0.9694	0.0000	0.2944	0.771133333333333	up	1.38920266048055	1
aly-miR393a-5p	0.0000	0.0000	0.0000	0.9487	1.4541	0.0000	0	0.800933333333333	up	12.9674664478053	1
aly-miR396a-3p	51.0247	8.0653	2.8702	51.1523	72.3837	22.0021	20.6534	48.5127	up	1.23198317546524	0.844345972039003
aly-miR396b-5p	958.5297	170.1785	59.3377	1025.1025	1447.4316	563.1084	396.0153	1011.88083333333	up	1.35341132263011	0.509224035910857
aly-miR396b-3p	0.8832	0.8065	0.0000	1.6603	1.6157	0.8865	0.563233333333333	1.3875	up	1.30068314812128	1
aly-miR399b-3p	3.8048	2.5437	0.0000	7.1155	14.6222	3.7073	2.11616666666667	8.48166666666667	up	2.00289452867943	0.481333886054257
aly-miR399c-5p	0.0000	0.0000	0.0000	0.0000	1.2118	0.0000	0	0.403933333333333	up	11.9799014895058	0.999999999999999
aly-miR2111a-5p	0.0000	0.0000	0.0000	0.0000	1.7773	0.0000	0	0.592433333333333	up	12.532437100984	1
ahy-miR156a	12.9770	1.2408	0.0000	17.8677	24.7203	15.9576	4.73926666666667	19.5152	up	2.04186250299583	0.0747206064587939
ahy-miR156b-5p	4.7560	0.6204	0.0000	8.2223	8.7248	5.0774	1.79213333333333	7.3415	up	2.03439688485057	0.282116714425816
ahy-miR159	2936.5334	773.5893	287.2670	4112.1901	5199.6699	2610.5923	1332.46323333333	3974.15076666667	up	1.5765508796567	0.18521057812185
ahy-miR160-5p	22.7607	8.8098	5.0540	70.3641	44.4320	42.6341	12.2081666666667	52.4767333333333	up	2.10383135207544	0.0788295003082438
ahy-miR167-5p	180.0471	32.6956	14.5381	341.4637	235.9741	85.6711	75.7602666666667	221.0363	up	1.54477000367992	0.441689392899804
ahy-miR394	43.5510	5.5216	2.4334	43.5625	50.4909	23.0498	17.1686666666667	39.0344	up	1.18496809133633	0.839919785005764
ahy-miR398	21.4018	30.2760	1.3103	38.0283	84.9054	45.1325	17.6627	56.0220666666667	up	1.66528930902306	0.886155803830242
ahy-miR408-3p	15.2870	31.8891	2.6830	55.5007	110.1913	32.0763	16.6197	65.9227666666667	up	1.98788245080827	0.808991547995401
gso-miR2218	1.2230	0.0000	0.6863	1.1859	2.1812	1.6119	0.636433333333333	1.65966666666667	up	1.38281221045791	1
pab-miR396a	36.1453	4.4049	0.7487	33.7590	41.9276	15.0710	13.7663	30.2525333333333	up	1.13591510294988	0.790897070397513
pab-miR396b	3.6689	0.0000	0.0000	4.1112	5.4126	1.7731	1.22296666666667	3.76563333333333	up	1.62250744678891	0.538056551183041
pab-miR1863	0.8153	0.0000	0.0000	0.0000	0.0000	0.0000	0.271766666666667	0	down	11.408152798958	1
gma-miR482b-3p	0.6794	0.9306	0.0000	1.9765	0.9694	1.2895	0.536666666666667	1.4118	up	1.39543753877727	1
gma-miR4388	0.8153	0.0000	0.0000	0.0000	0.0000	0.0000	0.271766666666667	0	down	11.408152798958	1
gma-miR4403	5.2995	2.1094	1.4975	7.1945	7.1899	4.9162	2.9688	6.43353333333333	up	1.11573138543737	0.70391581010849
gma-miR4414-3p	1.8344	0.8065	0.0000	2.8462	2.5851	1.0477	0.8803	2.15966666666667	up	1.29474148418234	1
gma-miR396e	1.4268	0.0000	0.0000	0.0000	0.0000	0.0000	0.4756	0	down	12.2155329997457	1
csi-miR171b	2.1742	0.0000	0.0000	1.5812	2.3428	1.0477	0.724733333333333	1.65723333333333	up	1.1932545876908	1
csi-miR171a	26.3616	4.9012	3.1198	32.3359	27.7902	14.1845	11.4608666666667	24.7702	up	1.11188937295937	0.727375985498469
csi-miR482a-3p	0.0000	0.0000	0.0000	0.0000	0.8079	0.0000	0	0.2693	up	11.3949985145017	1
hvu-miR1436	1.5627	0.8065	0.8735	3.3206	2.5043	3.7879	1.0809	3.20426666666667	up	1.56776115964517	1
gma-miR164b	13.6564	5.3976	4.3677	22.1370	15.6724	10.4772	7.80723333333333	16.0955333333333	up	1.0437770890203	0.331969414983131
gma-miR168b	4.9598	2.7918	1.6223	18.8165	10.4213	10.9607	3.12463333333333	13.3995	up	2.1004203590366	0.486950408960745
gma-miR319f	615.7609	161.1205	105.9469	1081.8682	877.5715	659.8209	294.2761	873.086866666667	up	1.56895482334145	0.194454969687981
gma-miR408d	0.8153	2.1714	0.0000	4.5855	5.4126	2.3372	0.995566666666667	4.11176666666667	up	2.04616856496017	0.796646969722159
gma-miR2118a-3p	428.2402	116.5130	52.4119	454.1253	472.1905	420.0546	199.055033333333	448.790133333333	up	1.17287360651629	0.950178575217422
gma-miR482c-3p	3.8048	1.7992	0.9359	4.3483	6.4628	5.0774	2.17996666666667	5.29616666666667	up	1.28064244818866	0.999999999999999
rgl-miR5141	0.0000	0.0000	0.6240	1.2650	1.1310	0.0000	0.208	0.798666666666667	up	1.94100997392654	1
osa-miR5162	1.2909	0.0000	0.0000	0.0000	0.0000	0.0000	0.4303	0	down	12.0711271249483	1
bdi-miR166e-3p	20.2468	10.8572	6.8011	37.9492	35.3840	29.7391	12.6350333333333	34.3574333333333	up	1.44319279383644	0.893375336454106
cme-miR168	18.0726	6.8866	3.4941	48.7015	19.7924	18.2142	9.48443333333333	28.9027	up	1.60757078649903	0.82603569551936
ssp-miR1128	3.7368	1.5510	1.4975	7.1945	6.4628	7.7370	2.26176666666667	7.13143333333333	up	1.65674196783313	1
bdi-miR319b-5p	0.0000	0.0000	0.0000	0.9487	0.0000	0.0000	0	0.316233333333333	up	11.6267737311063	1
mtr-miR5205a	2.1742	0.6204	1.0607	4.4274	4.6856	2.9014	1.2851	4.0048	up	1.63984956910044	1
mtr-miR5205b	2.2421	1.3649	1.3103	6.7202	3.8777	6.2057	1.6391	5.6012	up	1.77283206835469	1
mtr-miR5205c	6.7263	4.8392	3.2445	11.3848	10.5021	9.4295	4.93666666666667	10.4388	up	1.08034673545498	0.43798699105601
mtr-miR5206a	1.0191	0.0000	0.0000	0.0000	0.0000	0.0000	0.3397	0	down	11.7300455028792	1
mtr-miR5208a	0.0000	0.0000	0.0000	0.8697	1.2118	0.0000	0	0.693833333333333	up	12.7603734373064	1
mtr-miR5211	2.0383	0.6204	0.0000	2.9253	2.5851	9.3489	0.886233333333333	4.9531	up	2.48257325224723	0.23311340881379
mtr-miR5213-3p	4.0765	0.0000	0.0000	3.0043	5.1703	1.7731	1.35883333333333	3.3159	up	1.28703198479362	1
mtr-miR5214-3p	44.9098	15.1380	4.9916	69.8107	69.7986	33.2046	21.6798	57.6046333333333	up	1.40983340948668	0.871128426535411
mtr-miR2586b	0.8153	0.0000	0.0000	1.3440	2.2620	1.6119	0.271766666666667	1.7393	up	2.6780663753314	0.636335835127752
mtr-miR5224b	0.0000	0.0000	0.0000	0.9487	0.8079	0.0000	0	0.585533333333333	up	12.5155355876957	0.999999999999999
mtr-miR2592ap	3.9407	1.6131	0.0000	3.8740	16.6418	3.6267	1.85126666666667	8.0475	up	2.12002794777067	0.431110309371122
mtr-miR5230	0.0000	0.0000	0.0000	1.2650	1.0502	0.0000	0	0.771733333333333	up	12.9138867058106	1
mtr-miR5236a	0.8153	0.0000	0.0000	1.1859	1.0502	0.0000	0.271766666666667	0.745366666666667	up	1.45558178785375	1
mtr-miR5245	1.9703	0.0000	0.0000	4.8227	6.2205	1.3701	0.656766666666667	4.13776666666667	up	2.65539948030352	0.209369456750217
mtr-miR5249	4.2804	1.4269	1.3103	5.6133	6.6244	5.1580	2.3392	5.79856666666667	up	1.30968111169139	0.83840424473772
mtr-miR2643b-5p	1.1550	0.0000	0.0000	2.1346	1.7773	2.3372	0.385	2.08303333333333	up	2.4357555750882	0.393839044842033
mtr-miR2111l	0.0000	0.0000	0.0000	0.0000	1.2118	0.0000	0	0.403933333333333	up	11.9799014895058	1
mtr-miR5266	0.0000	0.0000	0.0000	1.0278	0.8079	0.0000	0	0.6119	up	12.5790801838348	0.999999999999999
mtr-miR5267a	0.9512	0.0000	0.0000	2.0556	2.3428	1.4507	0.317066666666667	1.9497	up	2.62039403434156	0.635811862800839
mtr-miR5269a	1.2230	0.0000	0.0000	1.9765	1.7773	0.0000	0.407666666666667	1.25126666666667	up	1.61792738250631	1
mtr-miR5269b	3.4651	0.0000	0.6863	4.8227	4.6856	1.8537	1.3838	3.78733333333333	up	1.45254695629131	1
mtr-miR5272a	0.0000	0.0000	0.0000	0.0000	0.8886	0.8865	0	0.5917	up	12.53065017975	0.999999999999998
mtr-miR5273	2.3780	1.8612	0.9359	5.3761	4.6048	2.5790	1.72503333333333	4.18663333333333	up	1.27916633213804	0.804726676585835
mtr-miR2590g	0.8153	0.0000	0.0000	0.0000	0.0000	0.0000	0.271766666666667	0	down	11.408152798958	1
mtr-miR2629h	5.2316	1.2408	0.0000	7.1155	11.9562	4.3521	2.15746666666667	7.80793333333333	up	1.85560246513378	0.32225581419591
mtr-miR5276	1.1550	0.9306	1.2479	0.0000	0.0000	0.0000	1.11116666666667	0	down	13.4397876059432	0.074239915109535
mtr-miR5280	0.0000	0.0000	0.0000	0.9487	0.0000	0.0000	0	0.316233333333333	up	11.6267737311063	1
mtr-miR5281a	9.5799	5.0253	2.6206	28.5410	23.7509	25.9512	5.74193333333333	26.0810333333333	up	2.18339254507652	0.176514931304224
mtr-miR5281b	31.8649	19.5429	14.5381	120.0934	87.9753	125.3233	21.9819666666667	111.130666666667	up	2.33786461426172	0.194713539986218
mtr-miR2600b	0.6794	0.0000	0.0000	1.1859	1.2926	0.0000	0.226466666666667	0.826166666666667	up	1.86713413547849	1
mtr-miR2590h	1.9024	0.0000	0.0000	3.0834	3.1506	1.6925	0.634133333333333	2.64216666666667	up	2.05886335452438	0.700209885313394
mtr-miR5284a	12.5014	4.0327	2.7454	16.6028	21.0850	12.2502	6.4265	16.646	up	1.37307040618272	1
mtr-miR5284b	0.0000	0.0000	0.0000	0.9487	0.0000	0.0000	0	0.316233333333333	up	11.6267737311063	1
mtr-miR5285a	6.1148	3.1641	2.5582	9.1711	9.6942	5.0774	3.9457	7.9809	up	1.01627017819458	0.41853474894237
mtr-miR5286a	4.2124	2.1094	1.3103	8.4595	7.2707	4.5132	2.54403333333333	6.7478	up	1.40729964006735	1
mtr-miR5287a	64.6811	31.6409	21.2143	146.1834	136.6889	142.3285	39.1787666666667	141.7336	up	1.85503792261172	0.425307773930159
mtr-miR5287b	15.9664	8.3135	5.5532	31.2290	32.7181	30.3032	9.94436666666667	31.4167666666667	up	1.6595833125435	0.833043983469539
mtr-miR5289a	0.0000	0.0000	0.0000	0.7906	0.0000	0.0000	0	0.263533333333333	up	11.3637697390985	1
mtr-miR5286b	4.8918	1.9853	0.9359	7.1155	6.5436	4.8356	2.60433333333333	6.1649	up	1.24316337958987	0.999999999999997
mtr-miR5290	3.1253	1.1167	0.0000	3.9530	6.0589	2.3372	1.414	4.11636666666667	up	1.54158937632681	0.999999999999999
mtr-miR5291a	0.0000	0.0000	0.0000	0.7906	0.8079	0.8059	0	0.801466666666667	up	12.9684268040005	1
mtr-miR5292a	0.9512	0.0000	0.0000	1.0278	2.2620	1.2089	0.317066666666667	1.49956666666667	up	2.24168754246579	0.999999999999999
mtr-miR5292b	0.9512	0.0000	0.0000	1.8975	2.6659	1.2895	0.317066666666667	1.95096666666667	up	2.62133100944805	0.635938684762242
mtr-miR5295a	9.1722	3.4123	2.1838	11.1476	13.2488	6.9311	4.92276666666667	10.4425	up	1.08492587923792	0.558058406671004
mtr-miR5296	1.1550	0.0000	0.0000	1.2650	1.3734	0.0000	0.385	0.879466666666667	up	1.19177045224669	1
gma-miR166i-5p	6.4545	1.3029	0.0000	7.5108	5.4126	6.3669	2.5858	6.4301	up	1.31423048082503	0.687011780638565
gma-miR171k-5p	2.0383	0.0000	0.0000	3.0043	3.3930	1.0477	0.679433333333333	2.48166666666667	up	1.86890544369226	0.701046477983134
gma-miR396h	3.8048	0.8686	0.0000	1.1069	0.8079	0.0000	1.5578	0.638266666666667	down	1.28727881272603	0.0729280335376878
aau-miR319	684.1788	125.1367	36.0020	886.7461	950.6823	358.7227	281.7725	732.050366666667	up	1.37741209591743	0.508144747345224
aau-miR162	134.7975	20.8458	7.7994	190.3784	171.5074	86.1547	54.4809	149.346833333333	up	1.45484420654119	0.369389866982963
aau-miR168	2.3780	0.8065	0.7487	4.5855	4.1201	5.3192	1.31106666666667	4.67493333333333	up	1.83420474437565	0.806243958324054
mtr-miR2592bm-5p	1.2909	0.7445	0.0000	1.8975	2.2620	3.5461	0.678466666666667	2.56853333333333	up	1.92059495416418	0.74331247778962
mtr-miR5561-5p	0.0000	0.0000	0.0000	0.0000	0.9694	0.0000	0	0.323133333333333	up	11.6579138664452	1
mtr-miR5561-3p	0.7474	0.0000	0.0000	0.0000	0.0000	0.0000	0.249133333333333	0	down	11.2827023476596	1
mtr-miR2111a-3p	0.0000	0.0000	0.0000	0.0000	2.1004	0.0000	0	0.700133333333333	up	12.7734139796071	1
mtr-miR5743a	6.1148	0.0000	0.0000	2.7671	6.1397	3.9491	2.03826666666667	4.2853	up	1.07205339447638	0.811795795395333
mtr-miR5745a	0.7474	0.0000	0.0000	0.0000	0.0000	0.0000	0.249133333333333	0	down	11.2827023476596	1
mtr-miR5754	1.2230	0.0000	0.0000	3.4787	5.0895	2.4178	0.407666666666667	3.662	up	3.16716988799111	0.142544012927039
mtr-miR5225b	0.0000	0.0000	0.0000	0.9487	0.0000	0.0000	0	0.316233333333333	up	11.6267737311063	1
mtr-miR5037a	3.3971	0.0000	0.0000	4.1112	2.0196	1.6119	1.13236666666667	2.5809	up	1.18853305705077	1
gma-miR5559	1.2909	0.0000	0.0000	1.5812	1.2926	0.0000	0.4303	0.957933333333333	up	1.1545824158672	1
gma-miR5770b	0.0000	0.0000	0.0000	0.0000	0.8079	0.0000	0	0.2693	up	11.3949985145017	1
gma-miR169o	0.7474	0.0000	0.0000	0.0000	0.0000	0.0000	0.249133333333333	0	down	11.2827023476596	1
stu-miR482b-3p	0.8832	0.0000	0.0000	1.5022	1.3734	2.0954	0.2944	1.657	up	2.4927240260518	0.636966371851161
nta-miR482a	260.2189	69.7341	32.3207	219.7891	384.1345	223.4864	120.7579	275.803333333333	up	1.19152231975961	0.929483248776134
bna-miR167d	30.1664	4.9012	1.7471	35.9727	40.7158	11.2025	12.2715666666667	29.297	up	1.2554334964364	0.898912977052128
cca-miR408	0.0000	1.6131	0.0000	1.3440	1.9388	0.0000	0.5377	1.09426666666667	up	1.02509098096284	0.645820735680448
cca-miR396c	0.0000	0.0000	0.0000	0.7906	0.8079	0.0000	0	0.532833333333333	up	12.3794686229467	0.999999999999999
cca-miR6118-3p	1.2230	0.6204	0.0000	1.0278	1.4541	1.2089	0.614466666666667	1.23026666666667	up	1.00156440596645	1
lus-miR159b	8.7646	2.6057	0.9359	22.3742	22.7815	12.0085	4.10206666666667	19.0547333333333	up	2.21572657434357	0.132872154550769
ppe-miR482b-5p	0.0000	0.0000	0.0000	1.1069	0.0000	0.0000	0	0.368966666666667	up	11.8492747703057	0.999999999999999
ppe-miR482e	0.6794	0.0000	0.0000	1.5022	1.0502	1.0477	0.226466666666667	1.20003333333333	up	2.40570385753085	0.999999999999999
ppe-miR398b	0.0000	0.0000	0.0000	0.0000	1.3734	0.0000	0	0.4578	up	12.1605017475557	0.999999999999999
gma-miR166u	63.7299	20.7217	7.4874	107.7599	95.5691	67.5376	30.6463333333333	90.2888666666667	up	1.55883362928611	0.373200568995628
gma-miR390e	0.0000	0.0000	0.0000	0.8697	0.0000	0.0000	0	0.2899	up	11.5013396180614	1
pde-miR159	0.0000	0.0000	0.0000	0.0000	1.2118	0.0000	0	0.403933333333333	up	11.9799014895058	0.999999999999998
htu-miR171a	0.0000	0.0000	0.0000	0.8697	1.1310	0.0000	0	0.6669	up	12.7032547337481	0.999999999999999
cme-miR166i	9.8516	5.4596	1.9342	21.1092	18.2575	17.4082	5.74846666666667	18.9249666666667	up	1.71904166794715	0.665374806714485
cme-miR156e	12.8411	1.9233	0.6863	15.4169	14.4606	7.1728	5.15023333333333	12.3501	up	1.26181302275224	1
cme-miR159b	0.8153	0.0000	0.0000	0.0000	0.0000	0.0000	0.271766666666667	0	down	11.408152798958	1
mtr-miR397-3p	0.0000	0.0000	0.0000	0.0000	2.0196	0.0000	0	0.6732	up	12.7168194613299	1
mtr-miR7696a-3p	1.8344	0.0000	0.6863	7.9061	5.0895	4.9968	0.840233333333333	5.99746666666667	up	2.83549130820574	0.215354547483975
mtr-miR2592bo-5p	62.7107	37.5348	6.1147	62.6952	183.0597	61.4930	35.4534	102.415966666667	up	1.5304447548377	0.839338497660157
mtr-miR2592bp-3p	0.0000	0.0000	0.0000	0.0000	0.8886	0.0000	0	0.2962	up	11.5323559252888	1
ama-miR396-3p	0.7474	0.0000	0.0000	0.0000	0.0000	0.0000	0.249133333333333	0	down	11.2827023476596	1
bdi-miR397b-5p	0.0000	0.0000	0.0000	0.0000	1.2118	0.0000	0	0.403933333333333	up	11.9799014895058	0.999999999999999
bdi-miR5174e-3p.2	6.5225	3.4743	2.6830	13.1241	13.1680	10.9607	4.2266	12.4176	up	1.55481687583467	1
bdi-miR159b-3p.1	224.4813	22.4588	4.6796	352.4531	132.4072	49.4846	83.8732333333333	178.114966666667	up	1.08652637000209	0.821581221958636
bdi-miR5049-5p	3.9407	1.7992	2.0590	7.7480	6.4628	4.3521	2.59963333333333	6.18763333333333	up	1.25107955620953	0.709198124023335
bdi-miR5049-3p	0.8153	0.0000	0.0000	0.0000	0.0000	0.0000	0.271766666666667	0	down	11.408152798958	1
ptc-miR7832	0.0000	0.0000	0.0000	1.2650	0.0000	1.2895	0	0.8515	up	13.0557908145659	0.50918097942614
ppe-miR1511-3p	0.0000	0.0000	0.0000	1.2650	0.0000	0.8059	0	0.6903	up	12.7530077689452	0.999999999999998
cpa-miR8155	51.4323	8.4996	6.0523	133.4547	76.0190	24.0169	21.9947333333333	77.8302	up	1.8231719544624	0.354116612989352
lus-miR398f	0.0000	0.9306	0.0000	0.0000	0.0000	0.0000	0.3102	0	down	11.5989829710361	1
ath-miR8175	0.0000	0.0000	0.0000	0.9487	1.2118	0.0000	0	0.720166666666667	up	12.8141151097559	1
atr-miR166b	265.7902	123.4616	54.2837	414.0415	354.9709	277.0007	147.845166666667	348.671033333333	up	1.23777943396077	0.312965559649183
atr-miR171b	4.4162	1.6131	0.8735	9.4873	11.0676	4.4327	2.30093333333333	8.3292	up	1.85595875090914	0.853438234320572
atr-miR398	0.0000	0.0000	0.0000	0.0000	1.2926	0.0000	0	0.430866666666667	up	12.0730257755568	1
gra-miR167a	2.7177	0.0000	0.0000	2.3718	3.4738	1.2895	0.9059	2.37836666666667	up	1.39254744007843	0.701733298302279
sly-miR156e-3p	6.4545	2.0474	1.2479	11.5429	17.6112	13.8621	3.24993333333333	14.3387333333333	up	2.14143555449709	0.224170855235281
bdi-miR160f	22.8286	8.3755	5.1164	41.1116	24.3972	27.3213	12.1068333333333	30.9433666666667	up	1.3538086092091	0.940862571844944
bdi-miR845	0.7474	0.0000	0.0000	1.4231	1.9388	0.0000	0.249133333333333	1.12063333333333	up	2.16932434329492	1
bdi-miR2118a	0.9512	0.0000	0.0000	0.0000	1.0502	0.9671	0.317066666666667	0.672433333333333	up	1.08460502812175	1
bdi-miR5281a	17.5291	6.0180	4.1181	43.4044	45.4822	33.9300	9.22173333333333	40.9388666666667	up	2.15036131121686	0.0691723835294417
tae-miR1137b-5p	1.6306	0.0000	0.0000	0.0000	0.0000	0.0000	0.543533333333333	0	down	12.408152798958	1
tae-miR5049-3p	3.0574	2.4816	1.0607	12.2544	10.5021	13.9427	2.1999	12.2330666666667	up	2.47527626328648	0.204567137724931
gma-miR9726	0.0000	0.6204	0.0000	0.0000	0.0000	0.0000	0.2068	0	down	11.0140204703149	1
gma-miR9749	2.8536	1.1788	0.9359	4.5065	5.9781	6.7699	1.6561	5.7515	up	1.79614847273111	0.832442307336207
ata-miR166a-5p	0.0000	0.0000	0.0000	1.1859	0.0000	0.0000	0	0.3953	up	11.9487322398196	1
ata-miR2118c-3p	0.6794	1.0547	0.6240	2.6090	2.5851	1.6119	0.786033333333333	2.26866666666667	up	1.52918225128676	1
ata-miR395a-3p	2.6497	0.0000	0.0000	2.4509	2.4236	1.4507	0.883233333333333	2.1084	up	1.25528207143775	1
ata-miR396e-3p	1.9024	0.0000	0.0000	1.8184	1.9388	0.9671	0.634133333333333	1.57476666666667	up	1.31227996070525	1
ata-miR167b-5p	174.6796	31.2687	20.0288	175.3569	222.3214	77.0476	75.3257	158.241966666667	up	1.0709181815322	0.687208116188228
ata-miR398f-5p	0.0000	0.0000	0.0000	1.0278	1.2118	0.9671	0	1.0689	up	13.3838392688545	0.508492630809518
ata-miR398f-3p	0.0000	0.0000	0.0000	10.8313	1.0502	0.0000	0	3.9605	up	15.2733949568202	0.188451635082191
ata-miR408-3p	0.0000	1.0547	0.0000	1.8975	2.5851	0.8059	0.351566666666667	1.76283333333333	up	2.32602588700294	1
ata-miR167f-5p	10.8028	1.2408	0.8735	11.3848	11.4715	4.0297	4.3057	8.962	up	1.05757292337865	0.875176665553005
ata-miR167d-3p	0.0000	0.0000	0.0000	1.1069	1.7773	0.0000	0	0.9614	up	13.2309210881379	1
ata-miR166c-5p	3.1933	1.4890	0.0000	11.0685	5.3318	2.5790	1.56076666666667	6.32643333333333	up	2.01913750589914	0.509119998970828
ata-miR166c-3p	3.8048	1.3649	0.0000	13.5194	8.3209	7.7370	1.72323333333333	9.8591	up	2.51633789242236	0.0992616690691817
