# Supplementary material for: Identification of Drought-Responsive microRNAs from Roots and Leaves of Alfalfa by High-Throughput Sequencing
Source: Preprints.org preprint supplement (doi:10.20944/preprints201702.0085.v1), 2017-02-23
Supplement: Supplementary file 3 [file Table S2. Members and expression abundance of known miRNAs from roots of alfalfa treated with drought and irrigation.xls]

miRNA_ID	WR-1	WR-2	WR-3	DR-1	DR-2	DR-3	WR-1,WR-2,WR-3	DR-1,DR-2,DR-3	up/down	|log2(foldchange)|	P-value	Significance-Lable
mtr-miR1507-3p	18.9561	10.6201	23.5615	3.5629	2.6470	2.2796	17.7125666666667	2.82983333333333	down	2.64598429188238	0.00427709104146567	**
aqc-miR166c	91.2628	83.6253	193.6884	28.5717	32.8545	23.5036	122.858833333333	28.3099333333333	down	2.11762133167908	2.86307717629171e-05	**
aly-miR166a-3p	1573.0948	1536.3520	2637.5360	737.1082	728.4047	554.1814	1915.66093333333	673.231433333333	down	1.5086677875305	0.000810091754185076	**
ahy-miR159	998.8100	544.2320	1100.1301	264.8876	218.7705	181.9759	881.057366666667	221.878	down	1.98946933151543	4.00995977130683e-06	**
ahy-miR3512	6.5141	11.5740	6.6912	0.0000	1.0900	0.0000	8.25976666666667	0.363333333333333	down	4.50673539269084	0.00502924735772265	**
gma-miR319d	16.9367	4.4515	36.3032	44.3992	67.5775	19.7304	19.2304666666667	43.9023666666667	up	1.19090494088138	0.000156423511257261	**
aau-miR160	37.4562	22.7028	40.5030	7.9480	7.7076	8.0179	33.554	7.89116666666667	down	2.08817424569867	0.00710393803018658	**
aau-miR396	92.0445	46.1688	184.6482	20.2811	19.4636	11.4767	107.6205	17.0738	down	2.65609682454028	9.49233711913535e-05	**
nta-miR482a	123.3774	89.4759	152.1176	43.8510	33.1659	36.2380	121.656966666667	37.7516333333333	down	1.68820796889946	0.0048309385315511	**
cpa-miR166e	29.8347	30.5884	51.1804	4.9332	4.9048	3.5373	37.2011666666667	4.45843333333333	down	3.06073911649138	1.41710951268652e-06	**
atr-miR166b	176.5326	160.5096	263.4475	46.3176	53.0966	37.4171	200.163233333333	45.6104333333333	down	2.13374121729542	1.06079940156564e-09	**
aqc-miR166a	11.8557	7.8856	13.9518	2.0555	1.5571	2.2010	11.2310333333333	1.93786666666667	down	2.53494945601657	0.0497497866755939	*
aly-miR157a-3p	1.5634	0.6995	1.7084	4.0425	2.9585	2.1224	1.32376666666667	3.04113333333333	up	1.19996022192587	0.0170528160148212	*
aly-miR171b-3p	2.1497	1.2719	5.0540	0.0000	0.0000	0.0000	2.8252	0	down	14.786065381164	0.0361322155757664	*
aly-miR396b-5p	36.7396	24.8014	115.6720	13.7034	12.3010	11.5553	59.071	12.5199	down	2.23822699613402	0.0428720728949376	*
ahy-miR398	1366.3366	8.5215	41.0725	8.9758	8.1747	18.1583	471.976866666667	11.7696	down	5.3255789544079	0.0305465776700482	*
gma-miR159d	2.2799	1.8442	4.0574	0.0000	0.0000	0.0000	2.72716666666667	0	down	14.7351152506226	0.0356504293020643	*
hbr-miR166a	23.5160	21.4946	40.0759	7.8110	8.8754	5.6597	28.3621666666667	7.4487	down	1.92890718509212	0.0307566972177011	*
bdi-miR159b-3p.1	25.4702	12.5915	54.1701	6.7147	5.4498	5.2667	30.7439333333333	5.8104	down	2.40359236282213	0.0122483488103915	*
osa-miR166e-3p	3.3222	2.5437	5.5523	0.8222	0.0000	0.0000	3.80606666666667	0.274066666666667	down	3.79570205563575	0.123692951447786
osa-miR396a-3p	0.0000	0.0000	1.0677	0.0000	0.0000	0.0000	0.3559	0	down	11.7972562175098	1
mtr-miR399b	1.9542	1.7170	4.5557	1.2333	0.8564	1.1791	2.7423	1.0896	down	1.33158779811673	1
zma-miR399e-5p	0.9120	0.8903	0.0000	0.0000	0.0000	0.0000	0.600766666666667	0	down	12.5525890522932	0.999999999999997
ath-miR829-3p.1	1.1074	0.0000	1.3525	0.0000	0.0000	0.0000	0.819966666666667	0	down	13.0013495470609	0.506562275003872
mtr-miR166d	1.0423	1.7170	1.9219	0.0000	0.0000	0.0000	1.5604	0	down	13.9296282830246	0.2583844548733
mtr-miR166e-5p	32.8963	43.0527	44.3469	14.8682	13.7802	15.4856	40.0986333333333	14.7113333333333	down	1.4466250582826	0.30477096911126
mtr-miR156g-3p	0.0000	0.0000	0.9966	1.6444	0.7785	0.0000	0.3322	0.807633333333333	up	1.28164838274091	0.260088217993697
pta-miR159a	4.7553	1.5898	8.1148	1.6444	1.5571	0.7861	4.81996666666667	1.3292	down	1.85846497113403	0.626544196584468
pta-miR319	0.0000	0.6359	1.7796	0.0000	0.8564	0.0000	0.805166666666667	0.285466666666667	down	1.49596515193393	0.999999999999998
bna-miR169m	0.0000	0.0000	2.4202	0.0000	0.0000	0.0000	0.806733333333333	0	down	12.9778761523966	0.999999999999999
vvi-miR396b	11.2043	4.8331	35.8049	6.9202	7.1626	4.5592	17.2807666666667	6.214	down	1.47557307796963	0.798093901819031
gma-miR1507a	3.9736	2.1622	6.5488	1.6444	0.0000	1.0219	4.2282	0.888766666666667	down	2.25016700555472	0.410328129634175
gma-miR1509a	0.0000	0.0000	0.7830	0.0000	0.0000	0.0000	0.261	0	down	11.3498340914572	1
gma-miR1511	361.0777	363.2453	560.0662	184.3798	115.3801	130.5667	428.129733333333	143.4422	down	1.57757851287877	0.0508987176858536
gma-miR1527	0.7817	0.8903	1.5660	0.0000	0.0000	0.0000	1.07933333333333	0	down	13.3978528644688	0.505780162606456
mtr-miR1507-5p	0.9771	0.0000	0.9966	0.8222	0.0000	0.0000	0.6579	0.274066666666667	down	1.26334144155197	1
mtr-miR1510a-5p	99.2100	58.6331	189.3462	46.3176	44.6105	36.9454	115.729766666667	42.6245	down	1.44100516939904	0.287485520054395
gma-miR1507b	0.7817	0.0000	2.5626	0.0000	0.0000	0.0000	1.11476666666667	0	down	13.4444541488246	0.507023048926781
gma-miR1510b-3p	1.6937	0.6995	2.9897	0.7537	0.0000	1.1005	1.7943	0.618066666666667	down	1.53758675805748	1
mtr-miR2119	0.8468	0.0000	2.2067	0.8222	0.0000	0.0000	1.01783333333333	0.274066666666667	down	1.89290256816667	0.999999999999998
mtr-miR2118	182.8513	152.1789	212.1247	75.2319	106.2711	65.0082	182.384966666667	82.1704	down	1.15029612343064	0.642708207628689
mtr-miR2585a	1.8891	2.3530	4.4845	0.9592	1.8685	0.8647	2.90886666666667	1.2308	down	1.24086082054952	1
mtr-miR2586a	2.2148	1.9078	3.7015	1.5074	0.0000	1.1005	2.60803333333333	0.8693	down	1.58503625907907	1
mtr-miR2587a	0.9120	0.6995	1.1389	0.0000	0.0000	0.0000	0.9168	0	down	13.1623913287569	0.505915379462458
mtr-miR2603	11.9860	10.3021	17.8669	6.9202	6.1505	5.7383	13.385	6.26966666666667	down	1.09415649117853	1
mtr-miR2604	0.7166	0.0000	0.9966	0.0000	0.0000	0.0000	0.571066666666667	0	down	12.4794434611699	1
mtr-miR2614	2.9314	2.7345	5.0540	1.7814	1.6349	1.3363	3.5733	1.5842	down	1.17350255953965	1
mtr-miR2592a.2-3p	1.1725	0.0000	1.4237	0.0000	0.0000	0.0000	0.8654	0	down	13.0791514054219	0.506549053911603
mtr-miR2651	0.0000	0.0000	1.4948	0.0000	0.0000	0.0000	0.498266666666667	0	down	12.2827023476596	0.999999999999998
mtr-miR2655a	0.0000	0.0000	0.7118	0.0000	0.0000	0.0000	0.237266666666667	0	down	11.2122937167886	1
mtr-miR2661	1.2377	0.0000	0.0000	0.0000	2.8806	0.8647	0.412566666666667	1.24843333333333	up	1.59741961456378	0.256351793904505
mtr-miR2670a	0.7817	0.0000	1.1389	0.9592	0.0000	0.0000	0.6402	0.319733333333333	down	1.00165351885252	1
mtr-miR2675	0.0000	1.3355	1.7796	0.0000	0.0000	0.0000	1.03836666666667	0	down	13.3420283557817	0.50660955036875
aqc-miR159	1.4331	1.5262	2.2778	0.0000	0.0000	0.0000	1.7457	0	down	14.0915180314725	0.132819271901361
aqc-miR398b	44.6869	10.6837	12.5994	7.6739	7.7854	4.7950	22.6566666666667	6.75143333333333	down	1.74666989728084	0.345040380265562
ctr-miR171	13.1585	9.9206	25.6258	7.6739	5.6834	3.1443	16.2349666666667	5.50053333333333	down	1.56146100784388	0.401026132610903
crt-miR166b	0.0000	0.0000	1.2101	0.0000	0.0000	0.0000	0.403366666666667	0	down	11.9778761523966	0.999999999999999
gra-miR482	1.0423	0.7631	1.9931	0.0000	0.0000	0.0000	1.26616666666667	0	down	13.628179700072	0.25840915645005
aly-miR156a-5p	3.9736	2.4165	7.3318	1.9185	1.7128	1.2577	4.57396666666667	1.62966666666667	down	1.48886894734902	0.812726044699065
aly-miR159b-3p	8.9243	5.1511	18.2940	6.7147	4.4377	4.0090	10.7898	5.0538	down	1.09422764619359	1
aly-miR159c-3p	0.0000	0.0000	1.0677	0.0000	0.0000	0.0000	0.3559	0	down	11.7972562175098	1
aly-miR164c-5p	4.8204	3.2433	11.8875	3.0148	4.5934	2.2796	6.6504	3.29593333333333	down	1.01275405515205	1
aly-miR165a-3p	216.1385	223.7214	340.1826	119.2885	126.5911	94.6432	260.014166666667	113.5076	down	1.19580133184546	0.474248147209601
aly-miR165b-3p	1.3028	0.8903	2.9185	0.0000	0.0000	0.0000	1.70386666666667	0	down	14.0565248237605	0.25806510255705
aly-miR166a-5p	48.9862	51.1291	54.0277	27.2699	23.9013	23.4250	51.381	24.8654	down	1.04709532948778	1
aly-miR166f-5p	1.5634	2.3530	3.7727	1.1648	0.8564	0.0000	2.56303333333333	0.673733333333333	down	1.9276026572638	0.736159296882831
aly-miR166g-5p	0.0000	0.0000	0.7830	0.0000	0.0000	0.0000	0.261	0	down	11.3498340914572	1
aly-miR167a-5p	2.7359	1.0811	5.2675	1.9185	1.2457	1.1005	3.02816666666667	1.42156666666667	down	1.09096285359822	1
aly-miR167d-5p	0.8468	0.0000	2.4914	0.0000	0.0000	0.0000	1.11273333333333	0	down	13.4418202716248	0.506899503310968
aly-miR168a-5p	53.7415	67.5997	64.4204	29.1883	29.4289	23.4250	61.9205333333333	27.3474	down	1.17901421958446	0.613728703479964
aly-miR172a-3p	0.0000	0.0000	0.8542	0.0000	0.0000	0.0000	0.284733333333333	0	down	11.475395681921	1
aly-miR172c-3p	0.7817	0.0000	0.7830	0.0000	0.0000	0.0000	0.521566666666667	0	down	12.348635954516	1
aly-miR390a-3p	0.0000	0.0000	0.7830	0.0000	0.0000	0.0000	0.261	0	down	11.3498340914572	1
aly-miR398a-5p	0.0000	0.0000	0.7118	0.0000	0.0000	0.0000	0.237266666666667	0	down	11.2122937167886	1
aly-miR399a-3p	1.3680	1.0175	1.5660	0.0000	0.0000	0.0000	1.31716666666667	0	down	13.6851502869968	0.258271504909418
aly-miR399b-3p	0.9771	0.6995	1.3525	0.0000	0.0000	0.0000	1.0097	0	down	13.3016390855924	0.505809180302478
ahy-miR156a	0.9771	0.0000	1.7796	0.7537	0.0000	0.0000	0.9189	0.251233333333333	down	1.87087997570435	1
ahy-miR156b-5p	1.1725	0.0000	1.5660	0.6852	0.0000	0.0000	0.912833333333333	0.2284	down	1.9987888238319	1
ahy-miR160-5p	19.4121	13.7362	28.2596	10.9628	11.3667	7.5463	20.4693	9.9586	down	1.03944692186988	0.921249454307016
ahy-miR167-5p	12.8980	3.4340	28.4731	7.9480	4.2041	3.3015	14.9350333333333	5.1512	down	1.53571999738582	0.705136838681185
ahy-miR394	1.9542	1.3355	3.2744	0.7537	0.0000	0.0000	2.18803333333333	0.251233333333333	down	3.12253491979741	0.386873799247671
ahy-miR408-3p	11.6603	18.5057	26.8359	5.8925	5.2941	8.2538	19.0006333333333	6.48013333333333	down	1.55195210458915	0.402592445099814
ahy-miR3510	0.0000	0.0000	0.0000	0.0000	1.7128	0.8647	0	0.859166666666667	up	13.0687223064217	0.260555901395123
pab-miR3711	17.2624	47.5678	14.5213	4.6592	8.7197	3.5373	26.4505	5.63873333333333	down	2.22985197237685	0.111760992357528
pab-miR396a	5.1462	2.1622	16.7280	0.8907	1.5571	0.0000	8.01213333333333	0.815933333333333	down	3.29566324460243	0.062998626133027
gma-miR482b-3p	0.0000	0.0000	0.8542	0.0000	0.0000	0.0000	0.284733333333333	0	down	11.475395681921	1
gma-miR4403	1.4331	1.3355	2.1355	0.7537	0.8564	0.0000	1.6347	0.5367	down	1.60683810352462	1
csi-miR171b	5.7976	1.2083	5.3387	2.0555	2.0242	1.0219	4.11486666666667	1.70053333333333	down	1.27485839841017	0.999999999999998
csi-miR171a	40.9087	28.2990	103.8557	22.2681	21.0207	14.3065	57.6878	19.1984333333333	down	1.58727765914283	0.266683776284694
csi-miR472	1.6937	1.3355	2.5626	1.0963	0.9343	0.0000	1.86393333333333	0.676866666666667	down	1.4614066845219	1
hvu-miR1436	0.8468	0.6995	0.9966	0.0000	0.0000	0.0000	0.847633333333333	0	down	13.0492246077298	0.506006636604077
gma-miR319f	5.0810	13.9269	13.8095	0.6852	7.4740	2.4368	10.9391333333333	3.532	down	1.63094119522062	0.478148291382721
gma-miR408d	0.0000	1.2083	1.2101	0.0000	0.0000	0.0000	0.806133333333333	0	down	12.9768027629065	0.506747051645433
gma-miR2118a-3p	84.0973	57.7428	146.0671	41.7270	42.9756	30.1066	95.9690666666667	38.2697333333333	down	1.32636561429709	0.348147435840179
gma-miR482c-3p	1.1725	0.6359	1.5660	0.0000	0.0000	0.0000	1.1248	0	down	13.4573808790725	0.50572312153974
osa-miR5077	4.4296	7.7584	6.2641	2.4666	3.6592	1.3363	6.1507	2.48736666666667	down	1.30613141710274	0.855268535671705
osa-miR5083	2.0194	1.9078	1.5660	0.0000	0.0000	0.0000	1.83106666666667	0	down	14.1603966982207	0.133273851641963
bdi-miR166e-3p	4.2993	4.7059	7.6166	1.1648	2.4135	0.9433	5.5406	1.5072	down	1.87817134631101	0.504293947041017
bdi-miR159a-3p	5.6021	3.6884	6.4776	1.2333	0.8564	0.8647	5.25603333333333	0.9848	down	2.41607175820815	0.232523884490872
mtr-miR5204	0.0000	0.0000	0.7830	0.0000	0.0000	0.0000	0.261	0	down	11.3498340914572	1
mtr-miR5205a	0.6514	0.8903	0.9966	0.0000	0.0000	0.0000	0.8461	0	down	13.0466124692581	0.506082308392041
mtr-miR5205b	1.3028	1.2083	0.7118	0.0000	0.0000	0.8647	1.0743	0.288233333333333	down	1.89808783080009	1
mtr-miR5205c	2.2148	1.7170	2.2778	1.3018	0.9343	0.7861	2.06986666666667	1.0074	down	1.03890120140611	1
mtr-miR5206a	1.7588	0.0000	4.2710	0.0000	0.0000	0.0000	2.00993333333333	0	down	14.2948600295783	0.136934672931792
mtr-miR5213-3p	2.6056	2.5437	3.9862	1.2333	0.0000	0.0000	3.04516666666667	0.4111	down	2.88895991420194	0.30675898578787
mtr-miR5214-3p	21.8223	11.4468	13.9518	7.3313	5.8391	4.8737	15.7403	6.0147	down	1.38789835209288	0.522412110709748
mtr-miR2592ap	0.0000	0.0000	1.1389	0.0000	0.0000	0.0000	0.379633333333333	0	down	11.890390957009	0.999999999999998
mtr-miR4414b	1.9542	2.4801	1.3525	0.0000	0.8564	0.0000	1.92893333333333	0.285466666666667	down	2.75640908255079	0.38999584103107
mtr-miR5232	38.1076	32.4326	98.7305	21.0348	21.5656	15.6429	56.4235666666667	19.4144333333333	down	1.53916826634781	0.279817751240164
mtr-miR5236a	1.1074	0.0000	0.9966	0.0000	0.0000	0.0000	0.701333333333333	0	down	12.7758845834585	0.999999999999998
mtr-miR482-5p	1.2377	2.7981	2.1355	1.8500	1.1678	0.0000	2.0571	1.00593333333333	down	1.03207723209533	1
mtr-miR482-3p	275.8730	365.6618	440.1944	158.1377	167.3867	135.4404	360.5764	153.654933333333	down	1.23061088670291	0.484661394036614
mtr-miR5239	10.7483	4.3879	15.6602	3.6999	2.8806	3.1443	10.2654666666667	3.2416	down	1.66302122928603	0.535857895509372
mtr-miR5249	0.9120	1.1447	2.7761	0.8907	1.0121	0.0000	1.61093333333333	0.634266666666667	down	1.3447353612741	1
mtr-miR5266	0.0000	0.0000	0.0000	0.6852	0.0000	0.0000	0	0.2284	up	11.1573469353628	1
mtr-miR5269b	0.9120	0.8903	1.8508	0.0000	0.0000	0.0000	1.2177	0	down	13.5718711254188	0.505637893430191
mtr-miR5270a	0.0000	0.0000	0.8542	0.0000	0.0000	0.0000	0.284733333333333	0	down	11.475395681921	1
mtr-miR5282	1.1074	0.8267	1.1389	0.0000	0.0000	0.7861	1.02433333333333	0.262033333333333	down	1.96686301202212	1
mtr-miR5286a	1.1074	0.6359	1.2101	0.0000	0.0000	0.0000	0.984466666666667	0	down	13.2651266429993	0.50586252795107
mtr-miR5286b	1.1074	1.1447	1.3525	0.0000	0.0000	0.0000	1.20153333333333	0	down	13.5525890522932	0.258512159372093
mtr-miR5290	0.0000	0.6359	0.8542	0.0000	0.0000	0.0000	0.4967	0	down	12.2781590314372	1
mtr-miR5295a	0.6514	0.6359	0.7830	0.0000	0.0000	0.0000	0.6901	0	down	12.752589717641	1
gma-miR5368	0.0000	1.0175	0.7830	0.0000	0.8564	0.0000	0.600166666666667	0.285466666666667	down	1.07204089869213	1
gma-miR5037b	2.1497	1.3991	7.4030	1.2333	0.9343	0.0000	3.6506	0.722533333333333	down	2.33699754833633	0.371062550815222
gma-miR166i-5p	0.7166	1.0175	0.0000	0.0000	0.0000	0.0000	0.578033333333333	0	down	12.4969369753951	1
gma-miR396h	1.1725	0.8267	1.9219	0.0000	0.0000	0.0000	1.30703333333333	0	down	13.6740083142723	0.258293165823296
aau-miR319	236.8534	99.7780	313.7026	134.8419	90.3110	73.2620	216.778	99.4716333333333	down	1.12386127918984	0.956851227138078
aau-miR162	34.1991	19.1416	42.6385	18.0885	10.1211	12.5772	31.9930666666667	13.5956	down	1.23461946564194	0.771563729070121
mtr-miR5037a	6.3838	1.3991	14.0942	2.6722	2.2578	1.3363	7.29236666666667	2.08876666666667	down	1.80373576331696	0.468800161818956
bna-miR167d	1.9542	0.0000	3.5591	1.6444	0.0000	0.0000	1.83776666666667	0.548133333333333	down	1.74535482917359	1
cca-miR390	0.0000	0.0000	0.0000	1.0963	0.0000	0.7861	0	0.627466666666667	up	12.6153231045031	0.50644266613933
cca-miR408	0.0000	0.8267	0.8542	0.0000	0.0000	0.0000	0.5603	0	down	12.4519837772302	0.999999999999999
cca-miR6118-3p	0.0000	0.0000	1.0677	0.0000	0.0000	0.0000	0.3559	0	down	11.7972562175098	1
hbr-miR398	0.7166	0.0000	0.0000	0.0000	0.0000	0.0000	0.238866666666667	0	down	11.2219898274896	1
ppe-miR398b	0.7817	0.0000	0.0000	0.0000	0.0000	0.0000	0.260566666666667	0	down	11.3474368217126	1
gma-miR166u	27.4896	22.0033	90.6869	11.3739	13.3909	8.8826	46.7266	11.2158	down	2.05871153663069	0.0709410076005032
han-miR3630-3p	29.4438	32.8778	24.9852	7.9480	8.0190	8.9612	29.1022666666667	8.3094	down	1.80831531098801	0.107724850553515
cln-miR166	0.0000	0.6359	0.0000	0.0000	0.0000	0.0000	0.211966666666667	0	down	11.0496216927725	1
cme-miR166i	2.5405	2.1622	3.5591	0.8222	1.0900	0.0000	2.75393333333333	0.6374	down	2.11122271119453	0.523773323208604
cme-miR156e	3.7782	0.6359	6.9047	1.7814	1.3235	1.0219	3.77293333333333	1.3756	down	1.45562558738189	1
cme-miR166g	286.2956	248.2685	885.7275	168.4153	161.7812	126.8722	473.430533333333	152.356233333333	down	1.63570422790525	0.223462496253491
cme-miR159b	0.6514	0.0000	0.0000	0.0000	0.0000	0.0000	0.217133333333333	0	down	11.0843655036747	1
mes-miR166i	2.2148	1.8442	4.1286	0.0000	0.9343	0.0000	2.7292	0.311433333333333	down	3.13148284907833	0.306744463857446
mtr-miR2592bo-5p	12.3117	6.0414	18.3652	3.4944	3.8149	4.3234	12.2394333333333	3.87756666666667	down	1.65831327432966	0.481675057784664
bdi-miR5174e-3p.2	3.7782	4.3879	4.9828	1.9185	2.0242	1.2577	4.38296666666667	1.73346666666667	down	1.33824761211546	1
bdi-miR5049-5p	1.2377	1.7806	2.2778	0.8222	0.0000	0.0000	1.76536666666667	0.274066666666667	down	2.68736908609402	0.388014812764104
stu-miR398a-3p	3.3222	0.0000	0.0000	0.0000	0.0000	0.0000	1.1074	0	down	13.4348888065304	0.372523369208432
ppe-miR396a	1.4331	1.0811	4.7692	0.0000	0.0000	0.0000	2.4278	0	down	14.5673619581065	0.0697495522999673
cpa-miR8155	29.1833	28.2355	47.6925	15.4849	10.6660	12.8130	35.0371	12.9879666666667	down	1.43170778177115	0.330283997568263
lus-miR398f	1.3028	0.0000	0.0000	0.0000	0.0000	0.0000	0.434266666666667	0	down	12.0843655036747	1
atr-miR319a	14.9825	13.6090	15.1619	6.6462	7.3962	6.0528	14.5844666666667	6.6984	down	1.12254419453165	0.908473433749965
bdi-miR160f	14.5916	10.0478	23.5615	6.3721	7.5519	3.6159	16.0669666666667	5.84663333333333	down	1.45841956190496	0.550330949563799
bdi-miR845	0.7166	0.0000	1.0677	0.0000	0.0000	0.0000	0.594766666666667	0	down	12.5381080793587	0.999999999999999
bdi-miR2118a	0.0000	0.0000	0.7830	0.0000	0.0000	0.0000	0.261	0	down	11.3498340914572	1
gma-miR9749	0.9771	0.0000	2.2778	0.0000	0.0000	0.0000	1.08496666666667	0	down	13.4053630991101	0.506677974659059
ata-miR2118c-3p	0.0000	0.0000	1.2101	0.0000	0.0000	0.0000	0.403366666666667	0	down	11.9778761523966	0.999999999999999
ata-miR396e-3p	0.0000	0.0000	1.0677	0.0000	0.0000	0.0000	0.3559	0	down	11.7972562175098	0.999999999999998
ata-miR167b-5p	6.1884	1.0811	12.0299	4.1796	1.6349	2.2010	6.43313333333333	2.67183333333333	down	1.26769157379716	1
ata-miR408-3p	0.0000	0.0000	0.7830	0.0000	0.0000	0.0000	0.261	0	down	11.3498340914572	1
ata-miR167f-5p	0.8468	0.0000	2.3490	0.0000	0.0000	0.0000	1.06526666666667	0	down	13.3789270029776	0.50681156403685
ata-miR398g-5p	2.7359	0.0000	0.0000	0.0000	0.0000	0.0000	0.911966666666667	0	down	13.1547653780065	0.517621209970775
ata-miR166c-5p	3.9085	5.4690	7.5454	1.8500	1.7128	0.9433	5.64096666666667	1.50203333333333	down	1.90902558216558	0.387627620539734
ata-miR166c-3p	0.0000	0.0000	0.7830	0.0000	0.0000	0.0000	0.261	0	down	11.3498340914572	1
