# Supplementary material for: Identification of Drought-Responsive microRNAs from Roots and Leaves of Alfalfa by High-Throughput Sequencing
Source: Preprints.org preprint supplement (doi:10.20944/preprints201702.0085.v1), 2017-02-23
Supplement: Supplementary file 5 [file Table S4. Members and expression abundance of drought-responsive miRNAs from roots of alfalfa treated with drought and irrigation.xlsx]

## Sheet: Sheet1
miRNA_ID	WR-1	WR-2	WR-3	DR-1	DR-2	DR-3	WR-1,WR-2,WR-3	DR-1,DR-2,DR-3	log2(foldchange)	P-value
ahy-miR398	1366.34	8.5215	41.0725	8.9758	8.1747	18.1583	471.977	11.7696	-5.3256	0.0314516
cpa-miR166e	29.8347	30.5884	51.1804	4.9332	4.9048	3.5373	37.2012	4.4584	-3.0608	1.5092e-16
aau-miR396	92.0445	46.1688	184.648	20.2811	19.4636	11.4767	107.621	17.0738	-2.6561	0.000112875
mtr-miR1507-3p	18.9561	10.6201	23.5615	3.5629	2.647	2.2796	17.7126	2.8298	-2.646	3.11429e-08
aqc-miR166a	11.8557	7.8856	13.9518	2.0555	1.5571	2.201	11.231	1.9379	-2.5349	2.60999e-05
bdi-miR159a-3p	5.6021	3.6884	6.4776	1.2333	0.8564	0.8647	5.256	0.9848	-2.4161	0.000126002
bdi-miR159b-3p.1	25.4702	12.5915	54.1701	6.7147	5.4498	5.2667	30.7439	5.8104	-2.4036	0.00345919
aly-miR396b-5p	36.7396	24.8014	115.672	13.7034	12.301	11.5553	59.071	12.5199	-2.2382	0.0345028
atr-miR166b	176.533	160.51	263.447	46.3176	53.0966	37.4171	200.163	45.6104	-2.1337	4.04281e-09
aqc-miR166c	91.2628	83.6253	193.688	28.5717	32.8545	23.5036	122.859	28.3099	-2.1176	1.28081e-05
aau-miR160	37.4562	22.7028	40.503	7.948	7.7076	8.0179	33.554	7.8912	-2.0882	0.000202286
ahy-miR159	998.81	544.232	1100.13	264.888	218.77	181.976	881.057	221.878	-1.9895	0.000126341
hbr-miR166a	23.516	21.4946	40.0759	7.811	8.8754	5.6597	28.3622	7.4487	-1.9289	5.88686e-05
ata-miR166c-5p	3.9085	5.469	7.5454	1.85	1.7128	0.9433	5.641	1.502	-1.9091	0.0311673
nta-miR482a	123.377	89.4759	152.118	43.851	33.1659	36.238	121.657	37.7516	-1.6882	0.0113427
aly-miR166a-3p	1573.09	1536.35	2637.54	737.108	728.405	554.181	1915.66	673.231	-1.5087	0.0170963
gma-miR319d	16.9367	4.4515	36.3032	44.3992	67.5775	19.7304	19.2305	43.9024	1.1909	0.000961916
aly-miR157a-3p	1.5634	0.6995	1.7084	4.0425	2.9585	2.1224	1.3238	3.0411	1.1999	3.5241e-09

## Sheet: Sheet2
miRNA_ID	WR-1	WR-2	WR-3	DR-1	DR-2	DR-3	WR-1,WR-2,WR-3	DR-1,DR-2,DR-3	log2(foldchange)	P-value
ahy-miR398	1366.34	8.5215	41.0725	8.9758	8.1747	18.1583	471.977	11.7696	-5.3256	0.0314516
cpa-miR166e	29.8347	30.5884	51.1804	4.9332	4.9048	3.5373	37.2012	4.4584	-3.0608	1.5092e-16
aau-miR396	92.0445	46.1688	184.648	20.2811	19.4636	11.4767	107.621	17.0738	-2.6561	0.000112875
mtr-miR1507-3p	18.9561	10.6201	23.5615	3.5629	2.647	2.2796	17.7126	2.8298	-2.646	3.11429e-08
aqc-miR166a	11.8557	7.8856	13.9518	2.0555	1.5571	2.201	11.231	1.9379	-2.5349	2.60999e-05
bdi-miR159a-3p	5.6021	3.6884	6.4776	1.2333	0.8564	0.8647	5.256	0.9848	-2.4161	0.000126002
bdi-miR159b-3p.1	25.4702	12.5915	54.1701	6.7147	5.4498	5.2667	30.7439	5.8104	-2.4036	0.00345919
aly-miR396b-5p	36.7396	24.8014	115.672	13.7034	12.301	11.5553	59.071	12.5199	-2.2382	0.0345028
atr-miR166b	176.533	160.51	263.447	46.3176	53.0966	37.4171	200.163	45.6104	-2.1337	4.04281e-09
aqc-miR166c	91.2628	83.6253	193.688	28.5717	32.8545	23.5036	122.859	28.3099	-2.1176	1.28081e-05
aau-miR160	37.4562	22.7028	40.503	7.948	7.7076	8.0179	33.554	7.8912	-2.0882	0.000202286
ahy-miR159	998.81	544.232	1100.13	264.888	218.77	181.976	881.057	221.878	-1.9895	0.000126341
hbr-miR166a	23.516	21.4946	40.0759	7.811	8.8754	5.6597	28.3622	7.4487	-1.9289	5.88686e-05
ata-miR166c-5p	3.9085	5.469	7.5454	1.85	1.7128	0.9433	5.641	1.502	-1.9091	0.0311673
nta-miR482a	123.377	89.4759	152.118	43.851	33.1659	36.238	121.657	37.7516	-1.6882	0.0113427
aly-miR166a-3p	1573.09	1536.35	2637.54	737.108	728.405	554.181	1915.66	673.231	-1.5087	0.0170963
mtr-miR5213-5p	1243.28	777.492	1694.58	945.195	741.718	837.246	1238.45	841.386	-0.5577	0.0150829
mtr-miR2643a	7.1655	4.8331	10.6062	6.4406	4.7491	5.5811	7.5349	5.5903	-0.4307	0.0114679
tae-miR5049-3p	1.9542	2.1622	3.3456	1.9185	2.4913	1.6508	2.4873	2.0202	-0.3001	0.0200404
mtr-miR5281a	2.1497	1.717	3.2032	1.9185	1.8685	1.9652	2.3566	1.9174	-0.2976	0.0132623
mtr-miR5211	9.3803	11.9556	16.372	12.4701	9.4982	9.9831	12.5693	10.6505	-0.239	0.0113964
gma-miR164b	10.7483	8.6487	18.4363	13.772	14.2473	7.7035	12.6111	11.9076	-0.0828	5.80342e-05
hbr-miR6173	2.2148	1.9078	2.8473	1.85	3.4256	1.3363	2.3233	2.204	-0.0761	0.0305258
mtr-miR5281b	8.4032	8.0764	11.674	9.3183	10.1989	9.6687	9.3845	9.7286	0.052	2.09779e-05
gma-miR396a-3p	2.6056	0.8903	2.5626	2.8092	2.0242	1.808	2.0195	2.2138	0.1325	0.00271941
cme-miR168	6.1884	8.5851	7.1183	8.8387	9.3425	6.1314	7.2973	8.1042	0.1513	0.0100756
aly-miR390a-5p	34.8505	15.0716	83.711	67.2154	48.7368	32.622	44.5444	49.5247	0.1529	0.00666492
gma-miR168b	3.3873	4.3243	4.1998	4.7277	6.3062	3.5373	3.9705	4.8571	0.2908	0.00149514
gma-miR6300	2.8011	2.7345	3.3456	4.0425	5.2162	5.5025	2.9604	4.9204	0.733	4.23643e-06
gma-miR319d	16.9367	4.4515	36.3032	44.3992	67.5775	19.7304	19.2305	43.9024	1.1909	0.000961916
aly-miR157a-3p	1.5634	0.6995	1.7084	4.0425	2.9585	2.1224	1.3238	3.0411	1.1999	3.5241e-09
mtr-miR5294a	2.4754	2.6073	3.9862	2.5351	2.4135	1.6508	3.023	2.1998	-0.4586	0.0517722
gma-miR166u	27.4896	22.0033	90.6869	11.3739	13.3909	8.8826	46.7266	11.2158	-2.0587	0.0605267
bdi-miR166e-3p	4.2993	4.7059	7.6166	1.1648	2.4135	0.9433	5.5406	1.5072	-1.8782	0.061521
han-miR3630-3p	29.4438	32.8778	24.9852	7.948	8.019	8.9612	29.1023	8.3094	-1.8083	0.0824587
aly-miR164a-5p	73.6096	60.7317	129.766	63.9951	76.5308	34.43	88.0358	58.3186	-0.5941	0.0885965
pab-miR3711	17.2624	47.5678	14.5213	4.6592	8.7197	3.5373	26.4505	5.6387	-2.2299	0.091294
gma-miR1511	361.078	363.245	560.066	184.38	115.38	130.567	428.13	143.442	-1.5776	0.0945394
mtr-miR5277	2.6056	0.8267	2.0643	1.1648	1.5571	2.201	1.8322	1.641	-0.159	0.0966151
pab-miR396a	5.1462	2.1622	16.728	0.8907	1.5571	0	8.0121	0.8159	-3.2957	0.108798
gma-miR162a	2.7359	1.6534	4.5557	1.85	1.8685	2.3582	2.9817	2.0256	-0.5578	0.111834
gma-miR319q	11.2694	4.3879	18.1516	10.072	5.9948	6.9174	11.2696	7.6614	-0.5568	0.141901
mtr-miR5276	1.368	1.9714	1.4948	1.3018	1.7906	1.0219	1.6114	1.3714	-0.2327	0.160946
mtr-miR2199	1.2377	1.9078	2.1355	2.3296	0.8564	1.3363	1.7603	1.5074	-0.2238	0.162941
mtr-miR1510b-3p	2.6708	1.5898	6.3353	3.2203	2.4135	1.4149	3.532	2.3496	-0.5881	0.180039
mtr-miR5287a	7.8169	6.8681	13.24	6.7832	5.2162	4.3234	9.3083	5.4409	-0.7747	0.181868
peu-miR2916	77.3877	117.648	91.6834	78.1781	81.5134	65.0868	95.5729	74.9261	-0.3511	0.182972
mtr-miR5285a	2.0194	2.1622	2.2067	1.5074	2.0242	1.1791	2.1294	1.5702	-0.4395	0.186836
mtr-miR2592bo-5p	12.3117	6.0414	18.3652	3.4944	3.8149	4.3234	12.2394	3.8776	-1.6583	0.191038
aly-miR319c-3p	0.7166	0.8903	1.9219	0.7537	0.7785	0.9433	1.1763	0.8252	-0.5114	0.197008
pta-miR159a	4.7553	1.5898	8.1148	1.6444	1.5571	0.7861	4.82	1.3292	-1.8585	0.199118
bdi-miR160f	14.5916	10.0478	23.5615	6.3721	7.5519	3.6159	16.067	5.8466	-1.4584	0.204477
ctr-miR171	13.1585	9.9206	25.6258	7.6739	5.6834	3.1443	16.235	5.5005	-1.5615	0.209939
mtr-miR5239	10.7483	4.3879	15.6602	3.6999	2.8806	3.1443	10.2655	3.2416	-1.663	0.219067
cpa-miR8155	29.1833	28.2355	47.6925	15.4849	10.666	12.813	35.0371	12.988	-1.4317	0.246359
mtr-miR5232	38.1076	32.4326	98.7305	21.0348	21.5656	15.6429	56.4236	19.4144	-1.5392	0.247533
csi-miR171a	40.9087	28.299	103.856	22.2681	21.0207	14.3065	57.6878	19.1984	-1.5873	0.27086
cme-miR166g	286.296	248.268	885.727	168.415	161.781	126.872	473.43	152.356	-1.6357	0.274824
mtr-miR5287b	2.8662	2.2894	4.0574	1.9185	1.7906	1.7294	3.071	1.8128	-0.7605	0.280162
mtr-miR166e-5p	32.8963	43.0527	44.3469	14.8682	13.7802	15.4856	40.0986	14.7113	-1.4466	0.283185
cme-miR166i	2.5405	2.1622	3.5591	0.8222	1.09	0	2.7539	0.6374	-2.1112	0.284732
aqc-miR398b	44.6869	10.6837	12.5994	7.6739	7.7854	4.795	22.6567	6.7514	-1.7467	0.302938
ssp-miR1128	1.6937	2.2258	2.5626	1.5759	1.5571	1.1005	2.1607	1.4112	-0.6146	0.304667
ptc-miR6478	17.0019	10.1749	12.8841	4.7277	8.7197	16.5861	13.3536	10.0112	-0.4156	0.311
gma-miR2118a-3p	84.0973	57.7428	146.067	41.727	42.9756	30.1066	95.9691	38.2697	-1.3264	0.312134
aly-miR156a-5p	3.9736	2.4165	7.3318	1.9185	1.7128	1.2577	4.574	1.6297	-1.4888	0.3309
aly-miR165a-5p	9.3803	8.4579	9.1114	6.3036	5.1384	5.3453	8.9832	5.5958	-0.6829	0.331338
mtr-miR1510a-5p	99.21	58.6331	189.346	46.3176	44.6105	36.9454	115.73	42.6245	-1.441	0.335514
gma-miR5037b	2.1497	1.3991	7.403	1.2333	0.9343	0	3.6506	0.7225	-2.3371	0.337838
lus-miR159b	2.0194	1.5898	4.8404	1.987	1.7128	1.1005	2.8165	1.6001	-0.8157	0.357374
mtr-miR5214-3p	21.8223	11.4468	13.9518	7.3313	5.8391	4.8737	15.7403	6.0147	-1.3879	0.367655
ahy-miR408-3p	11.6603	18.5057	26.8359	5.8925	5.2941	8.2538	19.0006	6.4801	-1.552	0.372675
bdi-miR5174e-3p.2	3.7782	4.3879	4.9828	1.9185	2.0242	1.2577	4.383	1.7335	-1.3382	0.392685
aly-miR166f-5p	1.5634	2.353	3.7727	1.1648	0.8564	0	2.563	0.6737	-1.9277	0.40184
gma-miR1507a	3.9736	2.1622	6.5488	1.6444	0	1.0219	4.2282	0.8888	-2.2501	0.411742
aly-miR168a-3p	7.5564	7.504	8.2572	5.6184	4.5934	3.6159	7.7725	4.6092	-0.7539	0.443526
mtr-miR5037a	6.3838	1.3991	14.0942	2.6722	2.2578	1.3363	7.2924	2.0888	-1.8037	0.447943
cme-miR319c	1.824	0.8267	5.3387	1.5759	1.4792	1.3363	2.6631	1.4638	-0.8634	0.4685
gma-miR319f	5.081	13.9269	13.8095	0.6852	7.474	2.4368	10.9391	3.532	-1.6309	0.503764
osa-miR5077	4.4296	7.7584	6.2641	2.4666	3.6592	1.3363	6.1507	2.4874	-1.3061	0.506958
aly-miR165a-3p	216.138	223.721	340.183	119.288	126.591	94.6432	260.014	113.508	-1.1958	0.521214
mtr-miR482-3p	275.873	365.662	440.194	158.138	167.387	135.44	360.576	153.655	-1.2306	0.526602
gma-miR4403	1.4331	1.3355	2.1355	0.7537	0.8564	0	1.6347	0.5367	-1.6068	0.546531
gma-miR171k-5p	3.5828	1.4626	4.4133	2.6722	1.4792	1.1005	3.1529	1.7506	-0.8488	0.575881
aly-miR168a-5p	53.7415	67.5997	64.4204	29.1883	29.4289	23.425	61.9205	27.3474	-1.179	0.599595
bdi-miR5281a	4.2993	2.9253	4.6981	1.987	2.0242	2.3582	3.9742	2.1231	-0.9045	0.601148
atr-miR167	20.1938	9.2846	49.9703	17.883	11.211	10.6906	26.4829	13.2615	-0.9978	0.610632
ppt-miR894	2.8662	5.1511	4.271	2.7407	2.3356	2.3582	4.0961	2.4782	-0.725	0.62962
ata-miR164a-5p	1.3028	0.6995	2.2778	1.3018	1.7128	0	1.4267	1.0049	-0.5056	0.662245
mtr-miR2118	182.851	152.179	212.125	75.2319	106.271	65.0082	182.385	82.1704	-1.1503	0.664674
aly-miR164c-5p	4.8204	3.2433	11.8875	3.0148	4.5934	2.2796	6.6504	3.2959	-1.0128	0.674893
csi-miR472	1.6937	1.3355	2.5626	1.0963	0.9343	0	1.8639	0.6769	-1.4613	0.675183
ahy-miR167-5p	12.898	3.434	28.4731	7.948	4.2041	3.3015	14.935	5.1512	-1.5357	0.684754
mtr-miR5284a	1.6937	1.5262	3.132	1.3703	1.0121	0.8647	2.1173	1.0824	-0.968	0.699023
mtr-miR2586a	2.2148	1.9078	3.7015	1.5074	0	1.1005	2.608	0.8693	-1.585	0.740016
atr-miR319a	14.9825	13.609	15.1619	6.6462	7.3962	6.0528	14.5845	6.6984	-1.1225	0.740438
aau-miR162	34.1991	19.1416	42.6385	18.0885	10.1211	12.5772	31.9931	13.5956	-1.2346	0.746043
vvi-miR396b	11.2043	4.8331	35.8049	6.9202	7.1626	4.5592	17.2808	6.214	-1.4756	0.758066
ahy-miR160-5p	19.4121	13.7362	28.2596	10.9628	11.3667	7.5463	20.4693	9.9586	-1.0394	0.758564
aly-miR396a-3p	12.9631	12.3371	22.2802	10.4831	8.2526	5.2667	15.8601	8.0008	-0.9872	0.760383
mtr-miR399b	1.9542	1.717	4.5557	1.2333	0.8564	1.1791	2.7423	1.0896	-1.3316	0.763815
mtr-miR2585a	1.8891	2.353	4.4845	0.9592	1.8685	0.8647	2.9089	1.2308	-1.2409	0.767868
aly-miR159b-3p	8.9243	5.1511	18.294	6.7147	4.4377	4.009	10.7898	5.0538	-1.0942	0.798125
cme-miR156e	3.7782	0.6359	6.9047	1.7814	1.3235	1.0219	3.7729	1.3756	-1.4556	0.800238
mtr-miR5249	0.912	1.1447	2.7761	0.8907	1.0121	0	1.6109	0.6343	-1.3446	0.818582
aly-miR167a-5p	2.7359	1.0811	5.2675	1.9185	1.2457	1.1005	3.0282	1.4216	-1.0909	0.824351
csi-miR171b	5.7976	1.2083	5.3387	2.0555	2.0242	1.0219	4.1149	1.7005	-1.2749	0.835775
mtr-miR2614	2.9314	2.7345	5.054	1.7814	1.6349	1.3363	3.5733	1.5842	-1.1735	0.844796
gma-miR171m	0.6514	0	2.6338	0.9592	0.7785	0	1.0951	0.5792	-0.9189	0.848303
gma-miR1510b-3p	1.6937	0.6995	2.9897	0.7537	0	1.1005	1.7943	0.6181	-1.5375	0.893774
mtr-miR482-5p	1.2377	2.7981	2.1355	1.85	1.1678	0	2.0571	1.0059	-1.0321	0.897539
aly-miR166a-5p	48.9862	51.1291	54.0277	27.2699	23.9013	23.425	51.381	24.8654	-1.0471	0.925046
aau-miR319	236.853	99.778	313.703	134.842	90.311	73.262	216.778	99.4716	-1.1239	0.957042
ata-miR167b-5p	6.1884	1.0811	12.0299	4.1796	1.6349	2.201	6.4331	2.6718	-1.2677	0.990887
mtr-miR2603	11.986	10.3021	17.8669	6.9202	6.1505	5.7383	13.385	6.2697	-1.0941	1
mtr-miR5205c	2.2148	1.717	2.2778	1.3018	0.9343	0.7861	2.0699	1.0074	-1.0389	1
