# Supplementary material for: Identification of Drought-Responsive microRNAs from Roots and Leaves of Alfalfa by High-Throughput Sequencing
Source: Preprints.org preprint supplement (doi:10.20944/preprints201702.0085.v1), 2017-02-23
Supplement: Supplementary file 6 [file Table S5. Members and expression abundance of drought-responsive miRNAs from leaves of alfalfa treated with drought and irrigation.xlsx]

## Sheet: Sheet1
miRNA_ID	WL-1	WL-2	WL-3	DL-1	DL-2	DL-3	WL-1,WL-2,WL-3	DL-1,DL-2,DL-3	log2(foldchange)	P-value
ahy-miR3512	9.0363	7.6931	5.5532	1.6603	1.2118	0	7.4275	0.9574	-2.9557	0.000201241
gma-miR5368	28.8755	35.4254	25.894	12.4916	8.0785	9.1071	30.065	9.8924	-1.6037	3.29257e-05
han-miR3630-3p	25.2745	15.9445	7.9866	8.4595	5.0895	4.1103	16.4019	5.8864	-1.4784	2.76332e-08
hbr-miR6173	5.9789	5.7698	4.0557	2.609	1.9388	1.1283	5.2681	1.892	-1.4774	1.24979e-05
lus-miR159b	8.7646	2.6057	0.9359	22.3742	22.7815	12.0085	4.1021	19.0547	2.2157	0.0292746
atr-miR319a	37.4362	5.7078	2.2462	91.8687	90.4796	40.9416	15.1301	74.43	2.2985	0.0427435
gma-miR319d	230.732	54.41	24.0221	787.762	537.303	490.897	103.055	605.321	2.5543	0.00318308
mtr-miR5213-5p	2491.44	557.625	372.187	6620.47	7215.83	6897.78	1140.42	6911.36	2.5994	0.00402325
gma-miR319q	7.6775	2.3576	1.8719	46.8831	23.0238	20.9544	3.969	30.2871	2.9319	0.00635197
mtr-miR5294a	11.1425	4.7772	3.2445	52.022	47.0979	61.9766	6.3881	53.6988	3.0714	0.00616162
aly-miR157a-3p	13.1129	4.9633	3.3069	93.7661	59.2965	113.718	7.1277	88.9268	3.6411	0.00067963
mtr-miR156g-3p	2.378	0.7445	0	20.0024	11.3907	21.2767	1.0408	17.5566	4.0762	0.00806472

## Sheet: Sheet2
miRNA_ID	WL-1	WL-2	WL-3	DL-1	DL-2	DL-3	WL-1,WL-2,WL-3	DL-1,DL-2,DL-3	log2(foldchange)	P-value
ahy-miR3512	9.0363	7.6931	5.5532	1.6603	1.2118	0	7.4275	0.9574	-2.9557	0.000201241
gma-miR5368	28.8755	35.4254	25.894	12.4916	8.0785	9.1071	30.065	9.8924	-1.6037	3.29257e-05
han-miR3630-3p	25.2745	15.9445	7.9866	8.4595	5.0895	4.1103	16.4019	5.8864	-1.4784	2.76332e-08
hbr-miR6173	5.9789	5.7698	4.0557	2.609	1.9388	1.1283	5.2681	1.892	-1.4774	1.24979e-05
mtr-miR5277	15.7626	29.3454	1.6847	9.8035	14.1374	4.5938	15.5976	9.5116	-0.7136	0.021909
pab-miR3711	30.1664	67.0043	42.5535	38.2654	40.0695	42.7147	46.5747	40.3499	-0.207	0.0167735
aau-miR160	31.4573	16.1927	10.9191	23.5601	22.6199	9.913	19.523	18.6977	-0.0623	0.000548842
gma-miR4995	2.5818	3.2882	3.8061	3.6368	4.2008	2.0148	3.2254	3.2841	0.026	0.0184462
mtr-miR2675	2.8536	1.3649	0.8735	1.8975	2.0196	1.6119	1.6973	1.843	0.1188	0.00935845
osa-miR5077	10.1913	4.9012	4.1181	8.4595	7.8362	4.5938	6.4035	6.9632	0.1209	0.003324
mes-miR166i	8.1531	3.4123	1.9966	4.1902	5.4126	6.2057	4.5207	5.2695	0.2211	0.0431526
cpa-miR166e	96.6819	49.1365	25.6444	69.7316	57.8423	73.9851	57.1543	67.1863	0.2333	0.0222834
aqc-miR166a	37.0965	17.6817	8.9225	26.7226	26.9823	24.5005	21.2336	26.0685	0.296	0.00856475
ctr-miR171	4.4842	2.3576	1.3727	4.9808	3.2314	2.0148	2.7382	3.409	0.3161	0.0128434
mtr-miR2592a.2-3p	2.5139	0.9306	0.6863	1.6603	2.1812	1.3701	1.3769	1.7372	0.3353	0.0376982
lus-miR159b	8.7646	2.6057	0.9359	22.3742	22.7815	12.0085	4.1021	19.0547	2.2157	0.0292746
atr-miR319a	37.4362	5.7078	2.2462	91.8687	90.4796	40.9416	15.1301	74.43	2.2985	0.0427435
gma-miR319d	230.732	54.41	24.0221	787.762	537.303	490.897	103.055	605.321	2.5543	0.00318308
mtr-miR5213-5p	2491.44	557.625	372.187	6620.47	7215.83	6897.78	1140.42	6911.36	2.5994	0.00402325
gma-miR319q	7.6775	2.3576	1.8719	46.8831	23.0238	20.9544	3.969	30.2871	2.9319	0.00635197
mtr-miR5294a	11.1425	4.7772	3.2445	52.022	47.0979	61.9766	6.3881	53.6988	3.0714	0.00616162
aly-miR157a-3p	13.1129	4.9633	3.3069	93.7661	59.2965	113.718	7.1277	88.9268	3.6411	0.00067963
mtr-miR156g-3p	2.378	0.7445	0	20.0024	11.3907	21.2767	1.0408	17.5566	4.0762	0.00806472
mtr-miR482-5p	5.911	2.0474	0.8735	5.3761	4.0393	2.982	2.944	4.1325	0.4892	0.0502541
mtr-miR5270a	2.8536	1.9233	0.8735	2.2137	1.7773	2.6596	1.8835	2.2169	0.2351	0.0527085
mtr-miR2643a	128.275	21.7764	7.8618	249.358	363.938	133.947	52.6377	249.081	2.2424	0.0600433
mtr-miR2585a	9.6478	3.3502	2.1214	9.0129	10.5829	5.561	5.0398	8.3856	0.7345	0.0665452
aly-miR172a-3p	11.4822	1.4269	0.9359	4.1902	6.2205	2.0148	4.615	4.1418	-0.1561	0.0700082
aly-miR165a-5p	23.2363	8.0653	4.4924	92.1849	76.2614	24.6617	11.9313	64.3693	2.4316	0.0767292
mtr-miR1510b-3p	12.4334	4.1567	3.0574	41.9022	32.5565	19.4231	6.5492	31.2939	2.2565	0.0775006
bdi-miR5281a	17.5291	6.018	4.1181	43.4044	45.4822	33.93	9.2217	40.9389	2.1504	0.0780395
gma-miR6300	1.4268	0.9927	2.4334	3.4787	2.262	1.2089	1.6176	2.3165	0.5181	0.0840763
ppt-miR894	7.2698	4.3429	3.1198	8.6967	11.0676	5.8027	4.9108	8.5223	0.7953	0.0873056
mtr-miR5232	40.2218	13.649	7.3626	92.264	77.8771	121.294	20.4111	97.1449	2.2508	0.0895229
aly-miR168a-3p	37.9118	15.2	9.2345	98.5888	85.6325	138.782	20.7821	107.668	2.3732	0.103505
sly-miR156e-3p	6.4545	2.0474	1.2479	11.5429	17.6112	13.8621	3.2499	14.3387	2.1414	0.108994
atr-miR167	736.223	136.49	72.6279	1404.91	1439.19	718.977	315.114	1187.69	1.9142	0.113185
aly-miR399a-3p	2.2421	1.6751	0.9359	3.1624	3.9585	0.9671	1.6177	2.696	0.7369	0.115055
gma-miR396a-3p	6.3866	0.8686	0	21.5045	19.954	8.14	2.4184	16.5328	2.7732	0.120168
osa-miR166e-3p	11.5502	5.8939	2.4958	9.3292	6.8668	11.1219	6.6466	9.106	0.4542	0.124473
aly-miR167a-5p	51.6361	8.0653	2.1838	90.2875	103.89	53.0307	20.6284	82.4027	1.9981	0.128873
ahy-miR160-5p	22.7607	8.8098	5.054	70.3641	44.432	42.6341	12.2082	52.4767	2.1038	0.129362
mtr-miR5282	2.4459	1.0547	0.8111	2.3718	2.4236	2.0954	1.4372	2.2969	0.6764	0.130764
aly-miR166a-5p	96.546	37.9691	21.2767	314.188	300.683	112.186	51.9306	242.352	2.2225	0.132569
aly-miR159b-3p	46.9481	8.2515	1.7471	88.3109	99.6084	46.7444	18.9822	78.2212	2.0429	0.135368
cme-miR166g	1426.99	473.621	184.814	2834.96	2417.5	2703.11	695.142	2651.86	1.9316	0.137366
ptc-miR6478	32.3405	12.4082	3.6189	26.0901	33.0412	15.3934	16.1225	24.8416	0.6237	0.14043
gma-miR396h	3.8048	0.8686	0	1.1069	0.8079	0	1.5578	0.6383	-1.2872	0.160846
cme-miR319c	9.5119	0.6204	0	24.5879	23.7509	9.8324	3.3774	19.3904	2.5214	0.174292
mtr-miR5211	2.0383	0.6204	0	2.9253	2.5851	9.3489	0.8862	4.9531	2.4826	0.178281
peu-miR2916	55.8486	91.7587	78.6802	159.94	121.42	140.878	75.4292	140.746	0.8999	0.181706
tae-miR5049-3p	3.0574	2.4816	1.0607	12.2544	10.5021	13.9427	2.1999	12.2331	2.4753	0.182363
mtr-miR5281a	9.5799	5.0253	2.6206	28.541	23.7509	25.9512	5.7419	26.081	2.1834	0.185735
hbr-miR166a	111.629	44.4834	19.5921	303.752	217.878	145.149	58.5682	222.26	1.9241	0.187393
mtr-miR5285a	6.1148	3.1641	2.5582	9.1711	9.6942	5.0774	3.9457	7.9809	1.0163	0.187768
aly-miR156a-5p	59.4495	9.3062	2.8078	65.2252	108.656	77.6118	23.8545	83.8311	1.8132	0.192928
ata-miR166c-3p	3.8048	1.3649	0	13.5194	8.3209	7.737	1.7232	9.8591	2.5164	0.201431
aly-miR319c-3p	4.756	1.1167	0.624	9.092	8.3209	5.561	2.1656	7.658	1.8222	0.204012
mtr-miR482-3p	519.215	417.908	314.721	855.517	587.875	875.731	417.281	773.041	0.8895	0.213104
aly-miR164a-5p	96.6819	36.2319	28.5146	145.393	122.067	69.7136	53.8095	112.391	1.0626	0.219211
mtr-miR156c-3p	1.9703	1.1167	0	4.9018	6.2205	6.5281	1.029	5.8835	2.5154	0.224713
gma-miR164b	13.6564	5.3976	4.3677	22.137	15.6724	10.4772	7.8072	16.0955	1.0438	0.230427
aly-miR165a-3p	947.591	386.081	170.339	2170.77	1156.85	3188.53	501.337	2172.05	2.1152	0.230903
aly-miR171b-3p	5.7072	1.1167	0.6863	6.1667	3.3122	1.3701	2.5034	3.6163	0.5306	0.245067
csi-miR472	2.6497	1.7992	2.1838	4.2693	3.9585	4.6744	2.2109	4.3007	0.9599	0.246314
gra-miR482	2.1742	0.6825	0	4.1902	3.8777	4.6744	0.9522	4.2474	2.1572	0.250124
mtr-miR5205c	6.7263	4.8392	3.2445	11.3848	10.5021	9.4295	4.9367	10.4388	1.0803	0.268029
ahy-miR156b-5p	4.756	0.6204	0	8.2223	8.7248	5.0774	1.7921	7.3415	2.0344	0.272434
ahy-miR156a	12.977	1.2408	0	17.8677	24.7203	15.9576	4.7393	19.5152	2.0419	0.302978
mtr-miR5295a	9.1722	3.4123	2.1838	11.1476	13.2488	6.9311	4.9228	10.4425	1.0849	0.308569
mtr-miR5281b	31.8649	19.5429	14.5381	120.093	87.9753	125.323	21.982	111.131	2.3379	0.31195
mtr-miR7696a-3p	1.8344	0	0.6863	7.9061	5.0895	4.9968	0.8402	5.9975	2.8356	0.31954
mtr-miR2118	887.87	432.984	238.474	721.509	1116.7	1098.57	519.776	978.926	0.9133	0.337153
gma-miR4403	5.2995	2.1094	1.4975	7.1945	7.1899	4.9162	2.9688	6.4335	1.1157	0.364341
mtr-miR2603	35.6697	15.4482	9.5465	52.4173	59.2157	29.0137	20.2215	46.8822	1.2132	0.367382
gma-miR162a	15.7626	2.1094	0	25.3785	31.1832	14.2651	5.9573	23.6089	1.9866	0.370071
aly-miR165b-3p	4.3483	1.489	0.8111	7.5108	6.6244	9.1071	2.2161	7.7474	1.8057	0.370334
gma-miR168b	4.9598	2.7918	1.6223	18.8165	10.4213	10.9607	3.1246	13.3995	2.1004	0.388231
bdi-miR5049-5p	3.9407	1.7992	2.059	7.748	6.4628	4.3521	2.5996	6.1876	1.2511	0.389856
ahy-miR159	2936.53	773.589	287.267	4112.19	5199.67	2610.59	1332.46	3974.15	1.5766	0.400465
atr-miR171b	4.4162	1.6131	0.8735	9.4873	11.0676	4.4327	2.3009	8.3292	1.856	0.40915
vvi-miR396b	218.231	23.6376	7.425	250.227	333.401	130.159	83.0977	237.929	1.5177	0.409738
mtr-miR5273	2.378	1.8612	0.9359	5.3761	4.6048	2.579	1.725	4.1866	1.2792	0.416733
cpa-miR8155	51.4323	8.4996	6.0523	133.455	76.019	24.0169	21.9947	77.8302	1.8232	0.418556
gma-miR396b-3p	1.4947	1.6131	0.7487	3.0834	4.6048	1.7731	1.2855	3.1538	1.2948	0.425673
aly-miR166a-3p	5435.99	2672.35	1270.86	11734.8	9847.9	12162.8	3126.4	11248.5	1.8472	0.429129
mtr-miR2629h	5.2316	1.2408	0	7.1155	11.9562	4.3521	2.1575	7.8079	1.8556	0.444986
mtr-miR2087-3p	0.9512	0	0.8735	1.4231	1.6965	0	0.6082	1.0399	0.7738	0.450454
gma-miR166u	63.7299	20.7217	7.4874	107.76	95.5691	67.5376	30.6463	90.2889	1.5588	0.452229
mtr-miR2592bm-5p	1.2909	0.7445	0	1.8975	2.262	3.5461	0.6785	2.5685	1.9205	0.452785
mtr-miR2592ap	3.9407	1.6131	0	3.874	16.6418	3.6267	1.8513	8.0475	2.12	0.453677
ghr-miR156c	10.9387	1.2408	0	9.2501	17.2073	11.0413	4.0598	12.4996	1.6224	0.462562
aau-miR162	134.798	20.8458	7.7994	190.378	171.507	86.1547	54.4809	149.347	1.4548	0.467191
aly-miR390a-5p	51.0247	19.4188	7.3626	118.749	71.899	57.4633	25.9354	82.7039	1.673	0.467195
mtr-miR1510a-5p	505.558	208.458	160.355	1271.38	1057.88	954.955	291.457	1094.74	1.9092	0.483352
zma-miR171b-3p	2.4459	0.7445	0	4.0321	5.8165	1.4507	1.0635	3.7664	1.8244	0.508252
ata-miR166c-5p	3.1933	1.489	0	11.0685	5.3318	2.579	1.5608	6.3264	2.0191	0.510559
gma-miR319f	615.761	161.12	105.947	1081.87	877.572	659.821	294.276	873.087	1.569	0.512895
mtr-miR2587a	4.2124	1.0547	0	4.9808	7.7554	3.8685	1.7557	5.5349	1.6565	0.515307
gma-miR1510b-3p	18.4124	0.9306	0	18.8165	30.3753	8.6235	6.4477	19.2718	1.5796	0.51585
ahy-miR167-5p	180.047	32.6956	14.5381	341.464	235.974	85.6711	75.7603	221.036	1.5448	0.53512
atr-miR166b	265.79	123.462	54.2837	414.041	354.971	277.001	147.845	348.671	1.2378	0.5558
cme-miR166i	9.8516	5.4596	1.9342	21.1092	18.2575	17.4082	5.7485	18.925	1.719	0.577607
aau-miR396	448.011	73.7047	29.7001	408.744	367.977	131.61	183.805	302.777	0.7201	0.578188
ata-miR2118c-3p	0.6794	1.0547	0.624	2.609	2.5851	1.6119	0.786	2.2687	1.5293	0.580795
mtr-miR5287a	64.6811	31.6409	21.2143	146.183	136.689	142.328	39.1788	141.734	1.855	0.583112
aau-miR168	2.378	0.8065	0.7487	4.5855	4.1201	5.3192	1.3111	4.6749	1.8342	0.589442
bdi-miR7767-5p	1.223	0.8686	0	1.7393	0	0.8059	0.6972	0.8484	0.2832	0.592098
aly-miR399b-3p	3.8048	2.5437	0	7.1155	14.6222	3.7073	2.1162	8.4817	2.0029	0.602615
aau-miR319	684.179	125.137	36.002	886.746	950.682	358.723	281.772	732.05	1.3774	0.602778
aly-miR396b-5p	958.53	170.179	59.3377	1025.1	1447.43	563.108	396.015	1011.88	1.3534	0.611307
mtr-miR1507-3p	68.4858	11.1674	4.3053	46.1715	63.8204	28.1272	27.9862	46.0397	0.7182	0.633726
mtr-miR166e-5p	28.9434	11.9119	4.9292	62.8533	50.1677	27.966	15.2615	46.9957	1.6226	0.642927
gma-miR9749	2.8536	1.1788	0.9359	4.5065	5.9781	6.7699	1.6561	5.7515	1.7961	0.651239
mtr-miR5286a	4.2124	2.1094	1.3103	8.4595	7.2707	4.5132	2.544	6.7478	1.4073	0.65764
gma-miR166i-5p	6.4545	1.3029	0	7.5108	5.4126	6.3669	2.5858	6.4301	1.3142	0.659155
bdi-miR159a-3p	16.9176	3.4743	1.6223	17.2353	17.3689	8.14	7.3381	14.2481	0.9573	0.659477
aly-miR166f-5p	2.7856	0.6825	0	4.4274	3.9585	1.2089	1.156	3.1983	1.4682	0.672493
pta-miR159a	20.5186	2.2955	0.9359	12.966	16.3186	6.5281	7.9167	11.9376	0.5925	0.673468
aly-miR167d-5p	30.9137	3.2882	1.5599	35.8936	14.4606	4.6744	11.9206	18.3429	0.6218	0.673883
mtr-miR5290	3.1253	1.1167	0	3.953	6.0589	2.3372	1.414	4.1164	1.5416	0.679657
zma-miR399e-5p	0.8832	0.9927	0	1.8184	3.4738	1.7731	0.6253	2.3551	1.9132	0.681511
mtr-miR5286b	4.8918	1.9853	0.9359	7.1155	6.5436	4.8356	2.6043	6.1649	1.2432	0.683642
cme-miR156e	12.8411	1.9233	0.6863	15.4169	14.4606	7.1728	5.1502	12.3501	1.2618	0.685059
gma-miR1527	3.6009	0.9927	0	4.5065	5.9781	2.0148	1.5312	4.1665	1.4442	0.696479
mtr-miR5249	4.2804	1.4269	1.3103	5.6133	6.6244	5.158	2.3392	5.7986	1.3097	0.699224
bna-miR169m	4.1445	1.1788	0	2.1346	4.8471	0.8059	1.7744	2.5959	0.5489	0.712268
mtr-miR4414b	2.378	0.6204	0	1.9765	1.4541	0.8059	0.9995	1.4122	0.4987	0.716348
bdi-miR166e-3p	20.2468	10.8572	6.8011	37.9492	35.384	29.7391	12.635	34.3574	1.4432	0.719364
gma-miR482c-3p	3.8048	1.7992	0.9359	4.3483	6.4628	5.0774	2.18	5.2962	1.2806	0.720183
ahy-miR394	43.551	5.5216	2.4334	43.5625	50.4909	23.0498	17.1687	39.0344	1.185	0.7284
pab-miR396a	36.1453	4.4049	0.7487	33.759	41.9276	15.071	13.7663	30.2525	1.1359	0.738774
aly-miR396a-3p	51.0247	8.0653	2.8702	51.1523	72.3837	22.0021	20.6534	48.5127	1.232	0.76649
mtr-miR166d	4.4842	2.2335	1.3727	6.4039	3.393	9.0265	2.6968	6.2745	1.2183	0.771042
cme-miR396e	4.4842	0.8686	0	3.3206	3.2314	1.1283	1.7843	2.5601	0.5208	0.773118
gma-miR1507b	3.8727	0.6825	0	3.953	4.524	1.8537	1.5184	3.4436	1.1814	0.777793
aqc-miR166c	378.235	160.438	63.8926	737.4	648.949	364.526	200.855	583.625	1.5389	0.781823
bna-miR167d	30.1664	4.9012	1.7471	35.9727	40.7158	11.2025	12.2716	29.297	1.2554	0.785555
cme-miR168	18.0726	6.8866	3.4941	48.7015	19.7924	18.2142	9.4844	28.9027	1.6076	0.787412
gma-miR1511	562.698	111.364	106.633	910.069	801.795	184.801	260.232	632.222	1.2806	0.789425
ata-miR167b-5p	174.68	31.2687	20.0288	175.357	222.321	77.0476	75.3257	158.242	1.0709	0.789883
aqc-miR159	11.822	2.6057	1.5599	15.0216	17.6112	8.7847	5.3292	13.8058	1.3733	0.790643
aly-miR168a-5p	132.08	68.3692	48.481	341.701	282.264	238.799	82.9767	287.588	1.7932	0.79122
mtr-miR2614	9.1722	3.4743	1.6223	17.7096	15.7531	8.14	4.7563	13.8676	1.5438	0.79689
mtr-miR2661	29.0793	19.3568	1.8095	22.5323	83.936	9.2683	16.7485	38.5789	1.2038	0.799334
mtr-miR5214-3p	44.9098	15.138	4.9916	69.8107	69.7986	33.2046	21.6798	57.6046	1.4098	0.801566
mtr-miR2664a	0.8153	0.6204	0	1.0278	0.8886	0.8059	0.4786	0.9074	0.9229	0.818447
gma-miR408d	0.8153	2.1714	0	4.5855	5.4126	2.3372	0.9956	4.1118	2.0461	0.821563
gso-miR2218	1.223	0	0.6863	1.1859	2.1812	1.6119	0.6364	1.6597	1.3829	0.822411
bdi-miR5174e-3p.2	6.5225	3.4743	2.683	13.1241	13.168	10.9607	4.2266	12.4176	1.5548	0.825362
bdi-miR159b-3p.1	224.481	22.4588	4.6796	352.453	132.407	49.4846	83.8732	178.115	1.0865	0.832571
ahy-miR408-3p	15.287	31.8891	2.683	55.5007	110.191	32.0763	16.6197	65.9228	1.9879	0.834074
csi-miR171a	26.3616	4.9012	3.1198	32.3359	27.7902	14.1845	11.4609	24.7702	1.1119	0.839536
mtr-miR2592bo-5p	62.7107	37.5348	6.1147	62.6952	183.06	61.493	35.4534	102.416	1.5304	0.856412
aqc-miR398b	28.1281	141.081	6.7387	141.044	313.528	107.27	58.6494	187.281	1.675	0.857206
gma-miR159d	13.5885	1.6751	0	10.5941	12.9257	6.0445	5.0879	9.8548	0.9538	0.861223
bdi-miR160f	22.8286	8.3755	5.1164	41.1116	24.3972	27.3213	12.1068	30.9434	1.3538	0.864084
hvu-miR1436	1.5627	0.8065	0.8735	3.3206	2.5043	3.7879	1.0809	3.2043	1.5678	0.867491
mtr-miR5284a	12.5014	4.0327	2.7454	16.6028	21.085	12.2502	6.4265	16.646	1.3731	0.879257
aly-miR159c-3p	13.3846	3.1641	0.8735	13.9147	21.085	6.2863	5.8074	13.762	1.2447	0.886648
cln-miR166	1.8344	0.9927	0	2.3718	1.2926	1.6925	0.9424	1.7856	0.922	0.887852
aly-miR164c-5p	16.9856	2.8539	0.8735	34.6286	4.6856	1.6925	6.9043	13.6689	0.9853	0.895914
ahy-miR398	21.4018	30.276	1.3103	38.0283	84.9054	45.1325	17.6627	56.0221	1.6653	0.898738
gma-miR4414-3p	1.8344	0.8065	0	2.8462	2.5851	1.0477	0.8803	2.1597	1.2948	0.904383
ath-miR829-3p.1	5.1636	0.7445	0	2.7671	4.1201	1.9342	1.9694	2.9405	0.5783	0.905045
mtr-miR5269b	3.4651	0	0.6863	4.8227	4.6856	1.8537	1.3838	3.7873	1.4525	0.907534
mtr-miR5205a	2.1742	0.6204	1.0607	4.4274	4.6856	2.9014	1.2851	4.0048	1.6398	0.90868
mtr-miR5287b	15.9664	8.3135	5.5532	31.229	32.7181	30.3032	9.9444	31.4168	1.6596	0.91469
mtr-miR2655a	1.9703	0.9927	0	2.7671	2.7467	1.6925	0.9877	2.4021	1.2822	0.918188
mtr-miR399b	4.3483	1.3649	0	2.1346	8.5632	2.0954	1.9044	4.2644	1.163	0.919597
mtr-miR2592a-3p	2.0383	0.6204	0	0	2.1004	1.8537	0.8862	1.318	0.5726	0.924899
mtr-miR2586a	9.9196	2.9159	1.6847	12.5707	14.0567	10.5578	4.8401	12.3951	1.3567	0.938003
ssp-miR1128	3.7368	1.551	1.4975	7.1945	6.4628	7.737	2.2618	7.1314	1.6567	0.944641
cca-miR6118-3p	1.223	0.6204	0	1.0278	1.4541	1.2089	0.6145	1.2303	1.0015	0.963876
gma-miR1507a	11.8899	2.4196	0	10.357	10.5021	5.8027	4.7698	8.8873	0.8978	0.964099
nta-miR482a	260.219	69.7341	32.3207	219.789	384.135	223.486	120.758	275.803	1.1915	0.96447
mtr-miR5239	399.501	40.4507	15.9108	302.803	460.557	83.1727	151.954	282.178	0.893	0.966807
gma-miR2118a-3p	428.24	116.513	52.4119	454.125	472.19	420.055	199.055	448.79	1.1729	0.981702
gma-miR4414-5p	6.1827	0.8686	0	6.483	4.2816	1.4507	2.3504	4.0718	0.7928	0.989514
ata-miR167f-5p	10.8028	1.2408	0.8735	11.3848	11.4715	4.0297	4.3057	8.962	1.0576	0.990975
ppe-miR396a	26.3616	3.9706	0.8735	20.8721	30.5369	8.7041	10.4019	20.0377	0.9459	1
gma-miR482b-3p	0.6794	0.9306	0	1.9765	0.9694	1.2895	0.5367	1.4118	1.3953	1
aly-miR396b-3p	0.8832	0.8065	0	1.6603	1.6157	0.8865	0.5632	1.3875	1.3008	1
mtr-miR5205b	2.2421	1.3649	1.3103	6.7202	3.8777	6.2057	1.6391	5.6012	1.7728	1
