# Supplementary material for: Identification of Drought-Responsive microRNAs from Roots and Leaves of Alfalfa by High-Throughput Sequencing
Source: Preprints.org preprint supplement (doi:10.20944/preprints201702.0085.v1), 2017-02-23
Supplement: Supplementary file 7 [file Table S6. Targets of drought-responsive miRNAs from leaves of alfalfa..xlsx]

## Sheet: Sheet1
miRNA_Acc.	Target_Acc.	Expectation	UPE	miRNA_start	miRNA_end	Target_start	Target_end	miRNA_aligned_fragment	Target_aligned_fragment	Inhibition	Target_Desc.
han-miR3630-3p	Medtr0168s0060.1	2.5	18.131	1	22	35	56	UGUGGGAAUCUCUCUGAUGCUU	AAGCAUUGGGGAAAUUCCCACA	Translation	| zein-binding protein | HC | scaffold0168:18855-21061 | 20130731
han-miR3630-3p	Medtr3g080850.1	3	21.117	1	22	896	917	UGUGGGAAUCUCUCUGAUGCUU	AACUGUCAGAGAGAAUCCCACA	Cleavage	| cystathionine beta-lyase/cystathionine gamma-synthase | HC | chr3:36595799-36593497 | 20130731
han-miR3630-3p	Medtr0021s0360.1	3	16.348	1	21	3893	3913	UGUGGGAAUCUCUCUGAUGCU	AGCAUCAGAGAGAGUUCUACU	Cleavage	| phospholipid-transporting ATPase-like protein | HC | scaffold0021:150075-156472 | 20130731
han-miR3630-3p	Medtr1g082475.1	3	19.959	1	20	178	197	UGUGGGAAUCUCUCUGAUGC	CCAUCAAAGAGGUUCUCACA	Cleavage	| hypothetical protein | LC | chr1:36670495-36671688 | 20130731
han-miR3630-3p	Medtr1g015620.1	3	17.658	1	21	1832	1852	UGUGGGAAUCUCUCUGAUGCU	GGCAUCGGAAAGGUUUUCACA	Cleavage	| myosin heavy chain | HC | chr1:3948600-3971342 | 20130731
han-miR3630-3p	Medtr2g039770.1	3	17.546	1	20	1184	1203	UGUGGGAAUCUCUCUGAUGC	GAAUUGGAGAGAUUCUUACA	Cleavage	| disease resistance protein (TIR-NBS-LRR class) | LC | chr2:17437701-17443829 | 20130731
hbr-miR6173	Medtr8g040260.1	2	19.756	1	20	110	129	AGCCGUAAACGAUGGAUACU	UUUAUCCAUCGUUUACGGCU	Cleavage	| hypothetical protein | HC | chr8:15005757-15006760 | 20130731
hbr-miR6173	Medtr8g009970.1	3	15.514	1	20	593	612	AGCCGUAAACGAUGGAUACU	AGUAUCUAUUGUUUGCAGCU	Cleavage	| splicing factor 3A subunit 2 | HC | chr8:2491922-2495853 | 20130731
hbr-miR6173	Medtr5g075300.1	3	20.183	1	20	430	449	AGCCGUAAACGAUGGAUACU	GGUAUCCAUCGUUUCUGGUU	Cleavage	| polyol/monosaccharide transporter 1 | HC | chr5:31990474-31987994 | 20130731
ahy-miR3512	Medtr8g063940.1	2	21.778	1	20	980	999	CGCAAAUGAUGACAAAUAGA	UCUGUUUGCCGUCAUUUGCG	Cleavage	| spermidine synthase | HC | chr8:26823287-26817588 | 20130731
ahy-miR3512	Medtr8g098310.1	2.5	10.022	1	20	127	146	CGCAAAUGAUGACAAAUAGA	UUUAUUUGUAAUCAUUUGCU	Translation	| hypothetical protein | HC | chr8:40935526-40936533 | 20130731
ahy-miR3512	Medtr2g032720.1	3	13.321	1	20	574	593	CGCAAAUGAUGACAAAUAGA	CCUAUUUGUCAUUAUUUGGG	Cleavage	| hypothetical protein | LC | chr2:12327038-12325842 | 20130731
ahy-miR3512	Medtr3g058220.1	2.5	15.174	1	20	1732	1751	CGCAAAUGAUGACAAAUAGA	UCUGUUUAUCAUCAUUUGCC	Cleavage	| cytochrome P450 family 71 protein | HC | chr3:23026030-23023886 | 20130731
ahy-miR3512	Medtr7g028160.1	3	13.871	1	20	1624	1643	CGCAAAUGAUGACAAAUAGA	UUAAUUUGUUAUCGUUUGUG	Cleavage	| TCP family transcription factor | HC | chr7:9485316-9483450 | 20130731
ahy-miR3512	Medtr1g019940.3	3	14.979	1	20	530	549	CGCAAAUGAUGACAAAUAGA	UCUAUUUGUAAUUAUUUGAG	Translation	| patatin-like phospholipase | HC | chr1:6092305-6088083 | 20130731
ahy-miR3512	Medtr1g031910.1	3	18.645	1	20	5217	5236	CGCAAAUGAUGACAAAUAGA	UUUUUUUGUAGUCAUUUGCG	Translation	| mediator of RNA polymerase II transcription subunit 23 | HC | chr1:11217223-11235651 | 20130731
aly-miR157a-3p	Medtr8g101880.1	3	15.821	1	20	23	42	GCUCUCUAGCCUUCUGUCAU	AUCACACAAGGUUAGAGAGU	Cleavage	| ATP synthase G subunit family protein | HC | chr8:42820426-42823848 | 20130731
gma-miR319d	Medtr6g072780.2	2.5	20.019	1	20	2536	2555	UGGACUGAAGGGGAGCUCCU	AGCAGCAUCCCUUCAGUCCA	Cleavage	| NB-ARC domain protein | LC | chr6:26958986-26963696 | 20130731
mtr-miR5213-5p	Medtr3g025460.1	0	14.581	1	22	73	94	UACGUGUGUCUUCACCUCUGAA	UUCAGAGGUGAAGACACACGUA	Cleavage	| neutral/alkaline invertase | LC | chr3:7789087-7788384 | 20130731
mtr-miR5213-5p	Medtr4g014580.1	1.5	13.061	1	22	121	142	UACGUGUGUCUUCACCUCUGAA	UUCAGAGGCGAAGAUACACGUA	Cleavage	| TIR-NBS-LRR class disease resistance protein | LC | chr4:4137595-4131061 | 20130731
mtr-miR5213-5p	Medtr6g088260.3	3	19.006	1	22	182	203	UACGUGUGUCUUCACCUCUGAA	UUCAGAGGUGAAGACACUCGCA	Cleavage	| disease resistance protein (TIR-NBS-LRR class) | LC | chr6:33412973-33407187 | 20130731
mtr-miR5213-5p	Medtr6g088260.2	3	19.006	1	22	182	203	UACGUGUGUCUUCACCUCUGAA	UUCAGAGGUGAAGACACUCGCA	Cleavage	| disease resistance protein (TIR-NBS-LRR class) | LC | chr6:33412973-33407320 | 20130731
mtr-miR5213-5p	Medtr6g088260.1	3	19.006	1	22	182	203	UACGUGUGUCUUCACCUCUGAA	UUCAGAGGUGAAGACACUCGCA	Cleavage	| disease resistance protein (TIR-NBS-LRR class) | LC | chr6:33412973-33407320 | 20130731
mtr-miR5213-5p	Medtr6g087260.1	3	19.948	1	22	208	229	UACGUGUGUCUUCACCUCUGAA	UUCAGAGGUGAAGACACUCGCA	Cleavage	| disease resistance protein (TIR-NBS-LRR class) | LC | chr6:33307567-33303323 | 20130731
mtr-miR5213-5p	Medtr0468s0010.1	3	19.326	1	22	73	94	UACGUGUGUCUUCACCUCUGAA	UUCAGAGGUGAAGACACCCGCA	Cleavage	| disease resistance protein (TIR-NBS-LRR class) | LC | scaffold0468:9246-2684 | 20130731
mtr-miR5213-5p	Medtr6g084370.1	3	10.599	1	22	79	100	UACGUGUGUCUUCACCUCUGAA	UUCAGAGGUGAAGACACUCGCA	Cleavage	| disease resistance protein (TIR-NBS-LRR class) | LC | chr6:31566252-31567625 | 20130731
mtr-miR5213-5p	Medtr8g018170.1	3	15.48	1	22	321	342	UACGUGUGUCUUCACCUCUGAA	UUUAGGGGAGAGGAUACACGUA	Cleavage	| disease resistance protein (TIR-NBS-LRR class), putative | LC | chr8:6146125-6135140 | 20130731
mtr-miR5213-5p	Medtr8g018260.1	3	21.086	1	22	156	177	UACGUGUGUCUUCACCUCUGAA	UUUAGGGGAGAGGAUACACGUA	Cleavage	| disease resistance protein (TIR-NBS-LRR class) | HC | chr8:6180220-6173163 | 20130731
mtr-miR5213-5p	Medtr8g018270.1	3	16.74	1	22	548	569	UACGUGUGUCUUCACCUCUGAA	UUUAGGGGAGAGGAUACACGUA	Cleavage	| NB-ARC domain protein | LC | chr8:6189386-6183460 | 20130731
mtr-miR5213-5p	Medtr3g022930.1	3	15.769	1	22	269	290	UACGUGUGUCUUCACCUCUGAA	UUCAGAGGGGAAGACACGCGAA	Cleavage	| disease resistance protein (TIR-NBS-LRR class) | LC | chr3:6910032-6903260 | 20130731
mtr-miR5213-5p	Medtr8g020430.1	3	18.39	1	22	55	76	UACGUGUGUCUUCACCUCUGAA	UUCAGAGGGGAAGAUACUCGUA	Cleavage	| disease resistance protein (TIR-NBS-LRR class) | LC | chr8:7167467-7163691 | 20130731
mtr-miR5213-5p	Medtr1g115245.1	2.5	21.736	1	20	166	185	UACGUGUGUCUUCACCUCUG	CAGAGGUGGAGGUACAUGUG	Cleavage	| F-box/RNI superfamily protein | LC | chr1:51939872-51938946 | 20130731
mtr-miR5213-5p	Medtr6g088465.1	3	20.204	1	22	216	237	UACGUGUGUCUUCACCUCUGAA	UACAGAGGUGAAGACACUCGCA	Cleavage	| disease resistance protein (TIR-NBS-LRR class) | LC | chr6:33641608-33645391 | 20130731
mtr-miR5213-5p	Medtr8g105820.1	2.5	22.12	1	22	79	100	UACGUGUGUCUUCACCUCUGAA	UAUAGAGGGGAGGACACACGUG	Cleavage	| disease resistance protein (TIR-NBS-LRR class) | HC | chr8:44645576-44640926 | 20130731
mtr-miR5213-5p	Medtr4g081250.1	3	15.371	1	22	43	64	UACGUGUGUCUUCACCUCUGAA	UUCUGUGGUGAUGACACACGUA	Translation	| disease resistance protein (TIR-NBS-LRR class) | HC | chr4:31482016-31485381 | 20130731
mtr-miR5213-5p	Medtr1g090683.1	3	20.086	1	21	1854	1874	UACGUGUGUCUUCACCUCUGA	UCAGAUUUGAAGACACAUGUG	Cleavage	| DUF594 family protein | HC | chr1:40646016-40643432 | 20130731
mtr-miR5294a	Medtr7g101060.1	3	15.86	1	24	159	183	GCUAAACGGA-AUGAGGGUAGUCAU	AGGACUACCCUCAUCUCCGUUUAGG	Translation	| hypothetical protein | LC | chr7:40773377-40770444 | 20130731
mtr-miR5294a	Medtr3g013770.1	3	16.97	1	20	515	534	GCUAAACGGAAUGAGGGUAG	CUACUCUCAUGACGUUUGGC	Translation	| F-box and associated interaction domain protein | LC | chr3:3753691-3754869 | 20130731
gma-miR319q	Medtr8g042410.1	2.5	13.354	1	20	1186	1205	UGGACUGAAGGGAGCUCCUU	GAGGAGCUUCCUUCAAUCCA	Cleavage	| myb transcription factor | HC | chr8:16337360-16332955 | 20130731
gma-miR319q	Medtr8g099840.3	3	19.466	1	20	1075	1094	UGGACUGAAGGGAGCUCCUU	AAGGUGCUUCCUUUGGUUCA	Cleavage	| CAZy family GT29 glycosyltransferase | HC | chr8:40330342-40335210 | 20130731
gma-miR319q	Medtr7g070280.1	2.5	15.753	1	20	2315	2334	UGGACUGAAGGGAGCUCCUU	AUGGAGCUUCCUGCAGUCCA	Cleavage	| ARM repeat protein | HC | chr7:25934408-25940277 | 20130731
gma-miR319q	Medtr4g109190.1	3	20.521	1	20	1299	1318	UGGACUGAAGGGAGCUCCUU	AAGGAGGUCCCUUCACUUCA	Cleavage	| DUF863 family protein | HC | chr4:45305882-45310371 | 20130731
gma-miR319q	Medtr2g078200.1	3	16.646	1	20	1114	1133	UGGACUGAAGGGAGCUCCUU	GAGGGGACCCCUUCAGUCCA	Cleavage	| TCP family transcription factor | HC | chr2:32505911-32507609 | 20130731
gma-miR319q	Medtr8g463380.1	3	17.431	1	20	2126	2145	UGGACUGAAGGGAGCUCCUU	GAGGGGACCCCUUCAGUCCA	Cleavage	| TCP family transcription factor | HC | chr8:22326723-22329800 | 20130731
gma-miR319q	Medtr1g090740.1	3	20.304	1	20	1285	1304	UGGACUGAAGGGAGCUCCUU	AAGGAACUCCAAUCAGUCCA	Translation	| acyl-CoA-binding domain protein | HC | chr1:40764346-40758666 | 20130731
gma-miR319q	Medtr1g090740.2	3	20.304	1	20	1285	1304	UGGACUGAAGGGAGCUCCUU	AAGGAACUCCAAUCAGUCCA	Translation	| acyl-CoA-binding domain protein | HC | chr1:40764346-40758666 | 20130731
gma-miR319q	Medtr1g090740.3	3	20.304	1	20	1285	1304	UGGACUGAAGGGAGCUCCUU	AAGGAACUCCAAUCAGUCCA	Translation	| acyl-CoA-binding domain protein | HC | chr1:40764346-40758666 | 20130731
mtr-miR156g-3p	Medtr4g056140.1	2.5	21.364	1	21	1873	1893	GCUCUCUAGACUUCUGUCAUC	GAAGGGAGAAGUCUAGAGAGC	Cleavage	| phosphatidylcholine-sterol acyltransferase | HC | chr4:20518886-20524054 | 20130731
mtr-miR156g-3p	Medtr6g007703.1	3	17.365	1	21	331	351	GCUCUCUAGACUUCUGUCAUC	GAUGGUAGAAAUCAAGAGAGC	Translation	| glycoside hydrolase family 81 protein | HC | chr6:1826663-1828455 | 20130731
mtr-miR156g-3p	Medtr3g055990.1	3	19.802	1	21	952	972	GCUCUCUAGACUUCUGUCAUC	GAUGGUUGAAGUCAAGAGAGC	Cleavage	| heterogeneous nuclear ribonucleoprotein 27C, putative | HC | chr3:22254761-22250364 | 20130731
mtr-miR156g-3p	Medtr3g055990.2	3	19.802	1	21	952	972	GCUCUCUAGACUUCUGUCAUC	GAUGGUUGAAGUCAAGAGAGC	Cleavage	| heterogeneous nuclear ribonucleoprotein 27C, putative | HC | chr3:22254761-22251454 | 20130731
lus-miR159b	Medtr2g090105.1	2	11.641	1	20	439	458	UUUGGAUUGAAGGGAGCUCU	UUAGCUCCCUUCAAUCCAAA	Cleavage	| hypothetical protein | HC | chr2:38177532-38176202 | 20130731
lus-miR159b	Medtr8g042410.1	2	13.169	1	20	1188	1207	UUUGGAUUGAAGGGAGCUCU	GGAGCUUCCUUCAAUCCAAU	Cleavage	| myb transcription factor | HC | chr8:16337360-16332955 | 20130731
lus-miR159b	Medtr4g048110.1	1.5	11.082	1	20	663	682	UUUGGAUUGAAGGGAGCUCU	AGAGCCCUCUUCAAUCCAAA	Cleavage	| hypothetical protein | HC | chr4:16995132-16991367 | 20130731
lus-miR159b	Medtr2g015330.1	1.5	7.773	1	20	717	736	UUUGGAUUGAAGGGAGCUCU	AGAGUCCCCUUCAAUCCAAA	Cleavage	| hypothetical protein | HC | chr2:4528863-4526362 | 20130731
lus-miR159b	Medtr8g463650.3	2.5	8.388	1	21	1778	1798	UUUGGAUUGAAGGGAGCUCUC	GAAAGCUUCCUUUGAUCCAAA	Cleavage	| P-loop nucleoside triphosphate hydrolase superfamily protein | HC | chr8:22439807-22444703 | 20130731
lus-miR159b	Medtr8g006470.1	2	18.036	1	20	104	123	UUUGGAUUGAAGGGAGCUCU	GGAGCUCCAUUCGAUCCAAA	Cleavage	| myb transcription factor | HC | chr8:573793-571945 | 20130731
lus-miR159b	Medtr4g029540.1	2	21.199	1	20	104	123	UUUGGAUUGAAGGGAGCUCU	GGAGCUCCAUUCGAUCCAAA	Cleavage	| myb transcription factor | HC | chr4:10213682-10211682 | 20130731
lus-miR159b	Medtr0637s0010.1	2.5	21.835	1	21	1070	1090	UUUGGAUUGAAGGGAGCUCUC	GAGGGCAACCUUCAAUCCAAA	Cleavage	| bromodomain protein, putative | LC | scaffold0637:6098-2834 | 20130731
lus-miR159b	Medtr3g011610.1	3	19.505	1	20	1232	1251	UUUGGAUUGAAGGGAGCUCU	GGAGCUCCCUUCACUCCAAU	Cleavage	| myb transcription factor | HC | chr3:2911993-2917319 | 20130731
lus-miR159b	Medtr2g081240.1	3	13.913	1	20	435	455	UUUGG-AUUGAAGGGAGCUCU	AGAGCUCUCUUCAAUGCCAAA	Cleavage	| hypothetical protein | LC | chr2:34095177-34096920 | 20130731
lus-miR159b	Medtr4g114410.3	3	24.764	1	20	127	146	UUUGGAUUGAAGGGAGCUCU	GGAGUUUUGUUCAAUCCAAA	Cleavage	| DUF3119 family protein | HC | chr4:47039689-47036633 | 20130731
lus-miR159b	Medtr4g114410.2	3	24.764	1	20	127	146	UUUGGAUUGAAGGGAGCUCU	GGAGUUUUGUUCAAUCCAAA	Cleavage	| DUF3119 family protein | HC | chr4:47039689-47036633 | 20130731
lus-miR159b	Medtr4g114410.1	3	24.764	1	20	127	146	UUUGGAUUGAAGGGAGCUCU	GGAGUUUUGUUCAAUCCAAA	Cleavage	| DUF3119 family protein | HC | chr4:47039689-47036633 | 20130731
lus-miR159b	Medtr1g058000.1	3	21.207	1	20	268	287	UUUGGAUUGAAGGGAGCUCU	AGACUUUUCUUCGAUCCAAA	Cleavage	| ovate transcriptional repressor | LC | chr1:25531592-25530909 | 20130731
lus-miR159b	Medtr2g103420.1	3	11.17	1	20	817	836	UUUGGAUUGAAGGGAGCUCU	GGAGCUGCCUUUGAUUCAAA	Cleavage	| peptide deformylase 1A | LC | chr2:44525698-44524200 | 20130731
lus-miR159b	Medtr2g096530.1	3	12.835	1	20	1729	1748	UUUGGAUUGAAGGGAGCUCU	AUGGCUUUCUUCAAUCUAAA	Cleavage	| alpha-galactosidase | HC | chr2:41231194-41227244 | 20130731
lus-miR159b	Medtr3g033380.1	3	14.562	1	20	3637	3656	UUUGGAUUGAAGGGAGCUCU	AGAGCUCUCUGCAAUUUGAA	Translation	| LRR and NB-ARC domain disease resistance protein | LC | chr3:10662695-10668328 | 20130731
lus-miR159b	Medtr3g448600.1	3	16.431	1	20	90	109	UUUGGAUUGAAGGGAGCUCU	AGAGCUCCUUCAAAUUCAAA	Translation	| hypothetical protein | LC | chr3:16346650-16346231 | 20130731
lus-miR159b	Medtr6g059460.1	3	13.111	1	20	351	370	UUUGGAUUGAAGGGAGCUCU	AGAGCUCCUUCAAAUUCAAA	Translation	| hypothetical protein | HC | chr6:20416686-20415766 | 20130731
lus-miR159b	Medtr2g101330.1	3	19.402	1	20	397	416	UUUGGAUUGAAGGGAGCUCU	AGAGCUGAUUUCGAUCCAAA	Cleavage	| dihydroflavonol reductase | HC | chr2:43558464-43557156 | 20130731
lus-miR159b	Medtr2g084285.3	3	17.298	1	20	900	919	UUUGGAUUGAAGGGAGCUCU	AGAUCGCCUUUCAAUUCAAA	Cleavage	| DUF2146 family protein | HC | chr2:35485929-35478439 | 20130731
lus-miR159b	Medtr2g084285.1	3	17.298	1	20	1131	1150	UUUGGAUUGAAGGGAGCUCU	AGAUCGCCUUUCAAUUCAAA	Cleavage	| DUF2146 family protein | HC | chr2:35487185-35478439 | 20130731
lus-miR159b	Medtr2g084285.2	3	17.298	1	20	1131	1150	UUUGGAUUGAAGGGAGCUCU	AGAUCGCCUUUCAAUUCAAA	Cleavage	| DUF2146 family protein | HC | chr2:35487185-35478439 | 20130731
atr-miR319a	Medtr3g011610.1	2.5	19.227	1	20	1231	1250	UUGGACUGAAGGGAGCUCCC	UGGAGCUCCCUUCACUCCAA	Cleavage	| myb transcription factor | HC | chr3:2911993-2917319 | 20130731
atr-miR319a	Medtr8g042410.1	3	13.621	1	20	1187	1206	UUGGACUGAAGGGAGCUCCC	AGGAGCUUCCUUCAAUCCAA	Cleavage	| myb transcription factor | HC | chr8:16337360-16332955 | 20130731
atr-miR319a	Medtr1g108370.1	3	24.943	1	20	43	62	UUGGACUGAAGGGAGCUCCC	AGGGGCUCACUUCAGUCCAG	Cleavage	| hypothetical protein | HC | chr1:48980064-48979393 | 20130731
