# Supplementary material for: Identification of Drought-Responsive microRNAs from Roots and Leaves of Alfalfa by High-Throughput Sequencing
Source: Preprints.org preprint supplement (doi:10.20944/preprints201702.0085.v1), 2017-02-23
Supplement: Supplementary file 8 [file Table S7. Targets of drought-responsive miRNAs from roots of alfalfa.xlsx]

## Sheet: Sheet1
miRNA_Acc.	Target_Acc.	Expectation	UPE	miRNA_start	miRNA_end	Target_start	Target_end	miRNA_aligned_fragment	Target_aligned_fragment	Inhibition	Target_Desc.
aly-miR157a-3p	Medtr8g101880.1	3	15.821	1	20	23	42	GCUCUCUAGCCUUCUGUCAU	AUCACACAAGGUUAGAGAGU	Cleavage	| ATP synthase G subunit family protein | HC | chr8:42820426-42823848 | 20130731
atr-miR166b	Medtr2g101190.1	2	20.255	1	21	1079	1099	UCUCGGACCAGGCUUCAUUCC	GGAAUGAAGCCUGGUCCGGAA	Cleavage	| class III homeodomain leucine zipper protein | HC | chr2:43512049-43503468 | 20130731
atr-miR166b	Medtr2g086390.1	1.5	13.573	1	20	984	1003	UCUCGGACCAGGCUUCAUUC	GGAUGAAGUUUGGUCCGAGA	Cleavage	| ABA response element-binding factor | HC | chr2:36319785-36322071 | 20130731
atr-miR166b	Medtr2g086390.2	1.5	13.573	1	20	984	1003	UCUCGGACCAGGCUUCAUUC	GGAUGAAGUUUGGUCCGAGA	Cleavage	| ABA response element-binding factor | HC | chr2:36319785-36322071 | 20130731
atr-miR166b	Medtr2g030130.1	2.5	20.202	1	21	941	961	UCUCGGACCAGGCUUCAUUCC	GGGAUGAAGCCUGGUCCGGAA	Cleavage	| class III homeodomain leucine zipper protein | HC | chr2:11288103-11282650 | 20130731
atr-miR166b	Medtr2g086340.1	2	12.83	1	20	297	316	UCUCGGACCAGGCUUCAUUC	GGAUGAAGUUUGGUCUGAGA	Cleavage	| bZIP transcription factor | HC | chr2:36304919-36306544 | 20130731
mtr-miR1507-3p	Medtr7g091550.1	2	20.512	1	22	883	904	CCUCGUUCCAUACAUCAUCUAG	CUAGAUGAUGUAUGGAAUGAUG	Cleavage	| NBS-LRR disease resistance protein | LC | chr7:36216856-36222349 | 20130731
mtr-miR1507-3p	Medtr1g047910.1	2	15.597	1	22	880	901	CCUCGUUCCAUACAUCAUCUAG	UUAGAUGAUGUAUGGAAUGAUG	Cleavage	| NBS-LRR type disease resistance protein | HC | chr1:18126532-18123929 | 20130731
mtr-miR1507-3p	Medtr8g036195.1	2.5	14.756	1	22	868	889	CCUCGUUCCAUACAUCAUCUAG	CUAGAUGAUGUGUGGAAUGAAG	Cleavage	| NBS-LRR type disease resistance protein | LC | chr8:13379156-13375562 | 20130731
mtr-miR1507-3p	Medtr2g014730.1	2	13.754	1	22	881	902	CCUCGUUCCAUACAUCAUCUAG	UUGGAUGAUGUAUGGACCGAGG	Cleavage	| NB-ARC domain disease resistance protein | HC | chr2:4252897-4257728 | 20130731
mtr-miR1507-3p	Medtr7g091140.1	3	13.809	1	22	3087	3108	CCUCGUUCCAUACAUCAUCUAG	UUAGAUGAUGUAUGGAAUGAUA	Cleavage	| LRR and NB-ARC domain disease resistance protein | LC | chr7:35958946-35950571 | 20130731
mtr-miR1507-3p	Medtr4g119140.1	2	17.847	1	22	818	839	CCUCGUUCCAUACAUCAUCUAG	UUGGACGAUGUAUGGAAUGAGG	Cleavage	| NB-ARC domain disease resistance protein | HC | chr4:49339958-49344900 | 20130731
mtr-miR1507-3p	Medtr4g050790.1	2	20.308	1	22	790	811	CCUCGUUCCAUACAUCAUCUAG	UUAGAUGACGUGUGGAAUGAGG	Cleavage	| NBS-LRR type disease resistance protein | HC | chr4:18035809-18033236 | 20130731
mtr-miR1507-3p	Medtr3g015500.1	2	19.441	1	22	904	925	CCUCGUUCCAUACAUCAUCUAG	UUAGAUGACGUGUGGAAUGAGG	Cleavage	| NBS-LRR type disease resistance protein | HC | chr3:4495807-4499463 | 20130731
mtr-miR1507-3p	Medtr3g015550.1	2	20.622	1	22	901	922	CCUCGUUCCAUACAUCAUCUAG	UUAGAUGACGUGUGGAAUGAGG	Cleavage	| NBS-LRR type disease resistance protein | HC | chr3:4514544-4520904 | 20130731
mtr-miR1507-3p	Medtr7g078630.1	2	22.304	1	22	655	676	CCUCGUUCCAUACAUCAUCUAG	UUGGAUGACGUAUGGAAUGAGG	Cleavage	| cysteine proteinase superfamily protein | LC | chr7:29742896-29746999 | 20130731
mtr-miR1507-3p	Medtr4g119195.2	2	22.696	1	22	1120	1141	CCUCGUUCCAUACAUCAUCUAG	UUGGACGAUGUAUGGAAUGAGG	Cleavage	| LRR and NB-ARC domain disease resistance protein | HC | chr4:49351076-49355117 | 20130731
mtr-miR1507-3p	Medtr3g015550.3	2	20.622	1	22	982	1003	CCUCGUUCCAUACAUCAUCUAG	UUAGAUGACGUGUGGAAUGAGG	Cleavage	| NBS-LRR type disease resistance protein | HC | chr3:4516404-4521298 | 20130731
mtr-miR1507-3p	Medtr4g119195.1	2	22.696	1	22	1120	1141	CCUCGUUCCAUACAUCAUCUAG	UUGGACGAUGUAUGGAAUGAGG	Cleavage	| LRR and NB-ARC domain disease resistance protein | HC | chr4:49351076-49355117 | 20130731
mtr-miR1507-3p	Medtr6g016430.1	2	15.025	1	22	888	909	CCUCGUUCCAUACAUCAUCUAG	UUGGAUGACGUAUGGAAUGAGG	Cleavage	| NBS-LRR disease resistance protein | LC | chr6:6125934-6121797 | 20130731
mtr-miR1507-3p	Medtr5g037500.1	3	15.676	1	22	1107	1128	CCUCGUUCCAUACAUCAUCUAG	CUGGAUGAUGUAUGGGAUGAUG	Cleavage	| NB-ARC domain disease resistance protein | HC | chr5:16415833-16412122 | 20130731
mtr-miR1507-3p	Medtr3g015550.2	2	20.622	1	22	1313	1334	CCUCGUUCCAUACAUCAUCUAG	UUAGAUGACGUGUGGAAUGAGG	Cleavage	| NBS-LRR type disease resistance protein | HC | chr3:4517197-4522846 | 20130731
mtr-miR1507-3p	Medtr5g035300.1	3	11.994	1	22	826	847	CCUCGUUCCAUACAUCAUCUAG	UUGGAUGAUGUAUGGGAUGAUG	Cleavage	| NB-ARC domain disease resistance protein | HC | chr5:15358829-15357162 | 20130731
mtr-miR1507-3p	Medtr7g078300.1	2.5	20.215	1	22	853	874	CCUCGUUCCAUACAUCAUCUAG	UUGGAUGACGUGUGGAGCGAGG	Cleavage	| disease resistance protein (CC-NBS-LRR class) family protein | HC | chr7:29603559-29600998 | 20130731
mtr-miR1507-3p	Medtr7g078640.1	2.5	19.844	1	22	926	947	CCUCGUUCCAUACAUCAUCUAG	UUGGAUGACGUGUGGAGCGAGG	Cleavage	| NBS-LRR type disease resistance protein | HC | chr7:29749662-29752433 | 20130731
mtr-miR1507-3p	Medtr4g094540.1	3	16.356	1	22	854	875	CCUCGUUCCAUACAUCAUCUAG	CUAGAUGAUGUUUGGAAUGAAG	Translation	| NBS-LRR type disease resistance protein | HC | chr4:38188145-38192197 | 20130731
mtr-miR1507-3p	Medtr1g078490.1	2.5	19.354	1	22	893	914	CCUCGUUCCAUACAUCAUCUAG	UUGGACGAUGUGUGGAAUGAGG	Cleavage	| disease resistance protein (CC-NBS-LRR class) family protein | LC | chr1:35156813-35161093 | 20130731
mtr-miR1507-3p	Medtr5g035280.1	3	15.126	1	22	868	889	CCUCGUUCCAUACAUCAUCUAG	UUGGAUGAUGUGUGGGACGACG	Cleavage	| NB-ARC domain disease resistance protein | LC | chr5:15348602-15344286 | 20130731
mtr-miR1507-3p	Medtr3g015260.1	3	15.717	1	22	841	862	CCUCGUUCCAUACAUCAUCUAG	UUAGAUGAUGUCUGGAAUGGGA	Translation	| disease resistance protein (CC-NBS-LRR class) family protein | LC | chr3:4387847-4391292 | 20130731
mtr-miR1507-3p	Medtr3g015260.2	3	15.717	1	22	926	947	CCUCGUUCCAUACAUCAUCUAG	UUAGAUGAUGUCUGGAAUGGGA	Translation	| disease resistance protein (CC-NBS-LRR class) family protein | LC | chr3:4387762-4391753 | 20130731
mtr-miR1507-3p	Medtr0425s0020.1	3	20.659	1	22	841	862	CCUCGUUCCAUACAUCAUCUAG	UUAGAUGAUAUAUGGAAUGGGA	Cleavage	| LRR and NB-ARC domain disease resistance protein | LC | scaffold0425:6387-10157 | 20130731
mtr-miR1507-3p	Medtr0425s0020.2	3	20.659	1	22	841	862	CCUCGUUCCAUACAUCAUCUAG	UUAGAUGAUAUAUGGAAUGGGA	Cleavage	| LRR and NB-ARC domain disease resistance protein | LC | scaffold0425:6387-10157 | 20130731
mtr-miR1507-3p	Medtr3g022300.1	3	21.889	1	22	1330	1351	CCUCGUUCCAUACAUCAUCUAG	UUAGAUGAUAUAUGGAAUGGGA	Cleavage	| LRR and NB-ARC domain disease resistance protein | LC | chr3:6551744-6557109 | 20130731
mtr-miR1507-3p	Medtr1g047870.1	3	16.46	1	22	166	187	CCUCGUUCCAUACAUCAUCUAG	UUAGAUGAUAUAUGGAAUGAUG	Cleavage	| NB-ARC domain disease resistance protein | LC | chr1:18118165-18116271 | 20130731
mtr-miR1507-3p	Medtr5g040770.1	3	14.556	1	22	121	142	CCUCGUUCCAUACAUCAUCUAG	UUGGAUGAUUUGUGGGAUGAGG	Cleavage	| NBS-LRR type disease resistance protein | LC | chr5:17928445-17925781 | 20130731
mtr-miR1507-3p	Medtr5g076840.1	3	17.047	1	22	862	883	CCUCGUUCCAUACAUCAUCUAG	UUGGACGAUGUAUGGAACCAGG	Cleavage	| NBS-LRR type disease resistance protein | LC | chr5:32784941-32782371 | 20130731
mtr-miR1507-3p	Medtr7g091110.1	3	17.207	1	22	889	910	CCUCGUUCCAUACAUCAUCUAG	UUAGAUGACGUAUGGAAUGAUG	Cleavage	| LRR and NB-ARC domain disease resistance protein | LC | chr7:35947613-35943843 | 20130731
mtr-miR1507-3p	Medtr7g491180.1	3	18.427	1	22	973	994	CCUCGUUCCAUACAUCAUCUAG	UUAGAUGACGUAUGGAAUGAUG	Cleavage	| NBS-LRR disease resistance protein | LC | chr7:35978360-35974939 | 20130731
mtr-miR1507-3p	Medtr7g091190.1	3	18.427	1	22	974	995	CCUCGUUCCAUACAUCAUCUAG	UUAGAUGACGUAUGGAAUGAUG	Cleavage	| NBS-LRR disease resistance protein | LC | chr7:35999773-35996016 | 20130731
mtr-miR1507-3p	Medtr2g078070.1	3	17.43	1	22	966	987	CCUCGUUCCAUACAUCAUCUAG	CUUGAUGAUUUGUGGAAUGAGG	Cleavage	| NBS-LRR type disease resistance protein | HC | chr2:32407930-32411469 | 20130731
mtr-miR1507-3p	Medtr3g023320.1	3	17.683	1	22	948	969	CCUCGUUCCAUACAUCAUCUAG	UUAGAUGAUGUUUGGAAUGAAG	Translation	| disease resistance protein RGA1 | LC | chr3:7052282-7056226 | 20130731
mtr-miR1507-3p	Medtr3g023030.3	2.5	19.8	1	22	1107	1128	CCUCGUUCCAUACAUCAUCUAG	UUAGAUGAUAUCUGGAACGGGG	Translation	| LRR and NB-ARC domain disease resistance protein | LC | chr3:6950560-6944672 | 20130731
mtr-miR1507-3p	Medtr3g023030.2	2.5	19.8	1	22	1089	1110	CCUCGUUCCAUACAUCAUCUAG	UUAGAUGAUAUCUGGAACGGGG	Translation	| LRR and NB-ARC domain disease resistance protein | LC | chr3:6950564-6944739 | 20130731
mtr-miR1507-3p	Medtr3g023030.1	2.5	19.8	1	22	1093	1114	CCUCGUUCCAUACAUCAUCUAG	UUAGAUGAUAUCUGGAACGGGG	Translation	| LRR and NB-ARC domain disease resistance protein | LC | chr3:6950546-6944739 | 20130731
mtr-miR1507-3p	Medtr2g014840.1	3	15.544	1	22	1076	1097	CCUCGUUCCAUACAUCAUCUAG	UUGGAUGAUGUUUGGACCGAGG	Translation	| LRR and NB-ARC domain disease resistance protein | LC | chr2:4315783-4311787 | 20130731
mtr-miR1507-3p	Medtr8g043600.1	3	14.051	1	22	679	700	CCUCGUUCCAUACAUCAUCUAG	UUAGAUGACAUGUGGAAUGAGG	Cleavage	| NB-ARC domain disease resistance protein | LC | chr8:16750896-16749071 | 20130731
mtr-miR1507-3p	Medtr3g015560.2	3	18.401	1	22	950	971	CCUCGUUCCAUACAUCAUCUAG	UUGGAUGACAUGUGGAACGAGG	Cleavage	| NBS-LRR type disease resistance protein | HC | chr3:4527374-4534944 | 20130731
mtr-miR1507-3p	Medtr3g015560.1	3	18.401	1	22	1037	1058	CCUCGUUCCAUACAUCAUCUAG	UUGGAUGACAUGUGGAACGAGG	Cleavage	| NBS-LRR type disease resistance protein | HC | chr3:4525721-4534925 | 20130731
mtr-miR1507-3p	Medtr5g015600.1	3	15.749	1	20	1400	1419	CCUCGUUCCAUACAUCAUCU	UCAUGAUGUAUGCAACGAGG	Cleavage	| condensin-2 complex subunit G2, putative | HC | chr5:5429178-5423298 | 20130731
mtr-miR1507-3p	Medtr7g096100.2	3	18.95	1	20	702	721	CCUCGUUCCAUACAUCAUCU	AGAUGGGGUAUGGAAGGAGG	Cleavage	| phosphoribulokinase/uridine kinase family protein | HC | chr7:38538783-38536195 | 20130731
mtr-miR1507-3p	Medtr7g096100.1	3	17.743	1	20	702	721	CCUCGUUCCAUACAUCAUCU	AGAUGGGGUAUGGAAGGAGG	Cleavage	| phosphoribulokinase/uridine kinase family protein | HC | chr7:38538783-38534861 | 20130731
mtr-miR1507-3p	Medtr7g096100.3	3	17.743	1	20	702	721	CCUCGUUCCAUACAUCAUCU	AGAUGGGGUAUGGAAGGAGG	Cleavage	| phosphoribulokinase/uridine kinase family protein | HC | chr7:38538783-38534861 | 20130731
mtr-miR1507-3p	Medtr4g082940.1	3	19.237	1	20	488	507	CCUCGUUCCAUACAUCAUCU	GGGUGAUGUAUGUGACGGGG	Cleavage	| inactive purple acid phosphatase-like protein | HC | chr4:32246127-32249273 | 20130731
aqc-miR166c	Medtr2g101190.1	1.5	20.401	1	20	1078	1097	UCGGACCAGGCUUCAUUCCU	UGGAAUGAAGCCUGGUCCGG	Cleavage	| class III homeodomain leucine zipper protein | HC | chr2:43512049-43503468 | 20130731
aqc-miR166c	Medtr2g030130.1	2	19.214	1	20	940	959	UCGGACCAGGCUUCAUUCCU	UGGGAUGAAGCCUGGUCCGG	Cleavage	| class III homeodomain leucine zipper protein | HC | chr2:11288103-11282650 | 20130731
aqc-miR166c	Medtr2g094520.1	2	21.009	1	20	1449	1468	UCGGACCAGGCUUCAUUCCU	UGGGAUGAAGCCUGGUCCGG	Cleavage	| class III homeodomain leucine zipper protein | HC | chr2:40311798-40317320 | 20130731
aqc-miR166c	Medtr2g030240.2	2	16.626	1	20	928	947	UCGGACCAGGCUUCAUUCCU	AGGAGUGAAGUCUGGUUUGA	Cleavage	| 2-succinylbenzoate-CoA ligase/peroxisomal protein | HC | chr2:11343102-11346176 | 20130731
aqc-miR166c	Medtr2g030240.1	2	16.626	1	20	1210	1229	UCGGACCAGGCUUCAUUCCU	AGGAGUGAAGUCUGGUUUGA	Cleavage	| 2-succinylbenzoate-CoA ligase/peroxisomal protein | HC | chr2:11342493-11346176 | 20130731
aqc-miR166c	Medtr8g465510.1	2.5	23.825	1	20	474	493	UCGGACCAGGCUUCAUUCCU	AGGAAUGAAGCUUGGUUGGA	Cleavage	| S-locus lectin kinase family protein | LC | chr8:23357805-23362058 | 20130731
aqc-miR166c	Medtr4g066120.1	3	13.804	1	20	303	322	UCGGACCAGGCUUCAUUCCU	AGGUGUGAAGCCUGGUCCAA	Cleavage	| hypothetical protein | LC | chr4:24919185-24920047 | 20130731
aqc-miR166c	Medtr1g047290.1	3	11.307	1	20	69	88	UCGGACCAGGCUUCAUUCCU	AGGAAUGAGAAUUGGUCCGA	Translation	| hypothetical protein | LC | chr1:17854222-17854464 | 20130731
aqc-miR166c	Medtr1g047300.1	3	6.28	1	20	379	398	UCGGACCAGGCUUCAUUCCU	AGGAAUGAGAAUUGGUCCGA	Translation	| hypothetical protein | LC | chr1:17855937-17856879 | 20130731
aqc-miR166c	Medtr0098s0030.1	3	8.498	1	20	400	419	UCGGACCAGGCUUCAUUCCU	AGGAAUGAGAAUUGGUCCGA	Translation	| hypothetical protein | LC | scaffold0098:9088-11069 | 20130731
aqc-miR166c	Medtr3g009540.2	3	12.07	1	20	538	557	UCGGACCAGGCUUCAUUCCU	AGGAAUGGAUCAUGGUCUGA	Translation	| transmembrane protein, putative | HC | chr3:2097800-2103409 | 20130731
aqc-miR166c	Medtr3g009540.1	3	12.07	1	20	538	557	UCGGACCAGGCUUCAUUCCU	AGGAAUGGAUCAUGGUCUGA	Translation	| transmembrane protein, putative | HC | chr3:2097800-2103409 | 20130731
aqc-miR166a	Medtr2g030240.2	2	16.626	1	21	927	947	UCGGACCAGGCUUCAUUCCUC	GAGGAGUGAAGUCUGGUUUGA	Cleavage	| 2-succinylbenzoate-CoA ligase/peroxisomal protein | HC | chr2:11343102-11346176 | 20130731
aqc-miR166a	Medtr2g030240.1	2	16.626	1	21	1209	1229	UCGGACCAGGCUUCAUUCCUC	GAGGAGUGAAGUCUGGUUUGA	Cleavage	| 2-succinylbenzoate-CoA ligase/peroxisomal protein | HC | chr2:11342493-11346176 | 20130731
aqc-miR166a	Medtr2g101190.1	1.5	20.401	1	20	1078	1097	UCGGACCAGGCUUCAUUCCU	UGGAAUGAAGCCUGGUCCGG	Cleavage	| class III homeodomain leucine zipper protein | HC | chr2:43512049-43503468 | 20130731
aqc-miR166a	Medtr2g030130.1	2	19.214	1	20	940	959	UCGGACCAGGCUUCAUUCCU	UGGGAUGAAGCCUGGUCCGG	Cleavage	| class III homeodomain leucine zipper protein | HC | chr2:11288103-11282650 | 20130731
aqc-miR166a	Medtr2g094520.1	2	21.009	1	20	1449	1468	UCGGACCAGGCUUCAUUCCU	UGGGAUGAAGCCUGGUCCGG	Cleavage	| class III homeodomain leucine zipper protein | HC | chr2:40311798-40317320 | 20130731
aqc-miR166a	Medtr8g465510.1	2.5	23.825	1	20	474	493	UCGGACCAGGCUUCAUUCCU	AGGAAUGAAGCUUGGUUGGA	Cleavage	| S-locus lectin kinase family protein | LC | chr8:23357805-23362058 | 20130731
aqc-miR166a	Medtr4g066120.1	3	13.804	1	20	303	322	UCGGACCAGGCUUCAUUCCU	AGGUGUGAAGCCUGGUCCAA	Cleavage	| hypothetical protein | LC | chr4:24919185-24920047 | 20130731
aqc-miR166a	Medtr1g047290.1	3	11.307	1	20	69	88	UCGGACCAGGCUUCAUUCCU	AGGAAUGAGAAUUGGUCCGA	Translation	| hypothetical protein | LC | chr1:17854222-17854464 | 20130731
aqc-miR166a	Medtr1g047300.1	3	6.28	1	20	379	398	UCGGACCAGGCUUCAUUCCU	AGGAAUGAGAAUUGGUCCGA	Translation	| hypothetical protein | LC | chr1:17855937-17856879 | 20130731
aqc-miR166a	Medtr0098s0030.1	3	8.498	1	20	400	419	UCGGACCAGGCUUCAUUCCU	AGGAAUGAGAAUUGGUCCGA	Translation	| hypothetical protein | LC | scaffold0098:9088-11069 | 20130731
aqc-miR166a	Medtr3g009540.1	3	12.07	1	20	538	557	UCGGACCAGGCUUCAUUCCU	AGGAAUGGAUCAUGGUCUGA	Translation	| transmembrane protein, putative | HC | chr3:2097800-2103409 | 20130731
aqc-miR166a	Medtr3g009540.2	3	12.07	1	20	538	557	UCGGACCAGGCUUCAUUCCU	AGGAAUGGAUCAUGGUCUGA	Translation	| transmembrane protein, putative | HC | chr3:2097800-2103409 | 20130731
aau-miR396	Medtr4g094918.1	2	23.051	1	20	606	625	UUCCACAGCUUUCUUGAACU	AGAUCAAGGAAGUUGUGGAA	Cleavage	| papain family cysteine protease | HC | chr4:39283313-39286264 | 20130731
aau-miR396	Medtr4g030200.1	3	20.831	1	20	130	149	UUCCACAGCUUUCUUGAACU	UGUUCAAGAAGGCGGUGGAA	Cleavage	| eukaryotic translation initiation factor SUI1-like protein | HC | chr4:10407181-10415634 | 20130731
aau-miR396	Medtr3g052060.1	2.5	15.335	1	20	90	109	UUCCACAGCUUUCUUGAACU	AGUUCAAGAACGCUGUGCAA	Translation	| hypothetical protein | LC | chr3:20591685-20589235 | 20130731
aau-miR396	Medtr0462s0020.1	2.5	10.333	1	20	840	859	UUCCACAGCUUUCUUGAACU	AGUUCAAGAACGCUGUGCAA	Translation	| Ulp1 protease family, carboxy-terminal domain protein | LC | scaffold0462:13562-11985 | 20130731
aau-miR396	Medtr4g007080.1	2.5	15.511	1	20	941	960	UUCCACAGCUUUCUUGAACU	AGUUGAAGGAAGUUGUGGAG	Cleavage	| NDH-dependent cyclic electron flow protein | HC | chr4:940545-943387 | 20130731
aau-miR396	Medtr3g464080.1	2.5	16.743	1	20	2283	2302	UUCCACAGCUUUCUUGAACU	GGUUCAGGAGAGGUGUGGAA	Cleavage	| Serine/Threonine-kinase CCR4-like protein | HC | chr3:25742327-25739765 | 20130731
aau-miR396	Medtr4g130540.1	2.5	9.715	1	20	2092	2111	UUCCACAGCUUUCUUGAACU	AGAUUGAGAAGGCUGUGGAA	Cleavage	| heat shock 70 kDa protein | HC | chr4:54397596-54395000 | 20130731
aau-miR396	Medtr2g041430.1	2	14.079	1	21	336	357	UUCCACA-GCUUUCUUGAACUG	CCGUUCAAGAAAGCCUGUGGAA	Cleavage	| growth-regulating factor-like protein | HC | chr2:18200260-18198399 | 20130731
aau-miR396	Medtr4g125490.1	2	15.619	1	21	330	351	UUCCACA-GCUUUCUUGAACUG	CCGUUCAAGAAAGCCUGUGGAA	Cleavage	| growth-regulating factor-like protein | HC | chr4:52051634-52053330 | 20130731
aau-miR396	Medtr8g020560.1	2	16.326	1	21	472	493	UUCCACA-GCUUUCUUGAACUG	CCGUUCAAGAAAGCCUGUGGAA	Cleavage	| growth-regulating factor-like protein | HC | chr8:7247171-7245246 | 20130731
aau-miR396	Medtr7g104050.2	2	16.925	1	21	658	679	UUCCACA-GCUUUCUUGAACUG	CCGUUCAAGAAAGCCUGUGGAA	Cleavage	| growth-regulating factor | HC | chr7:42091020-42093749 | 20130731
aau-miR396	Medtr2g041430.2	2	14.079	1	21	394	415	UUCCACA-GCUUUCUUGAACUG	CCGUUCAAGAAAGCCUGUGGAA	Cleavage	| growth-regulating factor-like protein | HC | chr2:18200318-18197862 | 20130731
aau-miR396	Medtr5g027030.1	2	14.434	1	21	511	532	UUCCACA-GCUUUCUUGAACUG	CCGUUCAAGAAAGCCUGUGGAA	Cleavage	| growth-regulating factor | HC | chr5:11196291-11199598 | 20130731
aau-miR396	Medtr7g104050.1	2	16.925	1	21	658	679	UUCCACA-GCUUUCUUGAACUG	CCGUUCAAGAAAGCCUGUGGAA	Cleavage	| growth-regulating factor | HC | chr7:42091020-42093749 | 20130731
aau-miR396	Medtr0001s0490.1	2	18.686	1	21	649	670	UUCCACA-GCUUUCUUGAACUG	CCGUUCAAGAAAGCCUGUGGAA	Cleavage	| growth-regulating factor | HC | scaffold0001:397821-401891 | 20130731
aau-miR396	Medtr3g092330.1	2	13.805	1	21	588	609	UUCCACA-GCUUUCUUGAACUG	CCGUUCAAGAAAGCCUGUGGAA	Cleavage	| growth-regulating factor | HC | chr3:42182837-42185284 | 20130731
aau-miR396	Medtr2g041430.3	2	14.079	1	21	394	415	UUCCACA-GCUUUCUUGAACUG	CCGUUCAAGAAAGCCUGUGGAA	Cleavage	| growth-regulating factor-like protein | HC | chr2:18200318-18197862 | 20130731
aau-miR396	Medtr8g035910.1	2.5	15.615	1	19	410	429	UUCCAC-AGCUUUCUUGAAC	GUUCAAGAAAGCUUGUGGAA	Cleavage	| growth-regulating factor 4 | HC | chr8:13138965-13135899 | 20130731
aau-miR396	Medtr4g019670.1	3	19.593	1	20	1344	1363	UUCCACAGCUUUCUUGAACU	AGUUCAAGAAAACUUUGGAG	Translation	| MADS-box transcription factor family protein | LC | chr4:6197284-6198843 | 20130731
aau-miR396	Medtr1g017490.2	2	22.2	1	19	723	742	UUCCACA-GCUUUCUUGAAC	GUUCAAGAAAGCCUGUGGAA	Cleavage	| growth-regulating factor | HC | chr1:4901660-4905097 | 20130731
aau-miR396	Medtr1g017490.1	2	22.2	1	19	1067	1086	UUCCACA-GCUUUCUUGAAC	GUUCAAGAAAGCCUGUGGAA	Cleavage	| growth-regulating factor | HC | chr1:4900623-4905273 | 20130731
aau-miR396	Medtr8g018280.1	3	12.517	1	20	3538	3557	UUCCACAGCUUUCUUGAACU	AGUUGAAGAAGGCGGUGGAA	Cleavage	| disease resistance protein (TIR-NBS-LRR class), putative | LC | chr8:6198456-6190352 | 20130731
aau-miR396	Medtr2g058870.1	3	20.538	1	21	295	315	UUCCACAGCUUUCUUGAACUG	CAUUUCAAGAAAAAUGUGGAA	Translation	| hypothetical protein | HC | chr2:24309475-24309960 | 20130731
aau-miR396	Medtr2g091335.1	3	19.108	1	21	1756	1776	UUCCACAGCUUUCUUGAACUG	CAGCACAAGAUAGCUGUGGAA	Translation	| frigida-LIKE protein | LC | chr2:39474728-39472667 | 20130731
aau-miR396	Medtr2g104190.1	3	19.695	1	21	1768	1788	UUCCACAGCUUUCUUGAACUG	CAGCACAAGAUAGCUGUGGAA	Translation	| frigida-LIKE protein | LC | chr2:44896943-44894953 | 20130731
aau-miR396	Medtr2g091015.1	3	18.807	1	21	2548	2568	UUCCACAGCUUUCUUGAACUG	CAGCACAAGACAGCUGUGGAA	Translation	| frigida-LIKE protein | LC | chr2:39135884-39140095 | 20130731
aau-miR396	Medtr1g012600.1	3	17.429	1	20	460	479	UUCCACAGCUUUCUUGAACU	AGCUUAAGGAUGCUGUGGAA	Translation	| hypothetical protein | HC | chr1:2549497-2554775 | 20130731
aau-miR396	Medtr3g099150.1	3	19.203	1	20	141	160	UUCCACAGCUUUCUUGAACU	AGUUGAAGAAAUUUGUGGGA	Translation	| nodulin-like/MFS transporter | HC | chr3:45450834-45453582 | 20130731
aau-miR396	Medtr5g024810.1	3	16.569	1	20	1455	1474	UUCCACAGCUUUCUUGAACU	GGAUCAAGCAAGCUGUGGAG	Cleavage	| CW-type zinc finger protein | HC | chr5:10011299-9997842 | 20130731
aau-miR396	Medtr3g097460.1	3	17.454	1	20	2048	2067	UUCCACAGCUUUCUUGAACU	GGUUGAAUAAGGCUGUGGAA	Cleavage	| kinase family protein | HC | chr3:44681008-44678849 | 20130731
aau-miR396	Medtr0001s0430.1	3	20.056	1	20	1141	1160	UUCCACAGCUUUCUUGAACU	AGUUGAGGAGACCUGUGGAA	Translation	| pentatricopeptide (PPR) repeat protein | HC | scaffold0001:195705-188782 | 20130731
aau-miR396	Medtr8g011230.1	3	22.107	1	20	866	885	UUCCACAGCUUUCUUGAACU	AGUUGGAGAACGUUGUGGAA	Translation	| ATP/DNA-binding protein | HC | chr8:2953697-2945349 | 20130731
aau-miR396	Medtr2g019410.1	3	16.693	1	20	794	813	UUCCACAGCUUUCUUGAACU	AGUUCAAAAAAAAUGUGGAA	Translation	| transmembrane protein, putative | HC | chr2:6340725-6342432 | 20130731
bdi-miR159a-3p	Medtr8g042410.1	2	13.169	1	20	1188	1207	CUUGGAUUGAAGGGAGCUCU	GGAGCUUCCUUCAAUCCAAU	Cleavage	| myb transcription factor | HC | chr8:16337360-16332955 | 20130731
bdi-miR159a-3p	Medtr2g090105.1	3	11.641	1	20	439	458	CUUGGAUUGAAGGGAGCUCU	UUAGCUCCCUUCAAUCCAAA	Cleavage	| hypothetical protein | HC | chr2:38177532-38176202 | 20130731
bdi-miR159a-3p	Medtr4g048110.1	2.5	11.082	1	20	663	682	CUUGGAUUGAAGGGAGCUCU	AGAGCCCUCUUCAAUCCAAA	Cleavage	| hypothetical protein | HC | chr4:16995132-16991367 | 20130731
bdi-miR159a-3p	Medtr2g015330.1	2.5	7.773	1	20	717	736	CUUGGAUUGAAGGGAGCUCU	AGAGUCCCCUUCAAUCCAAA	Cleavage	| hypothetical protein | HC | chr2:4528863-4526362 | 20130731
bdi-miR159a-3p	Medtr3g011610.1	3	19.505	1	20	1232	1251	CUUGGAUUGAAGGGAGCUCU	GGAGCUCCCUUCACUCCAAU	Cleavage	| myb transcription factor | HC | chr3:2911993-2917319 | 20130731
bdi-miR159a-3p	Medtr8g006470.1	3	18.036	1	20	104	123	CUUGGAUUGAAGGGAGCUCU	GGAGCUCCAUUCGAUCCAAA	Cleavage	| myb transcription factor | HC | chr8:573793-571945 | 20130731
bdi-miR159a-3p	Medtr4g029540.1	3	21.199	1	20	104	123	CUUGGAUUGAAGGGAGCUCU	GGAGCUCCAUUCGAUCCAAA	Cleavage	| myb transcription factor | HC | chr4:10213682-10211682 | 20130731
bdi-miR159a-3p	Medtr1g086980.7	3	15.589	1	20	1203	1222	CUUGGAUUGAAGGGAGCUCU	AGUGCUACCUUCAGUUCAAG	Cleavage	| histone-lysine N-methyltransferase | HC | chr1:38932355-38939970 | 20130731
bdi-miR159a-3p	Medtr1g086980.6	3	15.589	1	20	1203	1222	CUUGGAUUGAAGGGAGCUCU	AGUGCUACCUUCAGUUCAAG	Cleavage	| histone-lysine N-methyltransferase | HC | chr1:38932355-38941480 | 20130731
bdi-miR159a-3p	Medtr1g086980.1	3	15.589	1	20	1374	1393	CUUGGAUUGAAGGGAGCUCU	AGUGCUACCUUCAGUUCAAG	Cleavage	| histone-lysine N-methyltransferase | HC | chr1:38931314-38941671 | 20130731
bdi-miR159a-3p	Medtr1g086980.11	3	15.589	1	20	984	1003	CUUGGAUUGAAGGGAGCUCU	AGUGCUACCUUCAGUUCAAG	Cleavage	| histone-lysine N-methyltransferase | HC | chr1:38933630-38942321 | 20130731
bdi-miR159a-3p	Medtr1g086980.9	3	15.589	1	20	1115	1134	CUUGGAUUGAAGGGAGCUCU	AGUGCUACCUUCAGUUCAAG	Cleavage	| histone-lysine N-methyltransferase | HC | chr1:38932281-38942321 | 20130731
bdi-miR159a-3p	Medtr1g086980.4	3	15.589	1	20	1203	1222	CUUGGAUUGAAGGGAGCUCU	AGUGCUACCUUCAGUUCAAG	Cleavage	| histone-lysine N-methyltransferase | HC | chr1:38932355-38942286 | 20130731
bdi-miR159a-3p	Medtr1g086980.2	3	15.589	1	20	1247	1266	CUUGGAUUGAAGGGAGCUCU	AGUGCUACCUUCAGUUCAAG	Cleavage	| histone-lysine N-methyltransferase | HC | chr1:38932281-38942321 | 20130731
bdi-miR159a-3p	Medtr1g086980.8	3	15.589	1	20	1277	1296	CUUGGAUUGAAGGGAGCUCU	AGUGCUACCUUCAGUUCAAG	Cleavage	| histone-lysine N-methyltransferase | HC | chr1:38932281-38942321 | 20130731
bdi-miR159a-3p	Medtr1g086980.3	3	15.589	1	20	1479	1498	CUUGGAUUGAAGGGAGCUCU	AGUGCUACCUUCAGUUCAAG	Cleavage	| histone-lysine N-methyltransferase | HC | chr1:38932281-38942321 | 20130731
bdi-miR159a-3p	Medtr1g086980.10	3	15.589	1	20	1479	1498	CUUGGAUUGAAGGGAGCUCU	AGUGCUACCUUCAGUUCAAG	Cleavage	| histone-lysine N-methyltransferase | HC | chr1:38932281-38942321 | 20130731
bdi-miR159a-3p	Medtr1g086980.5	3	15.589	1	20	1728	1747	CUUGGAUUGAAGGGAGCUCU	AGUGCUACCUUCAGUUCAAG	Cleavage	| histone-lysine N-methyltransferase | HC | chr1:38932355-38942286 | 20130731
bdi-miR159a-3p	Medtr4g088375.2	3	17.807	1	20	3561	3580	CUUGGAUUGAAGGGAGCUCU	AAAGCUCCCGUCAGUUCAAG	Translation	| homeobox domain protein | HC | chr4:34983103-34993442 | 20130731
bdi-miR159a-3p	Medtr4g088375.4	3	17.807	1	20	3658	3677	CUUGGAUUGAAGGGAGCUCU	AAAGCUCCCGUCAGUUCAAG	Translation	| homeobox domain protein | HC | chr4:34983006-34993442 | 20130731
bdi-miR159a-3p	Medtr4g088375.1	3	17.807	1	20	3663	3682	CUUGGAUUGAAGGGAGCUCU	AAAGCUCCCGUCAGUUCAAG	Translation	| homeobox domain protein | HC | chr4:34983103-34993442 | 20130731
bdi-miR159a-3p	Medtr4g088375.3	3	17.807	1	20	4275	4294	CUUGGAUUGAAGGGAGCUCU	AAAGCUCCCGUCAGUUCAAG	Translation	| homeobox domain protein | HC | chr4:34983103-34993442 | 20130731
ahy-miR159	Medtr4g048110.1	1.5	11.082	1	21	662	682	UUUGGAUUGAAGGGAGCUCUA	UAGAGCCCUCUUCAAUCCAAA	Cleavage	| hypothetical protein | HC | chr4:16995132-16991367 | 20130731
ahy-miR159	Medtr2g015330.1	1.5	7.773	1	21	716	736	UUUGGAUUGAAGGGAGCUCUA	UAGAGUCCCCUUCAAUCCAAA	Cleavage	| hypothetical protein | HC | chr2:4528863-4526362 | 20130731
ahy-miR159	Medtr2g090105.1	2	11.641	1	20	439	458	UUUGGAUUGAAGGGAGCUCU	UUAGCUCCCUUCAAUCCAAA	Cleavage	| hypothetical protein | HC | chr2:38177532-38176202 | 20130731
ahy-miR159	Medtr8g006470.1	2	18.036	1	21	103	123	UUUGGAUUGAAGGGAGCUCUA	UGGAGCUCCAUUCGAUCCAAA	Cleavage	| myb transcription factor | HC | chr8:573793-571945 | 20130731
ahy-miR159	Medtr4g029540.1	2	21.199	1	21	103	123	UUUGGAUUGAAGGGAGCUCUA	UGGAGCUCCAUUCGAUCCAAA	Cleavage	| myb transcription factor | HC | chr4:10213682-10211682 | 20130731
ahy-miR159	Medtr8g042410.1	2	13.169	1	20	1188	1207	UUUGGAUUGAAGGGAGCUCU	GGAGCUUCCUUCAAUCCAAU	Cleavage	| myb transcription factor | HC | chr8:16337360-16332955 | 20130731
ahy-miR159	Medtr3g011610.1	3	19.505	1	21	1231	1251	UUUGGAUUGAAGGGAGCUCUA	UGGAGCUCCCUUCACUCCAAU	Cleavage	| myb transcription factor | HC | chr3:2911993-2917319 | 20130731
ahy-miR159	Medtr1g058000.1	3	21.207	1	21	267	287	UUUGGAUUGAAGGGAGCUCUA	UAGACUUUUCUUCGAUCCAAA	Cleavage	| ovate transcriptional repressor | LC | chr1:25531592-25530909 | 20130731
ahy-miR159	Medtr2g103420.1	3	11.17	1	21	816	836	UUUGGAUUGAAGGGAGCUCUA	UGGAGCUGCCUUUGAUUCAAA	Cleavage	| peptide deformylase 1A | LC | chr2:44525698-44524200 | 20130731
ahy-miR159	Medtr2g096530.1	3	12.835	1	21	1728	1748	UUUGGAUUGAAGGGAGCUCUA	UAUGGCUUUCUUCAAUCUAAA	Cleavage	| alpha-galactosidase | HC | chr2:41231194-41227244 | 20130731
ahy-miR159	Medtr8g463650.3	2.5	8.388	1	20	1779	1798	UUUGGAUUGAAGGGAGCUCU	AAAGCUUCCUUUGAUCCAAA	Cleavage	| P-loop nucleoside triphosphate hydrolase superfamily protein | HC | chr8:22439807-22444703 | 20130731
ahy-miR159	Medtr2g081240.1	3	13.913	1	20	435	455	UUUGG-AUUGAAGGGAGCUCU	AGAGCUCUCUUCAAUGCCAAA	Cleavage	| hypothetical protein | LC | chr2:34095177-34096920 | 20130731
ahy-miR159	Medtr2g084285.3	3	17.298	1	21	899	919	UUUGGAUUGAAGGGAGCUCUA	UAGAUCGCCUUUCAAUUCAAA	Cleavage	| DUF2146 family protein | HC | chr2:35485929-35478439 | 20130731
ahy-miR159	Medtr2g084285.1	3	17.298	1	21	1130	1150	UUUGGAUUGAAGGGAGCUCUA	UAGAUCGCCUUUCAAUUCAAA	Cleavage	| DUF2146 family protein | HC | chr2:35487185-35478439 | 20130731
ahy-miR159	Medtr2g084285.2	3	17.298	1	21	1130	1150	UUUGGAUUGAAGGGAGCUCUA	UAGAUCGCCUUUCAAUUCAAA	Cleavage	| DUF2146 family protein | HC | chr2:35487185-35478439 | 20130731
ahy-miR159	Medtr4g114410.1	3	24.764	1	20	127	146	UUUGGAUUGAAGGGAGCUCU	GGAGUUUUGUUCAAUCCAAA	Cleavage	| DUF3119 family protein | HC | chr4:47039689-47036633 | 20130731
ahy-miR159	Medtr4g114410.3	3	24.764	1	20	127	146	UUUGGAUUGAAGGGAGCUCU	GGAGUUUUGUUCAAUCCAAA	Cleavage	| DUF3119 family protein | HC | chr4:47039689-47036633 | 20130731
ahy-miR159	Medtr4g114410.2	3	24.764	1	20	127	146	UUUGGAUUGAAGGGAGCUCU	GGAGUUUUGUUCAAUCCAAA	Cleavage	| DUF3119 family protein | HC | chr4:47039689-47036633 | 20130731
ahy-miR159	Medtr0637s0010.1	2.5	21.835	1	20	1071	1090	UUUGGAUUGAAGGGAGCUCU	AGGGCAACCUUCAAUCCAAA	Cleavage	| bromodomain protein, putative | LC | scaffold0637:6098-2834 | 20130731
ahy-miR159	Medtr3g033380.1	3	14.562	1	20	3637	3656	UUUGGAUUGAAGGGAGCUCU	AGAGCUCUCUGCAAUUUGAA	Translation	| LRR and NB-ARC domain disease resistance protein | LC | chr3:10662695-10668328 | 20130731
ahy-miR159	Medtr3g448600.1	3	16.431	1	20	90	109	UUUGGAUUGAAGGGAGCUCU	AGAGCUCCUUCAAAUUCAAA	Translation	| hypothetical protein | LC | chr3:16346650-16346231 | 20130731
ahy-miR159	Medtr6g059460.1	3	13.111	1	20	351	370	UUUGGAUUGAAGGGAGCUCU	AGAGCUCCUUCAAAUUCAAA	Translation	| hypothetical protein | HC | chr6:20416686-20415766 | 20130731
ahy-miR159	Medtr2g101330.1	3	19.402	1	20	397	416	UUUGGAUUGAAGGGAGCUCU	AGAGCUGAUUUCGAUCCAAA	Cleavage	| dihydroflavonol reductase | HC | chr2:43558464-43557156 | 20130731
gma-miR319d	Medtr6g072780.2	2.5	20.019	1	20	2536	2555	UGGACUGAAGGGGAGCUCCU	AGCAGCAUCCCUUCAGUCCA	Cleavage	| NB-ARC domain protein | LC | chr6:26958986-26963696 | 20130731
bdi-miR159b-3p.1	Medtr2g090105.1	2	11.641	1	20	439	458	UUUGGAUUGAAGGGAGCUCU	UUAGCUCCCUUCAAUCCAAA	Cleavage	| hypothetical protein | HC | chr2:38177532-38176202 | 20130731
bdi-miR159b-3p.1	Medtr4g048110.1	1.5	11.082	1	21	662	682	UUUGGAUUGAAGGGAGCUCUG	UAGAGCCCUCUUCAAUCCAAA	Cleavage	| hypothetical protein | HC | chr4:16995132-16991367 | 20130731
bdi-miR159b-3p.1	Medtr2g015330.1	1.5	7.773	1	21	716	736	UUUGGAUUGAAGGGAGCUCUG	UAGAGUCCCCUUCAAUCCAAA	Cleavage	| hypothetical protein | HC | chr2:4528863-4526362 | 20130731
bdi-miR159b-3p.1	Medtr8g042410.1	2	13.169	1	20	1188	1207	UUUGGAUUGAAGGGAGCUCU	GGAGCUUCCUUCAAUCCAAU	Cleavage	| myb transcription factor | HC | chr8:16337360-16332955 | 20130731
bdi-miR159b-3p.1	Medtr8g006470.1	2	18.036	1	21	103	123	UUUGGAUUGAAGGGAGCUCUG	UGGAGCUCCAUUCGAUCCAAA	Cleavage	| myb transcription factor | HC | chr8:573793-571945 | 20130731
bdi-miR159b-3p.1	Medtr4g029540.1	2	21.199	1	21	103	123	UUUGGAUUGAAGGGAGCUCUG	UGGAGCUCCAUUCGAUCCAAA	Cleavage	| myb transcription factor | HC | chr4:10213682-10211682 | 20130731
bdi-miR159b-3p.1	Medtr3g011610.1	3	19.505	1	21	1231	1251	UUUGGAUUGAAGGGAGCUCUG	UGGAGCUCCCUUCACUCCAAU	Cleavage	| myb transcription factor | HC | chr3:2911993-2917319 | 20130731
bdi-miR159b-3p.1	Medtr3g033380.1	3	14.562	1	21	3636	3656	UUUGGAUUGAAGGGAGCUCUG	CAGAGCUCUCUGCAAUUUGAA	Translation	| LRR and NB-ARC domain disease resistance protein | LC | chr3:10662695-10668328 | 20130731
bdi-miR159b-3p.1	Medtr8g463650.3	2.5	8.388	1	20	1779	1798	UUUGGAUUGAAGGGAGCUCU	AAAGCUUCCUUUGAUCCAAA	Cleavage	| P-loop nucleoside triphosphate hydrolase superfamily protein | HC | chr8:22439807-22444703 | 20130731
bdi-miR159b-3p.1	Medtr1g058000.1	3	21.207	1	21	267	287	UUUGGAUUGAAGGGAGCUCUG	UAGACUUUUCUUCGAUCCAAA	Cleavage	| ovate transcriptional repressor | LC | chr1:25531592-25530909 | 20130731
bdi-miR159b-3p.1	Medtr2g103420.1	3	11.17	1	21	816	836	UUUGGAUUGAAGGGAGCUCUG	UGGAGCUGCCUUUGAUUCAAA	Cleavage	| peptide deformylase 1A | LC | chr2:44525698-44524200 | 20130731
bdi-miR159b-3p.1	Medtr2g081240.1	3	13.913	1	20	435	455	UUUGG-AUUGAAGGGAGCUCU	AGAGCUCUCUUCAAUGCCAAA	Cleavage	| hypothetical protein | LC | chr2:34095177-34096920 | 20130731
bdi-miR159b-3p.1	Medtr2g096530.1	3	12.835	1	21	1728	1748	UUUGGAUUGAAGGGAGCUCUG	UAUGGCUUUCUUCAAUCUAAA	Cleavage	| alpha-galactosidase | HC | chr2:41231194-41227244 | 20130731
bdi-miR159b-3p.1	Medtr4g114410.3	3	24.764	1	20	127	146	UUUGGAUUGAAGGGAGCUCU	GGAGUUUUGUUCAAUCCAAA	Cleavage	| DUF3119 family protein | HC | chr4:47039689-47036633 | 20130731
bdi-miR159b-3p.1	Medtr4g114410.2	3	24.764	1	20	127	146	UUUGGAUUGAAGGGAGCUCU	GGAGUUUUGUUCAAUCCAAA	Cleavage	| DUF3119 family protein | HC | chr4:47039689-47036633 | 20130731
bdi-miR159b-3p.1	Medtr4g114410.1	3	24.764	1	20	127	146	UUUGGAUUGAAGGGAGCUCU	GGAGUUUUGUUCAAUCCAAA	Cleavage	| DUF3119 family protein | HC | chr4:47039689-47036633 | 20130731
bdi-miR159b-3p.1	Medtr0637s0010.1	2.5	21.835	1	20	1071	1090	UUUGGAUUGAAGGGAGCUCU	AGGGCAACCUUCAAUCCAAA	Cleavage	| bromodomain protein, putative | LC | scaffold0637:6098-2834 | 20130731
bdi-miR159b-3p.1	Medtr2g084285.3	3	17.298	1	21	899	919	UUUGGAUUGAAGGGAGCUCUG	UAGAUCGCCUUUCAAUUCAAA	Cleavage	| DUF2146 family protein | HC | chr2:35485929-35478439 | 20130731
bdi-miR159b-3p.1	Medtr2g084285.1	3	17.298	1	21	1130	1150	UUUGGAUUGAAGGGAGCUCUG	UAGAUCGCCUUUCAAUUCAAA	Cleavage	| DUF2146 family protein | HC | chr2:35487185-35478439 | 20130731
bdi-miR159b-3p.1	Medtr2g084285.2	3	17.298	1	21	1130	1150	UUUGGAUUGAAGGGAGCUCUG	UAGAUCGCCUUUCAAUUCAAA	Cleavage	| DUF2146 family protein | HC | chr2:35487185-35478439 | 20130731
bdi-miR159b-3p.1	Medtr3g448600.1	3	16.431	1	20	90	109	UUUGGAUUGAAGGGAGCUCU	AGAGCUCCUUCAAAUUCAAA	Translation	| hypothetical protein | LC | chr3:16346650-16346231 | 20130731
bdi-miR159b-3p.1	Medtr6g059460.1	3	13.111	1	20	351	370	UUUGGAUUGAAGGGAGCUCU	AGAGCUCCUUCAAAUUCAAA	Translation	| hypothetical protein | HC | chr6:20416686-20415766 | 20130731
bdi-miR159b-3p.1	Medtr2g101330.1	3	19.402	1	20	397	416	UUUGGAUUGAAGGGAGCUCU	AGAGCUGAUUUCGAUCCAAA	Cleavage	| dihydroflavonol reductase | HC | chr2:43558464-43557156 | 20130731
nta-miR482a	Medtr4g014990.1	0.5	18.521	1	21	907	927	UUUCCAAUUCCACCCAUUCCU	GGGGAUGGGUGGAAUUGGAAA	Cleavage	| disease resistance protein (TIR-NBS-LRR class) | HC | chr4:4324381-4318012 | 20130731
nta-miR482a	Medtr4g014990.2	0.5	18.521	1	21	907	927	UUUCCAAUUCCACCCAUUCCU	GGGGAUGGGUGGAAUUGGAAA	Cleavage	| disease resistance protein (TIR-NBS-LRR class) | HC | chr4:4324381-4318012 | 20130731
nta-miR482a	Medtr4g014990.3	0.5	18.521	1	21	907	927	UUUCCAAUUCCACCCAUUCCU	GGGGAUGGGUGGAAUUGGAAA	Cleavage	| disease resistance protein (TIR-NBS-LRR class) | HC | chr4:4324381-4318017 | 20130731
nta-miR482a	Medtr6g463480.1	1	17.165	1	22	329	350	UUUCCAAUUCCACCCAUUCCUA	UGGGCAUGGGUGGAAUUGGAAA	Cleavage	| kinesin KIF2A-like protein | HC | chr6:22008010-22010143 | 20130731
nta-miR482a	Medtr6g477950.1	1	13.926	1	22	39	60	UUUCCAAUUCCACCCAUUCCUA	UGGGCAUGGGUGGAAUUGGAAA	Cleavage	| B3 DNA-binding domain protein | LC | chr6:28716058-28720043 | 20130731
nta-miR482a	Medtr6g079090.1	1	19.784	1	20	775	794	UUUCCAAUUCCACCCAUUCC	GGGAUGGGUGGAAUUGGGAA	Cleavage	| disease resistance protein (TIR-NBS-LRR class) | LC | chr6:29761538-29752605 | 20130731
nta-miR482a	Medtr4g015030.1	1.5	19.15	1	21	924	944	UUUCCAAUUCCACCCAUUCCU	GGGGAUGGGUGGGAUUGGGAA	Cleavage	| disease resistance protein (TIR-NBS-LRR class) | HC | chr4:4332186-4338889 | 20130731
nta-miR482a	Medtr4g015030.2	1.5	19.15	1	21	924	944	UUUCCAAUUCCACCCAUUCCU	GGGGAUGGGUGGGAUUGGGAA	Cleavage	| disease resistance protein (TIR-NBS-LRR class) | HC | chr4:4332186-4338958 | 20130731
nta-miR482a	Medtr7g069580.1	2	16.031	1	21	651	671	UUUCCAAUUCCACCCAUUCCU	GGGGAUGGGUGGAAUAGGAAA	Cleavage	| disease resistance protein (TIR-NBS-LRR class), putative | LC | chr7:25636483-25642524 | 20130731
nta-miR482a	Medtr7g069580.2	2	16.031	1	21	206	226	UUUCCAAUUCCACCCAUUCCU	GGGGAUGGGUGGAAUAGGAAA	Cleavage	| disease resistance protein (TIR-NBS-LRR class), putative | LC | chr7:25638202-25643579 | 20130731
nta-miR482a	Medtr4g015060.1	2	19.402	1	21	945	965	UUUCCAAUUCCACCCAUUCCU	GGGGAUGGGUGGAAUCGGAAA	Cleavage	| disease resistance protein (TIR-NBS-LRR class) | HC | chr4:4356331-4364912 | 20130731
nta-miR482a	Medtr4g015060.2	2	19.402	1	21	945	965	UUUCCAAUUCCACCCAUUCCU	GGGGAUGGGUGGAAUCGGAAA	Cleavage	| disease resistance protein (TIR-NBS-LRR class) | HC | chr4:4356331-4364912 | 20130731
nta-miR482a	Medtr4g015060.3	2	19.402	1	21	945	965	UUUCCAAUUCCACCCAUUCCU	GGGGAUGGGUGGAAUCGGAAA	Cleavage	| disease resistance protein (TIR-NBS-LRR class) | HC | chr4:4356331-4364891 | 20130731
nta-miR482a	Medtr4g015060.4	2	19.402	1	21	945	965	UUUCCAAUUCCACCCAUUCCU	GGGGAUGGGUGGAAUCGGAAA	Cleavage	| disease resistance protein (TIR-NBS-LRR class) | HC | chr4:4356331-4364891 | 20130731
nta-miR482a	Medtr4g014570.1	2	19.942	1	21	886	906	UUUCCAAUUCCACCCAUUCCU	GGGGAUGGGUGGAAUUGGUAA	Cleavage	| disease resistance protein (TIR-NBS-LRR class) | HC | chr4:4130085-4120596 | 20130731
nta-miR482a	Medtr4g014570.2	2	19.942	1	21	920	940	UUUCCAAUUCCACCCAUUCCU	GGGGAUGGGUGGAAUUGGUAA	Cleavage	| disease resistance protein (TIR-NBS-LRR class) | HC | chr4:4130119-4120596 | 20130731
nta-miR482a	Medtr4g080777.2	2	20.397	1	20	256	275	UUUCCAAUUCCACCCAUUCC	GGAAUGGGUGGAAUAGGGAA	Cleavage	| disease resistance protein (TIR-NBS-LRR class), putative | LC | chr4:31244827-31248117 | 20130731
nta-miR482a	Medtr4g080777.1	2	20.397	1	20	916	935	UUUCCAAUUCCACCCAUUCC	GGAAUGGGUGGAAUAGGGAA	Cleavage	| disease resistance protein (TIR-NBS-LRR class), putative | LC | chr4:31243045-31248009 | 20130731
nta-miR482a	Medtr7g088640.1	2	17.843	1	20	550	569	UUUCCAAUUCCACCCAUUCC	GGAAUGGGUGGAGUGGGAAA	Cleavage	| NBS-LRR type disease resistance protein | LC | chr7:34555788-34549515 | 20130731
nta-miR482a	Medtr7g109980.2	2.5	23.104	1	21	168	188	UUUCCAAUUCCACCCAUUCCU	AGGAAUGGGAGGAAUUGCAAA	Cleavage	| dihydroorotate dehydrogenase, putative | HC | chr7:45063708-45065493 | 20130731
nta-miR482a	Medtr7g109980.1	2.5	23.104	1	21	168	188	UUUCCAAUUCCACCCAUUCCU	AGGAAUGGGAGGAAUUGCAAA	Cleavage	| dihydroorotate dehydrogenase, putative | HC | chr7:45063708-45065677 | 20130731
nta-miR482a	Medtr2g083510.1	2.5	17.164	1	21	546	566	UUUCCAAUUCCACCCAUUCCU	GGGGAUGGGUGGAGUAGGAAA	Cleavage	| disease resistance protein (TIR-NBS-LRR class), putative | LC | chr2:35048692-35040985 | 20130731
nta-miR482a	Medtr4g015050.1	2.5	19.819	1	21	1261	1281	UUUCCAAUUCCACCCAUUCCU	GGGGAUGGGUGGAAUGGGGAA	Cleavage	| TIR-NBS-LRR class disease resistance protein | HC | chr4:4340255-4346468 | 20130731
nta-miR482a	Medtr5g005550.2	2.5	16.68	1	21	916	936	UUUCCAAUUCCACCCAUUCCU	GGGGAUGGGUGGAAUAGGGAA	Cleavage	| disease resistance protein (TIR-NBS-LRR class) | LC | chr5:500821-495030 | 20130731
nta-miR482a	Medtr5g005550.1	2.5	16.68	1	21	940	960	UUUCCAAUUCCACCCAUUCCU	GGGGAUGGGUGGAAUAGGGAA	Cleavage	| disease resistance protein (TIR-NBS-LRR class) | LC | chr5:500760-495030 | 20130731
nta-miR482a	Medtr3g081050.1	3	21.279	1	22	870	891	UUUCCAAUUCCACCCAUUCCUA	UGGGGAGGGGUGGAGUUGGAGG	Cleavage	| hypothetical protein | LC | chr3:36710284-36708952 | 20130731
nta-miR482a	Medtr6g088190.1	3	21.969	1	22	659	680	UUUCCAAUUCCACCCAUUCCUA	UAGGAAUUUGUGGAAUUGGAGG	Cleavage	| disease resistance protein (TIR-NBS-LRR class) | LC | chr6:33361447-33358830 | 20130731
nta-miR482a	Medtr2g060700.1	2.5	19.516	1	22	62	83	UUUCCAAUUCCACCCAUUCCUA	UGGGCAUGGGGGGGAUUGGAAA	Cleavage	| disease resistance protein (CC-NBS-LRR class) family protein | LC | chr2:25744330-25741911 | 20130731
nta-miR482a	Medtr7g102940.1	2	12.652	1	20	1058	1077	UUUCCAAUUCCACCCAUUCC	GGAAAGGGUGGAAUUGGAGG	Cleavage	| pectate lyase-like protein | HC | chr7:41367341-41363424 | 20130731
nta-miR482a	Medtr4g081290.1	2.5	20.123	1	20	682	701	UUUCCAAUUCCACCCAUUCC	GGGAUGGGUGGAAUAGGGAA	Cleavage	| disease resistance protein (TIR-NBS-LRR class) | LC | chr4:31501245-31504886 | 20130731
nta-miR482a	Medtr4g080070.1	2.5	13.286	1	20	715	734	UUUCCAAUUCCACCCAUUCC	GGGAUGGGUGGAAUAGGGAA	Cleavage	| disease resistance protein (TIR-NBS-LRR class) | LC | chr4:31030746-31026947 | 20130731
nta-miR482a	Medtr4g081230.1	2.5	18.606	1	20	682	701	UUUCCAAUUCCACCCAUUCC	GGGAUGGGUGGAAUAGGGAA	Cleavage	| disease resistance protein (TIR-NBS-LRR class) | LC | chr4:31476138-31479875 | 20130731
nta-miR482a	Medtr4g080330.1	2.5	18.826	1	20	763	782	UUUCCAAUUCCACCCAUUCC	GGGAUGGGUGGAAUAGGGAA	Cleavage	| disease resistance protein (TIR-NBS-LRR class), putative | LC | chr4:31160315-31156449 | 20130731
nta-miR482a	Medtr4g080060.1	2.5	13.981	1	20	745	764	UUUCCAAUUCCACCCAUUCC	GGGAUGGGUGGAAUAGGGAA	Cleavage	| disease resistance protein (TIR-NBS-LRR class) | LC | chr4:31020895-31016494 | 20130731
nta-miR482a	Medtr4g081270.1	2.5	16.965	1	20	844	863	UUUCCAAUUCCACCCAUUCC	GGGAUGGGUGGAAUAGGGAA	Cleavage	| disease resistance protein (TIR-NBS-LRR class) | LC | chr4:31488558-31492897 | 20130731
nta-miR482a	Medtr4g080060.2	2.5	13.981	1	20	1025	1044	UUUCCAAUUCCACCCAUUCC	GGGAUGGGUGGAAUAGGGAA	Cleavage	| disease resistance protein (TIR-NBS-LRR class) | LC | chr4:31020895-31016517 | 20130731
nta-miR482a	Medtr1g006975.1	2.5	14.452	1	20	550	569	UUUCCAAUUCCACCCAUUCC	GGGAUGGGUGGAGUGGGAAA	Cleavage	| disease resistance protein (CC-NBS-LRR class) family protein | LC | chr1:129008-136403 | 20130731
nta-miR482a	Medtr6g015600.1	2	14.745	1	21	213	233	UUUCCAAUUCCACCCAUUCCU	GGGUAUGGGGGGAAUUGGAAA	Cleavage	| TIR-NBS-LRR class disease resistance protein | LC | chr6:5286942-5283110 | 20130731
nta-miR482a	Medtr8g018280.1	2.5	17.527	1	21	932	952	UUUCCAAUUCCACCCAUUCCU	GGGUAUGGGUGGAAUGGGAAA	Cleavage	| disease resistance protein (TIR-NBS-LRR class), putative | LC | chr8:6198456-6190352 | 20130731
nta-miR482a	Medtr4g020700.3	2.5	21.176	1	21	2340	2360	UUUCCAAUUCCACCCAUUCCU	GGGAAUGGGGGGAACUGGAAA	Cleavage	| disease resistance protein (TIR-NBS-LRR class) | LC | chr4:6645805-6654651 | 20130731
nta-miR482a	Medtr4g020700.1	2.5	21.176	1	21	2371	2391	UUUCCAAUUCCACCCAUUCCU	GGGAAUGGGGGGAACUGGAAA	Cleavage	| disease resistance protein (TIR-NBS-LRR class) | LC | chr4:6645774-6655619 | 20130731
nta-miR482a	Medtr4g020700.2	2.5	21.176	1	21	2340	2360	UUUCCAAUUCCACCCAUUCCU	GGGAAUGGGGGGAACUGGAAA	Cleavage	| disease resistance protein (TIR-NBS-LRR class) | LC | chr4:6645805-6656127 | 20130731
nta-miR482a	Medtr7g010860.1	2.5	16.678	1	22	4	25	UUUCCAAUUCCACCCAUUCCUA	UUGGAAUGGGAGGAAUUGGUAA	Cleavage	| hypothetical protein | HC | chr7:2763812-2764270 | 20130731
nta-miR482a	Medtr5g070040.1	2.5	8.444	1	20	1025	1044	UUUCCAAUUCCACCCAUUCC	AGAAUGGAUGGAAUUGGAAG	Cleavage	| UDP-glucosyltransferase family protein | HC | chr5:29678218-29679659 | 20130731
nta-miR482a	Medtr5g070090.1	2.5	11.774	1	20	1167	1186	UUUCCAAUUCCACCCAUUCC	AGAAUGGAUGGAAUUGGAAG	Cleavage	| UDP-glucosyltransferase family protein | HC | chr5:29700515-29702410 | 20130731
nta-miR482a	Medtr1g047800.1	2	17.215	1	22	678	699	UUUCCAAUUCCACCCAUUCCUA	UUGGUAUGGGAGGAAUUGGAAA	Cleavage	| disease resistance protein (CC-NBS-LRR class) family protein | HC | chr1:18084465-18087983 | 20130731
nta-miR482a	Medtr4g080077.1	2.5	11.503	1	20	63	82	UUUCCAAUUCCACCCAUUCC	GGAAUGGGAGGAAUAGGAAA	Cleavage	| NBS-LRR type disease resistance protein | LC | chr4:31034114-31033669 | 20130731
nta-miR482a	Medtr2g071820.1	3	19.025	1	20	613	632	UUUCCAAUUCCACCCAUUCC	GGGAUGGGUGGAGUGGGGAA	Cleavage	| LRR and NB-ARC domain disease resistance protein | LC | chr2:30006225-30010652 | 20130731
nta-miR482a	Medtr7g026400.1	3	14.252	1	21	1263	1283	UUUCCAAUUCCACCCAUUCCU	AGAAAUGGUUGGAAUUGGAAC	Cleavage	| response regulator receiver domain protein | LC | chr7:8764701-8760736 | 20130731
nta-miR482a	Medtr1g111590.1	2.5	13.398	1	20	1286	1305	UUUCCAAUUCCACCCAUUCC	GGAGUGGUUGGAAUUGGAGG	Cleavage	| pectate lyase family protein | HC | chr1:50437999-50435574 | 20130731
nta-miR482a	Medtr4g081250.1	2.5	22.988	1	20	640	659	UUUCCAAUUCCACCCAUUCC	GGGAUGAGUGGAGUUGGGAA	Cleavage	| disease resistance protein (TIR-NBS-LRR class) | HC | chr4:31482016-31485381 | 20130731
nta-miR482a	Medtr6g038090.1	2.5	18.275	1	20	604	623	UUUCCAAUUCCACCCAUUCC	GGAAUGGGCGGAAUAGGAAA	Cleavage	| disease resistance protein (TIR-NBS-LRR class), putative | LC | chr6:13607999-13615713 | 20130731
nta-miR482a	Medtr4g080320.1	3	24.5	1	20	655	674	UUUCCAAUUCCACCCAUUCC	GGGAUGGGUGGAGUAGGGAA	Cleavage	| disease resistance protein (TIR-NBS-LRR class), putative | HC | chr4:31151353-31147654 | 20130731
nta-miR482a	Medtr4g081330.1	3	17.441	1	20	682	701	UUUCCAAUUCCACCCAUUCC	GGGAUGGGUGGAGUAGGGAA	Cleavage	| disease resistance protein (TIR-NBS-LRR class), putative | LC | chr4:31529493-31524705 | 20130731
nta-miR482a	Medtr4g080320.2	3	24.5	1	20	862	881	UUUCCAAUUCCACCCAUUCC	GGGAUGGGUGGAGUAGGGAA	Cleavage	| disease resistance protein (TIR-NBS-LRR class), putative | HC | chr4:31151502-31147393 | 20130731
nta-miR482a	Medtr2g072150.1	3	18.229	1	20	575	594	UUUCCAAUUCCACCCAUUCC	GGGAUGGGUGGAGUGGGGAA	Cleavage	| disease resistance protein (CC-NBS-LRR class) family protein | LC | chr2:30276878-30282278 | 20130731
nta-miR482a	Medtr6g088260.1	2.5	22.079	1	20	776	795	UUUCCAAUUCCACCCAUUCC	GGAAUGGGCGGAAUAGGAAA	Cleavage	| disease resistance protein (TIR-NBS-LRR class) | LC | chr6:33412973-33407320 | 20130731
nta-miR482a	Medtr3g053200.1	2.5	18.18	1	20	535	554	UUUCCAAUUCCACCCAUUCC	GGAAUGGGUGGAUGUGGAAA	Cleavage	| disease resistance protein (CC-NBS-LRR class) family protein | HC | chr3:21121992-21126814 | 20130731
nta-miR482a	Medtr6g088260.2	2.5	22.079	1	20	776	795	UUUCCAAUUCCACCCAUUCC	GGAAUGGGCGGAAUAGGAAA	Cleavage	| disease resistance protein (TIR-NBS-LRR class) | LC | chr6:33412973-33407320 | 20130731
nta-miR482a	Medtr6g088260.3	2.5	22.079	1	20	776	795	UUUCCAAUUCCACCCAUUCC	GGAAUGGGCGGAAUAGGAAA	Cleavage	| disease resistance protein (TIR-NBS-LRR class) | LC | chr6:33412973-33407187 | 20130731
nta-miR482a	Medtr2g071890.1	3	16.178	1	20	535	554	UUUCCAAUUCCACCCAUUCC	GGGAUGGGUGGAGUGGGGAA	Cleavage	| disease resistance protein (CC-NBS-LRR class) family protein | LC | chr2:30065606-30070807 | 20130731
nta-miR482a	Medtr7g088290.1	3	23.049	1	20	550	569	UUUCCAAUUCCACCCAUUCC	GGGAUGGGUGGAGUGGGGAA	Cleavage	| NBS-LRR type disease resistance protein | HC | chr7:34370744-34378066 | 20130731
nta-miR482a	Medtr7g068270.1	3	22.146	1	21	122	142	UUUCCAAUUCCACCCAUUCCU	AAGAUUGGGUGGGAUUGGAGA	Cleavage	| transmembrane protein, putative | LC | chr7:24958011-24957769 | 20130731
nta-miR482a	Medtr8g020280.1	2.5	13.525	1	21	177	197	UUUCCAAUUCCACCCAUUCCU	GGGGAUGAGUGGUAUUGGAAA	Translation	| NB-ARC domain disease resistance protein | HC | chr8:7082203-7080793 | 20130731
nta-miR482a	Medtr3g058790.1	3	22.198	1	21	666	686	UUUCCAAUUCCACCCAUUCCU	GGGCAUGGGUGGGAUAGGAAA	Cleavage	| disease resistance protein (TIR-NBS-LRR class) | HC | chr3:23449523-23446078 | 20130731
nta-miR482a	Medtr5g036240.1	3	18.083	1	21	198	218	UUUCCAAUUCCACCCAUUCCU	GGGAAUGGGAGGGAUUGGCAA	Cleavage	| TIR-NBS-LRR class disease resistance protein | LC | chr5:15799895-15805647 | 20130731
nta-miR482a	Medtr6g015410.1	3	20.132	1	21	694	714	UUUCCAAUUCCACCCAUUCCU	GGGUAUGGGUGGGAUUGGUAA	Cleavage	| disease resistance protein (TIR-NBS-LRR class) | HC | chr6:5077420-5072281 | 20130731
nta-miR482a	Medtr2g083520.1	3	15.425	1	21	1011	1031	UUUCCAAUUCCACCCAUUCCU	GGGGAUGGCUGGAAUCGGAAA	Cleavage	| disease resistance protein (TIR-NBS-LRR class), putative | LC | chr2:35057303-35050258 | 20130731
nta-miR482a	Medtr2g083520.2	3	15.425	1	21	1002	1022	UUUCCAAUUCCACCCAUUCCU	GGGGAUGGCUGGAAUCGGAAA	Cleavage	| disease resistance protein (TIR-NBS-LRR class), putative | LC | chr2:35058143-35050214 | 20130731
nta-miR482a	Medtr8g017800.1	3	15.091	1	21	919	939	UUUCCAAUUCCACCCAUUCCU	GGGCAUGGGUGGAAUAGGGAA	Cleavage	| disease resistance protein (TIR-NBS-LRR class) | LC | chr8:6047759-6038531 | 20130731
nta-miR482a	Medtr5g099160.1	3	14.678	1	20	67	86	UUUCCAAUUCCACCCAUUCC	AGAAUGGUUGGGAUUGGGAA	Cleavage	| cation/calcium exchanger, putative | LC | chr5:43465636-43466008 | 20130731
nta-miR482a	Medtr5g035240.1	2.5	17.494	1	22	587	608	UUUCCAAUUCCACCCAUUCCUA	UCGGUGUUGGUGGAAUUGGAAA	Cleavage	| NB-ARC domain disease resistance protein | HC | chr5:15337184-15334263 | 20130731
nta-miR482a	Medtr7g115300.1	2.5	20.79	1	22	1806	1827	UUUCCAAUUCCACCCAUUCCUA	UUGGAGUUGGUGGAUUUGGAAA	Cleavage	| malectin/receptor-like kinase family protein | HC | chr7:47622440-47625537 | 20130731
nta-miR482a	Medtr1g016210.1	2.5	17.63	1	22	717	738	UUUCCAAUUCCACCCAUUCCUA	UUGGAAUGGGGGGACUUGGGAA	Cleavage	| disease resistance protein (CC-NBS-LRR class) family protein | HC | chr1:4255053-4259559 | 20130731
nta-miR482a	Medtr3g014080.2	2.5	14.55	1	22	767	788	UUUCCAAUUCCACCCAUUCCUA	UUGGUAUGGGAGGGAUUGGAAA	Cleavage	| LRR and NB-ARC domain disease resistance protein | HC | chr3:3914596-3909846 | 20130731
nta-miR482a	Medtr3g014080.1	2.5	14.55	1	22	767	788	UUUCCAAUUCCACCCAUUCCUA	UUGGUAUGGGAGGGAUUGGAAA	Cleavage	| LRR and NB-ARC domain disease resistance protein | HC | chr3:3914596-3909846 | 20130731
nta-miR482a	Medtr6g027090.1	3	16.174	1	20	121	140	UUUCCAAUUCCACCCAUUCC	GGAAUGGGAGGAAUAGGGAA	Cleavage	| TIR-NBS-LRR class disease resistance protein | LC | chr6:9168977-9167533 | 20130731
nta-miR482a	Medtr6g084370.1	3	18.642	1	20	652	671	UUUCCAAUUCCACCCAUUCC	GGAAUGGGGGGAAUAGGGAA	Cleavage	| disease resistance protein (TIR-NBS-LRR class) | LC | chr6:31566252-31567625 | 20130731
nta-miR482a	Medtr4g104320.1	2.5	15.413	1	20	1117	1136	UUUCCAAUUCCACCCAUUCC	GGAAAGGAUGGAAUUGGAGA	Cleavage	| pectate lyase family protein | HC | chr4:43130399-43132759 | 20130731
nta-miR482a	Medtr1g047370.1	2.5	19.006	1	20	1324	1343	UUUCCAAUUCCACCCAUUCC	GGAAAGGUUGGAAUUGGAGA	Cleavage	| pectate lyase family protein | HC | chr1:17906812-17912121 | 20130731
nta-miR482a	Medtr7g018780.2	3	17.789	1	20	729	748	UUUCCAAUUCCACCCAUUCC	GGAAUGGGAGGAGUAGGAAA	Cleavage	| LRR and NB-ARC domain disease resistance protein | LC | chr7:6186100-6179378 | 20130731
nta-miR482a	Medtr4g091450.1	3	14.127	1	20	245	264	UUUCCAAUUCCACCCAUUCC	GGAAUGGGUGGCGUCGGAAA	Translation	| NBS-LRR type disease resistance protein | LC | chr4:36233165-36230705 | 20130731
nta-miR482a	Medtr7g018780.1	3	17.789	1	20	814	833	UUUCCAAUUCCACCCAUUCC	GGAAUGGGAGGAGUAGGAAA	Cleavage	| LRR and NB-ARC domain disease resistance protein | LC | chr7:6185892-6179378 | 20130731
nta-miR482a	Medtr5g027910.1	3	14.173	1	20	602	621	UUUCCAAUUCCACCCAUUCC	GGAAUGGGAGGGAUGGGAAA	Cleavage	| disease resistance protein (CC-NBS-LRR class) family protein | HC | chr5:11649406-11653208 | 20130731
nta-miR482a	Medtr0038s0060.1	2.5	22.667	1	20	685	704	UUUCCAAUUCCACCCAUUCC	GGGACUGGUGGAAUUGGAAA	Cleavage	| functional resistance protein KR1, putative | LC | scaffold0038:34557-40141 | 20130731
nta-miR482a	Medtr6g075950.1	2.5	22.667	1	20	631	650	UUUCCAAUUCCACCCAUUCC	GGGACUGGUGGAAUUGGAAA	Cleavage	| functional resistance protein KR1, putative | LC | chr6:28234396-28240056 | 20130731
nta-miR482a	Medtr7g018850.1	3	21.257	1	20	772	791	UUUCCAAUUCCACCCAUUCC	GGAAUGGGAGGAGUAGGAAA	Cleavage	| LRR and NB-ARC domain disease resistance protein | LC | chr7:6251896-6245587 | 20130731
nta-miR482a	Medtr7g018810.1	3	15.417	1	20	736	755	UUUCCAAUUCCACCCAUUCC	GGAAUGGGAGGAGUCGGAAA	Cleavage	| LRR and NB-ARC domain disease resistance protein, putative | LC | chr7:6211389-6206309 | 20130731
nta-miR482a	Medtr5g027870.1	3	14.204	1	20	733	752	UUUCCAAUUCCACCCAUUCC	GGAAUGGGAGGGAUGGGAAA	Cleavage	| disease resistance protein (CC-NBS-LRR class) family protein | HC | chr5:11627355-11631001 | 20130731
nta-miR482a	Medtr6g087850.1	3	22.413	1	20	733	752	UUUCCAAUUCCACCCAUUCC	GGAAUGGGAGGAAUAGGGAA	Cleavage	| disease resistance protein (TIR-NBS-LRR class) | LC | chr6:33060567-33056926 | 20130731
nta-miR482a	Medtr5g040490.1	3	15.426	1	20	676	695	UUUCCAAUUCCACCCAUUCC	GGAAUGGGUGGGUUAGGAAA	Cleavage	| disease resistance protein (TIR-NBS-LRR class) | LC | chr5:17801007-17804880 | 20130731
nta-miR482a	Medtr8g039870.1	3	21.784	1	20	682	701	UUUCCAAUUCCACCCAUUCC	GGUAUGGGUGGAAUAGGGAA	Cleavage	| disease resistance protein (TIR-NBS-LRR class) | HC | chr8:14815999-14812163 | 20130731
nta-miR482a	Medtr8g039870.2	3	21.784	1	20	682	701	UUUCCAAUUCCACCCAUUCC	GGUAUGGGUGGAAUAGGGAA	Cleavage	| disease resistance protein (TIR-NBS-LRR class) | HC | chr8:14815999-14812163 | 20130731
nta-miR482a	Medtr8g039870.5	3	21.784	1	20	682	701	UUUCCAAUUCCACCCAUUCC	GGUAUGGGUGGAAUAGGGAA	Cleavage	| disease resistance protein (TIR-NBS-LRR class) | HC | chr8:14815999-14812163 | 20130731
nta-miR482a	Medtr8g039870.7	3	21.784	1	20	682	701	UUUCCAAUUCCACCCAUUCC	GGUAUGGGUGGAAUAGGGAA	Cleavage	| disease resistance protein (TIR-NBS-LRR class) | HC | chr8:14815999-14812163 | 20130731
nta-miR482a	Medtr8g039870.4	3	21.784	1	20	682	701	UUUCCAAUUCCACCCAUUCC	GGUAUGGGUGGAAUAGGGAA	Cleavage	| disease resistance protein (TIR-NBS-LRR class) | HC | chr8:14815999-14812163 | 20130731
nta-miR482a	Medtr8g039870.6	3	21.784	1	20	682	701	UUUCCAAUUCCACCCAUUCC	GGUAUGGGUGGAAUAGGGAA	Cleavage	| disease resistance protein (TIR-NBS-LRR class) | HC | chr8:14815999-14812163 | 20130731
nta-miR482a	Medtr8g039870.3	3	21.784	1	20	682	701	UUUCCAAUUCCACCCAUUCC	GGUAUGGGUGGAAUAGGGAA	Cleavage	| disease resistance protein (TIR-NBS-LRR class) | HC | chr8:14815999-14812163 | 20130731
nta-miR482a	Medtr6g084360.1	3	19.947	1	20	247	266	UUUCCAAUUCCACCCAUUCC	GGAAUGGGAGGAAUAGGGAA	Cleavage	| NB-ARC domain protein | LC | chr6:31560151-31565340 | 20130731
nta-miR482a	Medtr6g087200.2	3	17.988	1	20	828	847	UUUCCAAUUCCACCCAUUCC	GGAAUGGGAGGAAUAGGGAA	Cleavage	| disease resistance protein (TIR-NBS-LRR class), putative | LC | chr6:33275133-33271151 | 20130731
nta-miR482a	Medtr6g088465.1	3	17.879	1	20	810	829	UUUCCAAUUCCACCCAUUCC	GGAAUGGGAGGAAUAGGGAA	Cleavage	| disease resistance protein (TIR-NBS-LRR class) | LC | chr6:33641608-33645391 | 20130731
nta-miR482a	Medtr6g079120.1	3	24.458	1	20	710	729	UUUCCAAUUCCACCCAUUCC	GGGAUUGGUGGAAUAGGAAA	Cleavage	| disease resistance protein (TIR-NBS-LRR class), putative | LC | chr6:29793907-29767083 | 20130731
nta-miR482a	Medtr6g088250.3	3	21.266	1	20	670	689	UUUCCAAUUCCACCCAUUCC	GGAAUGGGAGGAAUAGGGAA	Cleavage	| disease resistance protein (TIR-NBS-LRR class), putative | LC | chr6:33403560-33397535 | 20130731
nta-miR482a	Medtr1g036520.2	3	20.45	1	20	964	983	UUUCCAAUUCCACCCAUUCC	GGGUUGGGUGGGGUUGGGAA	Cleavage	| NB-ARC domain disease resistance protein | LC | chr1:13416972-13425357 | 20130731
nta-miR482a	Medtr3g055210.1	3	19.762	1	20	654	673	UUUCCAAUUCCACCCAUUCC	GGAAUGGGUGGAUGUGGGAA	Cleavage	| NB-ARC domain disease resistance protein | LC | chr3:21697948-21706893 | 20130731
nta-miR482a	Medtr1g036520.1	3	20.45	1	20	1080	1099	UUUCCAAUUCCACCCAUUCC	GGGUUGGGUGGGGUUGGGAA	Cleavage	| NB-ARC domain disease resistance protein | LC | chr1:13411357-13425357 | 20130731
nta-miR482a	Medtr0007s0140.2	3	15.822	1	20	726	745	UUUCCAAUUCCACCCAUUCC	GGAAUCGGUGGAAUAGGGAA	Cleavage	| disease resistance protein (TIR-NBS-LRR class), putative | LC | scaffold0007:65325-72860 | 20130731
nta-miR482a	Medtr7g018840.1	3	14.45	1	20	340	359	UUUCCAAUUCCACCCAUUCC	GGAAUGGGAGGAGUCGGAAA	Cleavage	| LRR and NB-ARC domain disease resistance protein | LC | chr7:6239105-6232716 | 20130731
nta-miR482a	Medtr6g088250.2	3	21.266	1	20	670	689	UUUCCAAUUCCACCCAUUCC	GGAAUGGGAGGAAUAGGGAA	Cleavage	| disease resistance protein (TIR-NBS-LRR class), putative | LC | chr6:33403560-33397271 | 20130731
nta-miR482a	Medtr0007s0140.1	3	15.822	1	20	726	745	UUUCCAAUUCCACCCAUUCC	GGAAUCGGUGGAAUAGGGAA	Cleavage	| disease resistance protein (TIR-NBS-LRR class), putative | LC | scaffold0007:65325-72860 | 20130731
nta-miR482a	Medtr6g087260.1	3	17.873	1	20	802	821	UUUCCAAUUCCACCCAUUCC	GGAAUGGGAGGAAUAGGGAA	Cleavage	| disease resistance protein (TIR-NBS-LRR class) | LC | chr6:33307567-33303323 | 20130731
nta-miR482a	Medtr6g088245.1	3	17.545	1	20	696	715	UUUCCAAUUCCACCCAUUCC	GGAAUGGGAGGAAUAGGGAA	Cleavage	| disease resistance protein (TIR-NBS-LRR class) | LC | chr6:33391048-33386330 | 20130731
nta-miR482a	Medtr3g055230.1	3	17.499	1	20	532	551	UUUCCAAUUCCACCCAUUCC	GGAAUGGGUGGAUGUGGGAA	Cleavage	| disease resistance protein (CC-NBS-LRR class) family protein | HC | chr3:21716395-21711549 | 20130731
nta-miR482a	Medtr8g039910.1	3	21.784	1	20	726	745	UUUCCAAUUCCACCCAUUCC	GGUAUGGGUGGAAUAGGGAA	Cleavage	| disease resistance protein (TIR-NBS-LRR class) | HC | chr8:14829697-14834485 | 20130731
nta-miR482a	Medtr6g087200.1	3	17.988	1	20	828	847	UUUCCAAUUCCACCCAUUCC	GGAAUGGGAGGAAUAGGGAA	Cleavage	| disease resistance protein (TIR-NBS-LRR class), putative | LC | chr6:33275133-33269872 | 20130731
nta-miR482a	Medtr8g039910.2	3	21.784	1	20	682	701	UUUCCAAUUCCACCCAUUCC	GGUAUGGGUGGAAUAGGGAA	Cleavage	| disease resistance protein (TIR-NBS-LRR class) | HC | chr8:14829741-14834485 | 20130731
nta-miR482a	Medtr2g097670.2	2.5	13.759	1	20	800	819	UUUCCAAUUCCACCCAUUCC	GCAAUUGGUGGAAUUGGAGA	Cleavage	| pumilio Mpt5 protein, putative | HC | chr2:41717566-41723738 | 20130731
nta-miR482a	Medtr8g039910.4	3	21.784	1	20	682	701	UUUCCAAUUCCACCCAUUCC	GGUAUGGGUGGAAUAGGGAA	Cleavage	| disease resistance protein (TIR-NBS-LRR class) | HC | chr8:14829741-14834485 | 20130731
nta-miR482a	Medtr8g039910.3	3	21.784	1	20	682	701	UUUCCAAUUCCACCCAUUCC	GGUAUGGGUGGAAUAGGGAA	Cleavage	| disease resistance protein (TIR-NBS-LRR class) | HC | chr8:14829741-14834485 | 20130731
nta-miR482a	Medtr2g097670.1	2.5	13.759	1	20	931	950	UUUCCAAUUCCACCCAUUCC	GCAAUUGGUGGAAUUGGAGA	Cleavage	| pumilio Mpt5 protein, putative | HC | chr2:41717566-41723738 | 20130731
nta-miR482a	Medtr8g464870.1	3	12.222	1	20	670	689	UUUCCAAUUCCACCCAUUCC	GGAAUGGGCGGAACUGGGAA	Cleavage	| disease resistance protein (CC-NBS-LRR class) family protein | HC | chr8:23011577-23006252 | 20130731
nta-miR482a	Medtr6g088250.1	3	21.266	1	20	670	689	UUUCCAAUUCCACCCAUUCC	GGAAUGGGAGGAAUAGGGAA	Cleavage	| disease resistance protein (TIR-NBS-LRR class), putative | LC | chr6:33403560-33394883 | 20130731
nta-miR482a	Medtr8g039910.5	3	21.784	1	20	726	745	UUUCCAAUUCCACCCAUUCC	GGUAUGGGUGGAAUAGGGAA	Cleavage	| disease resistance protein (TIR-NBS-LRR class) | HC | chr8:14829697-14834485 | 20130731
nta-miR482a	Medtr0006s0080.1	3	20.932	1	20	538	557	UUUCCAAUUCCACCCAUUCC	GGGUUGGGUGGGGUUGGGAA	Cleavage	| NBS-LRR type disease resistance protein | LC | scaffold0006:51270-63385 | 20130731
nta-miR482a	Medtr3g055230.3	3	17.499	1	20	788	807	UUUCCAAUUCCACCCAUUCC	GGAAUGGGUGGAUGUGGGAA	Cleavage	| disease resistance protein (CC-NBS-LRR class) family protein | HC | chr3:21716998-21711227 | 20130731
nta-miR482a	Medtr2g097670.3	2.5	13.759	1	20	931	950	UUUCCAAUUCCACCCAUUCC	GCAAUUGGUGGAAUUGGAGA	Cleavage	| pumilio Mpt5 protein, putative | HC | chr2:41717566-41723738 | 20130731
nta-miR482a	Medtr6g087320.1	3	20.633	1	20	670	689	UUUCCAAUUCCACCCAUUCC	GGAAUGGGAGGAAUAGGGAA	Cleavage	| disease resistance protein (TIR-NBS-LRR class) | LC | chr6:33288524-33280897 | 20130731
nta-miR482a	Medtr3g055230.15	3	17.499	1	20	752	771	UUUCCAAUUCCACCCAUUCC	GGAAUGGGUGGAUGUGGGAA	Cleavage	| disease resistance protein (CC-NBS-LRR class) family protein | HC | chr3:21716962-21711260 | 20130731
nta-miR482a	Medtr3g055230.2	3	17.499	1	20	752	771	UUUCCAAUUCCACCCAUUCC	GGAAUGGGUGGAUGUGGGAA	Cleavage	| disease resistance protein (CC-NBS-LRR class) family protein | HC | chr3:21716962-21711243 | 20130731
nta-miR482a	Medtr1g037010.2	3	20.932	1	20	538	557	UUUCCAAUUCCACCCAUUCC	GGGUUGGGUGGGGUUGGGAA	Cleavage	| NBS-LRR type disease resistance protein | LC | chr1:13607004-13616185 | 20130731
nta-miR482a	Medtr1g037010.3	3	20.932	1	20	538	557	UUUCCAAUUCCACCCAUUCC	GGGUUGGGUGGGGUUGGGAA	Cleavage	| NBS-LRR type disease resistance protein | LC | chr1:13607004-13616185 | 20130731
nta-miR482a	Medtr1g037010.1	3	20.932	1	20	538	557	UUUCCAAUUCCACCCAUUCC	GGGUUGGGUGGGGUUGGGAA	Cleavage	| NBS-LRR type disease resistance protein | LC | chr1:13607004-13616185 | 20130731
nta-miR482a	Medtr3g055230.8	3	17.499	1	20	788	807	UUUCCAAUUCCACCCAUUCC	GGAAUGGGUGGAUGUGGGAA	Cleavage	| disease resistance protein (CC-NBS-LRR class) family protein | HC | chr3:21716998-21711227 | 20130731
nta-miR482a	Medtr3g055230.6	3	17.499	1	20	752	771	UUUCCAAUUCCACCCAUUCC	GGAAUGGGUGGAUGUGGGAA	Cleavage	| disease resistance protein (CC-NBS-LRR class) family protein | HC | chr3:21716962-21711243 | 20130731
nta-miR482a	Medtr3g055230.4	3	17.499	1	20	752	771	UUUCCAAUUCCACCCAUUCC	GGAAUGGGUGGAUGUGGGAA	Cleavage	| disease resistance protein (CC-NBS-LRR class) family protein | HC | chr3:21716962-21711244 | 20130731
nta-miR482a	Medtr3g055230.5	3	17.499	1	20	752	771	UUUCCAAUUCCACCCAUUCC	GGAAUGGGUGGAUGUGGGAA	Cleavage	| disease resistance protein (CC-NBS-LRR class) family protein | HC | chr3:21716962-21711244 | 20130731
nta-miR482a	Medtr3g055230.11	3	17.499	1	20	752	771	UUUCCAAUUCCACCCAUUCC	GGAAUGGGUGGAUGUGGGAA	Cleavage	| disease resistance protein (CC-NBS-LRR class) family protein | HC | chr3:21716962-21711260 | 20130731
nta-miR482a	Medtr3g055230.10	3	17.499	1	20	752	771	UUUCCAAUUCCACCCAUUCC	GGAAUGGGUGGAUGUGGGAA	Cleavage	| disease resistance protein (CC-NBS-LRR class) family protein | HC | chr3:21716962-21711260 | 20130731
nta-miR482a	Medtr3g055230.7	3	17.499	1	20	752	771	UUUCCAAUUCCACCCAUUCC	GGAAUGGGUGGAUGUGGGAA	Cleavage	| disease resistance protein (CC-NBS-LRR class) family protein | HC | chr3:21716962-21711244 | 20130731
nta-miR482a	Medtr3g055230.9	3	17.499	1	20	752	771	UUUCCAAUUCCACCCAUUCC	GGAAUGGGUGGAUGUGGGAA	Cleavage	| disease resistance protein (CC-NBS-LRR class) family protein | HC | chr3:21716962-21711260 | 20130731
nta-miR482a	Medtr3g055230.14	3	17.499	1	20	752	771	UUUCCAAUUCCACCCAUUCC	GGAAUGGGUGGAUGUGGGAA	Cleavage	| disease resistance protein (CC-NBS-LRR class) family protein | HC | chr3:21716962-21711260 | 20130731
nta-miR482a	Medtr7g018640.1	3	14.986	1	20	859	878	UUUCCAAUUCCACCCAUUCC	GGAAUGGGAGGAGUGGGAAA	Cleavage	| NB-ARC domain disease resistance protein | LC | chr7:6096180-6087180 | 20130731
nta-miR482a	Medtr7g018640.1	3	17	1	20	3982	4001	UUUCCAAUUCCACCCAUUCC	GGAAUGGGGGGAGUGGGAAA	Cleavage	| NB-ARC domain disease resistance protein | LC | chr7:6096180-6087180 | 20130731
nta-miR482a	Medtr3g055230.12	3	17.499	1	20	752	771	UUUCCAAUUCCACCCAUUCC	GGAAUGGGUGGAUGUGGGAA	Cleavage	| disease resistance protein (CC-NBS-LRR class) family protein | HC | chr3:21716962-21711260 | 20130731
nta-miR482a	Medtr3g055230.16	3	17.499	1	20	752	771	UUUCCAAUUCCACCCAUUCC	GGAAUGGGUGGAUGUGGGAA	Cleavage	| disease resistance protein (CC-NBS-LRR class) family protein | HC | chr3:21716962-21711260 | 20130731
nta-miR482a	Medtr3g055230.13	3	17.499	1	20	752	771	UUUCCAAUUCCACCCAUUCC	GGAAUGGGUGGAUGUGGGAA	Cleavage	| disease resistance protein (CC-NBS-LRR class) family protein | HC | chr3:21716962-21711243 | 20130731
aly-miR166a-3p	Medtr2g101190.1	1.5	20.401	1	20	1078	1097	UCGGACCAGGCUUCAUUCCC	UGGAAUGAAGCCUGGUCCGG	Cleavage	| class III homeodomain leucine zipper protein | HC | chr2:43512049-43503468 | 20130731
aly-miR166a-3p	Medtr2g030130.1	2	19.214	1	20	940	959	UCGGACCAGGCUUCAUUCCC	UGGGAUGAAGCCUGGUCCGG	Cleavage	| class III homeodomain leucine zipper protein | HC | chr2:11288103-11282650 | 20130731
aly-miR166a-3p	Medtr2g094520.1	2	21.009	1	20	1449	1468	UCGGACCAGGCUUCAUUCCC	UGGGAUGAAGCCUGGUCCGG	Cleavage	| class III homeodomain leucine zipper protein | HC | chr2:40311798-40317320 | 20130731
aly-miR166a-3p	Medtr2g030240.2	3	16.626	1	21	927	947	UCGGACCAGGCUUCAUUCCCC	GAGGAGUGAAGUCUGGUUUGA	Cleavage	| 2-succinylbenzoate-CoA ligase/peroxisomal protein | HC | chr2:11343102-11346176 | 20130731
aly-miR166a-3p	Medtr2g030240.1	3	16.626	1	21	1209	1229	UCGGACCAGGCUUCAUUCCCC	GAGGAGUGAAGUCUGGUUUGA	Cleavage	| 2-succinylbenzoate-CoA ligase/peroxisomal protein | HC | chr2:11342493-11346176 | 20130731
aly-miR166a-3p	Medtr2g086340.1	3	13.54	1	20	295	314	UCGGACCAGGCUUCAUUCCC	GUGGAUGAAGUUUGGUCUGA	Cleavage	| bZIP transcription factor | HC | chr2:36304919-36306544 | 20130731
aly-miR166a-3p	Medtr1g054535.2	3	20.276	1	20	685	704	UCGGACCAGGCUUCAUUCCC	GGCAAUGAAACUUGGUUCGA	Translation	| carbon catabolite repressor-like protein | HC | chr1:23604507-23609333 | 20130731
aly-miR166a-3p	Medtr1g054605.3	3	20.176	1	20	402	421	UCGGACCAGGCUUCAUUCCC	GGCAAUGAAACUUGGUUCGA	Translation	| carbon catabolite repressor-like protein | HC | chr1:23714281-23719289 | 20130731
aly-miR166a-3p	Medtr1g054605.4	3	20.176	1	20	435	454	UCGGACCAGGCUUCAUUCCC	GGCAAUGAAACUUGGUUCGA	Translation	| carbon catabolite repressor-like protein | HC | chr1:23714248-23719289 | 20130731
aly-miR166a-3p	Medtr1g054605.1	3	20.176	1	20	402	421	UCGGACCAGGCUUCAUUCCC	GGCAAUGAAACUUGGUUCGA	Translation	| carbon catabolite repressor-like protein | HC | chr1:23714281-23719289 | 20130731
aly-miR166a-3p	Medtr1g054605.2	3	20.176	1	20	435	454	UCGGACCAGGCUUCAUUCCC	GGCAAUGAAACUUGGUUCGA	Translation	| carbon catabolite repressor-like protein | HC | chr1:23714248-23719289 | 20130731
aly-miR166a-3p	Medtr1g054545.1	3	21.075	1	20	1087	1106	UCGGACCAGGCUUCAUUCCC	GGCAAUGAAACUUGGUUCGA	Translation	| endonuclease/exonuclease/phosphatase family protein | LC | chr1:23636685-23642222 | 20130731
aly-miR166a-3p	Medtr1g054535.1	3	20.276	1	20	812	831	UCGGACCAGGCUUCAUUCCC	GGCAAUGAAACUUGGUUCGA	Translation	| carbon catabolite repressor-like protein | HC | chr1:23604491-23611188 | 20130731
ahy-miR398	Medtr5g043650.1	3	20.725	1	20	135	155	UGUGUUCUCAG-GUCACCCCU	AGGAGUGACACUGAGAACACA	Cleavage	| hypothetical protein | HC | chr5:19181373-19181212 | 20130731
ahy-miR398	Medtr3g078310.1	3	10.287	1	20	1125	1143	UGUGUUCUCAGGUCACCCCU	GGGGGUGAC-UGAGAAUACA	Translation	| hypothetical protein | HC | chr3:35284990-35281014 | 20130731
ahy-miR398	Medtr4g106800.1	3	20.978	1	20	785	803	UGUGUUCUCAGGUCACCCCU	AGGGAUGAC-UGAGAACACA	Translation	| GATA type zinc finger transcription factor family protein | HC | chr4:44086910-44085000 | 20130731
aly-miR396b-5p	Medtr4g094918.1	2	23.051	1	21	605	625	UUCCACAGCUUUCUUGAACUU	AAGAUCAAGGAAGUUGUGGAA	Cleavage	| papain family cysteine protease | HC | chr4:39283313-39286264 | 20130731
aly-miR396b-5p	Medtr3g052060.1	2.5	15.335	1	21	89	109	UUCCACAGCUUUCUUGAACUU	AAGUUCAAGAACGCUGUGCAA	Translation	| hypothetical protein | LC | chr3:20591685-20589235 | 20130731
aly-miR396b-5p	Medtr0462s0020.1	2.5	10.333	1	21	839	859	UUCCACAGCUUUCUUGAACUU	AAGUUCAAGAACGCUGUGCAA	Translation	| Ulp1 protease family, carboxy-terminal domain protein | LC | scaffold0462:13562-11985 | 20130731
aly-miR396b-5p	Medtr4g007080.1	2.5	15.511	1	21	940	960	UUCCACAGCUUUCUUGAACUU	AAGUUGAAGGAAGUUGUGGAG	Cleavage	| NDH-dependent cyclic electron flow protein | HC | chr4:940545-943387 | 20130731
aly-miR396b-5p	Medtr3g464080.1	2.5	16.743	1	21	2282	2302	UUCCACAGCUUUCUUGAACUU	AGGUUCAGGAGAGGUGUGGAA	Cleavage	| Serine/Threonine-kinase CCR4-like protein | HC | chr3:25742327-25739765 | 20130731
aly-miR396b-5p	Medtr4g130540.1	2.5	9.715	1	21	2091	2111	UUCCACAGCUUUCUUGAACUU	AAGAUUGAGAAGGCUGUGGAA	Cleavage	| heat shock 70 kDa protein | HC | chr4:54397596-54395000 | 20130731
aly-miR396b-5p	Medtr4g030200.1	3	20.831	1	21	129	149	UUCCACAGCUUUCUUGAACUU	AUGUUCAAGAAGGCGGUGGAA	Cleavage	| eukaryotic translation initiation factor SUI1-like protein | HC | chr4:10407181-10415634 | 20130731
aly-miR396b-5p	Medtr4g019670.1	3	19.593	1	21	1343	1363	UUCCACAGCUUUCUUGAACUU	GAGUUCAAGAAAACUUUGGAG	Translation	| MADS-box transcription factor family protein | LC | chr4:6197284-6198843 | 20130731
aly-miR396b-5p	Medtr3g099150.1	3	19.203	1	21	140	160	UUCCACAGCUUUCUUGAACUU	AAGUUGAAGAAAUUUGUGGGA	Translation	| nodulin-like/MFS transporter | HC | chr3:45450834-45453582 | 20130731
aly-miR396b-5p	Medtr3g097460.1	3	17.454	1	21	2047	2067	UUCCACAGCUUUCUUGAACUU	AGGUUGAAUAAGGCUGUGGAA	Cleavage	| kinase family protein | HC | chr3:44681008-44678849 | 20130731
aly-miR396b-5p	Medtr0001s0430.1	3	20.056	1	21	1140	1160	UUCCACAGCUUUCUUGAACUU	AAGUUGAGGAGACCUGUGGAA	Translation	| pentatricopeptide (PPR) repeat protein | HC | scaffold0001:195705-188782 | 20130731
aly-miR396b-5p	Medtr8g018280.1	3	12.517	1	21	3537	3557	UUCCACAGCUUUCUUGAACUU	GAGUUGAAGAAGGCGGUGGAA	Cleavage	| disease resistance protein (TIR-NBS-LRR class), putative | LC | chr8:6198456-6190352 | 20130731
aly-miR396b-5p	Medtr8g011230.1	3	22.107	1	21	865	885	UUCCACAGCUUUCUUGAACUU	AAGUUGGAGAACGUUGUGGAA	Translation	| ATP/DNA-binding protein | HC | chr8:2953697-2945349 | 20130731
aly-miR396b-5p	Medtr2g041430.1	2	14.079	1	19	338	357	UUCCACA-GCUUUCUUGAAC	GUUCAAGAAAGCCUGUGGAA	Cleavage	| growth-regulating factor-like protein | HC | chr2:18200260-18198399 | 20130731
aly-miR396b-5p	Medtr8g035910.1	2.5	15.615	1	19	410	429	UUCCAC-AGCUUUCUUGAAC	GUUCAAGAAAGCUUGUGGAA	Cleavage	| growth-regulating factor 4 | HC | chr8:13138965-13135899 | 20130731
aly-miR396b-5p	Medtr4g125490.1	2	15.619	1	19	332	351	UUCCACA-GCUUUCUUGAAC	GUUCAAGAAAGCCUGUGGAA	Cleavage	| growth-regulating factor-like protein | HC | chr4:52051634-52053330 | 20130731
aly-miR396b-5p	Medtr8g020560.1	2	16.326	1	19	474	493	UUCCACA-GCUUUCUUGAAC	GUUCAAGAAAGCCUGUGGAA	Cleavage	| growth-regulating factor-like protein | HC | chr8:7247171-7245246 | 20130731
aly-miR396b-5p	Medtr7g104050.2	2	16.925	1	19	660	679	UUCCACA-GCUUUCUUGAAC	GUUCAAGAAAGCCUGUGGAA	Cleavage	| growth-regulating factor | HC | chr7:42091020-42093749 | 20130731
aly-miR396b-5p	Medtr2g041430.2	2	14.079	1	19	396	415	UUCCACA-GCUUUCUUGAAC	GUUCAAGAAAGCCUGUGGAA	Cleavage	| growth-regulating factor-like protein | HC | chr2:18200318-18197862 | 20130731
aly-miR396b-5p	Medtr5g027030.1	2	14.434	1	19	513	532	UUCCACA-GCUUUCUUGAAC	GUUCAAGAAAGCCUGUGGAA	Cleavage	| growth-regulating factor | HC | chr5:11196291-11199598 | 20130731
aly-miR396b-5p	Medtr7g104050.1	2	16.925	1	19	660	679	UUCCACA-GCUUUCUUGAAC	GUUCAAGAAAGCCUGUGGAA	Cleavage	| growth-regulating factor | HC | chr7:42091020-42093749 | 20130731
aly-miR396b-5p	Medtr0001s0490.1	2	18.686	1	19	651	670	UUCCACA-GCUUUCUUGAAC	GUUCAAGAAAGCCUGUGGAA	Cleavage	| growth-regulating factor | HC | scaffold0001:397821-401891 | 20130731
aly-miR396b-5p	Medtr3g092330.1	2	13.805	1	19	590	609	UUCCACA-GCUUUCUUGAAC	GUUCAAGAAAGCCUGUGGAA	Cleavage	| growth-regulating factor | HC | chr3:42182837-42185284 | 20130731
aly-miR396b-5p	Medtr2g041430.3	2	14.079	1	19	396	415	UUCCACA-GCUUUCUUGAAC	GUUCAAGAAAGCCUGUGGAA	Cleavage	| growth-regulating factor-like protein | HC | chr2:18200318-18197862 | 20130731
aly-miR396b-5p	Medtr1g017490.2	2	22.2	1	19	723	742	UUCCACA-GCUUUCUUGAAC	GUUCAAGAAAGCCUGUGGAA	Cleavage	| growth-regulating factor | HC | chr1:4901660-4905097 | 20130731
aly-miR396b-5p	Medtr1g017490.1	2	22.2	1	19	1067	1086	UUCCACA-GCUUUCUUGAAC	GUUCAAGAAAGCCUGUGGAA	Cleavage	| growth-regulating factor | HC | chr1:4900623-4905273 | 20130731
aly-miR396b-5p	Medtr2g019410.1	3	16.693	1	21	793	813	UUCCACAGCUUUCUUGAACUU	AAGUUCAAAAAAAAUGUGGAA	Translation	| transmembrane protein, putative | HC | chr2:6340725-6342432 | 20130731
aly-miR396b-5p	Medtr1g012600.1	3	17.429	1	21	459	479	UUCCACAGCUUUCUUGAACUU	GAGCUUAAGGAUGCUGUGGAA	Translation	| hypothetical protein | HC | chr1:2549497-2554775 | 20130731
aly-miR396b-5p	Medtr5g024810.1	3	16.569	1	21	1454	1474	UUCCACAGCUUUCUUGAACUU	GGGAUCAAGCAAGCUGUGGAG	Cleavage	| CW-type zinc finger protein | HC | chr5:10011299-9997842 | 20130731
